# Supplementary material for: Genome-Wide RNAi Screening Identifies Genes Inhibiting the Migration of Glioblastoma Cells
Source: PLoS One. 2013 Apr 12;8(4):e61915. doi: 10.1371/journal.pone.0061915 (PMC3625150; doi:10.1371/journal.pone.0061915)
Supplement: Table S1 — Screening approach 1 result. The Cy5/Cy3 ratio values from all the probes were ranked from high to low and the ranking percentile was used for assessing the inhibitory effect of the shRNA on cell migration. This percentile translates to the percentage of shRNAs that have lower Cy5/Cy3 values than it is, so that a higher percentile represents a higher Cy5/Cy3 value. The targeting genes for probes with high ranking are more likely to inhibit GBM cell migration (XLSX) [file pone.0061915.s006.xlsx]

## Sheet: V1A001
Barcode ID	pGIPZ Oligo ID	CY5/CY3 rank% (Exp.1)	CY5/CY3 rank% (Exp.2)	Gene ID	Gene Symbol
OBS_BC_200000	V2LHS_102980	31.07	93.75	283120	H19
OBS_BC_200000	V2LHS_102980	30.03	73.77	283120	H19
OBS_BC_200006	V2LHS_238896	67.7	74.47	55249	YY1AP1
OBS_BC_200006	V2LHS_238896	63.78	61.54	55249	YY1AP1
OBS_BC_200011	V2LHS_165169	97.63	81.71	442117	GALNT17
OBS_BC_200011	V2LHS_165169	86.69	65.14	442117	GALNT17
OBS_BC_200015	V2LHS_18072	99.89	88.13	133690	CAPSL
OBS_BC_200015	V2LHS_18072	99.81	83.74	133690	CAPSL
OBS_BC_200019	V2LHS_85078	37.75	86.84	2218	FKTN
OBS_BC_200021	V2LHS_25489	13.62	10.51	119467	CLRN3
OBS_BC_200023	V2LHS_114134	1.7	3.74	2752, 81846	GLUL, SBF2
OBS_BC_200023	V2LHS_114134	1.66	2.46	2752, 81846	GLUL, SBF2
OBS_BC_200024	V2LHS_262262	56.05	94.15	5571	PRKAG1
OBS_BC_200024	V2LHS_262262	50.23	92.17	5571	PRKAG1
OBS_BC_200025	V2LHS_100166	95.15	67.31	60437	CDH26
OBS_BC_200026	V2LHS_87125	70.24	70.61	5578	PRKCA
OBS_BC_200026	V2LHS_87125	62.06	55.47	5578	PRKCA
OBS_BC_200027	V2LHS_250678	30.96	69.1	10097, 284441	ACTR2, LOC284441
OBS_BC_200028	V2LHS_198629	53.12	71.48	10486	CAP2
OBS_BC_200031	V2LHS_155494	89.29	77.06	55120	FANCL
OBS_BC_200031	V2LHS_155494	81.43	21.16	55120	FANCL
OBS_BC_200034	V2LHS_64495	60.26	55.35	65061	PFTK2
OBS_BC_200034	V2LHS_64495	53.61	46.29	65061	PFTK2
OBS_BC_200036	V2LHS_285754	38.92	31.84	11120	BTN2A1
OBS_BC_200036	V2LHS_285754	34.57	31.35	11120	BTN2A1
OBS_BC_200038	V2LHS_214394	7.51	19.07	155465	AGR3
OBS_BC_200038	V2LHS_214394	7.36	13.41	155465	AGR3
OBS_BC_200042	V2LHS_21657	4.05	4.86	57674	RNF213
OBS_BC_200042	V2LHS_21657	3.74	3.08	57674	RNF213
OBS_BC_200046	V2LHS_131668	31.88	99.97	6164	RPL34
OBS_BC_200050	V2LHS_98965	30.91	42.2	79058	ASPSCR1
OBS_BC_200050	V2LHS_98965	27.79	37.85	79058	ASPSCR1
OBS_BC_200052	V2LHS_188217	6.89	7.01	3755	KCNG1
OBS_BC_200052	V2LHS_188217	6.77	6.97	3755	KCNG1
OBS_BC_200054	V2LHS_90027	76.29	83.88	10	NAT2
OBS_BC_200054	V2LHS_90027	74.41	83.33	10	NAT2
OBS_BC_200055	V2LHS_216772	96.95	77.62	25788, 100128414	RAD54B, LOC100128414
OBS_BC_200055	V2LHS_216772	89.99	65.78	25788, 100128414	RAD54B, LOC100128414
OBS_BC_200056	V2LHS_140436	42.42	66.21	50651	SLC45A1
OBS_BC_200056	V2LHS_140436	38.64	51.93	50651	SLC45A1
OBS_BC_200065	V2LHS_284527	87.98	78.47	4712	NDUFB6
OBS_BC_200065	V2LHS_284527	87.36	67.46	4712	NDUFB6
OBS_BC_200067	V2LHS_170188	98.1	94.46	5413	2010-09-05
OBS_BC_200067	V2LHS_170188	90.88	93.21	5413	2010-09-05
OBS_BC_200069	V2LHS_24238	49.17	35.15	8625	RFXANK
OBS_BC_200069	V2LHS_24238	43.99	29.93	8625	RFXANK
OBS_BC_200072	V2LHS_90735	3.73	0.66	10814	CPLX2
OBS_BC_200072	V2LHS_90735	3.14	0.15	10814	CPLX2
OBS_BC_200073	V2LHS_41434	54.94	47.52	8653, 100130220	DDX3Y, LOC100130220
OBS_BC_200081	V2LHS_114161	24.56	38.34	2770	GNAI1
OBS_BC_200081	V2LHS_114161	23.85	36.98	2770	GNAI1
OBS_BC_200082	V2LHS_203452	76.67	74.12	25989	ULK3
OBS_BC_200082	V2LHS_203452	69.07	71.51	25989	ULK3
OBS_BC_200084	V2LHS_176282	50.58	50.4	192666	KRT24
OBS_BC_200084	V2LHS_176282	44.2	43.46	192666	KRT24
OBS_BC_200085	V2LHS_111546	37.49	99.08	3576	IL8
OBS_BC_200089	V2LHS_114298	35.65	43.37	2935	GSPT1
OBS_BC_200089	V2LHS_114298	29.91	38.22	2935	GSPT1
OBS_BC_200090	V2LHS_39419	76.11	58.35	57084	SLC17A6
OBS_BC_200096	V2LHS_68013	34.06	15.98	9466	IL27RA
OBS_BC_200096	V2LHS_68013	30.05	15.87	9466	IL27RA
OBS_BC_200097	V2LHS_131848	19.2	10.09	2547, 387703, 389901	XRCC6, LOC387703, LOC389901
OBS_BC_200097	V2LHS_131848	17.73	10.03	2547, 387703, 389901	XRCC6, LOC387703, LOC389901
OBS_BC_200098	V2LHS_18111	96.01	79.78	1912	PHC2
OBS_BC_200102	V2LHS_196891	8.03	94.59	11216	AKAP10
OBS_BC_200102	V2LHS_196891	7.15	89.73	11216	AKAP10
OBS_BC_200105	V2LHS_228239	88.58	62.13	83706	FERMT3
OBS_BC_200105	V2LHS_228239	82.96	60.21	83706	FERMT3
OBS_BC_200106	V2LHS_171480	34.17	70.13	7165	TPD52L2
OBS_BC_200110	V2LHS_173034	25.07	13.88	2230	FDX1
OBS_BC_200110	V2LHS_173034	20.07	10.16	2230	FDX1
OBS_BC_200111	V2LHS_70857	80.72	26.11	10317	B3GALT5
OBS_BC_200115	V2LHS_171648	89.5	80.76	7284	TUFM
OBS_BC_200118	V2LHS_268565	96.5	74.8	284486	THEM5
OBS_BC_200118	V2LHS_268565	72.32	53.99	284486	THEM5
OBS_BC_200121	V2LHS_114582	21.89	24.37	26960	NBEA
OBS_BC_200121	V2LHS_114582	19.38	21.84	26960	NBEA
OBS_BC_200122	V2LHS_19740	72.7	59.94	22800	RRAS2
OBS_BC_200122	V2LHS_19740	71.18	45.1	22800	RRAS2
OBS_BC_200124	V2LHS_112250	32.71	27.43	785	CACNB4
OBS_BC_200124	V2LHS_112250	32.01	21.96	785	CACNB4
OBS_BC_200125	V2LHS_206709	95.4	31.31	58512	DLGAP3
OBS_BC_200125	V2LHS_206709	81.63	25.95	58512	DLGAP3
OBS_BC_200126	V2LHS_265510	76.93	72.67	29998	GLTSCR1
OBS_BC_200126	V2LHS_265510	72.33	50.58	29998	GLTSCR1
OBS_BC_200132	V2LHS_89195	9.85	16.67	695	BTK
OBS_BC_200132	V2LHS_89195	9.26	10.08	695	BTK
OBS_BC_200133	V2LHS_150729	33.28	38.06	1291	COL6A1
OBS_BC_200133	V2LHS_150729	22.94	22.64	1291	COL6A1
OBS_BC_200138	V2LHS_26552	79.02	43.4	55536	CDCA7L
OBS_BC_200138	V2LHS_26552	78.08	31.5	55536	CDCA7L
OBS_BC_200145	V2LHS_226930	95.67	87.01	83985	SPNS1
OBS_BC_200145	V2LHS_226930	84.34	85.14	83985	SPNS1
OBS_BC_200149	V2LHS_264426	72.07	72.76	2037	EPB41L2
OBS_BC_200149	V2LHS_264426	69.33	70.54	2037	EPB41L2
OBS_BC_200150	V2LHS_82422	0.7	10.46	3291	HSD11B2
OBS_BC_200150	V2LHS_82422	0.48	10.12	3291	HSD11B2
OBS_BC_200161	V2LHS_246496	77.16	48.81	2746, 2747	GLUD1, GLUD2
OBS_BC_200163	V2LHS_113018	61.71	89.5	1147	CHUK
OBS_BC_200163	V2LHS_113018	60.95	87.17	1147	CHUK
OBS_BC_200169	V2LHS_100079	16.55	12.89	127670	TEDDM1
OBS_BC_200178	V2LHS_244573	65.31	56.39	56254	RNF20
OBS_BC_200178	V2LHS_244573	51.33	16.41	56254	RNF20
OBS_BC_200179	V2LHS_85701	72.85	38.74	22925	PLA2R1
OBS_BC_200182	V2LHS_33292	75.63	70.73	317705	VN1R5
OBS_BC_200182	V2LHS_33292	66.09	31.95	317705	VN1R5
OBS_BC_200183	V2LHS_267094	99.14	95.18	50628	GEMIN4
OBS_BC_200183	V2LHS_267094	96.86	95	50628	GEMIN4
OBS_BC_200185	V2LHS_156616	84.39	88.25	55256	ADI1
OBS_BC_200185	V2LHS_156616	45.91	47.14	55256	ADI1
OBS_BC_200188	V2LHS_24374	58.36	90.36	8618	CADPS
OBS_BC_200190	V2LHS_139500	24.39	13.85	8798	DYRK4
OBS_BC_200191	V2LHS_115834	22.19	8.88	51232	CRIM1
OBS_BC_200193	V2LHS_117293	83.06	91.69	83592	AKR1CL2
OBS_BC_200193	V2LHS_117293	48.31	63.37	83592	AKR1CL2
OBS_BC_200194	V2LHS_245810	13.14	30.77	257240	KLHL34
OBS_BC_200196	V2LHS_16656	27.63	17.78	8804	CREG1
OBS_BC_200196	V2LHS_16656	24.06	12.53	8804	CREG1
OBS_BC_200206	V2LHS_88660	84.26	66.01	1188	CLCNKB
OBS_BC_200206	V2LHS_88660	77.06	59.64	1188	CLCNKB
OBS_BC_200211	V2LHS_134683	75.27	79.15	51088, 284890	KLHL5, LOC284890
OBS_BC_200211	V2LHS_134683	71.25	58.65	51088, 284890	KLHL5, LOC284890
OBS_BC_200214	V2LHS_244812	49.61	59.03	9120, 440459	SLC16A6, LOC440459
OBS_BC_200231	V2LHS_131308	15.73	22.79	5139	PDE3A
OBS_BC_200231	V2LHS_131308	15.04	13.34	5139	PDE3A
OBS_BC_200232	V2LHS_111806	61.73	92.8	596	BCL2
OBS_BC_200232	V2LHS_111806	43.61	88.58	596	BCL2
OBS_BC_200238	V2LHS_202466	66.71	38.89	1030	CDKN2B
OBS_BC_200238	V2LHS_202466	58.4	38.23	1030	CDKN2B
OBS_BC_200239	V2LHS_15301	9.56	6.86	8322	FZD4
OBS_BC_200239	V2LHS_15301	9	2.73	8322	FZD4
OBS_BC_200242	V2LHS_197437	92.22	84.15	11266	DUSP12
OBS_BC_200246	V2LHS_92483	94.41	89.08	6523	SLC5A1
OBS_BC_200246	V2LHS_92483	86.34	88.49	6523	SLC5A1
OBS_BC_200247	V2LHS_84221	44.97	93	10892	MALT1
OBS_BC_200247	V2LHS_84221	33.84	54.53	10892	MALT1
OBS_BC_200252	V2LHS_209237	77.45	81.35	254827	NAALADL2
OBS_BC_200254	V2LHS_266017	98.7	85.48	51188	SS18L2
OBS_BC_200254	V2LHS_266017	54.08	72.26	51188	SS18L2
OBS_BC_200256	V2LHS_67859	19.47	4.27	9493	KIF23
OBS_BC_200256	V2LHS_67859	17.7	3.88	9493	KIF23
OBS_BC_200260	V2LHS_192185	87.23	80.39	81033	KCNH6
OBS_BC_200260	V2LHS_192185	78.37	43.15	81033	KCNH6
OBS_BC_200263	V2LHS_112138	44.31	39.49	552	AVPR1A
OBS_BC_200263	V2LHS_112138	33.31	37.99	552	AVPR1A
OBS_BC_200266	V2LHS_65550	0.94	3.57	29915	HCFC2
OBS_BC_200266	V2LHS_65550	0.35	3.2	29915	HCFC2
OBS_BC_200268	V2LHS_201895	94.85	51.4	546, 652455, 728849	ATRX, LOC652455, LOC728849
OBS_BC_200268	V2LHS_201895	81.66	47.4	546, 652455, 728849	ATRX, LOC652455, LOC728849
OBS_BC_200276	V2LHS_96451	5.38	6.18	25878	MXRA5
OBS_BC_200281	V2LHS_19096	50.93	62.84	5903, 84220, 400966, 652919, 727851, 729540, 729857, 100133510	RANBP2, RGPD5, RGPD1, RGPD7, RGPD8, RGPD6, RGPD2, LOC100133510
OBS_BC_200281	V2LHS_19096	39.53	49.67	5903, 84220, 400966, 652919, 727851, 729540, 729857, 100133510	RANBP2, RGPD5, RGPD1, RGPD7, RGPD8, RGPD6, RGPD2, LOC100133510
OBS_BC_200282	V2LHS_206808	3.77	7.46	23118	MAP3K7IP2
OBS_BC_200282	V2LHS_206808	3.64	3.65	23118	MAP3K7IP2
OBS_BC_200284	V2LHS_113490	38.11	58.57	1775	DNASE1L2
OBS_BC_200284	V2LHS_113490	28.5	50.45	1775	DNASE1L2
OBS_BC_200289	V2LHS_192194	0.99	1.46	51150	SDF4
OBS_BC_200289	V2LHS_192194	0.39	1.23	51150	SDF4
OBS_BC_200291	V2LHS_83635	96.14	83.76	2175	FANCA
OBS_BC_200291	V2LHS_83635	90.31	73.08	2175	FANCA
OBS_BC_200293	V2LHS_49238	34.54	44.37	27	ABL2
OBS_BC_200297	V2LHS_192868	60.14	27.54	79923, 388112	NANOG, NANOGP8
OBS_BC_200297	V2LHS_192868	57.88	17.17	79923, 388112	NANOG, NANOGP8
OBS_BC_200298	V2LHS_238870	91.8	93.43	7468	WHSC1
OBS_BC_200298	V2LHS_238870	83.91	88.82	7468	WHSC1
OBS_BC_200305	V2LHS_89867	36.54	79.67	175	AGA
OBS_BC_200305	V2LHS_89867	34.53	54.32	175	AGA
OBS_BC_200308	V2LHS_94518	36.51	46.85	309	ANXA6
OBS_BC_200308	V2LHS_94518	34	38.59	309	ANXA6
OBS_BC_200314	V2LHS_76254	55.74	51.94	85446	ZFHX2
OBS_BC_200314	V2LHS_76254	42.26	43.63	85446	ZFHX2
OBS_BC_200317	V2LHS_239104	40.15	67.29	4780	NFE2L2
OBS_BC_200317	V2LHS_239104	39.27	31.46	4780	NFE2L2
OBS_BC_200322	V2LHS_37177	2.19	0.65	9134	CCNE2
OBS_BC_200322	V2LHS_37177	2	0.6	9134	CCNE2
OBS_BC_200323	V2LHS_78921	39.84	37.61	10950	BTG3
OBS_BC_200323	V2LHS_78921	37.14	36.03	10950	BTG3
OBS_BC_200331	V2LHS_20674	42.02	98.56	144453	BEST3
OBS_BC_200331	V2LHS_20674	40.17	98.44	144453	BEST3
OBS_BC_200336	V2LHS_71968	2.26	2.48	124872	B4GALNT2
OBS_BC_200336	V2LHS_71968	0.42	2.37	124872	B4GALNT2
OBS_BC_200337	V2LHS_153745	10.32	26.1	6874	TAF4
OBS_BC_200337	V2LHS_153745	8.71	17.55	6874	TAF4
OBS_BC_200343	V2LHS_114094	8.13	5.74	2641	GCG
OBS_BC_200343	V2LHS_114094	7.28	4.91	2641	GCG
OBS_BC_200344	V2LHS_202193	81.85	65.79	10714	POLD3
OBS_BC_200344	V2LHS_202193	66.47	56.91	10714	POLD3
OBS_BC_200353	V2LHS_131910	37.9	77.43	6871	TADA2L
OBS_BC_200353	V2LHS_131910	23.06	40.65	6871	TADA2L
OBS_BC_200359	V2LHS_70822	39.85	34.03	170691	ADAMTS17
OBS_BC_200360	V2LHS_74885	76.58	58.15	50649	ARHGEF4
OBS_BC_200360	V2LHS_74885	52.26	56.06	50649	ARHGEF4
OBS_BC_200362	V2LHS_171334	49.24	66.17	7096	TLR1
OBS_BC_200362	V2LHS_171334	42.06	48.93	7096	TLR1
OBS_BC_200370	V2LHS_250616	83.18	87.8	5791	PTPRE
OBS_BC_200373	V2LHS_228143	39.5	44.26	197259	MLKL
OBS_BC_200375	V2LHS_5781	43.7	47.12	10495	ENOX2
OBS_BC_200375	V2LHS_5781	42.83	38.61	10495	ENOX2
OBS_BC_200379	V2LHS_113824	66.54	72.07	2242	FES
OBS_BC_200379	V2LHS_113824	47.88	55.06	2242	FES
OBS_BC_200382	V2LHS_59746	82.92	78.64	326342	EMR4
OBS_BC_200382	V2LHS_59746	78.51	50.69	326342	EMR4
OBS_BC_200384	V2LHS_89345	53.57	44.32	554	AVPR2
OBS_BC_200384	V2LHS_89345	27.59	15.94	554	AVPR2
OBS_BC_200388	V2LHS_285018	99.82	85.25	3087	HHEX
OBS_BC_200388	V2LHS_285018	98.78	76.87	3087	HHEX
OBS_BC_200389	V2LHS_70190	90.8	90.01	6764	ST5
OBS_BC_200389	V2LHS_70190	87.94	71.21	6764	ST5
OBS_BC_200390	V2LHS_244686	8.57	89.14	9111	NMI
OBS_BC_200397	V2LHS_81006	60.02	48.72	64400	AKTIP
OBS_BC_200397	V2LHS_81006	40.72	37.6	64400	AKTIP
OBS_BC_200398	V2LHS_198646	87.64	79.69	10732	TCFL5
OBS_BC_200399	V2LHS_17861	57.17	29.68	2043	EPHA4
OBS_BC_200399	V2LHS_17861	39.74	24.5	2043	EPHA4
OBS_BC_200402	V2LHS_173591	37.25	69.11	54880	BCOR
OBS_BC_200402	V2LHS_173591	28.72	48.77	54880	BCOR
OBS_BC_200406	V2LHS_130971	43.36	72.14	2983	GUCY1B3
OBS_BC_200407	V2LHS_118922	39.98	40.52	-	-
OBS_BC_200414	V2LHS_62717	38.9	82.22	135114	HINT3
OBS_BC_200414	V2LHS_62717	38.17	71.83	135114	HINT3
OBS_BC_200418	V2LHS_118083	91.06	79.44	54973	CPSF3L
OBS_BC_200418	V2LHS_118083	82.85	74.27	54973	CPSF3L
OBS_BC_200420	V2LHS_242601	54.73	27.97	4632	MYL1
OBS_BC_200420	V2LHS_242601	49.16	11.43	4632	MYL1
OBS_BC_200425	V2LHS_258468	34.13	17.49	65121, 400736, 650236, 729356, 729528	PRAMEF1, PRAMEF13, LOC650236, LOC729356, PRAMEF14
OBS_BC_200425	V2LHS_258468	33.92	14.14	65121, 400736, 650236, 729356, 729528	PRAMEF1, PRAMEF13, LOC650236, LOC729356, PRAMEF14
OBS_BC_200426	V2LHS_266957	11.93	24.18	7855	FZD5
OBS_BC_200431	V2LHS_217815	95.72	62.53	3417	IDH1
OBS_BC_200431	V2LHS_217815	85.34	31.67	3417	IDH1
OBS_BC_200435	V2LHS_29264	24.5	26.31	25973	PARS2
OBS_BC_200436	V2LHS_131551	46.91	97.49	6124, 158345, 391135, 647276	RPL4, LOC158345, LOC391135, LOC647276
OBS_BC_200437	V2LHS_132625	44.71	25.32	354	KLK3
OBS_BC_200443	V2LHS_135444	36.82	37.47	51339	DACT1
OBS_BC_200443	V2LHS_135444	35.04	36.65	51339	DACT1
OBS_BC_200444	V2LHS_177305	61.39	43.29	84818	IL17RC
OBS_BC_200444	V2LHS_177305	53.88	22.51	84818	IL17RC
OBS_BC_200445	V2LHS_19198	74.63	53.61	23553	HYAL4
OBS_BC_200445	V2LHS_19198	52.18	52.8	23553	HYAL4
OBS_BC_200446	V2LHS_62559	90.97	88.98	26821	SNORA74A
OBS_BC_200447	V2LHS_61931	63.1	71.99	1847	DUSP5
OBS_BC_200447	V2LHS_61931	58.02	58.89	1847	DUSP5
OBS_BC_200453	V2LHS_229162	24.61	43.42	80863	PRRT1
OBS_BC_200453	V2LHS_229162	19.29	42.61	80863	PRRT1
OBS_BC_200462	V2LHS_225890	65.1	16.11	-	-
OBS_BC_200462	V2LHS_225890	28.69	6.63	-	-
OBS_BC_200465	V2LHS_90787	59.53	77.86	23040	MYT1L
OBS_BC_200465	V2LHS_90787	57.75	55.29	23040	MYT1L
OBS_BC_200467	V2LHS_48340	82.02	24.34	892	CCNC
OBS_BC_200467	V2LHS_48340	62.07	11.44	892	CCNC
OBS_BC_200468	V2LHS_91344	55.71	25.98	10767	HBS1L
OBS_BC_200472	V2LHS_96183	36.14	76.65	22879	MON1B
OBS_BC_200472	V2LHS_96183	29.8	45.16	22879	MON1B
OBS_BC_200473	V2LHS_177041	13.82	98.02	80024	SLC24A6
OBS_BC_200473	V2LHS_177041	11.33	44.41	80024	SLC24A6
OBS_BC_200474	V2LHS_112733	14.56	8.24	841	CASP8
OBS_BC_200482	V2LHS_259924	88.01	75.99	25813	SAMM50
OBS_BC_200482	V2LHS_259924	69.34	51.18	25813	SAMM50
OBS_BC_200488	V2LHS_270936	96.42	94.23	6555	SLC10A2
OBS_BC_200489	V2LHS_39642	34.7	48.54	113189	CHST14
OBS_BC_200489	V2LHS_39642	17.45	32.98	113189	CHST14
OBS_BC_200491	V2LHS_223907	47.54	87.89	51720	UIMC1
OBS_BC_200491	V2LHS_223907	44.85	61.43	51720	UIMC1
OBS_BC_200497	V2LHS_133537	79.18	47.7	3708	ITPR1
OBS_BC_200497	V2LHS_133537	53.5	31.44	3708	ITPR1
OBS_BC_200500	V2LHS_211830	25.42	83.53	27257	LSM1
OBS_BC_200502	V2LHS_182594	60.88	60.69	79832	QSER1
OBS_BC_200502	V2LHS_182594	51.4	58.84	79832	QSER1
OBS_BC_200503	V2LHS_137547	17.54	24.91	80351	TNKS2
OBS_BC_200503	V2LHS_137547	12.81	24.3	80351	TNKS2
OBS_BC_200505	V2LHS_196809	84.56	64.74	25	ABL1
OBS_BC_200505	V2LHS_196809	82.56	57.21	25	ABL1
OBS_BC_200512	V2LHS_201860	59.42	70.37	11113	CIT
OBS_BC_200512	V2LHS_201860	56.33	61.44	11113	CIT
OBS_BC_200517	V2LHS_93629	73.04	71.9	7252	TSHB
OBS_BC_200517	V2LHS_93629	63.31	61.19	7252	TSHB
OBS_BC_200518	V2LHS_91006	51.72	52.7	10791	VAMP5
OBS_BC_200518	V2LHS_91006	41.96	43.71	10791	VAMP5
OBS_BC_200520	V2LHS_64521	37.15	27.89	10015, 283683, 646278	PDCD6IP, LOC283683, LOC646278
OBS_BC_200520	V2LHS_64521	36.33	17.9	10015, 283683, 646278	PDCD6IP, LOC283683, LOC646278
OBS_BC_200525	V2LHS_193986	19.59	14.69	6164, 342994, 651249, 100129934	RPL34, LOC342994, LOC651249, LOC100129934
OBS_BC_200526	V2LHS_112695	74.77	47.01	817	CAMK2D
OBS_BC_200526	V2LHS_112695	71.26	45.71	817	CAMK2D
OBS_BC_200527	V2LHS_189666	54.38	67.77	81033	KCNH6
OBS_BC_200527	V2LHS_189666	51.93	50.85	81033	KCNH6
OBS_BC_200537	V2LHS_95171	82.6	46.32	11044	POLS
OBS_BC_200540	V2LHS_81289	56.73	84.62	59272	ACE2
OBS_BC_200541	V2LHS_94134	29.93	11.98	8654	PDE5A
OBS_BC_200541	V2LHS_94134	24.49	10.38	8654	PDE5A
OBS_BC_200548	V2LHS_153379	8.14	4.57	6675	UAP1
OBS_BC_200548	V2LHS_153379	6.9	2.08	6675	UAP1
OBS_BC_200551	V2LHS_37851	27.42	19.35	130013	ACMSD
OBS_BC_200551	V2LHS_37851	24.66	11.39	130013	ACMSD
OBS_BC_200555	V2LHS_171797	87.85	88.64	7336	UBE2V2
OBS_BC_200555	V2LHS_171797	79.33	76.6	7336	UBE2V2
OBS_BC_200563	V2LHS_15928	54.81	45.78	129880	BBS5
OBS_BC_200563	V2LHS_15928	49.03	29.62	129880	BBS5
OBS_BC_200565	V2LHS_203006	83.23	70.83	30849	PIK3R4
OBS_BC_200565	V2LHS_203006	67.77	70.64	30849	PIK3R4
OBS_BC_200566	V2LHS_170435	8.59	6.39	5578	PRKCA
OBS_BC_200566	V2LHS_170435	7.59	2.32	5578	PRKCA
OBS_BC_200571	V2LHS_67005	5.29	12.71	1408	CRY2
OBS_BC_200571	V2LHS_67005	4.22	6.92	1408	CRY2
OBS_BC_200574	V2LHS_16901	65.67	36.89	2814	GP5
OBS_BC_200574	V2LHS_16901	51.97	22.61	2814	GP5
OBS_BC_200579	V2LHS_52949	91.24	66.42	8867	SYNJ1
OBS_BC_200579	V2LHS_52949	83.34	59.01	8867	SYNJ1
OBS_BC_200580	V2LHS_117294	8.82	9.42	83592	AKR1CL2
OBS_BC_200580	V2LHS_117294	7.31	7.15	83592	AKR1CL2
OBS_BC_200581	V2LHS_250765	90.37	88.43	4301	MLLT4
OBS_BC_200581	V2LHS_250765	77.15	46.51	4301	MLLT4
OBS_BC_200583	V2LHS_137664	1.27	9.14	81615	TMEM163
OBS_BC_200585	V2LHS_151680	38.86	24.2	4200	ME2
OBS_BC_200585	V2LHS_151680	38.48	16.3	4200	ME2
OBS_BC_200587	V2LHS_258869	56.8	85.53	57446	NDRG3
OBS_BC_200587	V2LHS_258869	22.24	48.17	57446	NDRG3
OBS_BC_200588	V2LHS_265652	70.3	59.45	51510	CHMP5
OBS_BC_200588	V2LHS_265652	66.41	48.97	51510	CHMP5
OBS_BC_200590	V2LHS_97990	25.03	32.88	389136	VGLL3
OBS_BC_200590	V2LHS_97990	23.76	14.18	389136	VGLL3
OBS_BC_200591	V2LHS_198943	88.75	85.82	27040, 83985	LAT, SPNS1
OBS_BC_200591	V2LHS_198943	88.43	50.93	27040, 83985	LAT, SPNS1
OBS_BC_200592	V2LHS_202619	79.09	49.77	8812	CCNK
OBS_BC_200592	V2LHS_202619	70.6	30.42	8812	CCNK
OBS_BC_200593	V2LHS_278661	22.68	15.36	629	CFB
OBS_BC_200593	V2LHS_278661	19.81	11.26	629	CFB
OBS_BC_200596	V2LHS_15289	84.61	62.64	572	BAD
OBS_BC_200596	V2LHS_15289	71.46	61.77	572	BAD
OBS_BC_200604	V2LHS_91396	38.69	34.3	11337	GABARAP
OBS_BC_200604	V2LHS_91396	35.21	18.87	11337	GABARAP
OBS_BC_200609	V2LHS_113207	63.63	87.54	1397	CRIP2
OBS_BC_200609	V2LHS_113207	53.98	45.46	1397	CRIP2
OBS_BC_200612	V2LHS_152148	88.98	82.98	4683	NBN
OBS_BC_200613	V2LHS_115092	50.62	54.34	50939	IMPG2
OBS_BC_200613	V2LHS_115092	44.29	51.57	50939	IMPG2
OBS_BC_200614	V2LHS_27412	41.46	39.26	8534	CHST1
OBS_BC_200614	V2LHS_27412	38.93	23.52	8534	CHST1
OBS_BC_200615	V2LHS_170972	85.03	67	5789	PTPRD
OBS_BC_200615	V2LHS_170972	70.86	29.13	5789	PTPRD
OBS_BC_200616	V2LHS_201808	26.76	96.95	11083	DIDO1
OBS_BC_200616	V2LHS_201808	14.04	96.56	11083	DIDO1
OBS_BC_200617	V2LHS_169788	51.43	33.26	5154	PDGFA
OBS_BC_200617	V2LHS_169788	42.89	17.6	5154	PDGFA
OBS_BC_200619	V2LHS_131565	6.36	19.17	6128, 56252, 641814, 642828, 645387, 646483	RPL6, YLPM1, LOC641814, LOC642828, LOC645387, LOC646483
OBS_BC_200619	V2LHS_131565	5.88	17.02	6128, 56252, 641814, 642828, 645387, 646483	RPL6, YLPM1, LOC641814, LOC642828, LOC645387, LOC646483
OBS_BC_200620	V2LHS_85691	76.58	80.89	28227, 390705, 647208, 100134089	PPP2R3B, LOC390705, LOC647208, LOC100134089
OBS_BC_200620	V2LHS_85691	74.42	76.8	28227, 390705, 647208, 100134089	PPP2R3B, LOC390705, LOC647208, LOC100134089
OBS_BC_200624	V2LHS_113164	47.16	50.33	1362	CPD
OBS_BC_200624	V2LHS_113164	39.01	41.12	1362	CPD
OBS_BC_200629	V2LHS_47726	9.1	12.34	8906	AP1G2
OBS_BC_200629	V2LHS_47726	8.35	7.02	8906	AP1G2
OBS_BC_200631	V2LHS_91142	23.64	30.62	10776, 643896, 646227	ARPP-19, hCG_1790474, hCG_18385
OBS_BC_200631	V2LHS_91142	21.91	22.04	10776, 643896, 646227	ARPP-19, hCG_1790474, hCG_18385
OBS_BC_200635	V2LHS_76238	51.06	76.32	4644	MYO5A
OBS_BC_200635	V2LHS_76238	41.38	75.14	4644	MYO5A
OBS_BC_200637	V2LHS_85902	33.34	12.51	-	-
OBS_BC_200637	V2LHS_85902	31.1	11.86	-	-
OBS_BC_200638	V2LHS_90626	18.99	28.92	10850	CCL27
OBS_BC_200639	V2LHS_267272	93.89	86.91	116369	SLC26A8
OBS_BC_200639	V2LHS_267272	88.13	76.62	116369	SLC26A8
OBS_BC_200642	V2LHS_24648	56.59	41.46	25792	CIZ1
OBS_BC_200642	V2LHS_24648	45.86	30.96	25792	CIZ1
OBS_BC_200643	V2LHS_113570	39.18	25.73	1837	DTNA
OBS_BC_200643	V2LHS_113570	32.96	24.55	1837	DTNA
OBS_BC_200652	V2LHS_99180	81.49	75.84	116983	CENTB5
OBS_BC_200652	V2LHS_99180	38.66	44.05	116983	CENTB5
OBS_BC_200658	V2LHS_26057	21.44	18.6	-	-
OBS_BC_200658	V2LHS_26057	14.44	14.29	-	-
OBS_BC_200659	V2LHS_195917	24.04	7.09	100128564	UNQ353
OBS_BC_200659	V2LHS_195917	17.19	4.98	100128564	UNQ353
OBS_BC_200660	V2LHS_20620	13.43	9.1	-	-
OBS_BC_200660	V2LHS_20620	13.11	9.06	-	-
OBS_BC_200663	V2LHS_23984	33.39	99.26	8651	SOCS1
OBS_BC_200663	V2LHS_23984	28.04	97.4	8651	SOCS1
OBS_BC_200664	V2LHS_206921	59.89	63.23	64072	CDH23
OBS_BC_200664	V2LHS_206921	51.11	21.66	64072	CDH23
OBS_BC_200668	V2LHS_117094	36.85	64.18	83464	APH1B
OBS_BC_200681	V2LHS_156712	66.53	16.86	55275	VPS53
OBS_BC_200682	V2LHS_238966	57.63	8.67	8780	RIOK3
OBS_BC_200682	V2LHS_238966	32.22	8.25	8780	RIOK3
OBS_BC_200684	V2LHS_198545	92.13	93.63	11218	DDX20
OBS_BC_200684	V2LHS_198545	67.79	87.99	11218	DDX20
OBS_BC_200688	V2LHS_100916	21.73	20.91	23397	NCAPH
OBS_BC_200689	V2LHS_206541	24.84	38.85	63027	SLC22A23
OBS_BC_200689	V2LHS_206541	18.87	23.42	63027	SLC22A23
OBS_BC_200690	V2LHS_140394	85.41	40.29	157708	SEC11B
OBS_BC_200693	V2LHS_268066	68.57	60.92	9898	UBAP2L
OBS_BC_200693	V2LHS_268066	60.31	58.73	9898	UBAP2L
OBS_BC_200700	V2LHS_116771	39.8	17.64	26292, 81025	MYCBP, GJA9
OBS_BC_200700	V2LHS_116771	28.74	15.57	26292, 81025	MYCBP, GJA9
OBS_BC_200702	V2LHS_15173	90.03	93.54	683	BST1
OBS_BC_200702	V2LHS_15173	83.7	88.25	683	BST1
OBS_BC_200703	V2LHS_56014	29.84	41.14	7844	RNF103
OBS_BC_200703	V2LHS_56014	24.35	18.52	7844	RNF103
OBS_BC_200709	V2LHS_41471	2.83	5.45	8313	AXIN2
OBS_BC_200709	V2LHS_41471	2.13	4.12	8313	AXIN2
OBS_BC_200710	V2LHS_68589	49.6	33.41	10019	SH2B3
OBS_BC_200710	V2LHS_68589	45	31.98	10019	SH2B3
OBS_BC_200712	V2LHS_115851	84.84	89.65	26499	PLEK2
OBS_BC_200712	V2LHS_115851	84	70.31	26499	PLEK2
OBS_BC_200713	V2LHS_42834	48.67	71.1	25828	TXN2
OBS_BC_200713	V2LHS_42834	47.21	55.04	25828	TXN2
OBS_BC_200714	V2LHS_133534	84.62	70.03	3707	ITPKB
OBS_BC_200714	V2LHS_133534	60.68	56.33	3707	ITPKB
OBS_BC_200728	V2LHS_91973	57.98	95.19	26579	MYEOV
OBS_BC_200728	V2LHS_91973	56.69	92.69	26579	MYEOV
OBS_BC_200730	V2LHS_120368	52	19.08	285440	CYP4V2
OBS_BC_200734	V2LHS_152727	34.87	62.1	5128	PCTK2
OBS_BC_200734	V2LHS_152727	25.23	50.62	5128	PCTK2
OBS_BC_200741	V2LHS_198537	35.01	68.48	11082	ESM1
OBS_BC_200741	V2LHS_198537	34.46	18.69	11082	ESM1
OBS_BC_200746	V2LHS_179258	30.09	92.85	30011	SH3KBP1
OBS_BC_200746	V2LHS_179258	29.26	59.25	30011	SH3KBP1
OBS_BC_200748	V2LHS_100341	30.14	79.84	284525	SLC9A11
OBS_BC_200748	V2LHS_100341	27.31	46.72	284525	SLC9A11
OBS_BC_200749	V2LHS_196121	18.26	17.85	57626	KLHL1
OBS_BC_200749	V2LHS_196121	17.68	12.47	57626	KLHL1
OBS_BC_200753	V2LHS_39221	11.81	96.32	-	-
OBS_BC_200753	V2LHS_39221	10.52	94.48	-	-
OBS_BC_200761	V2LHS_74027	43.69	79.46	23619	ZIM2
OBS_BC_200761	V2LHS_74027	35.5	66.71	23619	ZIM2
OBS_BC_200762	V2LHS_24541	8.33	9.25	1181	CLCN2
OBS_BC_200762	V2LHS_24541	8.04	8.72	1181	CLCN2
OBS_BC_200767	V2LHS_76063	39.2	88.51	5727	PTCH1
OBS_BC_200767	V2LHS_76063	33.55	87.23	5727	PTCH1
OBS_BC_200773	V2LHS_5961	36.15	61.37	11104	KATNA1
OBS_BC_200773	V2LHS_5961	32.4	52.26	11104	KATNA1
OBS_BC_200775	V2LHS_83430	22.74	23.12	65117	RSRC2
OBS_BC_200775	V2LHS_83430	20.87	18.78	65117	RSRC2
OBS_BC_200776	V2LHS_93963	35.07	88.97	6558	SLC12A2
OBS_BC_200777	V2LHS_132867	23.83	77.93	528	ATP6V1C1
OBS_BC_200777	V2LHS_132867	20.66	26.85	528	ATP6V1C1
OBS_BC_200778	V2LHS_133848	8.51	3.16	3899	AFF3
OBS_BC_200778	V2LHS_133848	7.66	1.47	3899	AFF3
OBS_BC_200780	V2LHS_28274	47.23	29.22	9322	TRIP10
OBS_BC_200780	V2LHS_28274	43.46	10.73	9322	TRIP10
OBS_BC_200781	V2LHS_77374	42.13	62.59	514, 432369	ATP5E, ATP5EP2
OBS_BC_200781	V2LHS_77374	31.22	53.75	514, 432369	ATP5E, ATP5EP2
OBS_BC_200786	V2LHS_19326	4	4.4	124404	2010-09-12
OBS_BC_200786	V2LHS_19326	1.63	3.44	124404	2010-09-12
OBS_BC_200787	V2LHS_21434	99.21	62.27	56751	BARHL1
OBS_BC_200787	V2LHS_21434	85.2	58.1	56751	BARHL1
OBS_BC_200790	V2LHS_253008	86.41	70.22	10189, 644811	THOC4, LOC644811
OBS_BC_200790	V2LHS_253008	74.52	48.89	10189, 644811	THOC4, LOC644811
OBS_BC_200791	V2LHS_12735	91.52	96.93	27018	NGFRAP1
OBS_BC_200791	V2LHS_12735	87.86	85.78	27018	NGFRAP1
OBS_BC_200792	V2LHS_89609	23.77	25.57	25786	DGCR11
OBS_BC_200794	V2LHS_224282	14.08	95.49	1525	CXADR
OBS_BC_200794	V2LHS_224282	13.97	94.52	1525	CXADR
OBS_BC_200796	V2LHS_114575	44.07	17.03	4616	GADD45B
OBS_BC_200796	V2LHS_114575	38.1	9.2	4616	GADD45B
OBS_BC_200797	V2LHS_201085	51.13	56.14	259236	TMIE
OBS_BC_200797	V2LHS_201085	35.78	24.43	259236	TMIE
OBS_BC_200798	V2LHS_69935	7.26	4.6	7142	TNP2
OBS_BC_200799	V2LHS_153703	16.18	25.46	6850	SYK
OBS_BC_200799	V2LHS_153703	13.13	20.16	6850	SYK
OBS_BC_200803	V2LHS_204269	5.87	18.61	4345	CD200
OBS_BC_200803	V2LHS_204269	5.47	15.31	4345	CD200
OBS_BC_200809	V2LHS_91656	8.41	11.78	27314	RAB30
OBS_BC_200809	V2LHS_91656	8.34	4.21	27314	RAB30
OBS_BC_200810	V2LHS_37057	19.51	95.89	9141	PDCD5
OBS_BC_200812	V2LHS_154146	75.25	35.12	50507	NOX4
OBS_BC_200813	V2LHS_198082	57.68	96.39	23478, 157708	SEC11A, SEC11B
OBS_BC_200813	V2LHS_198082	52.84	95.3	23478, 157708	SEC11A, SEC11B
OBS_BC_200817	V2LHS_75078	65.03	68.97	23368	PPP1R13B
OBS_BC_200817	V2LHS_75078	56.75	66.53	23368	PPP1R13B
OBS_BC_200818	V2LHS_111568	60.23	37.73	3562	IL3
OBS_BC_200819	V2LHS_203075	48.77	39.22	1477	CSTF1
OBS_BC_200819	V2LHS_203075	43.78	36.39	1477	CSTF1
OBS_BC_200822	V2LHS_134954	18.72	31.2	51280	GOLM1
OBS_BC_200822	V2LHS_134954	16.42	8.34	51280	GOLM1
OBS_BC_200825	V2LHS_27130	94.47	87.59	8567	MADD
OBS_BC_200825	V2LHS_27130	67.27	80.01	8567	MADD
OBS_BC_200837	V2LHS_201820	23.53	38.43	164	AP1G1
OBS_BC_200837	V2LHS_201820	21.56	32.56	164	AP1G1
OBS_BC_200838	V2LHS_17662	53.46	59.4	2059	EPS8
OBS_BC_200838	V2LHS_17662	49.91	18.92	2059	EPS8
OBS_BC_200843	V2LHS_151362	17.49	18.67	1962	EHHADH
OBS_BC_200846	V2LHS_135218	0.3	4.14	51308	REEP2
OBS_BC_200847	V2LHS_18793	53.87	46.34	3751	KCND2
OBS_BC_200847	V2LHS_18793	47.34	35.84	3751	KCND2
OBS_BC_200848	V2LHS_50920	85.14	86.71	54453	RIN2
OBS_BC_200848	V2LHS_50920	83.54	74.31	54453	RIN2
OBS_BC_200850	V2LHS_200857	67.78	22.89	56000	NXF3
OBS_BC_200852	V2LHS_118831	6.67	9.54	79659	DYNC2H1
OBS_BC_200859	V2LHS_196913	76.97	32.02	11211	FZD10
OBS_BC_200862	V2LHS_86892	23.36	19.41	55582, 100129901	KIF27, LOC100129901
OBS_BC_200862	V2LHS_86892	17.1	16	55582, 100129901	KIF27, LOC100129901
OBS_BC_200863	V2LHS_152356	99.75	87.13	4893	NRAS
OBS_BC_200863	V2LHS_152356	98.83	78.06	4893	NRAS
OBS_BC_200866	V2LHS_245497	82.07	96.18	5269	SERPINB6
OBS_BC_200866	V2LHS_245497	71.08	53.35	5269	SERPINB6
OBS_BC_200870	V2LHS_135851	50.6	35.16	79165	LENG1
OBS_BC_200870	V2LHS_135851	48.81	33.17	79165	LENG1
OBS_BC_200873	V2LHS_245805	83.61	73.22	5365	PLXNB3
OBS_BC_200878	V2LHS_137409	17.05	16.58	80310	PDGFD
OBS_BC_200878	V2LHS_137409	16.42	8.97	80310	PDGFD
OBS_BC_200883	V2LHS_83637	26.23	99.25	2175	FANCA
OBS_BC_200883	V2LHS_83637	26.12	99.05	2175	FANCA
OBS_BC_200884	V2LHS_112712	68.75	53.15	837	CASP4
OBS_BC_200884	V2LHS_112712	59.72	31.94	837	CASP4
OBS_BC_200887	V2LHS_93869	70.97	40.04	6234, 650788	RPS28, LOC650788
OBS_BC_200887	V2LHS_93869	67.52	33.34	6234, 650788	RPS28, LOC650788
OBS_BC_200888	V2LHS_99596	33.99	47.58	91869	RFT1
OBS_BC_200888	V2LHS_99596	30.43	13.44	91869	RFT1
OBS_BC_200891	V2LHS_200043	80.17	81.51	6534	SLC6A7
OBS_BC_200891	V2LHS_200043	51.15	63.39	6534	SLC6A7
OBS_BC_200892	V2LHS_175431	52.22	48.46	55801	IL26
OBS_BC_200892	V2LHS_175431	44.48	42.97	55801	IL26
OBS_BC_200895	V2LHS_94323	41.18	69.16	114, 100134077	ADCY8, LOC100134077
OBS_BC_200895	V2LHS_94323	34.66	54.4	114, 100134077	ADCY8, LOC100134077
OBS_BC_200896	V2LHS_47925	55.23	41.3	8879	SGPL1
OBS_BC_200896	V2LHS_47925	46.38	40.32	8879	SGPL1
OBS_BC_200898	V2LHS_191905	97.81	90.88	-	-
OBS_BC_200898	V2LHS_191905	97.8	84.45	-	-
OBS_BC_200899	V2LHS_238906	68.86	95.93	8899	PRPF4B
OBS_BC_200899	V2LHS_238906	59.84	82.53	8899	PRPF4B
OBS_BC_200900	V2LHS_172982	44.49	86.45	2070	EYA4
OBS_BC_200900	V2LHS_172982	40.34	42.28	2070	EYA4
OBS_BC_200901	V2LHS_270929	44.12	94.83	83658	DYNLRB1
OBS_BC_200905	V2LHS_97553	5.24	5.23	51660	BRP44L
OBS_BC_200909	V2LHS_156848	3.59	2.78	79665	DHX40
OBS_BC_200909	V2LHS_156848	2.66	1.21	79665	DHX40
OBS_BC_200924	V2LHS_33324	11.53	12.91	200634	KRTCAP3
OBS_BC_200924	V2LHS_33324	8.83	3.21	200634	KRTCAP3
OBS_BC_200928	V2LHS_35583	86.56	86.03	57534	MIB1
OBS_BC_200928	V2LHS_35583	77.11	85.73	57534	MIB1
OBS_BC_200931	V2LHS_66860	93.17	94.21	1933, 1935, 644820, 647030	EEF1B2, EEF1B4, hCG_1983058, hCG_19809
OBS_BC_200931	V2LHS_66860	92.43	62.52	1933, 1935, 644820, 647030	EEF1B2, EEF1B4, hCG_1983058, hCG_19809
OBS_BC_200938	V2LHS_34860	2.54	10.37	6641	SNTB1
OBS_BC_200938	V2LHS_34860	0.99	0.81	6641	SNTB1
OBS_BC_200941	V2LHS_97924	75.3	82.9	51411	BIN2
OBS_BC_200941	V2LHS_97924	74.14	52.65	51411	BIN2
OBS_BC_200942	V2LHS_239268	25.95	17.59	5916	RARG
OBS_BC_200942	V2LHS_239268	20.89	16.72	5916	RARG
OBS_BC_200943	V2LHS_192880	16.66	40.85	472, 651610	ATM, LOC651610
OBS_BC_200948	V2LHS_133258	1.51	7.8	3620	INDO
OBS_BC_200955	V2LHS_206692	17.77	7.77	27180	SIGLEC9
OBS_BC_200958	V2LHS_94659	67.17	76.43	545, 651921	ATR, LOC651921
OBS_BC_200958	V2LHS_94659	38.31	72.45	545, 651921	ATR, LOC651921
OBS_BC_200962	V2LHS_18691	49.49	72.36	6421	SFPQ
OBS_BC_200962	V2LHS_18691	42.55	49.31	6421	SFPQ
OBS_BC_200963	V2LHS_238932	96.86	89.58	57147	SCYL3
OBS_BC_200963	V2LHS_238932	92.34	80.97	57147	SCYL3
OBS_BC_200964	V2LHS_39932	23.48	27.77	57020	C16orf62
OBS_BC_200964	V2LHS_39932	20.55	15.37	57020	C16orf62
OBS_BC_200966	V2LHS_174015	69.9	55.75	27440	CECR5
OBS_BC_200966	V2LHS_174015	35.36	44.12	27440	CECR5
OBS_BC_200971	V2LHS_15331	71.97	65.26	427	ASAH1
OBS_BC_200971	V2LHS_15331	52.63	32.13	427	ASAH1
OBS_BC_200972	V2LHS_18487	82.36	91.22	6568	SLC17A1
OBS_BC_200972	V2LHS_18487	60.61	63.3	6568	SLC17A1
OBS_BC_200973	V2LHS_70791	85.3	85.67	27189	IL17C
OBS_BC_200973	V2LHS_70791	75.85	64.32	27189	IL17C
OBS_BC_200977	V2LHS_228705	41.65	19.31	81889	FAHD1
OBS_BC_200977	V2LHS_228705	37.41	14.44	81889	FAHD1
OBS_BC_200979	V2LHS_211926	56.07	61.61	10687	PNMA2
OBS_BC_200979	V2LHS_211926	25.41	53.51	10687	PNMA2
OBS_BC_200983	V2LHS_116282	4.02	2.33	93973	ACTR8
OBS_BC_200983	V2LHS_116282	3.37	1.76	93973	ACTR8
OBS_BC_200987	V2LHS_213736	67.34	56.08	10678	B3GNT2
OBS_BC_200989	V2LHS_83743	22.33	32.68	2160	F11
OBS_BC_200989	V2LHS_83743	19.86	25.36	2160	F11
OBS_BC_200996	V2LHS_16958	58.47	51.22	2786	GNG4
OBS_BC_200996	V2LHS_16958	46.48	29.57	2786	GNG4
OBS_BC_201000	V2LHS_16848	9.35	88.65	3028	HSD17B10
OBS_BC_201000	V2LHS_16848	8.6	14.39	3028	HSD17B10
OBS_BC_201001	V2LHS_191722	13.5	7.37	83959	SLC4A11
OBS_BC_201001	V2LHS_191722	13.22	6.56	83959	SLC4A11
OBS_BC_201002	V2LHS_124048	53.74	65.5	343702	XKR7
OBS_BC_201002	V2LHS_124048	52.94	40.3	343702	XKR7
OBS_BC_201003	V2LHS_118517	48.07	98.74	84447	SYVN1
OBS_BC_201003	V2LHS_118517	36.98	91.27	84447	SYVN1
OBS_BC_201004	V2LHS_90389	29.47	26.75	10875	FGL2
OBS_BC_201010	V2LHS_112982	26.6	21.01	1107	CHD3
OBS_BC_201010	V2LHS_112982	23.55	11.7	1107	CHD3
OBS_BC_201012	V2LHS_202414	55.3	11.72	6426	SFRS1
OBS_BC_201012	V2LHS_202414	45.27	7.36	6426	SFRS1
OBS_BC_201016	V2LHS_115481	77.74	60.1	51194	IPO11
OBS_BC_201016	V2LHS_115481	65	55.21	51194	IPO11
OBS_BC_201018	V2LHS_172686	92.14	61.81	416	ARSF
OBS_BC_201018	V2LHS_172686	72.94	46.98	416	ARSF
OBS_BC_201024	V2LHS_177602	45.89	46.95	84889	SLC7A3
OBS_BC_201024	V2LHS_177602	42.21	28.05	84889	SLC7A3
OBS_BC_201025	V2LHS_117722	83.73	81.32	83990	BRIP1
OBS_BC_201025	V2LHS_117722	75.75	80.99	83990	BRIP1
OBS_BC_201028	V2LHS_196226	72.71	29.61	10671	DCTN6
OBS_BC_201029	V2LHS_66358	13.24	10.62	54677	CROT
OBS_BC_201029	V2LHS_66358	13.04	9.36	54677	CROT
OBS_BC_201030	V2LHS_94470	44.33	97.96	283	ANG
OBS_BC_201030	V2LHS_94470	42.59	92.9	283	ANG
OBS_BC_201033	V2LHS_130512	18.53	16.73	284996	RNF149
OBS_BC_201034	V2LHS_87605	60.76	54.52	23169	SLC35D1
OBS_BC_201034	V2LHS_87605	40.38	38.65	23169	SLC35D1
OBS_BC_201036	V2LHS_34383	59.8	38.71	26281	FGF20
OBS_BC_201036	V2LHS_34383	53.34	35.91	26281	FGF20
OBS_BC_201039	V2LHS_91574	29.07	25.15	10752	CHL1
OBS_BC_201039	V2LHS_91574	28.26	13.13	10752	CHL1
OBS_BC_201041	V2LHS_185695	31.55	88.74	5522	PPP2R2C
OBS_BC_201041	V2LHS_185695	21.75	70.8	5522	PPP2R2C
OBS_BC_201042	V2LHS_103252	49.56	67.13	57680	CHD8
OBS_BC_201042	V2LHS_103252	44.32	47.97	57680	CHD8
OBS_BC_201052	V2LHS_50572	33.37	32.34	9637	FEZ2
OBS_BC_201052	V2LHS_50572	27.91	23.4	9637	FEZ2
OBS_BC_201056	V2LHS_89366	18.82	17.71	472, 651610	ATM, LOC651610
OBS_BC_201056	V2LHS_89366	18.55	15.55	472, 651610	ATM, LOC651610
OBS_BC_201058	V2LHS_135025	92.14	46.48	-	-
OBS_BC_201058	V2LHS_135025	88.21	37.54	-	-
OBS_BC_201061	V2LHS_241668	13.19	76.37	8737	RIPK1
OBS_BC_201061	V2LHS_241668	10.56	53.18	8737	RIPK1
OBS_BC_201063	V2LHS_33078	39.09	38.28	8402	SLC25A11
OBS_BC_201063	V2LHS_33078	29.85	33.3	8402	SLC25A11
OBS_BC_201067	V2LHS_227988	82.51	35.68	126433	FBXO27
OBS_BC_201067	V2LHS_227988	72.36	32.75	126433	FBXO27
OBS_BC_201068	V2LHS_93043	61.22	62.94	5122	PCSK1
OBS_BC_201070	V2LHS_85141	39.64	97.97	1730	DIAPH2
OBS_BC_201070	V2LHS_85141	36.03	96.86	1730	DIAPH2
OBS_BC_201077	V2LHS_58932	78.26	60.75	5168	ENPP2
OBS_BC_201077	V2LHS_58932	39.05	58.77	5168	ENPP2
OBS_BC_201079	V2LHS_243817	61.32	26.83	57030	SLC17A7
OBS_BC_201079	V2LHS_243817	45.23	26.58	57030	SLC17A7
OBS_BC_201081	V2LHS_93048	63.67	44.88	5145	PDE6A
OBS_BC_201081	V2LHS_93048	59.75	40.54	5145	PDE6A
OBS_BC_201090	V2LHS_96145	62.04	64.09	22873	DZIP1
OBS_BC_201090	V2LHS_96145	59.25	56.51	22873	DZIP1
OBS_BC_201094	V2LHS_175484	55.58	27.87	50515	CHST11
OBS_BC_201098	V2LHS_114653	51.03	38.42	2882	GPX7
OBS_BC_201098	V2LHS_114653	49.74	28.8	2882	GPX7
OBS_BC_201100	V2LHS_257385	51.32	66.49	22821	RASA3
OBS_BC_201104	V2LHS_49799	11.31	60	9984	THOC1
OBS_BC_201106	V2LHS_196726	81.35	74.25	10544	PROCR
OBS_BC_201106	V2LHS_196726	75.45	56.09	10544	PROCR
OBS_BC_201108	V2LHS_169857	98.5	54.21	5194	PEX13
OBS_BC_201108	V2LHS_169857	91.48	48.86	5194	PEX13
OBS_BC_201110	V2LHS_202335	88.16	84.34	546, 728849	ATRX, LOC728849
OBS_BC_201110	V2LHS_202335	82.33	83.7	546, 728849	ATRX, LOC728849
OBS_BC_201113	V2LHS_196824	20.83	17.56	10282	BET1
OBS_BC_201114	V2LHS_118229	88.81	92.74	115677	NOSTRIN
OBS_BC_201114	V2LHS_118229	66.78	90.72	115677	NOSTRIN
OBS_BC_201116	V2LHS_150765	90.75	63.73	1306	COL15A1
OBS_BC_201116	V2LHS_150765	77	35.73	1306	COL15A1
OBS_BC_201117	V2LHS_111071	55.14	60.78	7415	VCP
OBS_BC_201121	V2LHS_92809	8.9	57.67	1959	EGR2
OBS_BC_201121	V2LHS_92809	8.66	41.92	1959	EGR2
OBS_BC_201124	V2LHS_28744	25.75	17.16	22936	ELL2
OBS_BC_201124	V2LHS_28744	19.25	16.21	22936	ELL2
OBS_BC_201131	V2LHS_203010	73.96	26.01	7013, 283523, 648283	TERF1, LOC283523, LOC648283
OBS_BC_201131	V2LHS_203010	67.36	19.89	7013, 283523, 648283	TERF1, LOC283523, LOC648283
OBS_BC_201132	V2LHS_100172	10.86	9.82	147409	DSG4
OBS_BC_201132	V2LHS_100172	7.1	6.87	147409	DSG4
OBS_BC_201137	V2LHS_94682	98.22	50.96	578	BAK1
OBS_BC_201137	V2LHS_94682	87.91	34.75	578	BAK1
OBS_BC_201140	V2LHS_117619	46.08	45.06	83935	TMEM133
OBS_BC_201140	V2LHS_117619	44.51	36.58	83935	TMEM133
OBS_BC_201145	V2LHS_278600	14.77	33.01	6594	SMARCA1
OBS_BC_201145	V2LHS_278600	12.42	23.65	6594	SMARCA1
OBS_BC_201150	V2LHS_95075	42.97	50.1	8092	ALX1
OBS_BC_201150	V2LHS_95075	42.24	19.16	8092	ALX1
OBS_BC_201155	V2LHS_35375	54.3	54.83	9360	PPIG
OBS_BC_201155	V2LHS_35375	49.84	43.93	9360	PPIG
OBS_BC_201157	V2LHS_93543	21.21	16.6	5378	PMS1
OBS_BC_201169	V2LHS_212606	75.43	82.5	63940	GPSM3
OBS_BC_201169	V2LHS_212606	73.95	78.12	63940	GPSM3
OBS_BC_201174	V2LHS_114297	4.16	8.09	2935	GSPT1
OBS_BC_201174	V2LHS_114297	3.9	1.65	2935	GSPT1
OBS_BC_201176	V2LHS_103114	78.94	60.16	283298	OLFML1
OBS_BC_201176	V2LHS_103114	72.56	33.37	283298	OLFML1
OBS_BC_201177	V2LHS_238967	45.87	24.61	7903	ST8SIA4
OBS_BC_201177	V2LHS_238967	37.61	11.06	7903	ST8SIA4
OBS_BC_201187	V2LHS_43649	23.14	12.11	9271	PIWIL1
OBS_BC_201187	V2LHS_43649	22.43	6.09	9271	PIWIL1
OBS_BC_201188	V2LHS_83539	59.76	98.77	2263	FGFR2
OBS_BC_201188	V2LHS_83539	44.57	93.33	2263	FGFR2
OBS_BC_201191	V2LHS_162397	72.17	83.51	8476	CDC42BPA
OBS_BC_201191	V2LHS_162397	57.18	69.21	8476	CDC42BPA
OBS_BC_201192	V2LHS_59816	66.04	22.58	25978	CHMP2B
OBS_BC_201192	V2LHS_59816	65.77	19.8	25978	CHMP2B
OBS_BC_201193	V2LHS_67935	87.13	99.91	284355, 348825	TPRX1, TPRXL
OBS_BC_201193	V2LHS_67935	56.51	99.83	284355, 348825	TPRX1, TPRXL
OBS_BC_201195	V2LHS_30636	30.33	17.37	55892	MYNN
OBS_BC_201195	V2LHS_30636	28.87	13.67	55892	MYNN
OBS_BC_201201	V2LHS_70078	58.55	58.21	54471	SMCR7L
OBS_BC_201201	V2LHS_70078	53.31	33.65	54471	SMCR7L
OBS_BC_201203	V2LHS_222899	32.63	40.57	5573	PRKAR1A
OBS_BC_201203	V2LHS_222899	23.53	34.53	5573	PRKAR1A
OBS_BC_201205	V2LHS_72613	41.59	66.85	8115	TCL1A
OBS_BC_201207	V2LHS_114866	24	27.92	-	-
OBS_BC_201207	V2LHS_114866	20.38	17.23	-	-
OBS_BC_201209	V2LHS_58074	30.64	84.94	57403	RAB22A
OBS_BC_201212	V2LHS_27520	24.76	53.79	8518	IKBKAP
OBS_BC_201212	V2LHS_27520	18.75	43.87	8518	IKBKAP
OBS_BC_201217	V2LHS_17373	73.21	65.66	2222	FDFT1
OBS_BC_201218	V2LHS_114808	64.14	74.49	100130354	LOC100130354
OBS_BC_201218	V2LHS_114808	63.62	57.65	100130354	LOC100130354
OBS_BC_201219	V2LHS_86840	20.54	4.9	27328, 83259	PCDH11X, PCDH11Y
OBS_BC_201219	V2LHS_86840	19.09	4.24	27328, 83259	PCDH11X, PCDH11Y
OBS_BC_201221	V2LHS_74495	61.26	65.09	23395	LARS2
OBS_BC_201224	V2LHS_28579	83.15	51.08	9158	FIBP
OBS_BC_201225	V2LHS_59989	63.42	51.27	57161	PELI2
OBS_BC_201227	V2LHS_95009	8.88	21.11	7380	UPK3A
OBS_BC_201230	V2LHS_180181	71.94	74.57	125061	AFMID
OBS_BC_201230	V2LHS_180181	55.06	38.88	125061	AFMID
OBS_BC_201232	V2LHS_89615	57.01	65.23	25784	DGCR12
OBS_BC_201232	V2LHS_89615	55.46	43.03	25784	DGCR12
OBS_BC_201234	V2LHS_86375	74.8	33.87	29781	NCAPH2
OBS_BC_201234	V2LHS_86375	67.53	26.88	29781	NCAPH2
OBS_BC_201238	V2LHS_179230	0.77	1.11	51132, 64115, 83606, 344905, 376940, 440552, 100133315	RNF12, C10orf54, C22orf13, ATP13A5, ZC3H6, LOC440552, LOC100133315
OBS_BC_201239	V2LHS_89145	56.21	81.42	116969	ART5
OBS_BC_201242	V2LHS_174342	82.15	67.21	157680	VPS13B
OBS_BC_201242	V2LHS_174342	73.84	52.51	157680	VPS13B
OBS_BC_201243	V2LHS_130500	92.6	40.52	5129	PCTK3
OBS_BC_201243	V2LHS_130500	75.54	36.19	5129	PCTK3
OBS_BC_201252	V2LHS_173064	49.01	24.79	2259	FGF14
OBS_BC_201252	V2LHS_173064	44.02	14.97	2259	FGF14
OBS_BC_201253	V2LHS_41400	34.25	27.24	9022	CLIC3
OBS_BC_201259	V2LHS_50664	17.07	25.69	152404	IGSF11
OBS_BC_201259	V2LHS_50664	15.95	23.98	152404	IGSF11
OBS_BC_201260	V2LHS_43113	11.33	92.97	23545	ATP6V0A2
OBS_BC_201261	V2LHS_17893	58.91	69.17	2029, 100128203	ENSA, LOC100128203
OBS_BC_201261	V2LHS_17893	52.2	36.74	2029, 100128203	ENSA, LOC100128203
OBS_BC_201266	V2LHS_153666	74.05	49.47	6829	SUPT5H
OBS_BC_201266	V2LHS_153666	67.87	24.55	6829	SUPT5H
OBS_BC_201267	V2LHS_81376	50.8	54.35	56521	DNAJC12
OBS_BC_201267	V2LHS_81376	39.66	31.28	56521	DNAJC12
OBS_BC_201268	V2LHS_132009	67.44	37.88	2852	GPER
OBS_BC_201268	V2LHS_132009	26.05	15.63	2852	GPER
OBS_BC_201274	V2LHS_20000	10.93	73.73	55740	ENAH
OBS_BC_201274	V2LHS_20000	10.69	16.72	55740	ENAH
OBS_BC_201277	V2LHS_95964	13.12	10.02	22839	DLGAP4
OBS_BC_201277	V2LHS_95964	12.28	6.3	22839	DLGAP4
OBS_BC_201281	V2LHS_70107	89.75	45.38	219931	TPCN2
OBS_BC_201281	V2LHS_70107	76.82	23.8	219931	TPCN2
OBS_BC_201282	V2LHS_223990	29.86	11.71	2444	FRK
OBS_BC_201285	V2LHS_202531	97.97	90.52	1654	DDX3X
OBS_BC_201285	V2LHS_202531	90.42	81.76	1654	DDX3X
OBS_BC_201286	V2LHS_113158	3.69	12.63	1352	COX10
OBS_BC_201286	V2LHS_113158	2.58	2.15	1352	COX10
OBS_BC_201287	V2LHS_43502	5.83	7.63	1903	S1PR3
OBS_BC_201289	V2LHS_95822	61.21	33.46	9931	HELZ
OBS_BC_201289	V2LHS_95822	60.24	22.93	9931	HELZ
OBS_BC_201291	V2LHS_19344	92.55	90.34	5650	KLK7
OBS_BC_201291	V2LHS_19344	79.1	39.03	5650	KLK7
OBS_BC_201301	V2LHS_239140	62.33	30.07	23405	DICER1
OBS_BC_201301	V2LHS_239140	55.8	27.59	23405	DICER1
OBS_BC_201302	V2LHS_150366	79.75	95.9	952	CD38
OBS_BC_201302	V2LHS_150366	78.18	84.89	952	CD38
OBS_BC_201304	V2LHS_65158	32.73	26.35	29934	SNX12
OBS_BC_201304	V2LHS_65158	23.22	23.24	29934	SNX12
OBS_BC_201305	V2LHS_61638	2.45	14.65	203107, 286148	LOC203107, DPY19L4
OBS_BC_201305	V2LHS_61638	2.44	12.21	203107, 286148	LOC203107, DPY19L4
OBS_BC_201307	V2LHS_151854	71.22	52.02	4327, 732415	MMP19, LOC732415
OBS_BC_201307	V2LHS_151854	59.45	20.82	4327, 732415	MMP19, LOC732415
OBS_BC_201309	V2LHS_96221	77.54	99.55	6683	SPAST
OBS_BC_201309	V2LHS_96221	75.81	98.94	6683	SPAST
OBS_BC_201314	V2LHS_150683	5.62	3.33	1266	CNN3
OBS_BC_201314	V2LHS_150683	5.3	1.14	1266	CNN3
OBS_BC_201318	V2LHS_87610	83.1	67.54	23169	SLC35D1
OBS_BC_201318	V2LHS_87610	66.87	37.89	23169	SLC35D1
OBS_BC_201320	V2LHS_139031	44.23	82.33	3888	KRT82
OBS_BC_201320	V2LHS_139031	40.18	30.67	3888	KRT82
OBS_BC_201322	V2LHS_171199	51.41	65.22	5890	RAD51L1
OBS_BC_201327	V2LHS_76109	43.22	44.92	4669	NAGLU
OBS_BC_201330	V2LHS_132852	75.74	97.03	526	ATP6V1B2
OBS_BC_201330	V2LHS_132852	65.7	63.37	526	ATP6V1B2
OBS_BC_201332	V2LHS_111968	46.1	63.59	146	ADRA1D
OBS_BC_201333	V2LHS_52037	45.65	24.31	2055	CLN8
OBS_BC_201333	V2LHS_52037	25.19	16.94	2055	CLN8
OBS_BC_201334	V2LHS_113459	72.22	53.83	1740	DLG2
OBS_BC_201334	V2LHS_113459	52.99	53.38	1740	DLG2
OBS_BC_201339	V2LHS_41696	12.27	31.58	283316	CD163L1
OBS_BC_201339	V2LHS_41696	10.95	21.1	283316	CD163L1
OBS_BC_201341	V2LHS_97438	55.17	45.55	51028	VPS36
OBS_BC_201343	V2LHS_215898	27.35	14.5	366	AQP9
OBS_BC_201343	V2LHS_215898	26.15	12.06	366	AQP9
OBS_BC_201345	V2LHS_33633	93.78	81.96	8623	ASMTL
OBS_BC_201345	V2LHS_33633	93.22	51.87	8623	ASMTL
OBS_BC_201347	V2LHS_39060	0.29	3.68	219736	STOX1
OBS_BC_201347	V2LHS_39060	0.05	2.65	219736	STOX1
OBS_BC_201370	V2LHS_179580	78.38	97.24	3082	HGF
OBS_BC_201370	V2LHS_179580	73.19	91.86	3082	HGF
OBS_BC_201376	V2LHS_202093	78.82	32.72	8894	EIF2S2
OBS_BC_201376	V2LHS_202093	51.59	30.71	8894	EIF2S2
OBS_BC_201377	V2LHS_15312	4.81	99.65	25801	GCA
OBS_BC_201377	V2LHS_15312	3.85	98.59	25801	GCA
OBS_BC_201379	V2LHS_113957	52.02	51.17	2357	FPR1
OBS_BC_201380	V2LHS_96315	96.84	80.89	22906	TRAK1
OBS_BC_201381	V2LHS_117266	18.9	11.57	83549	UCK1
OBS_BC_201381	V2LHS_117266	16.6	9.95	83549	UCK1
OBS_BC_201382	V2LHS_92887	29.81	46.36	3273	HRG
OBS_BC_201382	V2LHS_92887	21.74	42.48	3273	HRG
OBS_BC_201385	V2LHS_135982	54.47	56.12	4853	NOTCH2
OBS_BC_201385	V2LHS_135982	50.77	54.05	4853	NOTCH2
OBS_BC_201391	V2LHS_176667	72.45	53.36	3202	HOXA5
OBS_BC_201401	V2LHS_12128	59.23	30.23	646627	LOC646627
OBS_BC_201402	V2LHS_114674	15.06	21.33	27247	NFU1
OBS_BC_201402	V2LHS_114674	14.86	18.09	27247	NFU1
OBS_BC_201409	V2LHS_107284	79.39	40.7	7984, 445328	ARHGEF5, FLJ43692
OBS_BC_201417	V2LHS_170976	85.8	43.26	5789	PTPRD
OBS_BC_201417	V2LHS_170976	59.17	23.64	5789	PTPRD
OBS_BC_201419	V2LHS_92695	93.52	91.23	7507	XPA
OBS_BC_201419	V2LHS_92695	91.22	60.07	7507	XPA
OBS_BC_201421	V2LHS_173585	29.76	21.51	54879	ST7L
OBS_BC_201421	V2LHS_173585	23.18	20.55	54879	ST7L
OBS_BC_201430	V2LHS_81563	32.84	28.54	116984	CENTD1
OBS_BC_201430	V2LHS_81563	21.92	17.28	116984	CENTD1
OBS_BC_201432	V2LHS_238781	95.36	97.04	79586	CHPF
OBS_BC_201432	V2LHS_238781	90.39	92.36	79586	CHPF
OBS_BC_201433	V2LHS_71327	72.01	76.02	9759	HDAC4
OBS_BC_201433	V2LHS_71327	63.39	37.29	9759	HDAC4
OBS_BC_201434	V2LHS_63072	41.97	50.29	3853	KRT6A
OBS_BC_201434	V2LHS_63072	41.76	23.65	3853	KRT6A
OBS_BC_201436	V2LHS_172436	5.5	3.43	8048	CSRP3
OBS_BC_201436	V2LHS_172436	5.05	3.32	8048	CSRP3
OBS_BC_201439	V2LHS_172977	35.37	21.45	2040	STOM
OBS_BC_201439	V2LHS_172977	25.08	16.09	2040	STOM
OBS_BC_201440	V2LHS_90004	66.85	43.75	8123	PAR5
OBS_BC_201440	V2LHS_90004	43.41	20.86	8123	PAR5
OBS_BC_201442	V2LHS_32467	15.97	33.7	6015	RING1
OBS_BC_201442	V2LHS_32467	12.47	23.48	6015	RING1
OBS_BC_201443	V2LHS_138568	44.23	13.19	84290	CAPNS2
OBS_BC_201443	V2LHS_138568	28.92	12.41	84290	CAPNS2
OBS_BC_201445	V2LHS_272506	30.83	98.03	3455	IFNAR2
OBS_BC_201446	V2LHS_218643	89.23	40.77	54879	ST7L
OBS_BC_201446	V2LHS_218643	70.55	34.17	54879	ST7L
OBS_BC_201458	V2LHS_151000	73.48	75.07	1464	CSPG4
OBS_BC_201458	V2LHS_151000	69.16	64.25	1464	CSPG4
OBS_BC_201460	V2LHS_70266	6.07	12.05	10343	PKDREJ
OBS_BC_201460	V2LHS_70266	5.65	11.75	10343	PKDREJ
OBS_BC_201464	V2LHS_192329	92.37	72.35	79184	BRCC3
OBS_BC_201464	V2LHS_192329	74.94	67.2	79184	BRCC3
OBS_BC_201467	V2LHS_252352	36.18	14.03	29086	C19orf62
OBS_BC_201467	V2LHS_252352	32.75	12.15	29086	C19orf62
OBS_BC_201470	V2LHS_170217	4.28	5.52	5427	POLE2
OBS_BC_201470	V2LHS_170217	4.25	1.88	5427	POLE2
OBS_BC_201473	V2LHS_115005	67.91	95.36	51166	AADAT
OBS_BC_201473	V2LHS_115005	60.48	82.04	51166	AADAT
OBS_BC_201474	V2LHS_194207	44.68	36.44	255239	ANKK1
OBS_BC_201474	V2LHS_194207	42.2	28.27	255239	ANKK1
OBS_BC_201475	V2LHS_198745	13.64	32.65	25	ABL1
OBS_BC_201476	V2LHS_95965	69.22	85.97	89795	NAV3
OBS_BC_201477	V2LHS_239333	61.33	26.06	-	-
OBS_BC_201477	V2LHS_239333	22.39	24.87	-	-
OBS_BC_201479	V2LHS_202248	81.31	54.24	5511	PPP1R8
OBS_BC_201479	V2LHS_202248	54.37	49.46	5511	PPP1R8
OBS_BC_201480	V2LHS_94117	98.4	96.05	7366	UGT2B15
OBS_BC_201480	V2LHS_94117	90.51	92.37	7366	UGT2B15
OBS_BC_201481	V2LHS_151443	91.18	70.55	2060	EPS15
OBS_BC_201481	V2LHS_151443	83.98	67.95	2060	EPS15
OBS_BC_201483	V2LHS_225342	49.19	17.92	6696	SPP1
OBS_BC_201485	V2LHS_114293	15.92	24.4	2932	GSK3B
OBS_BC_201485	V2LHS_114293	14.96	24.06	2932	GSK3B
OBS_BC_201486	V2LHS_113602	58.2	77.83	1896	EDA
OBS_BC_201486	V2LHS_113602	40.54	55.66	1896	EDA
OBS_BC_201488	V2LHS_204125	92.87	85.23	6302	TSPAN31
OBS_BC_201488	V2LHS_204125	88.41	82.26	6302	TSPAN31
OBS_BC_201489	V2LHS_91514	64.72	54.28	11329	STK38
OBS_BC_201489	V2LHS_91514	56.71	46.14	11329	STK38
OBS_BC_201492	V2LHS_202888	75.44	90.03	23235	SNF1LK2
OBS_BC_201492	V2LHS_202888	52.6	60.06	23235	SNF1LK2
OBS_BC_201493	V2LHS_49547	15.31	25.12	3240, 3250	HP, HPR
OBS_BC_201494	V2LHS_267106	71.86	83.76	2272	FHIT
OBS_BC_201494	V2LHS_267106	63.14	40.16	2272	FHIT
OBS_BC_201497	V2LHS_175666	67.1	63.12	55833	UBAP2
OBS_BC_201497	V2LHS_175666	64.61	60.56	55833	UBAP2
OBS_BC_201498	V2LHS_78722	47.88	52.81	84239	ATP13A4
OBS_BC_201498	V2LHS_78722	38.72	43.22	84239	ATP13A4
OBS_BC_201502	V2LHS_189762	74.64	85.94	6660	SOX5
OBS_BC_201502	V2LHS_189762	65.88	75.25	6660	SOX5
OBS_BC_201513	V2LHS_153625	36.09	32.8	6198	RPS6KB1
OBS_BC_201513	V2LHS_153625	29.28	16.55	6198	RPS6KB1
OBS_BC_201514	V2LHS_80185	19.16	59.65	23336	DMN
OBS_BC_201514	V2LHS_80185	18.45	34.58	23336	DMN
OBS_BC_201516	V2LHS_175088	21.67	47.95	55312	RFK
OBS_BC_201516	V2LHS_175088	21.56	15	55312	RFK
OBS_BC_201522	V2LHS_30627	27.92	97.31	11072	DUSP14
OBS_BC_201522	V2LHS_30627	25.9	83.35	11072	DUSP14
OBS_BC_201524	V2LHS_123009	98.21	85.04	170692	ADAMTS18
OBS_BC_201524	V2LHS_123009	64.67	65.89	170692	ADAMTS18
OBS_BC_201526	V2LHS_173502	39.55	19.98	54870	QRICH1
OBS_BC_201526	V2LHS_173502	33.48	15.26	54870	QRICH1
OBS_BC_201532	V2LHS_168763	31.59	32.4	25847	ANAPC13
OBS_BC_201532	V2LHS_168763	30.86	21.97	25847	ANAPC13
OBS_BC_201533	V2LHS_52904	49.13	68.51	8871	SYNJ2
OBS_BC_201534	V2LHS_171844	82.81	77.27	7368	UGT8
OBS_BC_201534	V2LHS_171844	70.84	60.98	7368	UGT8
OBS_BC_201535	V2LHS_131754	62.43	29.99	2294	FOXF1
OBS_BC_201535	V2LHS_131754	58.51	24.07	2294	FOXF1
OBS_BC_201536	V2LHS_26591	61.86	78.93	55532	SLC30A10
OBS_BC_201536	V2LHS_26591	54.09	61.59	55532	SLC30A10
OBS_BC_201538	V2LHS_139276	33.5	25.2	257218	SHPRH
OBS_BC_201538	V2LHS_139276	22.28	12.23	257218	SHPRH
OBS_BC_201539	V2LHS_139450	7.29	99.18	58517	RBM25
OBS_BC_201539	V2LHS_139450	6.71	99.07	58517	RBM25
OBS_BC_201540	V2LHS_207558	14.58	95.43	11315	PARK7
OBS_BC_201544	V2LHS_76046	95.25	78.68	4830, 654364	NME1, NME1-NME2
OBS_BC_201544	V2LHS_76046	91.72	74.78	4830, 654364	NME1, NME1-NME2
OBS_BC_201547	V2LHS_112971	38.12	59.23	1105	CHD1
OBS_BC_201547	V2LHS_112971	36.11	54.44	1105	CHD1
OBS_BC_201551	V2LHS_202452	87.8	72.69	5511	PPP1R8
OBS_BC_201551	V2LHS_202452	76.17	62.28	5511	PPP1R8
OBS_BC_201556	V2LHS_228369	45.07	7.56	2014	EMP3
OBS_BC_201556	V2LHS_228369	34.14	6.03	2014	EMP3
OBS_BC_201557	V2LHS_113166	24.57	99.61	1362	CPD
OBS_BC_201557	V2LHS_113166	20.27	99.31	1362	CPD
OBS_BC_201561	V2LHS_201952	81.32	50.36	63979	FIGNL1
OBS_BC_201561	V2LHS_201952	73.79	49.66	63979	FIGNL1
OBS_BC_201562	V2LHS_34056	66.64	60.52	4744	NEFH
OBS_BC_201562	V2LHS_34056	27.34	48.85	4744	NEFH
OBS_BC_201563	V2LHS_92909	81.72	69.71	3459	IFNGR1
OBS_BC_201567	V2LHS_197525	25.99	22.41	10988	METAP2
OBS_BC_201568	V2LHS_131397	20.11	7.26	5431	POLR2B
OBS_BC_201571	V2LHS_131652	68.73	77.8	6158	RPL28
OBS_BC_201571	V2LHS_131652	68.72	39.86	6158	RPL28
OBS_BC_201573	V2LHS_19008	58.89	89.49	147184	TMEM99
OBS_BC_201573	V2LHS_19008	47.1	77.21	147184	TMEM99
OBS_BC_201590	V2LHS_203106	97.1	70.68	7323, 100128647	UBE2D3, UBE2D3P
OBS_BC_201590	V2LHS_203106	79.67	66.04	7323, 100128647	UBE2D3, UBE2D3P
OBS_BC_201593	V2LHS_272880	38.19	30.53	55999	NXF4
OBS_BC_201593	V2LHS_272880	34.43	18.84	55999	NXF4
OBS_BC_201599	V2LHS_225786	40.59	34.6	1717	DHCR7
OBS_BC_201599	V2LHS_225786	13.96	23.24	1717	DHCR7
OBS_BC_201600	V2LHS_111239	63.03	61.01	-	-
OBS_BC_201602	V2LHS_154447	8	6.35	55554	KLK15
OBS_BC_201602	V2LHS_154447	7.43	6.19	55554	KLK15
OBS_BC_201606	V2LHS_246821	27.84	22.16	3848	KRT1
OBS_BC_201606	V2LHS_246821	27.84	11.81	3848	KRT1
OBS_BC_201609	V2LHS_31580	95.5	94.83	6332	SCN7A
OBS_BC_201609	V2LHS_31580	87.97	89.44	6332	SCN7A
OBS_BC_201611	V2LHS_245030	35.75	38.79	6911	TBX6
OBS_BC_201611	V2LHS_245030	24.12	30.51	6911	TBX6
OBS_BC_201612	V2LHS_47274	16.3	11.29	8936	WASF1
OBS_BC_201612	V2LHS_47274	13.67	9.85	8936	WASF1
OBS_BC_201613	V2LHS_216293	1.76	42.45	197021	LCTL
OBS_BC_201616	V2LHS_207159	47.8	70.36	1175	AP2S1
OBS_BC_201618	V2LHS_43925	56.56	90.18	24138	IFIT5
OBS_BC_201618	V2LHS_43925	54.66	87.06	24138	IFIT5
OBS_BC_201619	V2LHS_115229	27.47	26.6	10110	SGK2
OBS_BC_201619	V2LHS_115229	23.24	24.05	10110	SGK2
OBS_BC_201620	V2LHS_203435	81.03	61.81	26027	ACOT11
OBS_BC_201620	V2LHS_203435	77.47	59.54	26027	ACOT11
OBS_BC_201623	V2LHS_19057	38.94	23.77	5929	RBBP5
OBS_BC_201624	V2LHS_71341	75.33	59.99	4289	MKLN1
OBS_BC_201624	V2LHS_71341	32.85	27.68	4289	MKLN1
OBS_BC_201628	V2LHS_24033	26.75	38.96	1611	DAP
OBS_BC_201628	V2LHS_24033	25.78	20.64	1611	DAP
OBS_BC_201632	V2LHS_149714	82.16	75.94	11052	CPSF6
OBS_BC_201632	V2LHS_149714	72.98	67.69	11052	CPSF6
OBS_BC_201634	V2LHS_201791	94.57	84.25	164	AP1G1
OBS_BC_201634	V2LHS_201791	77.91	68.58	164	AP1G1
OBS_BC_201636	V2LHS_31045	55.53	88.56	6367	CCL22
OBS_BC_201636	V2LHS_31045	41.99	53.93	6367	CCL22
OBS_BC_201642	V2LHS_63421	17.55	10.14	3621	ING1
OBS_BC_201647	V2LHS_48872	41.98	61.06	26258	PLDN
OBS_BC_201647	V2LHS_48872	41.03	45.78	26258	PLDN
OBS_BC_201649	V2LHS_201780	71.92	52.54	85443	DCLK3
OBS_BC_201649	V2LHS_201780	65.12	34.42	85443	DCLK3
OBS_BC_201651	V2LHS_202535	96.55	70.84	558	AXL
OBS_BC_201651	V2LHS_202535	92.52	68.52	558	AXL
OBS_BC_201652	V2LHS_18795	16.64	97.07	1746	DLX2
OBS_BC_201652	V2LHS_18795	14.45	94.5	1746	DLX2
OBS_BC_201653	V2LHS_202321	71.14	55.05	3980	LIG3
OBS_BC_201653	V2LHS_202321	54.76	33.05	3980	LIG3
OBS_BC_201654	V2LHS_91409	84.88	83.58	11338	U2AF2
OBS_BC_201654	V2LHS_91409	84.03	83.29	11338	U2AF2
OBS_BC_201660	V2LHS_115707	46.79	42.52	51497	TH1L
OBS_BC_201660	V2LHS_115707	42.91	22.39	51497	TH1L
OBS_BC_201665	V2LHS_91010	74.18	74.6	10791	VAMP5
OBS_BC_201665	V2LHS_91010	68.46	57.26	10791	VAMP5
OBS_BC_201666	V2LHS_30988	57.6	36.23	6372	CXCL6
OBS_BC_201666	V2LHS_30988	52.76	26.69	6372	CXCL6
OBS_BC_201668	V2LHS_200873	50.29	25.34	57515	SERINC1
OBS_BC_201670	V2LHS_69732	74.81	77.66	152831	KLB
OBS_BC_201670	V2LHS_69732	64.42	43.55	152831	KLB
OBS_BC_201672	V2LHS_115016	24.72	97.87	51167	CYB5R4
OBS_BC_201672	V2LHS_115016	22.63	96.34	51167	CYB5R4
OBS_BC_201678	V2LHS_195191	85.57	94.45	10517, 374286, 100133998	FBXW10, CDRT1, LOC100133998
OBS_BC_201678	V2LHS_195191	67.08	94.04	10517, 374286, 100133998	FBXW10, CDRT1, LOC100133998
OBS_BC_201680	V2LHS_236559	34.45	8.63	51283	BFAR
OBS_BC_201680	V2LHS_236559	21.49	7.43	51283	BFAR
OBS_BC_201682	V2LHS_24946	39.89	55.85	9994	CASP8AP2
OBS_BC_201682	V2LHS_24946	27.02	5.31	9994	CASP8AP2
OBS_BC_201685	V2LHS_85999	37.74	98.96	22823	MTF2
OBS_BC_201685	V2LHS_85999	37.73	94.12	22823	MTF2
OBS_BC_201686	V2LHS_32195	65.3	42.55	6091, 642132	ROBO1, LOC642132
OBS_BC_201686	V2LHS_32195	58.58	32.35	6091, 642132	ROBO1, LOC642132
OBS_BC_201687	V2LHS_44427	2.43	0.31	166379	BBS12
OBS_BC_201690	V2LHS_152423	9.47	34.21	4950	OCLN
OBS_BC_201690	V2LHS_152423	9.24	18.72	4950	OCLN
OBS_BC_201691	V2LHS_41326	46.85	72.89	9064	MAP3K6
OBS_BC_201692	V2LHS_77666	42.25	75.85	57198	ATP8B2
OBS_BC_201692	V2LHS_77666	34.35	52.03	57198	ATP8B2
OBS_BC_201693	V2LHS_138975	6.53	9.88	84467	FBN3
OBS_BC_201693	V2LHS_138975	6.38	3.9	84467	FBN3
OBS_BC_201696	V2LHS_18771	74.95	81.52	24140	FTSJ1
OBS_BC_201696	V2LHS_18771	72.72	61.21	24140	FTSJ1
OBS_BC_201698	V2LHS_201644	36.39	44.58	1488, 642909	CTBP2, LOC642909
OBS_BC_201699	V2LHS_24526	5.12	1.44	1070	CETN3
OBS_BC_201699	V2LHS_24526	5.01	0.75	1070	CETN3
OBS_BC_201703	V2LHS_200579	91.96	86.78	23047	PDS5B
OBS_BC_201703	V2LHS_200579	74.58	72.42	23047	PDS5B
OBS_BC_201704	V2LHS_242472	73.12	83.82	8693	GALNT4
OBS_BC_201704	V2LHS_242472	66.66	78.98	8693	GALNT4
OBS_BC_201708	V2LHS_44074	53.07	88.76	26207	PITPNC1
OBS_BC_201708	V2LHS_44074	47.45	75.39	26207	PITPNC1
OBS_BC_201709	V2LHS_266951	97.66	94.13	2012	EMP1
OBS_BC_201713	V2LHS_58330	77.34	68.56	30815	ST6GALNAC6
OBS_BC_201713	V2LHS_58330	66.93	60.04	30815	ST6GALNAC6
OBS_BC_201719	V2LHS_68507	53.6	62.17	83540	NUF2
OBS_BC_201719	V2LHS_68507	38.33	46.28	83540	NUF2
OBS_BC_201720	V2LHS_242988	17.75	16.42	1314	COPA
OBS_BC_201720	V2LHS_242988	15.47	11.56	1314	COPA
OBS_BC_201723	V2LHS_97473	13.02	12.35	51654	CDK5RAP1
OBS_BC_201723	V2LHS_97473	12.34	11.16	51654	CDK5RAP1
OBS_BC_201726	V2LHS_19612	35.02	84.65	5481	PPID
OBS_BC_201727	V2LHS_197119	11.34	29.85	39	ACAT2
OBS_BC_201727	V2LHS_197119	8.95	13.94	39	ACAT2
OBS_BC_201730	V2LHS_75169	96.14	90.96	23357	ANGEL1
OBS_BC_201730	V2LHS_75169	85.11	88.6	23357	ANGEL1
OBS_BC_201731	V2LHS_215575	98.33	72.79	4515	MTCP1
OBS_BC_201731	V2LHS_215575	79.05	67.42	4515	MTCP1
OBS_BC_201732	V2LHS_196539	83.01	75.34	23467	NPTXR
OBS_BC_201732	V2LHS_196539	73.81	60.02	23467	NPTXR
OBS_BC_201735	V2LHS_131607	8.64	6.51	6143	RPL19
OBS_BC_201735	V2LHS_131607	8.22	3.18	6143	RPL19
OBS_BC_201736	V2LHS_116657	35.63	33.72	81539	SLC38A1
OBS_BC_201736	V2LHS_116657	35.18	26.96	81539	SLC38A1
OBS_BC_201740	V2LHS_135219	36.83	25.81	51308	REEP2
OBS_BC_201740	V2LHS_135219	29.43	20.09	51308	REEP2
OBS_BC_201741	V2LHS_158268	12.16	33.03	79931	TNIP3
OBS_BC_201747	V2LHS_212051	65.64	29.23	5813	PURA
OBS_BC_201749	V2LHS_78529	34.03	20.78	5569	PKIA
OBS_BC_201749	V2LHS_78529	26.52	17.76	5569	PKIA
OBS_BC_201750	V2LHS_197654	79.47	89.46	10111	RAD50
OBS_BC_201752	V2LHS_41244	4.79	7.55	9082, 353515	XKRY, XKRY2
OBS_BC_201752	V2LHS_41244	4.42	4.1	9082, 353515	XKRY, XKRY2
OBS_BC_201754	V2LHS_150685	80.87	80.43	1266	CNN3
OBS_BC_201754	V2LHS_150685	74.72	74.63	1266	CNN3
OBS_BC_201760	V2LHS_199794	71.15	79.48	6502	SKP2
OBS_BC_201760	V2LHS_199794	59.92	72.12	6502	SKP2
OBS_BC_201761	V2LHS_45018	34.41	49.16	56996	SLC12A9
OBS_BC_201761	V2LHS_45018	30.65	47.39	56996	SLC12A9
OBS_BC_201770	V2LHS_36238	3.03	5.51	9223	MAGI1
OBS_BC_201770	V2LHS_36238	2.3	4.93	9223	MAGI1
OBS_BC_201773	V2LHS_18484	7.51	10.47	6568	SLC17A1
OBS_BC_201773	V2LHS_18484	7.32	5.67	6568	SLC17A1
OBS_BC_201780	V2LHS_195886	25.43	41.53	64395	GMCL1
OBS_BC_201781	V2LHS_90129	74.19	71.02	10903	MTMR11
OBS_BC_201781	V2LHS_90129	72.24	45.84	10903	MTMR11
OBS_BC_201789	V2LHS_87171	12.61	74.31	23212	RRS1
OBS_BC_201789	V2LHS_87171	12.57	42.37	23212	RRS1
OBS_BC_201799	V2LHS_112442	36.12	77.34	1557, 1559	CYP2C19, CYP2C9
OBS_BC_201805	V2LHS_208850	98.15	66.43	149830	PRNT
OBS_BC_201806	V2LHS_216509	64.25	4.87	11319	ECD
OBS_BC_201806	V2LHS_216509	59.6	4.37	11319	ECD
OBS_BC_201807	V2LHS_46732	64.8	96.59	9040, 606551, 100133517	UBE2M, UBE2MP1, LOC100133517
OBS_BC_201807	V2LHS_46732	59.79	95.79	9040, 606551, 100133517	UBE2M, UBE2MP1, LOC100133517
OBS_BC_201810	V2LHS_16535	77.52	82.92	8818	DPM2
OBS_BC_201810	V2LHS_16535	65.9	66.61	8818	DPM2
OBS_BC_201811	V2LHS_130899	1.05	2.47	2915	GRM5
OBS_BC_201811	V2LHS_130899	0.81	1.31	2915	GRM5
OBS_BC_201813	V2LHS_76361	77.57	56.3	4534	MTM1
OBS_BC_201814	V2LHS_32690	42.51	74.22	5996	RGS1
OBS_BC_201814	V2LHS_32690	36.75	34.71	5996	RGS1
OBS_BC_201818	V2LHS_250755	45.48	5.02	57617	VPS18
OBS_BC_201818	V2LHS_250755	20.29	3.28	57617	VPS18
OBS_BC_201820	V2LHS_117767	10.92	4.07	4660	PPP1R12B
OBS_BC_201820	V2LHS_117767	10.85	2.45	4660	PPP1R12B
OBS_BC_201824	V2LHS_114422	31.79	53.1	26127	FGFR1OP2
OBS_BC_201825	V2LHS_201823	23.81	15.15	23405	DICER1
OBS_BC_201829	V2LHS_274151	61.07	34.82	80150	ASRGL1
OBS_BC_201829	V2LHS_274151	39.1	11.41	80150	ASRGL1
OBS_BC_201847	V2LHS_133846	82.41	98.75	3899	AFF3
OBS_BC_201847	V2LHS_133846	79.17	98.18	3899	AFF3
OBS_BC_201848	V2LHS_114219	52.24	62.96	2806	GOT2
OBS_BC_201848	V2LHS_114219	41.91	35.05	2806	GOT2
OBS_BC_201850	V2LHS_18483	82.79	80.23	6568	SLC17A1
OBS_BC_201850	V2LHS_18483	75.97	75.76	6568	SLC17A1
OBS_BC_201851	V2LHS_58415	47.72	52.18	5300	PIN1
OBS_BC_201851	V2LHS_58415	34.23	52.09	5300	PIN1
OBS_BC_201854	V2LHS_198579	26.46	17.77	10096	ACTR3
OBS_BC_201854	V2LHS_198579	24.14	10.69	10096	ACTR3
OBS_BC_201855	V2LHS_115769	91.34	91.77	4771	NF2
OBS_BC_201855	V2LHS_115769	90.59	82.47	4771	NF2
OBS_BC_201858	V2LHS_78764	34.02	36.04	10957	PNRC1
OBS_BC_201858	V2LHS_78764	27.19	29.66	10957	PNRC1
OBS_BC_201859	V2LHS_241156	9.52	15.05	6303	SAT1
OBS_BC_201859	V2LHS_241156	8.02	14.99	6303	SAT1
OBS_BC_201862	V2LHS_250698	97.34	68.4	4144	MAT2A
OBS_BC_201862	V2LHS_250698	73.61	49.45	4144	MAT2A
OBS_BC_201866	V2LHS_84920	46.62	46.05	4174	MCM5
OBS_BC_201875	V2LHS_111536	11.1	21.85	2638	GC
OBS_BC_201875	V2LHS_111536	6	3.6	2638	GC
OBS_BC_201878	V2LHS_170319	5.6	10.61	5506	PPP1R3A
OBS_BC_201879	V2LHS_154228	75.72	74.26	50940	PDE11A
OBS_BC_201879	V2LHS_154228	71.96	72.63	50940	PDE11A
OBS_BC_201881	V2LHS_151830	99.56	94.74	4317	MMP8
OBS_BC_201881	V2LHS_151830	95.78	54.09	4317	MMP8
OBS_BC_201883	V2LHS_118231	80.66	82.08	115701	ALPK2
OBS_BC_201883	V2LHS_118231	79.79	76.7	115701	ALPK2
OBS_BC_201884	V2LHS_118008	76.25	73.02	84107	ZIC4
OBS_BC_201885	V2LHS_191285	78.38	89.53	1378, 1379	CR1, CR1L
OBS_BC_201885	V2LHS_191285	70.63	74.43	1378, 1379	CR1, CR1L
OBS_BC_201887	V2LHS_197942	68.66	41.48	27121	DKK4
OBS_BC_201887	V2LHS_197942	59.63	34.12	27121	DKK4
OBS_BC_201895	V2LHS_200176	58.41	23.12	63904	DUSP21
OBS_BC_201896	V2LHS_82930	54.25	84.35	10129	FRY
OBS_BC_201896	V2LHS_82930	44.58	82.63	10129	FRY
OBS_BC_201901	V2LHS_113076	39.59	51.49	1192	CLIC1
OBS_BC_201901	V2LHS_113076	38.52	51.41	1192	CLIC1
OBS_BC_201903	V2LHS_63644	49.13	67.83	3338	DNAJC4
OBS_BC_201904	V2LHS_181629	13.65	17.72	6207, 729236	RPS13, LOC729236
OBS_BC_201904	V2LHS_181629	12.91	15.32	6207, 729236	RPS13, LOC729236
OBS_BC_201907	V2LHS_241751	6.37	98.84	5094	PCBP2
OBS_BC_201907	V2LHS_241751	5.77	98.83	5094	PCBP2
OBS_BC_201910	V2LHS_131729	1.55	7.51	2196	FAT2
OBS_BC_201910	V2LHS_131729	0.75	4.1	2196	FAT2
OBS_BC_201911	V2LHS_212090	91.31	51.89	23122	CLASP2
OBS_BC_201911	V2LHS_212090	90.86	43.81	23122	CLASP2
OBS_BC_201912	V2LHS_224112	21.26	27.81	116093	DIRC1
OBS_BC_201912	V2LHS_224112	15.51	16.12	116093	DIRC1
OBS_BC_201916	V2LHS_199490	54.16	62.14	11309	SLCO2B1
OBS_BC_201923	V2LHS_17765	36.78	27.11	2049	EPHB3
OBS_BC_201923	V2LHS_17765	36.21	23.14	2049	EPHB3
OBS_BC_201924	V2LHS_198098	33.07	21.69	10295	BCKDK
OBS_BC_201928	V2LHS_239782	88.89	79.66	6050	RNH1
OBS_BC_201928	V2LHS_239782	88.34	74.88	6050	RNH1
OBS_BC_201929	V2LHS_68748	91.39	49.55	9404	LPXN
OBS_BC_201929	V2LHS_68748	69.29	45.25	9404	LPXN
OBS_BC_201935	V2LHS_14735	56.42	99.73	1048	CEACAM5
OBS_BC_201935	V2LHS_14735	33.81	99.51	1048	CEACAM5
OBS_BC_201941	V2LHS_262029	27.01	52.84	51614	ERGIC3
OBS_BC_201941	V2LHS_262029	23.96	20.48	51614	ERGIC3
OBS_BC_201943	V2LHS_202898	97.27	92.61	3980	LIG3
OBS_BC_201943	V2LHS_202898	93.01	73.28	3980	LIG3
OBS_BC_201944	V2LHS_228809	16.93	19.71	6948	TCN2
OBS_BC_201944	V2LHS_228809	13.31	16.35	6948	TCN2
OBS_BC_201945	V2LHS_73955	50.44	46.82	60560	MAK10
OBS_BC_201950	V2LHS_87539	3.44	5.12	23173	METAP1
OBS_BC_201950	V2LHS_87539	2.91	4.84	23173	METAP1
OBS_BC_201951	V2LHS_199215	90.01	89.15	11194	ABCB8
OBS_BC_201951	V2LHS_199215	83.66	79.49	11194	ABCB8
OBS_BC_201952	V2LHS_48742	4.58	45.39	474	ATOH1
OBS_BC_201952	V2LHS_48742	4.3	14.68	474	ATOH1
OBS_BC_201954	V2LHS_114982	62.47	53.26	51428	DDX41
OBS_BC_201954	V2LHS_114982	53.74	45.08	51428	DDX41
OBS_BC_201957	V2LHS_224094	88.01	51.19	390259	BSX
OBS_BC_201960	V2LHS_227752	93.1	81.13	1809	DPYSL3
OBS_BC_201960	V2LHS_227752	73.12	58.34	1809	DPYSL3
OBS_BC_201961	V2LHS_43874	74.45	53.34	85442	KNDC1
OBS_BC_201961	V2LHS_43874	28.68	44.61	85442	KNDC1
OBS_BC_201966	V2LHS_42515	34.69	40.6	6991	TCTE3
OBS_BC_201966	V2LHS_42515	34.42	37.15	6991	TCTE3
OBS_BC_201970	V2LHS_264956	96.43	61.42	142679	DUSP19
OBS_BC_201970	V2LHS_264956	85.52	58.96	142679	DUSP19
OBS_BC_201974	V2LHS_231372	99.49	95.92	22876	INPP5F
OBS_BC_201974	V2LHS_231372	98.6	89.83	22876	INPP5F
OBS_BC_201978	V2LHS_203202	35.34	46.92	65267	WNK3
OBS_BC_201978	V2LHS_203202	34.6	24.32	65267	WNK3
OBS_BC_201979	V2LHS_85492	68.19	67.97	10926	DBF4
OBS_BC_201979	V2LHS_85492	45.19	66.75	10926	DBF4
OBS_BC_201982	V2LHS_130344	22.18	20.14	120329	CASP12
OBS_BC_201982	V2LHS_130344	20.78	14.15	120329	CASP12
OBS_BC_201984	V2LHS_133504	0.63	4.99	3698	ITIH2
OBS_BC_201985	V2LHS_170815	20.45	62.41	5710, 266971, 100101438	PSMD4, PIPSL, LOC100101438
OBS_BC_201985	V2LHS_170815	17.39	53.37	5710, 266971, 100101438	PSMD4, PIPSL, LOC100101438
OBS_BC_201990	V2LHS_177239	52.21	49.73	84803	AGPAT9
OBS_BC_201992	V2LHS_153102	95.61	75.93	6585	SLIT1
OBS_BC_201992	V2LHS_153102	81.91	65.16	6585	SLIT1
OBS_BC_201994	V2LHS_22051	72.39	99.45	7095	SEC62
OBS_BC_201994	V2LHS_22051	39.91	96.96	7095	SEC62
OBS_BC_201995	V2LHS_60661	92.44	73.29	3628	INPP1
OBS_BC_201995	V2LHS_60661	90.34	61.31	3628	INPP1
OBS_BC_201996	V2LHS_150607	99.22	89.99	1163	CKS1B
OBS_BC_201996	V2LHS_150607	84.41	89.25	1163	CKS1B
OBS_BC_201998	V2LHS_111493	15.64	26.09	3586	IL10
OBS_BC_201998	V2LHS_111493	14.62	23.89	3586	IL10
OBS_BC_201999	V2LHS_170351	96.7	32.18	5527	PPP2R5C
OBS_BC_201999	V2LHS_170351	81.41	32.11	5527	PPP2R5C
OBS_BC_202003	V2LHS_24733	84.54	73.59	-	-
OBS_BC_202003	V2LHS_24733	80.14	64.41	-	-
OBS_BC_202010	V2LHS_203436	91.45	93.64	5810	RAD1
OBS_BC_202010	V2LHS_203436	67.75	90.81	5810	RAD1
OBS_BC_202011	V2LHS_130913	22.71	12.81	2918	GRM8
OBS_BC_202011	V2LHS_130913	15.37	10.44	2918	GRM8
OBS_BC_202014	V2LHS_197703	79.1	74.14	11269	DDX19B
OBS_BC_202014	V2LHS_197703	71.41	72.32	11269	DDX19B
OBS_BC_202016	V2LHS_225517	19.59	17.47	3562	IL3
OBS_BC_202016	V2LHS_225517	12.73	7.9	3562	IL3
OBS_BC_202024	V2LHS_72952	23.26	64.21	2998	GYS2
OBS_BC_202025	V2LHS_63121	45.62	48.12	3831	KLC1
OBS_BC_202025	V2LHS_63121	35.26	21.48	3831	KLC1
OBS_BC_202031	V2LHS_26058	27.24	18.59	-	-
OBS_BC_202031	V2LHS_26058	25.93	13.23	-	-
OBS_BC_202033	V2LHS_115654	2.77	7.18	-	-
OBS_BC_202033	V2LHS_115654	2.41	2.36	-	-
OBS_BC_202035	V2LHS_56404	44.38	29.1	7444	VRK2
OBS_BC_202037	V2LHS_134623	14.56	13.77	51086	TNNI3K
OBS_BC_202039	V2LHS_33003	37.77	39.39	8411	EEA1
OBS_BC_202039	V2LHS_33003	27.21	29.31	8411	EEA1
OBS_BC_202041	V2LHS_218173	49.19	97.36	900	CCNG1
OBS_BC_202041	V2LHS_218173	48.75	96.94	900	CCNG1
OBS_BC_202046	V2LHS_115014	23.91	36.21	51167	CYB5R4
OBS_BC_202046	V2LHS_115014	20.49	25.03	51167	CYB5R4
OBS_BC_202050	V2LHS_116488	17.82	26.27	79094	CHAC1
OBS_BC_202050	V2LHS_116488	14.83	11.34	79094	CHAC1
OBS_BC_202053	V2LHS_197422	28.9	41.87	10528	NOL5A
OBS_BC_202054	V2LHS_228400	43.75	43.31	1105	CHD1
OBS_BC_202060	V2LHS_59012	40.07	47.04	5144	PDE4D
OBS_BC_202061	V2LHS_93754	48.36	63.98	6189, 146053, 439992, 643932, 652670, 729150, 729510, 730993, 731260, 731542, 100129742	RPS3A, LOC146053, LOC439992, LOC643932, LOC652670, LOC729150, LOC729510, LOC730993, LOC731260, LOC731542, LOC100129742
OBS_BC_202061	V2LHS_93754	39.62	43.44	6189, 146053, 439992, 643932, 652670, 729150, 729510, 730993, 731260, 731542, 100129742	RPS3A, LOC146053, LOC439992, LOC643932, LOC652670, LOC729150, LOC729510, LOC730993, LOC731260, LOC731542, LOC100129742
OBS_BC_202063	V2LHS_239070	81.8	92.32	127933	UHMK1
OBS_BC_202063	V2LHS_239070	80.99	85.19	127933	UHMK1
OBS_BC_202066	V2LHS_115547	24.07	58.86	51202	DDX47
OBS_BC_202066	V2LHS_115547	21.71	55.76	51202	DDX47
OBS_BC_202068	V2LHS_111815	86.93	80.29	3577	IL8RA
OBS_BC_202068	V2LHS_111815	78.2	63.94	3577	IL8RA
OBS_BC_202071	V2LHS_112839	49.55	19.74	956	ENTPD3
OBS_BC_202071	V2LHS_112839	42.23	15.92	956	ENTPD3
OBS_BC_202072	V2LHS_94212	51.71	46.93	47	ACLY
OBS_BC_202072	V2LHS_94212	33.72	38.26	47	ACLY
OBS_BC_202073	V2LHS_153458	3.86	5.39	6713	SQLE
OBS_BC_202073	V2LHS_153458	3.84	2.18	6713	SQLE
OBS_BC_202079	V2LHS_203112	78.61	52.3	6500, 6922	SKP1, TCEB1P
OBS_BC_202079	V2LHS_203112	54.15	28.5	6500, 6922	SKP1, TCEB1P
OBS_BC_202082	V2LHS_62585	35.87	59.26	4016	LOXL1
OBS_BC_202083	V2LHS_41196	53.8	53.04	9084, 51481, 353513, 652821	VCY, VCX3A, VCY1B, LOC652821
OBS_BC_202085	V2LHS_192511	63.82	39.17	6950, 400013	TCP1, LOC400013
OBS_BC_202085	V2LHS_192511	59.15	25.96	6950, 400013	TCP1, LOC400013
OBS_BC_202087	V2LHS_65543	44.77	89.89	10404	PGCP
OBS_BC_202087	V2LHS_65543	41.22	84.83	10404	PGCP
OBS_BC_202089	V2LHS_91398	46.61	85.17	27329	ANGPTL3
OBS_BC_202089	V2LHS_91398	45.6	51.31	27329	ANGPTL3
OBS_BC_202093	V2LHS_143608	47.84	29.72	344148	NAP5
OBS_BC_202096	V2LHS_201759	87.81	90.24	7013, 646316, 648283	TERF1, LOC646316, LOC648283
OBS_BC_202096	V2LHS_201759	31.96	89.98	7013, 646316, 648283	TERF1, LOC646316, LOC648283
OBS_BC_202098	V2LHS_115396	6.6	90.77	51455	REV1
OBS_BC_202098	V2LHS_115396	6.43	11.83	51455	REV1
OBS_BC_202100	V2LHS_157878	79.15	95.47	79858	NEK11
OBS_BC_202100	V2LHS_157878	68.69	94.77	79858	NEK11
OBS_BC_202102	V2LHS_90636	2.54	4.55	10857	PGRMC1
OBS_BC_202103	V2LHS_176718	1.36	2.82	54566	EPB41L4B
OBS_BC_202105	V2LHS_112928	14.17	35.22	1040	CDS1
OBS_BC_202105	V2LHS_112928	13.7	18.98	1040	CDS1
OBS_BC_202107	V2LHS_171471	91.17	49.01	7164	TPD52L1
OBS_BC_202107	V2LHS_171471	68.4	47.26	7164	TPD52L1
OBS_BC_202109	V2LHS_72548	68.47	42.57	8293, 728492	SERF1A, SERF1B
OBS_BC_202109	V2LHS_72548	50.17	31.65	8293, 728492	SERF1A, SERF1B
OBS_BC_202110	V2LHS_222651	97.96	93.57	283596	SNHG10
OBS_BC_202110	V2LHS_222651	97.72	61.6	283596	SNHG10
OBS_BC_202115	V2LHS_196409	72.43	86.98	11262	SP140
OBS_BC_202115	V2LHS_196409	70.15	83.24	11262	SP140
OBS_BC_202117	V2LHS_92740	40.55	77.15	846	CASR
OBS_BC_202118	V2LHS_111861	86.03	55.58	1231, 729230	CCR2, FLJ78302
OBS_BC_202118	V2LHS_111861	52.67	47.43	1231, 729230	CCR2, FLJ78302
OBS_BC_202119	V2LHS_199476	71.39	78.95	5922	RASA2
OBS_BC_202122	V2LHS_113427	20.35	9.73	1666	DECR1
OBS_BC_202122	V2LHS_113427	15.22	9.16	1666	DECR1
OBS_BC_202125	V2LHS_253909	68.58	24.16	10121	ACTR1A
OBS_BC_202138	V2LHS_37438	88.67	44.14	3309	HSPA5
OBS_BC_202138	V2LHS_37438	50.86	20.33	3309	HSPA5
OBS_BC_202140	V2LHS_202737	87.22	83.07	6500	SKP1
OBS_BC_202140	V2LHS_202737	80.15	78.35	6500	SKP1
OBS_BC_202146	V2LHS_203120	62.35	32.79	26273	FBXO3
OBS_BC_202146	V2LHS_203120	59.9	25.33	26273	FBXO3
OBS_BC_202152	V2LHS_117407	14.74	69.07	83667	SESN2
OBS_BC_202157	V2LHS_202956	90.41	83.48	6095	RORA
OBS_BC_202157	V2LHS_202956	81.04	66.9	6095	RORA
OBS_BC_202158	V2LHS_22174	91.94	90.58	55966	AJAP1
OBS_BC_202158	V2LHS_22174	91.93	70.54	55966	AJAP1
OBS_BC_202160	V2LHS_132037	93.72	57.15	2895	GRID2
OBS_BC_202166	V2LHS_242018	83.9	52.01	8570	KHSRP
OBS_BC_202166	V2LHS_242018	72.88	41.8	8570	KHSRP
OBS_BC_202169	V2LHS_31577	67.61	84.72	6332	SCN7A
OBS_BC_202169	V2LHS_31577	55.52	56.31	6332	SCN7A
OBS_BC_202177	V2LHS_22725	31.71	15.56	-	-
OBS_BC_202178	V2LHS_172083	81.9	34.02	7534	YWHAZ
OBS_BC_202178	V2LHS_172083	80.2	30.34	7534	YWHAZ
OBS_BC_202179	V2LHS_143497	40.53	49.1	344018	FIGLA
OBS_BC_202179	V2LHS_143497	40.52	34.13	344018	FIGLA
OBS_BC_202180	V2LHS_62481	77.58	93.66	9632	SEC24C
OBS_BC_202180	V2LHS_62481	68.8	84.84	9632	SEC24C
OBS_BC_202182	V2LHS_101727	55.71	91.35	151242	PPP1R1C
OBS_BC_202182	V2LHS_101727	45.16	83.46	151242	PPP1R1C
OBS_BC_202183	V2LHS_32362	8.77	70.56	246243	RNASEH1
OBS_BC_202183	V2LHS_32362	8.76	62.39	246243	RNASEH1
OBS_BC_202186	V2LHS_65957	77.78	78.3	57823	SLAMF7
OBS_BC_202186	V2LHS_65957	77.32	69.56	57823	SLAMF7
OBS_BC_202188	V2LHS_131780	5.17	28.22	2316	FLNA
OBS_BC_202188	V2LHS_131780	4.74	20.29	2316	FLNA
OBS_BC_202192	V2LHS_16853	70.41	95.72	8789	FBP2
OBS_BC_202192	V2LHS_16853	58.93	93.5	8789	FBP2
OBS_BC_202194	V2LHS_118833	44.91	28.07	79659	DYNC2H1
OBS_BC_202196	V2LHS_98232	38.87	24.09	64710	NUCKS1
OBS_BC_202196	V2LHS_98232	36.13	20.44	64710	NUCKS1
OBS_BC_202198	V2LHS_50499	19.02	52.98	23764	MAFF
OBS_BC_202198	V2LHS_50499	18.18	44.93	23764	MAFF
OBS_BC_202200	V2LHS_178062	73.46	36.09	84973, 677824	SNHG7, SNORA43
OBS_BC_202201	V2LHS_52977	37.03	78.57	8857	FCGBP
OBS_BC_202201	V2LHS_52977	36.06	54.03	8857	FCGBP
OBS_BC_202205	V2LHS_17317	65.4	58.03	8741, 407977	TNFSF13, TNFSF12-TNFSF13
OBS_BC_202205	V2LHS_17317	64.3	38.73	8741, 407977	TNFSF13, TNFSF12-TNFSF13
OBS_BC_202207	V2LHS_118395	26.89	9.47	113540	CMTM1
OBS_BC_202207	V2LHS_118395	23.84	6.37	113540	CMTM1
OBS_BC_202210	V2LHS_81220	31.92	21.34	64377	CHST8
OBS_BC_202212	V2LHS_153077	32.38	0.23	6580	SLC22A1
OBS_BC_202212	V2LHS_153077	21.68	0.03	6580	SLC22A1
OBS_BC_202213	V2LHS_113379	56.16	29.79	1613	DAPK3
OBS_BC_202215	V2LHS_80153	60.5	64.92	9287	TAAR2
OBS_BC_202215	V2LHS_80153	56.23	35.97	9287	TAAR2
OBS_BC_202218	V2LHS_43900	21.48	15.45	1399	CRKL
OBS_BC_202218	V2LHS_43900	16.16	6.14	1399	CRKL
OBS_BC_202222	V2LHS_49201	67.23	78.65	70	ACTC1
OBS_BC_202222	V2LHS_49201	64.45	66.58	70	ACTC1
OBS_BC_202224	V2LHS_249588	64.54	48.98	2984	GUCY2C
OBS_BC_202224	V2LHS_249588	53.38	42.6	2984	GUCY2C
OBS_BC_202225	V2LHS_234305	98.03	98.35	3034	HAL
OBS_BC_202225	V2LHS_234305	97.17	98.19	3034	HAL
OBS_BC_202228	V2LHS_94511	68.99	88.89	308	ANXA5
OBS_BC_202230	V2LHS_166200	78.41	52.9	4698	NDUFA5
OBS_BC_202232	V2LHS_253830	66.45	48.06	3613	IMPA2
OBS_BC_202232	V2LHS_253830	59.56	40.62	3613	IMPA2
OBS_BC_202233	V2LHS_177163	5.27	3	80063	ATF7IP2
OBS_BC_202233	V2LHS_177163	4.99	2.3	80063	ATF7IP2
OBS_BC_202238	V2LHS_97544	4.88	12.31	51124	IER3IP1
OBS_BC_202243	V2LHS_15111	76.21	66.69	699	BUB1
OBS_BC_202243	V2LHS_15111	67.12	60.24	699	BUB1
OBS_BC_202244	V2LHS_202889	78.62	76.09	26261	FBXO24
OBS_BC_202249	V2LHS_5817	89.59	53.64	10537	UBD
OBS_BC_202249	V2LHS_5817	72.6	42.7	10537	UBD
OBS_BC_202250	V2LHS_93704	22.64	30.82	2209	FCGR1A
OBS_BC_202250	V2LHS_93704	22.1	15.34	2209	FCGR1A
OBS_BC_202254	V2LHS_15814	22.49	23.05	91373	UAP1L1
OBS_BC_202255	V2LHS_113496	78.44	76.42	1777	DNASE2
OBS_BC_202255	V2LHS_113496	66.55	31.54	1777	DNASE2
OBS_BC_202256	V2LHS_11857	95.78	88.3	10943	MSL3L1
OBS_BC_202256	V2LHS_11857	64.11	74.3	10943	MSL3L1
OBS_BC_202257	V2LHS_218476	69.58	77.9	7436	VLDLR
OBS_BC_202263	V2LHS_159047	68.68	44.76	84532	ACSS1
OBS_BC_202263	V2LHS_159047	52.42	24.88	84532	ACSS1
OBS_BC_202265	V2LHS_170884	88.47	81.4	5763	PTMS
OBS_BC_202265	V2LHS_170884	71.21	72.43	5763	PTMS
OBS_BC_202268	V2LHS_15102	21.76	25.44	1069	CETN2
OBS_BC_202280	V2LHS_150348	74.07	41.18	945	CD33
OBS_BC_202280	V2LHS_150348	55.11	23.67	945	CD33
OBS_BC_202286	V2LHS_122706	20.79	65.46	160418	TMTC3
OBS_BC_202288	V2LHS_256364	38.2	83.28	23195	MDN1
OBS_BC_202288	V2LHS_256364	29.98	29.05	23195	MDN1
OBS_BC_202296	V2LHS_202568	71.13	85.54	9673	SLC25A44
OBS_BC_202296	V2LHS_202568	66.7	65.12	9673	SLC25A44
OBS_BC_202298	V2LHS_23959	53.4	23.74	8647	ABCB11
OBS_BC_202302	V2LHS_22224	61.11	44.74	9782	MATR3
OBS_BC_202303	V2LHS_116767	79.2	87.29	26292, 81025	MYCBP, GJA9
OBS_BC_202303	V2LHS_116767	68.94	55.65	26292, 81025	MYCBP, GJA9
OBS_BC_202311	V2LHS_121582	93.27	93.25	1845	DUSP3
OBS_BC_202311	V2LHS_121582	93.03	92.89	1845	DUSP3
OBS_BC_202321	V2LHS_224200	39.71	52.87	2020	EN2
OBS_BC_202321	V2LHS_224200	31.73	38.98	2020	EN2
OBS_BC_202323	V2LHS_42837	98.29	86.29	2620	GAS2
OBS_BC_202323	V2LHS_42837	51.52	32.41	2620	GAS2
OBS_BC_202324	V2LHS_57636	85.67	89.2	5583	PRKCH
OBS_BC_202324	V2LHS_57636	85.66	71.92	5583	PRKCH
OBS_BC_202326	V2LHS_16716	31.16	40.37	8796	SCEL
OBS_BC_202326	V2LHS_16716	29.4	29.99	8796	SCEL
OBS_BC_202327	V2LHS_59954	82.67	61.17	25842	ASF1A
OBS_BC_202327	V2LHS_59954	69.01	56.53	25842	ASF1A
OBS_BC_202330	V2LHS_133930	96.03	87.74	3938	LCT
OBS_BC_202330	V2LHS_133930	95.87	82.46	3938	LCT
OBS_BC_202335	V2LHS_199776	80.36	59.66	23586	DDX58
OBS_BC_202339	V2LHS_173413	69.65	92.3	55617	TASP1
OBS_BC_202339	V2LHS_173413	66.23	90.44	55617	TASP1
OBS_BC_202341	V2LHS_172812	37.65	60.44	1015	CDH17
OBS_BC_202342	V2LHS_122852	71.26	56.35	6160, 387991, 390283, 641311, 645993, 653773, 729646, 100129882, 100130130	RPL31, RPL31P4, RPL31P10, LOC641311, hCG_1793136, LOC653773, LOC729646, LOC100129882, LOC100130130
OBS_BC_202342	V2LHS_122852	60.44	38.16	6160, 387991, 390283, 641311, 645993, 653773, 729646, 100129882, 100130130	RPL31, RPL31P4, RPL31P10, LOC641311, hCG_1793136, LOC653773, LOC729646, LOC100129882, LOC100130130
OBS_BC_202348	V2LHS_150836	92.57	94.65	1359	CPA3
OBS_BC_202348	V2LHS_150836	91.04	82.32	1359	CPA3
OBS_BC_202350	V2LHS_156552	48.25	29.24	55251	PCMTD2
OBS_BC_202350	V2LHS_156552	45.75	22.23	55251	PCMTD2
OBS_BC_202351	V2LHS_94153	94.94	93.47	13	AADAC
OBS_BC_202351	V2LHS_94153	88.09	92.28	13	AADAC
OBS_BC_202361	V2LHS_20145	41.66	80.21	5136	PDE1A
OBS_BC_202361	V2LHS_20145	38.44	67.74	5136	PDE1A
OBS_BC_202364	V2LHS_84296	55.96	71.82	11039, 153561, 349035, 387036, 653080, 653188, 728411, 730393, 100049076, 100132134, 100133831	SMA4, GUSBP1, MGC22265, GUSBL1, LOC653080, LOC653188, LOC728411, LOC730393, LOC100049076, LOC100132134, LOC100133831
OBS_BC_202364	V2LHS_84296	54.24	50.67	11039, 153561, 349035, 387036, 653080, 653188, 728411, 730393, 100049076, 100132134, 100133831	SMA4, GUSBP1, MGC22265, GUSBL1, LOC653080, LOC653188, LOC728411, LOC730393, LOC100049076, LOC100132134, LOC100133831
OBS_BC_202367	V2LHS_94302	97.14	92.54	103	ADAR
OBS_BC_202367	V2LHS_94302	94.69	71.92	103	ADAR
OBS_BC_202369	V2LHS_24861	35.56	65.36	23552	CCRK
OBS_BC_202369	V2LHS_24861	34.26	60.14	23552	CCRK
OBS_BC_202373	V2LHS_114778	18.27	24.13	10352	WARS2
OBS_BC_202373	V2LHS_114778	16.47	21.57	10352	WARS2
OBS_BC_202375	V2LHS_150031	55.88	57.7	640	BLK
OBS_BC_202375	V2LHS_150031	47.83	53.62	640	BLK
OBS_BC_202378	V2LHS_238840	70.8	55.61	7919	BAT1
OBS_BC_202380	V2LHS_177949	60.62	47.58	84952	CGNL1
OBS_BC_202382	V2LHS_33322	95.49	93.51	200634	KRTCAP3
OBS_BC_202382	V2LHS_33322	86.76	88.34	200634	KRTCAP3
OBS_BC_202387	V2LHS_195364	96.88	78.52	-	-
OBS_BC_202387	V2LHS_195364	94.65	67.36	-	-
OBS_BC_202392	V2LHS_131140	20.32	76.22	3695	ITGB7
OBS_BC_202392	V2LHS_131140	16.1	52.76	3695	ITGB7
OBS_BC_202406	V2LHS_240396	31.7	7.54	23568	ARL2BP
OBS_BC_202407	V2LHS_134362	80.42	60.5	7041	TGFB1I1
OBS_BC_202407	V2LHS_134362	58.94	47.9	7041	TGFB1I1
OBS_BC_202408	V2LHS_155786	45.92	88.79	55716	LMBR1L
OBS_BC_202408	V2LHS_155786	39.94	80.24	55716	LMBR1L
OBS_BC_202422	V2LHS_27284	94.32	83.12	8548	BLZF1
OBS_BC_202422	V2LHS_27284	93.57	81.2	8548	BLZF1
OBS_BC_202426	V2LHS_177752	62.71	67.17	84916	CIRH1A
OBS_BC_202426	V2LHS_177752	56.36	45.26	84916	CIRH1A
OBS_BC_202429	V2LHS_54204	68.26	64.14	133619	PRRC1
OBS_BC_202429	V2LHS_54204	67.22	39.46	133619	PRRC1
OBS_BC_202433	V2LHS_17327	37.26	11.64	2255	FGF10
OBS_BC_202433	V2LHS_17327	32.26	7.72	2255	FGF10
OBS_BC_202437	V2LHS_198724	82.33	97.33	8892	EIF2B2
OBS_BC_202438	V2LHS_212379	69.59	84.67	53942	CNTN5
OBS_BC_202438	V2LHS_212379	63.79	57.63	53942	CNTN5
OBS_BC_202439	V2LHS_217077	93.93	89.7	54112	GPR88
OBS_BC_202439	V2LHS_217077	90.4	70.01	54112	GPR88
OBS_BC_202448	V2LHS_230277	47.79	33	6175, 220717	RPLP0, RPLP0-like
OBS_BC_202448	V2LHS_230277	35.92	24.01	6175, 220717	RPLP0, RPLP0-like
OBS_BC_202450	V2LHS_64681	86.08	77.4	3927	LASP1
OBS_BC_202454	V2LHS_154399	92.25	94.16	54108	CHRAC1
OBS_BC_202454	V2LHS_154399	89.68	81.87	54108	CHRAC1
OBS_BC_202455	V2LHS_113779	94.9	95.5	2100	ESR2
OBS_BC_202455	V2LHS_113779	90.92	47.08	2100	ESR2
OBS_BC_202458	V2LHS_57859	47.91	98.21	196883	ADCY4
OBS_BC_202458	V2LHS_57859	46.98	97.06	196883	ADCY4
OBS_BC_202460	V2LHS_228762	88.37	90.06	80777	CYB5B
OBS_BC_202462	V2LHS_111868	62.49	70.32	6402	SELL
OBS_BC_202462	V2LHS_111868	42.93	65.84	6402	SELL
OBS_BC_202465	V2LHS_112222	41.18	39.8	777	CACNA1E
OBS_BC_202465	V2LHS_112222	40.21	33.8	777	CACNA1E
OBS_BC_202468	V2LHS_233010	87.2	63.61	631	BFSP1
OBS_BC_202468	V2LHS_233010	76.14	57.31	631	BFSP1
OBS_BC_202477	V2LHS_271860	45.67	57.41	5162	PDHB
OBS_BC_202477	V2LHS_271860	37.78	50.43	5162	PDHB
OBS_BC_202478	V2LHS_58877	75.12	73.58	57045	TWSG1
OBS_BC_202478	V2LHS_58877	72.27	64.44	57045	TWSG1
OBS_BC_202489	V2LHS_238853	97.41	92.19	54904	WHSC1L1
OBS_BC_202491	V2LHS_65911	88.5	58.18	57829	ZP4
OBS_BC_202493	V2LHS_118305	17.43	20.1	116337	PANX3
OBS_BC_202493	V2LHS_118305	16.54	16.57	116337	PANX3
OBS_BC_202494	V2LHS_1616	99.73	96.92	57538	ALPK3
OBS_BC_202494	V2LHS_1616	90.89	96.5	57538	ALPK3
OBS_BC_202499	V2LHS_197456	92.66	78.26	4175	MCM6
OBS_BC_202501	V2LHS_175547	44.88	36.49	55361	PI4K2A
OBS_BC_202501	V2LHS_175547	39.15	25.93	55361	PI4K2A
OBS_BC_202502	V2LHS_115086	44.29	59.18	51171	HSD17B14
OBS_BC_202505	V2LHS_113970	87.53	28.61	2444	FRK
OBS_BC_202511	V2LHS_71568	97.46	92.31	57222	ERGIC1
OBS_BC_202511	V2LHS_71568	89.18	84.57	57222	ERGIC1
OBS_BC_202512	V2LHS_134249	33.51	98.86	9669	EIF5B
OBS_BC_202512	V2LHS_134249	26.96	97.28	9669	EIF5B
OBS_BC_202514	V2LHS_24137	95.66	96.45	8638	OASL
OBS_BC_202514	V2LHS_24137	95.09	95.1	8638	OASL
OBS_BC_202517	V2LHS_131507	17.94	32.82	5737	PTGFR
OBS_BC_202517	V2LHS_131507	14.82	20.22	5737	PTGFR
OBS_BC_202519	V2LHS_92253	48.14	62.31	5373, 100130283	PMM2, LOC100130283
OBS_BC_202521	V2LHS_195395	95.54	80.79	389376	SFTPG
OBS_BC_202521	V2LHS_195395	92.54	74.07	389376	SFTPG
OBS_BC_202524	V2LHS_264021	80.11	65.29	55384	MEG3
OBS_BC_202524	V2LHS_264021	70.54	46.37	55384	MEG3
OBS_BC_202528	V2LHS_113449	48.11	35.77	1736	DKC1
OBS_BC_202529	V2LHS_90260	22.02	23.13	10881	ACTL7A
OBS_BC_202529	V2LHS_90260	20.75	19.7	10881	ACTL7A
OBS_BC_202536	V2LHS_211968	82.32	90.23	10599	SLCO1B1
OBS_BC_202538	V2LHS_200816	13.32	69.06	23753	SDF2L1
OBS_BC_202538	V2LHS_200816	13.06	50	23753	SDF2L1
OBS_BC_202543	V2LHS_209049	64	27.1	25758	C11orf41
OBS_BC_202544	V2LHS_199406	66.48	64.49	10529	NEBL
OBS_BC_202544	V2LHS_199406	65.16	61.95	10529	NEBL
OBS_BC_202546	V2LHS_150039	69.91	33.23	646	BNC1
OBS_BC_202546	V2LHS_150039	52.9	18.43	646	BNC1
OBS_BC_202554	V2LHS_78857	63.07	81.73	9706	ULK2
OBS_BC_202555	V2LHS_113187	67.49	56.13	1369	CPN1
OBS_BC_202555	V2LHS_113187	27.48	51.3	1369	CPN1
OBS_BC_202562	V2LHS_68987	27.69	18.81	9378	NRXN1
OBS_BC_202562	V2LHS_68987	23.77	17.75	9378	NRXN1
OBS_BC_202564	V2LHS_203656	62.93	35.66	10255	HCG9
OBS_BC_202564	V2LHS_203656	58.09	24.13	10255	HCG9
OBS_BC_202566	V2LHS_96071	73.03	92.98	22859	LPHN1
OBS_BC_202566	V2LHS_96071	61.75	83.57	22859	LPHN1
OBS_BC_202568	V2LHS_92190	66	52.95	-	-
OBS_BC_202568	V2LHS_92190	57.97	42.81	-	-
OBS_BC_202579	V2LHS_64253	63.93	81.85	4780	NFE2L2
OBS_BC_202579	V2LHS_64253	38.16	80.47	4780	NFE2L2
OBS_BC_202587	V2LHS_113212	99.13	89.95	1400	CRMP1
OBS_BC_202587	V2LHS_113212	98.91	84.08	1400	CRMP1
OBS_BC_202589	V2LHS_175549	59.44	41.21	54700, 653390, 730092	RRN3, LOC653390, LOC730092
OBS_BC_202589	V2LHS_175549	45.1	37.65	54700, 653390, 730092	RRN3, LOC653390, LOC730092
OBS_BC_202591	V2LHS_70565	63.08	48.22	23767	FLRT3
OBS_BC_202591	V2LHS_70565	53.3	25.05	23767	FLRT3
OBS_BC_202594	V2LHS_111842	90.3	82.51	356	FASLG
OBS_BC_202594	V2LHS_111842	85.82	37.42	356	FASLG
OBS_BC_202602	V2LHS_198270	95.84	90.67	27301	APEX2
OBS_BC_202602	V2LHS_198270	76.7	86.21	27301	APEX2
OBS_BC_202608	V2LHS_140530	92.26	91.92	201294	UNC13D
OBS_BC_202608	V2LHS_140530	89.87	75.63	201294	UNC13D
OBS_BC_202613	V2LHS_158738	94.39	87.03	7478	WNT8A
OBS_BC_202613	V2LHS_158738	91.85	65.15	7478	WNT8A
OBS_BC_202614	V2LHS_45843	34.55	41.43	54716	SLC6A20
OBS_BC_202615	V2LHS_262231	86.17	79.76	10097, 284441	ACTR2, LOC284441
OBS_BC_202620	V2LHS_37725	84.49	97.85	3050	HBZ
OBS_BC_202620	V2LHS_37725	54.69	94.06	3050	HBZ
OBS_BC_202623	V2LHS_97571	84.87	47.49	51388	NIP7
OBS_BC_202623	V2LHS_97571	56.49	35.08	51388	NIP7
OBS_BC_202628	V2LHS_23216	76.41	65.43	8724	SNX3
OBS_BC_202628	V2LHS_23216	64.86	54	8724	SNX3
OBS_BC_202632	V2LHS_58056	4.84	7.81	5467	PPARD
OBS_BC_202632	V2LHS_58056	4.77	6.62	5467	PPARD
OBS_BC_202636	V2LHS_75578	21.6	19.38	5191	PEX7
OBS_BC_202636	V2LHS_75578	19	12.58	5191	PEX7
OBS_BC_202638	V2LHS_223982	78.79	77.14	93589	CACNA2D4
OBS_BC_202638	V2LHS_223982	68.06	64.02	93589	CACNA2D4
OBS_BC_202643	V2LHS_170951	81.4	59.75	5782	PTPN12
OBS_BC_202643	V2LHS_170951	79.34	47.27	5782	PTPN12
OBS_BC_202647	V2LHS_137570	44.71	13.89	80380	PDCD1LG2
OBS_BC_202647	V2LHS_137570	41.51	12.56	80380	PDCD1LG2
OBS_BC_202648	V2LHS_99196	15.12	8.61	9374, 80864	PPT2, EGFL8
OBS_BC_202648	V2LHS_99196	14.21	3.96	9374, 80864	PPT2, EGFL8
OBS_BC_202666	V2LHS_75020	80.27	82.71	23370	ARHGEF18
OBS_BC_202666	V2LHS_75020	70.72	58.14	23370	ARHGEF18
OBS_BC_202670	V2LHS_279511	34.12	23.33	633	BGN
OBS_BC_202670	V2LHS_279511	31.31	22.58	633	BGN
OBS_BC_202677	V2LHS_53158	18.91	29.91	8835	SOCS2
OBS_BC_202677	V2LHS_53158	16.14	14.12	8835	SOCS2
OBS_BC_202679	V2LHS_112290	30.13	66.23	915	CD3D
OBS_BC_202679	V2LHS_112290	27.48	55.99	915	CD3D
OBS_BC_202683	V2LHS_245964	84.96	71.61	128859	BPIL3
OBS_BC_202683	V2LHS_245964	75.18	54.56	128859	BPIL3
OBS_BC_202686	V2LHS_32526	75.88	94.23	8451	CUL4A
OBS_BC_202686	V2LHS_32526	71.32	58.05	8451	CUL4A
OBS_BC_202687	V2LHS_207578	57.4	46.26	10276	NET1
OBS_BC_202687	V2LHS_207578	40.83	19.28	10276	NET1
OBS_BC_202690	V2LHS_220754	7.94	26.81	200162	SPAG17
OBS_BC_202690	V2LHS_220754	7.79	13.3	200162	SPAG17
OBS_BC_202697	V2LHS_78076	17.74	13.11	339345	NANOS2
OBS_BC_202697	V2LHS_78076	15.88	9.12	339345	NANOS2
OBS_BC_202713	V2LHS_86597	43.93	44.78	23237	ARC
OBS_BC_202713	V2LHS_86597	37.95	29.76	23237	ARC
OBS_BC_202718	V2LHS_255185	54.33	28.38	26027	ACOT11
OBS_BC_202726	V2LHS_64791	99.52	86.81	1783	DYNC1LI2
OBS_BC_202726	V2LHS_64791	81.22	78.41	1783	DYNC1LI2
OBS_BC_202734	V2LHS_117302	10.23	47.55	83594	NUDT12
OBS_BC_202734	V2LHS_117302	9.98	31.13	83594	NUDT12
OBS_BC_202735	V2LHS_132333	8.19	73.53	3604	TNFRSF9
OBS_BC_202735	V2LHS_132333	6.93	42	3604	TNFRSF9
OBS_BC_202737	V2LHS_15388	95.86	85.09	417	ART1
OBS_BC_202738	V2LHS_237073	63.99	83.18	80279	CDK5RAP3
OBS_BC_202738	V2LHS_237073	63.19	71.25	80279	CDK5RAP3
OBS_BC_202744	V2LHS_222732	9.66	88.38	54676	GTPBP2
OBS_BC_202747	V2LHS_245649	71.07	26.26	1945	EFNA4
OBS_BC_202747	V2LHS_245649	53.83	22.46	1945	EFNA4
OBS_BC_202758	V2LHS_138215	87.28	54.04	84224	NBPF3
OBS_BC_202758	V2LHS_138215	69.17	53.14	84224	NBPF3
OBS_BC_202766	V2LHS_176717	56.37	46.09	26291	FGF21
OBS_BC_202767	V2LHS_175708	23.17	87.52	54458	PRR13
OBS_BC_202767	V2LHS_175708	20.78	58.04	54458	PRR13
OBS_BC_202770	V2LHS_197861	36.41	73.24	9085, 9426, 203611, 253175	CDY1, CDY2A, CDY2B, CDY1B
OBS_BC_202774	V2LHS_17890	30.1	49.19	2029	ENSA
OBS_BC_202774	V2LHS_17890	25.21	24.19	2029	ENSA
OBS_BC_202784	V2LHS_5824	23.07	36.88	10135	NAMPT
OBS_BC_202784	V2LHS_5824	22.12	32.16	10135	NAMPT
OBS_BC_202792	V2LHS_150892	55.65	93.94	5648	MASP1
OBS_BC_202792	V2LHS_150892	42.22	78.71	5648	MASP1
OBS_BC_202793	V2LHS_227201	99.97	81.38	116337	PANX3
OBS_BC_202794	V2LHS_117968	78.01	53.97	84101	USP44
OBS_BC_202794	V2LHS_117968	56.13	37.72	84101	USP44
OBS_BC_202798	V2LHS_248169	69.56	58.24	28988	DBNL
OBS_BC_202798	V2LHS_248169	65.83	44.62	28988	DBNL
OBS_BC_202801	V2LHS_111787	1.43	2.59	3588	IL10RB
OBS_BC_202801	V2LHS_111787	1.37	1.7	3588	IL10RB
OBS_BC_202805	V2LHS_203567	94.54	85.36	26263	FBXO22
OBS_BC_202805	V2LHS_203567	94.53	75.75	26263	FBXO22
OBS_BC_202808	V2LHS_117757	92.01	93.99	10929	SFRS2B
OBS_BC_202808	V2LHS_117757	91.2	91.9	10929	SFRS2B
OBS_BC_202809	V2LHS_134507	12.51	97.39	51072, 645175	MEMO1, LOC645175
OBS_BC_202811	V2LHS_158871	84.24	75.53	83903	GSG2
OBS_BC_202811	V2LHS_158871	81.1	70.84	83903	GSG2
OBS_BC_202818	V2LHS_207017	91.13	93.03	-	-
OBS_BC_202818	V2LHS_207017	81.84	83.69	-	-
OBS_BC_202823	V2LHS_91704	98.95	72.08	27306	PGDS
OBS_BC_202828	V2LHS_58888	89.58	82.19	131890	GRK7
OBS_BC_202828	V2LHS_58888	82.93	79.8	131890	GRK7
OBS_BC_202831	V2LHS_77698	53.03	93.58	388403	YPEL2
OBS_BC_202832	V2LHS_93173	99.25	82.56	7068	THRB
OBS_BC_202832	V2LHS_93173	95.71	74.2	7068	THRB
OBS_BC_202835	V2LHS_270169	85.71	87.35	6184, 285226	RPN1, FLJ40473
OBS_BC_202835	V2LHS_270169	80.77	61.39	6184, 285226	RPN1, FLJ40473
OBS_BC_202837	V2LHS_174138	37.87	51.76	54956	PARP16
OBS_BC_202837	V2LHS_174138	35.35	51.15	54956	PARP16
OBS_BC_202839	V2LHS_62040	66.31	58.34	1824	DSC2
OBS_BC_202839	V2LHS_62040	47.19	49.41	1824	DSC2
OBS_BC_202842	V2LHS_158797	96.62	63.47	116988	CENTG3
OBS_BC_202842	V2LHS_158797	77.97	55.78	116988	CENTG3
OBS_BC_202845	V2LHS_205637	88.92	86.37	-	-
OBS_BC_202845	V2LHS_205637	85.97	61.75	-	-
OBS_BC_202848	V2LHS_21013	53.44	15.58	123228	SENP8
OBS_BC_202848	V2LHS_21013	42.35	13.62	123228	SENP8
OBS_BC_202852	V2LHS_230423	73.95	83.4	25909	AHCTF1
OBS_BC_202852	V2LHS_230423	73.64	75.23	25909	AHCTF1
OBS_BC_202854	V2LHS_202514	77.19	66.99	146057	TTBK2
OBS_BC_202854	V2LHS_202514	77.18	35.65	146057	TTBK2
OBS_BC_202856	V2LHS_89505	46.14	86.35	411	ARSB
OBS_BC_202856	V2LHS_89505	44.35	83.59	411	ARSB
OBS_BC_202858	V2LHS_94089	86.51	35.59	7155	TOP2B
OBS_BC_202858	V2LHS_94089	76.08	33.69	7155	TOP2B
OBS_BC_202863	V2LHS_86059	69.25	62.11	22796	COG2
OBS_BC_202863	V2LHS_86059	67.54	45.49	22796	COG2
OBS_BC_202865	V2LHS_90674	95.16	66.12	10846	PDE10A
OBS_BC_202865	V2LHS_90674	88.49	53.28	10846	PDE10A
OBS_BC_202866	V2LHS_169884	58.46	59.5	5204	PFDN5
OBS_BC_202866	V2LHS_169884	51.42	56.99	5204	PFDN5
OBS_BC_202870	V2LHS_28740	63.43	86.92	197370	NSMCE1
OBS_BC_202872	V2LHS_83508	80.95	60.6	2395	FXN
OBS_BC_202872	V2LHS_83508	66.29	54.1	2395	FXN
OBS_BC_202874	V2LHS_118024	14.29	10.68	92126	DSEL
OBS_BC_202874	V2LHS_118024	13.16	9.43	92126	DSEL
OBS_BC_202880	V2LHS_89704	99.28	97.95	229	ALDOB
OBS_BC_202880	V2LHS_89704	90.07	96.24	229	ALDOB
OBS_BC_202882	V2LHS_281732	71.84	80.23	4151	MB
OBS_BC_202882	V2LHS_281732	70.05	49.44	4151	MB
OBS_BC_202889	V2LHS_68685	18.95	22.22	10008	KCNE3
OBS_BC_202889	V2LHS_68685	14.98	17.48	10008	KCNE3
OBS_BC_202892	V2LHS_201789	99.61	79.93	23014	FBXO21
OBS_BC_202892	V2LHS_201789	95.6	76.56	23014	FBXO21
OBS_BC_202897	V2LHS_246643	20.56	60.94	3033	HADH
OBS_BC_202897	V2LHS_246643	12.45	25.61	3033	HADH
OBS_BC_202900	V2LHS_175282	20.59	8.37	55333	SYNJ2BP
OBS_BC_202900	V2LHS_175282	20.58	7	55333	SYNJ2BP
OBS_BC_202905	V2LHS_68116	85.12	58.88	10054	UBA2
OBS_BC_202905	V2LHS_68116	76.83	58.46	10054	UBA2
OBS_BC_202908	V2LHS_247495	10.56	97.02	26063	DECR2
OBS_BC_202908	V2LHS_247495	10.15	90.82	26063	DECR2
OBS_BC_202910	V2LHS_151315	9.75	18.38	1907	EDN2
OBS_BC_202910	V2LHS_151315	9.66	11.03	1907	EDN2
OBS_BC_202915	V2LHS_242367	79.28	28.36	8322	FZD4
OBS_BC_202916	V2LHS_81036	50.81	73.85	23303	KIF13B
OBS_BC_202916	V2LHS_81036	43.93	41	23303	KIF13B
OBS_BC_202917	V2LHS_84191	73.53	65.24	1588	CYP19A1
OBS_BC_202917	V2LHS_84191	68.78	46.07	1588	CYP19A1
OBS_BC_202925	V2LHS_200106	85.36	76.77	10574	CCT7
OBS_BC_202925	V2LHS_200106	79.31	61.15	10574	CCT7
OBS_BC_202927	V2LHS_118204	78.92	56.72	115362	GBP5
OBS_BC_202927	V2LHS_118204	76.76	43.7	115362	GBP5
OBS_BC_202930	V2LHS_246159	47.5	60.81	3611, 55522	ILK, ILK-2
OBS_BC_202930	V2LHS_246159	38.78	45.74	3611, 55522	ILK, ILK-2
OBS_BC_202935	V2LHS_150077	4.92	10.56	667	DST
OBS_BC_202935	V2LHS_150077	4.72	9.66	667	DST
OBS_BC_202938	V2LHS_133924	98.18	90.13	3936	LCP1
OBS_BC_202938	V2LHS_133924	94.12	89.07	3936	LCP1
OBS_BC_202940	V2LHS_227515	9.54	6.4	1973	EIF4A1
OBS_BC_202941	V2LHS_224353	77.42	76.39	1270, 386607	CNTF, ZFP91-CNTF
OBS_BC_202941	V2LHS_224353	75.42	57.36	1270, 386607	CNTF, ZFP91-CNTF
OBS_BC_202942	V2LHS_151864	65.42	32.48	4331	MNAT1
OBS_BC_202942	V2LHS_151864	54.19	18.14	4331	MNAT1
OBS_BC_202948	V2LHS_202406	54.75	74.77	1902	LPAR1
OBS_BC_202948	V2LHS_202406	50.27	65.88	1902	LPAR1
OBS_BC_202949	V2LHS_85101	38.53	20.53	8632	DNAH17
OBS_BC_202949	V2LHS_85101	22.82	17.19	8632	DNAH17
OBS_BC_202952	V2LHS_113942	44.94	37.77	2339	FNTA
OBS_BC_202954	V2LHS_80458	13.08	36.75	23327	NEDD4L
OBS_BC_202954	V2LHS_80458	13.07	24.8	23327	NEDD4L
OBS_BC_202959	V2LHS_17006	59.67	93.45	2653, 641746, 644370, 654085, 730107	GCSH, LOC641746, LOC644370, LOC654085, LOC730107
OBS_BC_202959	V2LHS_17006	59.18	52.46	2653, 641746, 644370, 654085, 730107	GCSH, LOC641746, LOC644370, LOC654085, LOC730107
OBS_BC_202962	V2LHS_133006	15.72	2.9	3035	HARS
OBS_BC_202962	V2LHS_133006	14.02	2.09	3035	HARS
OBS_BC_202965	V2LHS_264027	54.1	51.14	352954	tcag7.1177
OBS_BC_202965	V2LHS_264027	47.04	37.55	352954	tcag7.1177
OBS_BC_202974	V2LHS_208534	95.73	94.53	23154	NCDN
OBS_BC_202974	V2LHS_208534	94.11	89.81	23154	NCDN
OBS_BC_202977	V2LHS_24237	85.73	78.11	8625	RFXANK
OBS_BC_202982	V2LHS_23220	84.54	84.93	8724	SNX3
OBS_BC_202982	V2LHS_23220	71.67	80.17	8724	SNX3
OBS_BC_202987	V2LHS_254277	93.9	98.43	23077	MYCBP2
OBS_BC_202987	V2LHS_254277	83.88	97.64	23077	MYCBP2
OBS_BC_202989	V2LHS_63564	82.45	38.31	84451	KIAA1804
OBS_BC_202991	V2LHS_199843	70.83	77.96	23464	GCAT
OBS_BC_202991	V2LHS_199843	59.91	70.12	23464	GCAT
OBS_BC_202992	V2LHS_70170	92.7	74.07	92737	DNER
OBS_BC_202992	V2LHS_70170	84.9	73.99	92737	DNER
OBS_BC_202997	V2LHS_52947	68.51	63.08	8867	SYNJ1
OBS_BC_202997	V2LHS_52947	66.32	48.8	8867	SYNJ1
OBS_BC_202998	V2LHS_115836	89	62.15	51752	ERAP1
OBS_BC_202999	V2LHS_83871	30.53	12.66	2052	EPHX1
OBS_BC_203003	V2LHS_251349	88.71	75.52	4191	MDH2
OBS_BC_203003	V2LHS_251349	82.28	75.45	4191	MDH2
OBS_BC_203006	V2LHS_176131	95.42	86.69	54407	SLC38A2
OBS_BC_203006	V2LHS_176131	94	63.72	54407	SLC38A2
OBS_BC_203009	V2LHS_66249	14.18	26.41	57786	RBAK
OBS_BC_203009	V2LHS_66249	11.63	21.68	57786	RBAK
OBS_BC_203012	V2LHS_255947	13.81	96.74	11336	EXOC3
OBS_BC_203012	V2LHS_255947	12.47	95.95	11336	EXOC3
OBS_BC_203015	V2LHS_267053	99.47	93.98	51166	AADAT
OBS_BC_203015	V2LHS_267053	99.44	93.23	51166	AADAT
OBS_BC_203023	V2LHS_178025	69.36	86.51	84967	LSM10
OBS_BC_203023	V2LHS_178025	60.38	72.64	84967	LSM10
OBS_BC_203026	V2LHS_218392	25.52	34.54	4946	OAZ1
OBS_BC_203029	V2LHS_33410	52.75	53.65	8369	HIST1H4G
OBS_BC_203029	V2LHS_33410	48.2	43.39	8369	HIST1H4G
OBS_BC_203034	V2LHS_83746	33.16	48.47	2160	F11
OBS_BC_203034	V2LHS_83746	32.61	27.93	2160	F11
OBS_BC_203036	V2LHS_233383	97.84	94.18	358	AQP1
OBS_BC_203036	V2LHS_233383	85.74	54.86	358	AQP1
OBS_BC_203044	V2LHS_224911	65.34	31.66	83696	NIBP
OBS_BC_203044	V2LHS_224911	63.19	23.41	83696	NIBP
OBS_BC_203045	V2LHS_133708	98.18	85.77	3790	KCNS3
OBS_BC_203045	V2LHS_133708	86.89	76.58	3790	KCNS3
OBS_BC_203052	V2LHS_12455	52.45	34.85	4303	FOXO4
OBS_BC_203055	V2LHS_56336	85.5	60.49	6883	TAF12
OBS_BC_203055	V2LHS_56336	61.03	47.32	6883	TAF12
OBS_BC_203056	V2LHS_176676	98.63	91.34	55964	2010-09-03
OBS_BC_203056	V2LHS_176676	97.13	89.32	55964	2010-09-03
OBS_BC_203068	V2LHS_62457	35.69	42.69	4064	CD180
OBS_BC_203068	V2LHS_62457	35.27	34.55	4064	CD180
OBS_BC_203069	V2LHS_159843	61.15	64.59	85414	SLC45A3
OBS_BC_203069	V2LHS_159843	55.1	48.94	85414	SLC45A3
OBS_BC_203073	V2LHS_172891	62.2	86.56	1639	DCTN1
OBS_BC_203073	V2LHS_172891	48.02	74.97	1639	DCTN1
OBS_BC_203079	V2LHS_118620	66.78	54.51	130340	AP1S3
OBS_BC_203079	V2LHS_118620	54.49	40.53	130340	AP1S3
OBS_BC_203083	V2LHS_223941	98.48	93.86	27438	CECR7
OBS_BC_203083	V2LHS_223941	97.92	85.92	27438	CECR7
OBS_BC_203084	V2LHS_225602	31.72	52.24	23710	GABARAPL1
OBS_BC_203084	V2LHS_225602	27.72	47.2	23710	GABARAPL1
OBS_BC_203088	V2LHS_136881	85.62	66.83	80150	ASRGL1
OBS_BC_203090	V2LHS_234135	47.99	50.08	81789	TIGD6
OBS_BC_203090	V2LHS_234135	45.69	31.16	81789	TIGD6
OBS_BC_203092	V2LHS_92196	57.27	98.01	228	ALDOAP2
OBS_BC_203092	V2LHS_92196	55.18	83.55	228	ALDOAP2
OBS_BC_203094	V2LHS_223880	81.01	42.66	1842	ECM2
OBS_BC_203094	V2LHS_223880	72.38	18.41	1842	ECM2
OBS_BC_203100	V2LHS_82924	45.41	44.57	64446	DNAI2
OBS_BC_203100	V2LHS_82924	37.98	32.29	64446	DNAI2
OBS_BC_203106	V2LHS_33664	83.81	61.33	8352	HIST1H3C
OBS_BC_203110	V2LHS_64904	21.62	51.53	830	CAPZA2
OBS_BC_203110	V2LHS_64904	14.92	12.88	830	CAPZA2
OBS_BC_203112	V2LHS_209258	93.98	64.8	10408, 100133778, 100134408	MYCNOS, LOC100133778, LOC100134408
OBS_BC_203112	V2LHS_209258	72.1	58.52	10408, 100133778, 100134408	MYCNOS, LOC100133778, LOC100134408
OBS_BC_203121	V2LHS_111730	55.41	75.91	3479	IGF1
OBS_BC_203121	V2LHS_111730	53	59.82	3479	IGF1
OBS_BC_203123	V2LHS_151603	76.2	84.12	4149	MAX
OBS_BC_203124	V2LHS_170403	24.46	99.22	5567	PRKACB
OBS_BC_203128	V2LHS_113657	76.26	67.19	1967	EIF2B1
OBS_BC_203128	V2LHS_113657	57.49	57.24	1967	EIF2B1
OBS_BC_203129	V2LHS_199505	96	57.33	25820	ARIH1
OBS_BC_203131	V2LHS_131042	19.07	11.15	3360	HTR4
OBS_BC_203132	V2LHS_113335	98.19	81.67	1525	CXADR
OBS_BC_203132	V2LHS_113335	76.81	74.99	1525	CXADR
OBS_BC_203135	V2LHS_78150	55.98	39.05	-	-
OBS_BC_203136	V2LHS_198196	6.86	66.44	10625	IVNS1ABP
OBS_BC_203138	V2LHS_133020	83.05	92.4	3067	HDC
OBS_BC_203138	V2LHS_133020	72.21	56.82	3067	HDC
OBS_BC_203139	V2LHS_172401	42.05	39.53	7857	SCG2
OBS_BC_203142	V2LHS_85515	90.78	93.93	5985	RFC5
OBS_BC_203142	V2LHS_85515	77.07	76.51	5985	RFC5
OBS_BC_203147	V2LHS_74473	66.01	69.65	59274	MESDC1
OBS_BC_203147	V2LHS_74473	60.77	62.03	59274	MESDC1
OBS_BC_203148	V2LHS_74072	12.23	95.63	2178	FANCE
OBS_BC_203148	V2LHS_74072	11.87	95.59	2178	FANCE
OBS_BC_203153	V2LHS_139155	82.4	83.19	2177	FANCD2
OBS_BC_203156	V2LHS_132350	8.58	6.54	3622	ING2
OBS_BC_203156	V2LHS_132350	8.17	2.63	3622	ING2
OBS_BC_203162	V2LHS_93999	38.68	99.31	6754	SSTR4
OBS_BC_203162	V2LHS_93999	35.46	99.11	6754	SSTR4
OBS_BC_203168	V2LHS_151911	42.07	23.75	4437	MSH3
OBS_BC_203168	V2LHS_151911	29.89	18.45	4437	MSH3
OBS_BC_203170	V2LHS_198989	49.47	49.28	24146	CLDN15
OBS_BC_203176	V2LHS_113761	72.53	83.85	2069	EREG
OBS_BC_203176	V2LHS_113761	69.95	48.19	2069	EREG
OBS_BC_203177	V2LHS_28326	66.38	95.58	9306	SOCS6
OBS_BC_203177	V2LHS_28326	59.05	69.45	9306	SOCS6
OBS_BC_203182	V2LHS_111837	93.51	73.16	7448	VTN
OBS_BC_203182	V2LHS_111837	86.51	63.38	7448	VTN
OBS_BC_203187	V2LHS_31214	22.06	34.72	6361	CCL17
OBS_BC_203187	V2LHS_31214	17.67	18.68	6361	CCL17
OBS_BC_203188	V2LHS_223927	6.83	6.23	26140	TTLL3
OBS_BC_203188	V2LHS_223927	6.75	5.66	26140	TTLL3
OBS_BC_203190	V2LHS_256682	60.8	69.7	64318	NOC3L
OBS_BC_203190	V2LHS_256682	54.1	66.87	64318	NOC3L
OBS_BC_203196	V2LHS_23829	26.56	69.33	8669	EIF3J
OBS_BC_203196	V2LHS_23829	23	65.77	8669	EIF3J
OBS_BC_203197	V2LHS_5989	59.54	25.89	22824	HSPA4L
OBS_BC_203197	V2LHS_5989	51.76	23.26	22824	HSPA4L
OBS_BC_203200	V2LHS_171472	69.65	68.89	7164	TPD52L1
OBS_BC_203200	V2LHS_171472	65.41	52.56	7164	TPD52L1
OBS_BC_203204	V2LHS_151392	95.62	87.45	1990	ELA1
OBS_BC_203204	V2LHS_151392	93.13	77.69	1990	ELA1
OBS_BC_203210	V2LHS_262286	95.51	85.49	5424	POLD1
OBS_BC_203210	V2LHS_262286	84.14	55.37	5424	POLD1
OBS_BC_203215	V2LHS_137104	89.31	90.71	80204	FBXO11
OBS_BC_203217	V2LHS_120366	75.75	67.02	285440	CYP4V2
OBS_BC_203220	V2LHS_151488	96.02	82.87	2140	EYA3
OBS_BC_203220	V2LHS_151488	88.61	69.01	2140	EYA3
OBS_BC_203221	V2LHS_215861	83.43	41.17	650805, 731568	RBM, LOC731568
OBS_BC_203221	V2LHS_215861	64.26	27.71	650805, 731568	RBM, LOC731568
OBS_BC_203224	V2LHS_57543	27.39	24.68	122809	SOCS4
OBS_BC_203227	V2LHS_63646	59.01	86.57	3338	DNAJC4
OBS_BC_203228	V2LHS_112379	81.94	68.82	1142	CHRNB3
OBS_BC_203228	V2LHS_112379	75.03	59.81	1142	CHRNB3
OBS_BC_203229	V2LHS_226020	6.32	21.9	3576	IL8
OBS_BC_203229	V2LHS_226020	6.14	8.89	3576	IL8
OBS_BC_203230	V2LHS_153463	98.97	83.37	6717	SRI
OBS_BC_203230	V2LHS_153463	98.64	80.7	6717	SRI
OBS_BC_203239	V2LHS_247130	70.33	61.08	142940	TRUB1
OBS_BC_203239	V2LHS_247130	68.59	44.27	142940	TRUB1
OBS_BC_203244	V2LHS_74073	34.05	50.47	2178	FANCE
OBS_BC_203244	V2LHS_74073	33.35	32.05	2178	FANCE
OBS_BC_203245	V2LHS_84032	64.74	99.63	10936	GPR75
OBS_BC_203245	V2LHS_84032	51.73	99.04	10936	GPR75
OBS_BC_203246	V2LHS_115045	52.23	66.78	51433	ANAPC5
OBS_BC_203246	V2LHS_115045	42.58	64.26	51433	ANAPC5
OBS_BC_203248	V2LHS_92731	89.56	48.21	642	BLMH
OBS_BC_203248	V2LHS_92731	65.74	40.1	642	BLMH
OBS_BC_203249	V2LHS_15358	37.27	41.15	444	ASPH
OBS_BC_203249	V2LHS_15358	29.28	24.97	444	ASPH
OBS_BC_203251	V2LHS_286487	87.35	69.44	140290	TCP10L
OBS_BC_203256	V2LHS_263194	96.29	86.43	57580	PREX1
OBS_BC_203256	V2LHS_263194	81.78	78.31	57580	PREX1
OBS_BC_203259	V2LHS_111919	84.25	62.78	125	ADH1B
OBS_BC_203260	V2LHS_152393	42.57	24.89	4916	NTRK3
OBS_BC_203263	V2LHS_80901	95.07	45.31	339883	C3orf35
OBS_BC_203267	V2LHS_171101	41.3	30.66	5833, 653414	PCYT2, LOC653414
OBS_BC_203267	V2LHS_171101	31.26	29.33	5833, 653414	PCYT2, LOC653414
OBS_BC_203270	V2LHS_118643	99.58	88.94	56246	MRAP
OBS_BC_203270	V2LHS_118643	99.01	77.57	56246	MRAP
OBS_BC_203277	V2LHS_197162	43.08	18.63	23585	TMEM50A
OBS_BC_203277	V2LHS_197162	37.06	15.43	23585	TMEM50A
OBS_BC_203280	V2LHS_259642	28.8	75.4	94	ACVRL1
OBS_BC_203280	V2LHS_259642	27.53	66.34	94	ACVRL1
OBS_BC_203281	V2LHS_94440	14.07	19	181	AGRP
OBS_BC_203281	V2LHS_94440	10.68	14.43	181	AGRP
OBS_BC_203283	V2LHS_198252	95.84	95.87	143	PARP4
OBS_BC_203283	V2LHS_198252	93.49	52.5	143	PARP4
OBS_BC_203288	V2LHS_169888	57.92	44.09	5207	PFKFB1
OBS_BC_203288	V2LHS_169888	52.42	18.75	5207	PFKFB1
OBS_BC_203289	V2LHS_223799	94.63	92.91	2921	CXCL3
OBS_BC_203289	V2LHS_223799	94.1	79.01	2921	CXCL3
OBS_BC_203291	V2LHS_73997	94.18	63.01	9949	AMMECR1
OBS_BC_203297	V2LHS_112011	58.71	66.93	185	AGTR1
OBS_BC_203297	V2LHS_112011	46.09	57.62	185	AGTR1
OBS_BC_203298	V2LHS_116855	62.8	82.61	81502, 100101490	HM13, PSIMCT-1
OBS_BC_203298	V2LHS_116855	50.78	31.53	81502, 100101490	HM13, PSIMCT-1
OBS_BC_203301	V2LHS_196156	53.13	15.48	401138	AMTN
OBS_BC_203301	V2LHS_196156	32.11	12.87	401138	AMTN
OBS_BC_203308	V2LHS_170527	87.51	85.76	5603	MAPK13
OBS_BC_203308	V2LHS_170527	67.85	51.55	5603	MAPK13
OBS_BC_203309	V2LHS_117259	72.52	91.26	83548	COG3
OBS_BC_203313	V2LHS_113776	96.71	94.28	2091	FBL
OBS_BC_203313	V2LHS_113776	94.82	87.04	2091	FBL
OBS_BC_203317	V2LHS_70276	28	44.33	10344	CCL26
OBS_BC_203317	V2LHS_70276	26.53	21.4	10344	CCL26
OBS_BC_203324	V2LHS_43734	65.53	19.25	1436	CSF1R
OBS_BC_203324	V2LHS_43734	52.31	18.79	1436	CSF1R
OBS_BC_203329	V2LHS_86752	56.73	96.41	91156	IGFN1
OBS_BC_203331	V2LHS_256515	68.3	59.27	8566	PDXK
OBS_BC_203331	V2LHS_256515	58.6	32.21	8566	PDXK
OBS_BC_203332	V2LHS_169281	73.85	61.03	1337	COX6A1
OBS_BC_203340	V2LHS_63381	62.29	51.53	90990	KIFC2
OBS_BC_203340	V2LHS_63381	19.23	31.4	90990	KIFC2
OBS_BC_203344	V2LHS_170752	84.59	67.52	5698	PSMB9
OBS_BC_203344	V2LHS_170752	55.86	47.07	5698	PSMB9
OBS_BC_203348	V2LHS_82335	96.24	82.21	668	FOXL2
OBS_BC_203348	V2LHS_82335	81.73	81.49	668	FOXL2
OBS_BC_203350	V2LHS_113983	47.65	36.32	2531	KDSR
OBS_BC_203350	V2LHS_113983	36	36.17	2531	KDSR
OBS_BC_203352	V2LHS_24225	52.55	72.1	50652	PCA3
OBS_BC_203352	V2LHS_24225	35.89	31.08	50652	PCA3
OBS_BC_203353	V2LHS_175115	99.29	85.95	55315	SLC29A3
OBS_BC_203353	V2LHS_175115	96.8	82.74	55315	SLC29A3
OBS_BC_203354	V2LHS_180732	7.2	30.29	1260	CNGA2
OBS_BC_203356	V2LHS_57299	88.85	94.63	5533	PPP3CC
OBS_BC_203356	V2LHS_57299	66.06	92.57	5533	PPP3CC
OBS_BC_203358	V2LHS_280621	33.59	34.88	11335, 653972	CBX3, LOC653972
OBS_BC_203358	V2LHS_280621	19.03	12.65	11335, 653972	CBX3, LOC653972
OBS_BC_203359	V2LHS_244577	81.26	71.06	89777	SERPINB12
OBS_BC_203359	V2LHS_244577	67.69	63.9	89777	SERPINB12
OBS_BC_203364	V2LHS_202346	67.37	75.99	11056	DDX52
OBS_BC_203364	V2LHS_202346	64.26	70.3	11056	DDX52
OBS_BC_203372	V2LHS_233698	10.59	90.46	6557	SLC12A1
OBS_BC_203372	V2LHS_233698	9.13	85.74	6557	SLC12A1
OBS_BC_203379	V2LHS_170221	72.95	70.89	5428	POLG
OBS_BC_203379	V2LHS_170221	69.14	65.38	5428	POLG
OBS_BC_203382	V2LHS_32443	87.96	82.52	9949	AMMECR1
OBS_BC_203382	V2LHS_32443	80.77	72.18	9949	AMMECR1
OBS_BC_203394	V2LHS_90838	48.15	36.46	10813	UTP14A
OBS_BC_203394	V2LHS_90838	38.7	19.1	10813	UTP14A
OBS_BC_203395	V2LHS_192668	79.49	59.73	6191, 220433, 442162, 646269, 100128140	RPS4X, LOC220433, LOC442162, LOC646269, LOC100128140
OBS_BC_203395	V2LHS_192668	56.86	26.93	6191, 220433, 442162, 646269, 100128140	RPS4X, LOC220433, LOC442162, LOC646269, LOC100128140
OBS_BC_203396	V2LHS_197514	98.94	90.91	3652	IPP
OBS_BC_203396	V2LHS_197514	86.27	89.57	3652	IPP
OBS_BC_203401	V2LHS_196832	74.93	86.87	4522	MTHFD1
OBS_BC_203401	V2LHS_196832	68.9	82.55	4522	MTHFD1
OBS_BC_203406	V2LHS_197976	92.21	90.75	10124, 644860	ARL4A, LOC644860
OBS_BC_203407	V2LHS_137324	76.5	87.48	-	-
OBS_BC_203407	V2LHS_137324	71.48	38.73	-	-
OBS_BC_203410	V2LHS_115240	53.2	42.19	1007	CDH9
OBS_BC_203410	V2LHS_115240	36.86	36.41	1007	CDH9
OBS_BC_203411	V2LHS_56655	36.74	41.04	160760	PPTC7
OBS_BC_203411	V2LHS_56655	28.39	34.7	160760	PPTC7
OBS_BC_203412	V2LHS_149974	73.24	81.72	10772, 642558, 653884	FUSIP1, LOC642558, LOC653884
OBS_BC_203422	V2LHS_201718	20.47	99.25	51755	CRKRS
OBS_BC_203422	V2LHS_201718	19.42	97.3	51755	CRKRS
OBS_BC_203429	V2LHS_161315	52.89	65.49	9673	SLC25A44
OBS_BC_203429	V2LHS_161315	39.93	49.05	9673	SLC25A44
OBS_BC_203430	V2LHS_33181	40.1	92.93	8396	PIP4K2B
OBS_BC_203430	V2LHS_33181	32.87	83.34	8396	PIP4K2B
OBS_BC_203433	V2LHS_174712	46.46	68.13	55040	EPN3
OBS_BC_203433	V2LHS_174712	40.33	49.37	55040	EPN3
OBS_BC_203437	V2LHS_216712	41.85	26.76	27113	BBC3
OBS_BC_203437	V2LHS_216712	33.61	24.78	27113	BBC3
OBS_BC_203439	V2LHS_231136	97.42	78.27	7274	TTPA
OBS_BC_203439	V2LHS_231136	96.99	74.74	7274	TTPA
OBS_BC_203441	V2LHS_114193	27.17	77.45	2799	GNS
OBS_BC_203441	V2LHS_114193	25.56	46.18	2799	GNS
OBS_BC_203443	V2LHS_82518	57.31	74.38	3098	HK1
OBS_BC_203449	V2LHS_20637	93.36	88.09	6431, 644422	SFRS6, LOC644422
OBS_BC_203449	V2LHS_20637	89.46	83.94	6431, 644422	SFRS6, LOC644422
OBS_BC_203452	V2LHS_72555	96.25	48.31	4734	NEDD4
OBS_BC_203452	V2LHS_72555	87.71	37.23	4734	NEDD4
OBS_BC_203454	V2LHS_198456	98.81	86.49	23533	PIK3R5
OBS_BC_203454	V2LHS_198456	96.66	77.59	23533	PIK3R5
OBS_BC_203461	V2LHS_223874	31.31	26.07	5908, 643752	RAP1B, hCG_1757335
OBS_BC_203461	V2LHS_223874	26.94	25.63	5908, 643752	RAP1B, hCG_1757335
OBS_BC_203462	V2LHS_86017	68.18	58.2	22794	CASC3
OBS_BC_203462	V2LHS_86017	67.55	33.13	22794	CASC3
OBS_BC_203471	V2LHS_47603	54.28	40.35	-	-
OBS_BC_203473	V2LHS_279585	58.8	33.07	1347	COX7A2
OBS_BC_203473	V2LHS_279585	45.2	30.76	1347	COX7A2
OBS_BC_203483	V2LHS_171206	66.52	88.48	5893	RAD52
OBS_BC_203485	V2LHS_222123	57.83	70.36	10434	LYPLA1
OBS_BC_203485	V2LHS_222123	46.02	58.37	10434	LYPLA1
OBS_BC_203491	V2LHS_139015	10.75	21.62	89782	LMLN
OBS_BC_203493	V2LHS_284800	76.88	59.72	717	C2
OBS_BC_203493	V2LHS_284800	70.04	54.37	717	C2
OBS_BC_203494	V2LHS_153462	86.69	71.32	6717	SRI
OBS_BC_203495	V2LHS_56192	98.26	92.08	7158	TP53BP1
OBS_BC_203496	V2LHS_88200	68.77	89.93	27287, 391518	VENTX, VENTXP7
OBS_BC_203496	V2LHS_88200	64.39	64.98	27287, 391518	VENTX, VENTXP7
OBS_BC_203503	V2LHS_149710	63.22	34.06	11052	CPSF6
OBS_BC_203503	V2LHS_149710	55.89	29.46	11052	CPSF6
OBS_BC_203512	V2LHS_168977	68.93	91.53	-	-
OBS_BC_203512	V2LHS_168977	48.03	35.58	-	-
OBS_BC_203515	V2LHS_96486	99.63	93.26	25885	POLR1A
OBS_BC_203515	V2LHS_96486	87.69	87.05	25885	POLR1A
OBS_BC_203520	V2LHS_12573	67.13	62.57	10735	STAG2
OBS_BC_203525	V2LHS_97726	94.93	84.54	50804	MYEF2
OBS_BC_203525	V2LHS_97726	94.58	75.49	50804	MYEF2
OBS_BC_203534	V2LHS_199779	30.08	86.68	10103	TSPAN1
OBS_BC_203534	V2LHS_199779	28.7	69.47	10103	TSPAN1
OBS_BC_203535	V2LHS_214314	96.33	92.81	64100	ELSPBP1
OBS_BC_203535	V2LHS_214314	90	85.61	64100	ELSPBP1
OBS_BC_203542	V2LHS_111206	73.52	61.3	30847	CECR9
OBS_BC_203542	V2LHS_111206	69.97	45.48	30847	CECR9
OBS_BC_203544	V2LHS_98263	48.55	24.17	64750	SMURF2
OBS_BC_203545	V2LHS_232725	89.44	76.49	41	ACCN2
OBS_BC_203545	V2LHS_232725	82.29	45.19	41	ACCN2
OBS_BC_203548	V2LHS_254383	87.39	87.47	23013	SPEN
OBS_BC_203548	V2LHS_254383	78.29	84.01	23013	SPEN
OBS_BC_203563	V2LHS_117015	49.07	8.69	81578	COL21A1
OBS_BC_203563	V2LHS_117015	39.38	7.93	81578	COL21A1
OBS_BC_203564	V2LHS_16487	80.38	96.78	8823	FGF16
OBS_BC_203565	V2LHS_72138	35.25	52.82	7386, 100128525	UQCRFS1, LOC100128525
OBS_BC_203565	V2LHS_72138	29.09	45.5	7386, 100128525	UQCRFS1, LOC100128525
OBS_BC_203574	V2LHS_193568	87.01	63.07	7903	ST8SIA4
OBS_BC_203574	V2LHS_193568	64.03	55.77	7903	ST8SIA4
OBS_BC_203579	V2LHS_116162	88.23	91.89	64844	2010-03-07
OBS_BC_203579	V2LHS_116162	80.45	80.22	64844	2010-03-07
OBS_BC_203585	V2LHS_94392	31.8	48.53	164	AP1G1
OBS_BC_203585	V2LHS_94392	30.44	44.17	164	AP1G1
OBS_BC_203591	V2LHS_42276	51.29	58.78	114907	FBXO32
OBS_BC_203591	V2LHS_42276	47	55.83	114907	FBXO32
OBS_BC_203594	V2LHS_71311	99.95	76.36	9578	CDC42BPB
OBS_BC_203594	V2LHS_71311	95.92	73.74	9578	CDC42BPB
OBS_BC_203598	V2LHS_246347	16.02	13.64	56893	UBQLN4
OBS_BC_203598	V2LHS_246347	14.6	2.01	56893	UBQLN4
OBS_BC_203609	V2LHS_218225	70.37	49.84	80012	PHC3
OBS_BC_203609	V2LHS_218225	64.24	41.61	80012	PHC3
OBS_BC_203610	V2LHS_193445	6.26	6.33	-	-
OBS_BC_203610	V2LHS_193445	5.56	2.93	-	-
OBS_BC_203614	V2LHS_171076	41.69	49.56	5824	PEX19
OBS_BC_203614	V2LHS_171076	31.44	39.72	5824	PEX19
OBS_BC_203617	V2LHS_202692	13.31	42.02	146057	TTBK2
OBS_BC_203617	V2LHS_202692	13.05	27.75	146057	TTBK2
OBS_BC_203620	V2LHS_137673	50.99	44.23	81616	ACSBG2
OBS_BC_203620	V2LHS_137673	35.03	33.49	81616	ACSBG2
OBS_BC_203623	V2LHS_68537	99.37	88.01	55636	CHD7
OBS_BC_203623	V2LHS_68537	97.52	81.94	55636	CHD7
OBS_BC_203624	V2LHS_254184	67.68	59.06	11104	KATNA1
OBS_BC_203624	V2LHS_254184	65.1	55.96	11104	KATNA1
OBS_BC_203625	V2LHS_132866	13.42	42.88	528	ATP6V1C1
OBS_BC_203625	V2LHS_132866	11.48	19.67	528	ATP6V1C1
OBS_BC_203628	V2LHS_228887	75.92	69.34	546, 652455, 728849	ATRX, LOC652455, LOC728849
OBS_BC_203632	V2LHS_43601	95.89	96.36	26206	SPAG8
OBS_BC_203632	V2LHS_43601	77.82	56.69	26206	SPAG8
OBS_BC_203633	V2LHS_263325	79.27	85.3	98	ACYP2
OBS_BC_203633	V2LHS_263325	77.86	71.56	98	ACYP2
OBS_BC_203637	V2LHS_31263	99.85	87.43	6352	CCL5
OBS_BC_203637	V2LHS_31263	99.07	82.25	6352	CCL5
OBS_BC_203640	V2LHS_139100	25.02	93.83	65217	PCDH15
OBS_BC_203640	V2LHS_139100	24.31	92.34	65217	PCDH15
[truncated: 9,673 more rows]

## Sheet: V1A002
Barcode ID	pGIPZ Oligo ID	CY5/CY3 rank% (Exp.1)	CY5/CY3 rank% (Exp.2)	Gene ID	Gene Symbol
OBS_BC_200127	V2LHS_170966	3.02	2.83	5788	PTPRC
OBS_BC_200127	V2LHS_170966	2.89	0.81	5788	PTPRC
OBS_BC_200187	V2LHS_171761	33.77	46.98	7326	UBE2G1
OBS_BC_200187	V2LHS_171761	23.73	31.94	7326	UBE2G1
OBS_BC_200202	V2LHS_177901	2.54	3.59	114294	LACTB
OBS_BC_200202	V2LHS_177901	0.77	1.95	114294	LACTB
OBS_BC_200485	V2LHS_172671	2.01	3.36	388	RHOB
OBS_BC_200485	V2LHS_172671	1	3.19	388	RHOB
OBS_BC_200721	V2LHS_207306	80.28	67.4	10557	RPP38
OBS_BC_200721	V2LHS_207306	68.96	64.12	10557	RPP38
OBS_BC_200957	V2LHS_171717	0.39	2.16	7317	UBA1
OBS_BC_200957	V2LHS_171717	0.23	2.15	7317	UBA1
OBS_BC_200985	V2LHS_171896	12.49	18.46	7408	VASP
OBS_BC_201027	V2LHS_121585	3.35	7.73	1845	DUSP3
OBS_BC_201027	V2LHS_121585	2.82	1.86	1845	DUSP3
OBS_BC_201171	V2LHS_45839	4.11	7.62	121536	AEBP2
OBS_BC_201171	V2LHS_45839	3.25	4.94	121536	AEBP2
OBS_BC_201426	V2LHS_173238	47.06	12.85	4998	ORC1L
OBS_BC_201664	V2LHS_178967	0.36	6.36	285195	SLC9A9
OBS_BC_201707	V2LHS_175492	1.36	9.03	55808	ST6GALNAC1
OBS_BC_201707	V2LHS_175492	0.38	1.73	55808	ST6GALNAC1
OBS_BC_201742	V2LHS_93886	14.23	20.37	6241	RRM2
OBS_BC_201742	V2LHS_93886	10.15	15.93	6241	RRM2
OBS_BC_201756	V2LHS_42709	87.07	84.96	6810	STX4
OBS_BC_201821	V2LHS_43052	0.81	6.62	201799	TMEM154
OBS_BC_201821	V2LHS_43052	0.62	0.67	201799	TMEM154
OBS_BC_201880	V2LHS_43516	1.48	1.01	23626	SPO11
OBS_BC_201880	V2LHS_43516	0.92	0.58	23626	SPO11
OBS_BC_201894	V2LHS_116743	0.23	3.45	80709	AKNA
OBS_BC_201919	V2LHS_258974	1.86	4.89	3709	ITPR2
OBS_BC_201919	V2LHS_258974	1.02	2.44	3709	ITPR2
OBS_BC_202220	V2LHS_218823	78.51	81.89	200728	TMEM17
OBS_BC_202220	V2LHS_218823	66.17	79	200728	TMEM17
OBS_BC_202227	V2LHS_258882	6.53	76.6	4644	MYO5A
OBS_BC_202229	V2LHS_208471	92.42	25.37	64094	SMOC2
OBS_BC_202241	V2LHS_90367	74.26	90.06	10874	NMU
OBS_BC_202241	V2LHS_90367	65.96	66.8	10874	NMU
OBS_BC_202260	V2LHS_92953	64.27	74.23	3849	KRT2
OBS_BC_202260	V2LHS_92953	60.19	51.77	3849	KRT2
OBS_BC_202282	V2LHS_261909	64.21	76.85	6329	SCN4A
OBS_BC_202282	V2LHS_261909	54.26	60.66	6329	SCN4A
OBS_BC_202297	V2LHS_114902	45.32	82.11	51585	PCF11
OBS_BC_202297	V2LHS_114902	37.23	77.22	51585	PCF11
OBS_BC_202344	V2LHS_199380	11.51	31.69	10553	HTATIP2
OBS_BC_202344	V2LHS_199380	9.53	26.9	10553	HTATIP2
OBS_BC_202347	V2LHS_157742	43.83	75.24	79833	GEMIN6
OBS_BC_202347	V2LHS_157742	40.8	65.09	79833	GEMIN6
OBS_BC_202356	V2LHS_93126	91.76	95.6	6528	SLC5A5
OBS_BC_202356	V2LHS_93126	82.58	84.32	6528	SLC5A5
OBS_BC_202377	V2LHS_243025	34.76	61.45	572	BAD
OBS_BC_202377	V2LHS_243025	20.17	51.53	572	BAD
OBS_BC_202388	V2LHS_131700	11.75	13.19	2167	FABP4
OBS_BC_202388	V2LHS_131700	9.75	10.2	2167	FABP4
OBS_BC_202396	V2LHS_56777	20.7	17.03	6355	CCL8
OBS_BC_202396	V2LHS_56777	18.65	14.97	6355	CCL8
OBS_BC_202410	V2LHS_190996	36.2	0.89	10047	CST8
OBS_BC_202410	V2LHS_190996	34.79	0.66	10047	CST8
OBS_BC_202419	V2LHS_15359	52.9	50.13	444	ASPH
OBS_BC_202419	V2LHS_15359	40.11	48.4	444	ASPH
OBS_BC_202420	V2LHS_93855	0.94	2.69	6230, 100131196	RPS25, LOC100131196
OBS_BC_202420	V2LHS_93855	0.33	1.78	6230, 100131196	RPS25, LOC100131196
OBS_BC_202423	V2LHS_218437	92.7	97.87	54555	DDX49
OBS_BC_202431	V2LHS_94168	11.53	68.52	21	ABCA3
OBS_BC_202431	V2LHS_94168	7.49	32.28	21	ABCA3
OBS_BC_202456	V2LHS_38098	1.28	4.46	2965	GTF2H1
OBS_BC_202473	V2LHS_180376	91.63	74.99	375318, 653437	AQP12A, AQP12B
OBS_BC_202473	V2LHS_180376	77.85	41.5	375318, 653437	AQP12A, AQP12B
OBS_BC_202495	V2LHS_115883	5.47	59.77	1315	COPB1
OBS_BC_202495	V2LHS_115883	4.9	53.14	1315	COPB1
OBS_BC_202503	V2LHS_42050	49.11	83.65	2828	GPR4
OBS_BC_202503	V2LHS_42050	41.32	82.18	2828	GPR4
OBS_BC_202518	V2LHS_243214	82.81	61.44	4640	MYO1A
OBS_BC_202518	V2LHS_243214	66.35	55.76	4640	MYO1A
OBS_BC_202523	V2LHS_112308	83.72	83.99	1081	CGA
OBS_BC_202523	V2LHS_112308	73.36	67.76	1081	CGA
OBS_BC_202526	V2LHS_257376	49.12	34.73	64374	SIL1
OBS_BC_202526	V2LHS_257376	42.99	16.99	64374	SIL1
OBS_BC_202550	V2LHS_202494	53.41	7.65	7535	ZAP70
OBS_BC_202550	V2LHS_202494	49.23	6.94	7535	ZAP70
OBS_BC_202572	V2LHS_62138	11.1	30.25	1497	CTNS
OBS_BC_202572	V2LHS_62138	9.96	28.37	1497	CTNS
OBS_BC_202604	V2LHS_174414	47.98	24.47	55662	HIF1AN
OBS_BC_202609	V2LHS_218774	27.26	37.05	567	B2M
OBS_BC_202609	V2LHS_218774	21.14	19.81	567	B2M
OBS_BC_202630	V2LHS_233373	63.69	67.98	9852	EPM2AIP1
OBS_BC_202630	V2LHS_233373	61.61	33.78	9852	EPM2AIP1
OBS_BC_202635	V2LHS_239042	53.15	86.06	51776	ZAK
OBS_BC_202635	V2LHS_239042	38.68	67.04	51776	ZAK
OBS_BC_202644	V2LHS_225776	45.29	54.79	64863	METTL4
OBS_BC_202644	V2LHS_225776	44.17	39.58	64863	METTL4
OBS_BC_202659	V2LHS_72140	96.25	1.94	7386, 100128525	UQCRFS1, LOC100128525
OBS_BC_202659	V2LHS_72140	95.16	1.39	7386, 100128525	UQCRFS1, LOC100128525
OBS_BC_202664	V2LHS_71313	50.59	27.1	9578	CDC42BPB
OBS_BC_202692	V2LHS_113712	80.41	71.62	2012	EMP1
OBS_BC_202692	V2LHS_113712	55.88	43.84	2012	EMP1
OBS_BC_202699	V2LHS_44275	72.62	76.21	167227	DCP2
OBS_BC_202704	V2LHS_171400	93.78	85.31	7111	TMOD1
OBS_BC_202704	V2LHS_171400	92.03	70.06	7111	TMOD1
OBS_BC_202706	V2LHS_18474	71.62	63.54	9700	ESPL1
OBS_BC_202706	V2LHS_18474	53.79	55.16	9700	ESPL1
OBS_BC_202708	V2LHS_49267	36.85	16.48	9374	PPT2
OBS_BC_202708	V2LHS_49267	33.29	15.59	9374	PPT2
OBS_BC_202725	V2LHS_27043	78.79	36.68	8573	CASK
OBS_BC_202725	V2LHS_27043	62.44	26.01	8573	CASK
OBS_BC_202746	V2LHS_64880	29.95	28.18	940	CD28
OBS_BC_202746	V2LHS_64880	26.62	17.86	940	CD28
OBS_BC_202754	V2LHS_175422	58.98	71.36	55351	STK32B
OBS_BC_202754	V2LHS_175422	57.11	54.79	55351	STK32B
OBS_BC_202755	V2LHS_89028	71.25	54.9	54464	XRN1
OBS_BC_202755	V2LHS_89028	63.1	51.64	54464	XRN1
OBS_BC_202800	V2LHS_137258	81.21	83.69	80235	PIGZ
OBS_BC_202816	V2LHS_215411	54.6	44.83	26355	C3orf28
OBS_BC_202816	V2LHS_215411	48.21	27.39	26355	C3orf28
OBS_BC_202817	V2LHS_203159	9.39	85.29	7335, 387522	UBE2V1, TMEM189-UBE2V1
OBS_BC_202817	V2LHS_203159	7.43	77.95	7335, 387522	UBE2V1, TMEM189-UBE2V1
OBS_BC_202827	V2LHS_91536	90.4	36.48	11330	CTRC
OBS_BC_202827	V2LHS_91536	88.31	10.49	11330	CTRC
OBS_BC_202860	V2LHS_173318	86.15	56.79	6389	SDHA
OBS_BC_202890	V2LHS_111565	57.42	93.58	730	C7
OBS_BC_202890	V2LHS_111565	34.84	86.39	730	C7
OBS_BC_202902	V2LHS_263904	45.37	58.26	771	CA12
OBS_BC_202902	V2LHS_263904	37.99	54.84	771	CA12
OBS_BC_202923	V2LHS_196275	3.88	89.76	10329	TMEM5
OBS_BC_202924	V2LHS_172016	90.65	96.49	7474	WNT5A
OBS_BC_202924	V2LHS_172016	88.75	96.33	7474	WNT5A
OBS_BC_202928	V2LHS_179132	2.07	5.16	286046	XKR6
OBS_BC_202928	V2LHS_179132	0.77	4.63	286046	XKR6
OBS_BC_202945	V2LHS_43933	89.94	77.15	1326	MAP3K8
OBS_BC_202945	V2LHS_43933	75.34	72.07	1326	MAP3K8
OBS_BC_202947	V2LHS_151010	1.17	3.51	1491	CTH
OBS_BC_202950	V2LHS_98079	73.46	97.18	6581	SLC22A3
OBS_BC_202950	V2LHS_98079	67.43	93.13	6581	SLC22A3
OBS_BC_202958	V2LHS_88736	76.87	58.12	1130	LYST
OBS_BC_202958	V2LHS_88736	56.71	29.08	1130	LYST
OBS_BC_202964	V2LHS_219274	84.95	53.83	5771	PTPN2
OBS_BC_202964	V2LHS_219274	68.84	51.62	5771	PTPN2
OBS_BC_202966	V2LHS_137615	2.47	4.84	81605	URM1
OBS_BC_202972	V2LHS_267027	52.38	39.3	-	-
OBS_BC_202972	V2LHS_267027	37.32	34.23	-	-
OBS_BC_202995	V2LHS_171100	59.58	84.1	5833, 653414	PCYT2, LOC653414
OBS_BC_202995	V2LHS_171100	54.1	81.21	5833, 653414	PCYT2, LOC653414
OBS_BC_203001	V2LHS_62171	52.46	24.03	1013	CDH15
OBS_BC_203001	V2LHS_62171	41.14	20.29	1013	CDH15
OBS_BC_203014	V2LHS_155387	60.15	24.21	55107	TMEM16A
OBS_BC_203027	V2LHS_169903	88.53	64.33	5214	PFKP
OBS_BC_203027	V2LHS_169903	71.83	36.7	5214	PFKP
OBS_BC_203046	V2LHS_154244	91.47	71.9	51091	SEPSECS
OBS_BC_203046	V2LHS_154244	55.35	65.62	51091	SEPSECS
OBS_BC_203064	V2LHS_25206	93.64	95.85	23621	BACE1
OBS_BC_203064	V2LHS_25206	67.97	92.19	23621	BACE1
OBS_BC_203065	V2LHS_114574	27.91	67.11	4616	GADD45B
OBS_BC_203065	V2LHS_114574	16.32	52.97	4616	GADD45B
OBS_BC_203076	V2LHS_113020	71.52	20.13	1147	CHUK
OBS_BC_203076	V2LHS_113020	66.61	17.36	1147	CHUK
OBS_BC_203081	V2LHS_80551	31.5	17.92	7350	UCP1
OBS_BC_203081	V2LHS_80551	20.8	15.95	7350	UCP1
OBS_BC_203096	V2LHS_201643	28.97	36.22	6431, 644422	SFRS6, LOC644422
OBS_BC_203098	V2LHS_115188	93.68	74.39	51176	LEF1
OBS_BC_203098	V2LHS_115188	91.37	69.15	51176	LEF1
OBS_BC_203107	V2LHS_97282	48.54	51.01	51012	SLMO2
OBS_BC_203113	V2LHS_176400	16.29	10.13	54517	PUS7
OBS_BC_203113	V2LHS_176400	6.03	3.69	54517	PUS7
OBS_BC_203115	V2LHS_197313	33.31	16.81	10982	MAPRE2
OBS_BC_203115	V2LHS_197313	24.06	15.08	10982	MAPRE2
OBS_BC_203130	V2LHS_97780	57.43	95.85	51399	TRAPPC4
OBS_BC_203130	V2LHS_97780	29.32	92.94	51399	TRAPPC4
OBS_BC_203140	V2LHS_120224	9.18	9.53	197259, 732371	MLKL, LOC732371
OBS_BC_203140	V2LHS_120224	8.84	8.99	197259, 732371	MLKL, LOC732371
OBS_BC_203154	V2LHS_225629	70.69	47.75	79368	FCRL2
OBS_BC_203154	V2LHS_225629	45.3	42.19	79368	FCRL2
OBS_BC_203173	V2LHS_223883	88.64	85.07	1539	CYLC2
OBS_BC_203184	V2LHS_61359	93.09	75.38	3895	KTN1
OBS_BC_203184	V2LHS_61359	80.5	72.13	3895	KTN1
OBS_BC_203193	V2LHS_202575	80.18	52.07	84085	FBXO30
OBS_BC_203199	V2LHS_151525	57.12	90.72	2199	FBLN2
OBS_BC_203199	V2LHS_151525	45.44	79.28	2199	FBLN2
OBS_BC_203202	V2LHS_112498	49.89	39.15	1592	CYP26A1
OBS_BC_203247	V2LHS_229079	29.65	76.82	1244	ABCC2
OBS_BC_203247	V2LHS_229079	28.01	58.76	1244	ABCC2
OBS_BC_203252	V2LHS_115051	59.17	92.14	51434	ANAPC7
OBS_BC_203252	V2LHS_115051	51.64	85.51	51434	ANAPC7
OBS_BC_203255	V2LHS_136315	7.03	38.65	79608	RIC3
OBS_BC_203255	V2LHS_136315	5.63	28.47	79608	RIC3
OBS_BC_203257	V2LHS_203252	77.42	1.11	3845	KRAS
OBS_BC_203285	V2LHS_178078	28.97	52.52	84976	DISP1
OBS_BC_203285	V2LHS_178078	20.92	42.94	84976	DISP1
OBS_BC_203403	V2LHS_282309	11.32	4.11	79947	DHDDS
OBS_BC_203403	V2LHS_282309	7.65	2.84	79947	DHDDS
OBS_BC_203423	V2LHS_62188	46.38	68.46	1020	CDK5
OBS_BC_203423	V2LHS_62188	43.73	64.14	1020	CDK5
OBS_BC_203431	V2LHS_68243	50.53	53.98	9439	MED23
OBS_BC_203431	V2LHS_68243	50.53	47.42	9439	MED23
OBS_BC_203434	V2LHS_221858	19.6	99	7399	USH2A
OBS_BC_203434	V2LHS_221858	10.41	98.77	7399	USH2A
OBS_BC_203435	V2LHS_48704	65.99	60.44	-	-
OBS_BC_203436	V2LHS_203526	0.65	3.62	2736	GLI2
OBS_BC_203436	V2LHS_203526	0.55	0.3	2736	GLI2
OBS_BC_203458	V2LHS_36407	95.05	85.06	5161	PDHA2
OBS_BC_203458	V2LHS_36407	91.28	59.08	5161	PDHA2
OBS_BC_203460	V2LHS_227071	0.3	1.54	3586	IL10
OBS_BC_203460	V2LHS_227071	0.1	0.45	3586	IL10
OBS_BC_203464	V2LHS_221343	20.14	23.27	55012	PPP2R3C
OBS_BC_203467	V2LHS_60488	78.83	90.79	58497	PRUNE
OBS_BC_203467	V2LHS_60488	76.51	90.16	58497	PRUNE
OBS_BC_203489	V2LHS_201960	51.06	87.4	11113	CIT
OBS_BC_203500	V2LHS_98214	1.23	1.86	27037	HTF9C
OBS_BC_203500	V2LHS_98214	0.5	1.12	27037	HTF9C
OBS_BC_203504	V2LHS_102188	77.36	98.07	55183	RIF1
OBS_BC_203536	V2LHS_43195	94.16	46.69	201456	FBXO15
OBS_BC_203538	V2LHS_82789	49	63.51	2821, 100133951	GPI, LOC100133951
OBS_BC_203538	V2LHS_82789	39.64	25.87	2821, 100133951	GPI, LOC100133951
OBS_BC_203554	V2LHS_96136	89.2	82.99	22871	NLGN1
OBS_BC_203554	V2LHS_96136	85.64	78.95	22871	NLGN1
OBS_BC_203571	V2LHS_12575	90.7	70.91	10741	RBBP9
OBS_BC_203571	V2LHS_12575	85.6	43.31	10741	RBBP9
OBS_BC_203578	V2LHS_53204	82.24	74.81	8832	CD84
OBS_BC_203578	V2LHS_53204	72.6	70.13	8832	CD84
OBS_BC_203583	V2LHS_260807	1.44	2.19	23327	NEDD4L
OBS_BC_203584	V2LHS_278899	40.86	87.31	6997	TDGF1
OBS_BC_203584	V2LHS_278899	16.54	80.13	6997	TDGF1
OBS_BC_203590	V2LHS_64727	33.56	27.81	26577	PCOLCE2
OBS_BC_203590	V2LHS_64727	17.13	22.93	26577	PCOLCE2
OBS_BC_203601	V2LHS_62136	39.76	96.53	1497	CTNS
OBS_BC_203601	V2LHS_62136	28.13	71.84	1497	CTNS
OBS_BC_203602	V2LHS_152208	32.03	76.53	4751, 401007, 642458, 644637	NEK2, LOC401007, LOC642458, LOC644637
OBS_BC_203602	V2LHS_152208	22.41	70.97	4751, 401007, 642458, 644637	NEK2, LOC401007, LOC642458, LOC644637
OBS_BC_203612	V2LHS_59321	18.67	42.64	170680	PSORS1C2
OBS_BC_203612	V2LHS_59321	17.29	29.2	170680	PSORS1C2
OBS_BC_203619	V2LHS_176960	10.12	78.76	80010	RMI1
OBS_BC_203619	V2LHS_176960	8.78	59.66	80010	RMI1
OBS_BC_203631	V2LHS_74026	84.59	21.33	9733	SART3
OBS_BC_203631	V2LHS_74026	77.72	18.63	9733	SART3
OBS_BC_203635	V2LHS_133767	43.48	84.63	3838, 146880, 728860	KPNA2, MGC40489, LOC728860
OBS_BC_203653	V2LHS_12728	98.04	81.35	26278	SACS
OBS_BC_203653	V2LHS_12728	93.56	45.24	26278	SACS
OBS_BC_203666	V2LHS_35320	32.9	41.27	9371	KIF3B
OBS_BC_203666	V2LHS_35320	27.43	38.7	9371	KIF3B
OBS_BC_203670	V2LHS_70647	23.91	46.68	10320	IKZF1
OBS_BC_203670	V2LHS_70647	22.37	20.2	10320	IKZF1
OBS_BC_203686	V2LHS_57182	0.92	26.37	5977	DPF2
OBS_BC_203686	V2LHS_57182	0.56	15.61	5977	DPF2
OBS_BC_203687	V2LHS_285857	99.42	10.28	128646	SIRPD
OBS_BC_203687	V2LHS_285857	95.28	3.72	128646	SIRPD
OBS_BC_203696	V2LHS_262600	3.54	13.79	3632	INPP5A
OBS_BC_203696	V2LHS_262600	2.21	6.18	3632	INPP5A
OBS_BC_203712	V2LHS_239167	87.62	48.46	1787	TRDMT1
OBS_BC_203712	V2LHS_239167	79.63	46.07	1787	TRDMT1
OBS_BC_203730	V2LHS_223769	79.02	46.18	1769	DNAH8
OBS_BC_203730	V2LHS_223769	75.66	32.03	1769	DNAH8
OBS_BC_203754	V2LHS_100616	78.03	78.36	4603	MYBL1
OBS_BC_203754	V2LHS_100616	74.37	53.47	4603	MYBL1
OBS_BC_203769	V2LHS_170531	63.72	98.73	5604	MAP2K1
OBS_BC_203783	V2LHS_202907	65.27	60.7	10383	TUBB2C
OBS_BC_203796	V2LHS_179605	30.77	93.36	-	-
OBS_BC_203796	V2LHS_179605	27.71	60.3	-	-
OBS_BC_203798	V2LHS_70583	79.53	28.86	6357	CCL13
OBS_BC_203798	V2LHS_70583	72.29	25.44	6357	CCL13
OBS_BC_203800	V2LHS_94462	63.23	39.59	265	AMELX
OBS_BC_203800	V2LHS_94462	59.4	37.79	265	AMELX
OBS_BC_203809	V2LHS_111583	40.29	49.62	3578	IL9
OBS_BC_203817	V2LHS_200334	88.43	82.56	51194, 100130733	IPO11, LOC100130733
OBS_BC_203817	V2LHS_200334	87.49	67.88	51194, 100130733	IPO11, LOC100130733
OBS_BC_203826	V2LHS_113136	60.92	22.02	1261	CNGA3
OBS_BC_203826	V2LHS_113136	60.43	15.56	1261	CNGA3
OBS_BC_203833	V2LHS_69820	87.24	92.95	121260	SLC15A4
OBS_BC_203833	V2LHS_69820	78.76	90.22	121260	SLC15A4
OBS_BC_203850	V2LHS_80759	7.22	75.29	64411	CENTD3
OBS_BC_203850	V2LHS_80759	6.19	64.36	64411	CENTD3
OBS_BC_203894	V2LHS_150190	13.97	27.81	799	CALCR
OBS_BC_203894	V2LHS_150190	11.07	17.01	799	CALCR
OBS_BC_203912	V2LHS_59579	29.57	14.38	28982	FLVCR1
OBS_BC_203912	V2LHS_59579	27.86	13.58	28982	FLVCR1
OBS_BC_203921	V2LHS_30511	28.22	75.57	27185	DISC1
OBS_BC_203921	V2LHS_30511	18.18	73.53	27185	DISC1
OBS_BC_203959	V2LHS_112595	64.99	50.71	651	BMP3
OBS_BC_203970	V2LHS_220750	56.31	48.69	85445	CNTNAP4
OBS_BC_203970	V2LHS_220750	55.38	34.88	85445	CNTNAP4
OBS_BC_203983	V2LHS_12477	86.15	98.75	6718	AKR1D1
OBS_BC_203983	V2LHS_12477	74.65	97.07	6718	AKR1D1
OBS_BC_204006	V2LHS_118515	71.13	40.23	84447	SYVN1
OBS_BC_204006	V2LHS_118515	58.45	39.44	84447	SYVN1
OBS_BC_204024	V2LHS_75576	30.13	11.37	5191	PEX7
OBS_BC_204024	V2LHS_75576	18.64	9.21	5191	PEX7
OBS_BC_204030	V2LHS_118069	56.61	95.36	51808	RNUXA
OBS_BC_204030	V2LHS_118069	43.41	71.25	51808	RNUXA
OBS_BC_204032	V2LHS_53218	62.67	68.24	8833	GMPS
OBS_BC_204032	V2LHS_53218	55.2	63.05	8833	GMPS
OBS_BC_204041	V2LHS_152267	1.64	4.93	4811	NID1
OBS_BC_204045	V2LHS_202930	96.55	39.33	9585	MPHOSPH1
OBS_BC_204051	V2LHS_87827	90.67	59.96	23155	CLCC1
OBS_BC_204051	V2LHS_87827	77.87	56.17	23155	CLCC1
OBS_BC_204060	V2LHS_91158	4.55	0.75	11345	GABARAPL2
OBS_BC_204060	V2LHS_91158	4.14	0.17	11345	GABARAPL2
OBS_BC_204082	V2LHS_159021	42.7	78.24	64333	ARHGAP9
OBS_BC_204095	V2LHS_150063	10.19	61.81	660	BMX
OBS_BC_204095	V2LHS_150063	7.97	59.31	660	BMX
OBS_BC_204144	V2LHS_47787	29.25	35.92	8899	PRPF4B
OBS_BC_204144	V2LHS_47787	19.94	34.5	8899	PRPF4B
OBS_BC_204145	V2LHS_90023	73.87	50.64	10	NAT2
OBS_BC_204145	V2LHS_90023	34.23	40.21	10	NAT2
OBS_BC_204156	V2LHS_51043	69.35	94.5	56937	PMEPA1
OBS_BC_204156	V2LHS_51043	55.28	87.45	56937	PMEPA1
OBS_BC_204158	V2LHS_179410	27.72	5.96	283417, 349152, 442524, 646762	DPY19L2, DPY19L2P2, DPY19L2P3, LOC646762
OBS_BC_204158	V2LHS_179410	24.99	5.9	283417, 349152, 442524, 646762	DPY19L2, DPY19L2P2, DPY19L2P3, LOC646762
OBS_BC_204163	V2LHS_170131	37.77	88.9	5356	PLRG1
OBS_BC_204163	V2LHS_170131	33.91	70.4	5356	PLRG1
OBS_BC_204193	V2LHS_197150	21.11	36.14	3312	HSPA8
OBS_BC_204193	V2LHS_197150	12.44	28.31	3312	HSPA8
OBS_BC_204215	V2LHS_34666	24.96	60.12	5911	RAP2A
OBS_BC_204215	V2LHS_34666	12.46	49.15	5911	RAP2A
OBS_BC_204224	V2LHS_63009	37.97	75.2	9582	APOBEC3B
OBS_BC_204224	V2LHS_63009	24.76	54.57	9582	APOBEC3B
OBS_BC_204239	V2LHS_71189	30.81	46.46	10013	HDAC6
OBS_BC_204239	V2LHS_71189	30.2	38.12	10013	HDAC6
OBS_BC_204277	V2LHS_150132	42.24	57.22	696	BTN1A1
OBS_BC_204277	V2LHS_150132	31.91	49.27	696	BTN1A1
OBS_BC_204282	V2LHS_150907	24.19	43.21	1390	CREM
OBS_BC_204282	V2LHS_150907	23.98	40.47	1390	CREM
OBS_BC_204293	V2LHS_58102	19.55	4.45	26509	FER1L3
OBS_BC_204293	V2LHS_58102	15.51	4.32	26509	FER1L3
OBS_BC_204303	V2LHS_285292	13.47	85.8	360226	TESSP1
OBS_BC_204303	V2LHS_285292	11.56	82.42	360226	TESSP1
OBS_BC_204332	V2LHS_192423	10.94	30.83	64924	SLC30A5
OBS_BC_204332	V2LHS_192423	8.56	28.81	64924	SLC30A5
OBS_BC_204337	V2LHS_5810	51.73	8.8	10529	NEBL
OBS_BC_204351	V2LHS_131694	45.94	26.13	2166	FAAH
OBS_BC_204351	V2LHS_131694	35.25	23.49	2166	FAAH
OBS_BC_204354	V2LHS_229815	98.83	43.35	64802	NMNAT1
OBS_BC_204354	V2LHS_229815	97.21	34.48	64802	NMNAT1
OBS_BC_204360	V2LHS_96841	43.58	84.37	26003	GORASP2
OBS_BC_204407	V2LHS_135156	53.72	75.71	51301	GCNT4
OBS_BC_204407	V2LHS_135156	49.37	48.49	51301	GCNT4
OBS_BC_204410	V2LHS_14033	48.83	42.56	64422	ATG3
OBS_BC_204410	V2LHS_14033	32.54	38.17	64422	ATG3
OBS_BC_204428	V2LHS_172451	0.36	3.87	8065	CUL5
OBS_BC_204428	V2LHS_172451	0.02	0.49	8065	CUL5
OBS_BC_204435	V2LHS_115438	70.64	20.99	51192	CKLF
OBS_BC_204435	V2LHS_115438	39.43	15.23	51192	CKLF
OBS_BC_204455	V2LHS_172113	59.11	74.82	7545	ZIC1
OBS_BC_204455	V2LHS_172113	37.94	50.89	7545	ZIC1
OBS_BC_204459	V2LHS_132809	64.24	73.75	522	ATP5J
OBS_BC_204459	V2LHS_132809	56.12	60.43	522	ATP5J
OBS_BC_204461	V2LHS_91661	31.04	61.53	27315	FRAG1
OBS_BC_204461	V2LHS_91661	26.31	39.1	27315	FRAG1
OBS_BC_204467	V2LHS_47597	86.77	47.25	5867	RAB4A
OBS_BC_204467	V2LHS_47597	84.44	45.3	5867	RAB4A
OBS_BC_204468	V2LHS_20111	9.47	80.33	23411	SIRT1
OBS_BC_204471	V2LHS_111901	12.54	58.33	31	ACACA
OBS_BC_204473	V2LHS_28221	21.28	67.61	9333	TGM5
OBS_BC_204473	V2LHS_28221	18.43	62.45	9333	TGM5
OBS_BC_204488	V2LHS_179884	30.61	12.55	57546	PDP2
OBS_BC_204488	V2LHS_179884	22.93	6.38	57546	PDP2
OBS_BC_204513	V2LHS_72447	17.63	72.41	6565	SLC15A2
OBS_BC_204513	V2LHS_72447	15.54	51.16	6565	SLC15A2
OBS_BC_204524	V2LHS_68017	1.92	4.31	9466	IL27RA
OBS_BC_204524	V2LHS_68017	1.18	0.67	9466	IL27RA
OBS_BC_204546	V2LHS_201501	25.76	68.57	11122	PTPRT
OBS_BC_204546	V2LHS_201501	16.66	32.89	11122	PTPRT
OBS_BC_204547	V2LHS_116618	48.84	44.31	9317	PTER
OBS_BC_204551	V2LHS_173914	47.87	92.84	54926	UBE2R2
OBS_BC_204551	V2LHS_173914	28.7	74.93	54926	UBE2R2
OBS_BC_204558	V2LHS_113021	72.25	36.81	1147	CHUK
OBS_BC_204558	V2LHS_113021	45.73	25.09	1147	CHUK
OBS_BC_204578	V2LHS_243599	54.01	30.92	4189	DNAJB9
OBS_BC_204578	V2LHS_243599	40.16	24.62	4189	DNAJB9
OBS_BC_204600	V2LHS_177504	97.86	63.9	84868	HAVCR2
OBS_BC_204600	V2LHS_177504	86.06	47.04	84868	HAVCR2
OBS_BC_204687	V2LHS_112492	99.13	31.66	1591	CYP24A1
OBS_BC_204696	V2LHS_201270	82.03	87.38	23062	GGA2
OBS_BC_204696	V2LHS_201270	50.35	71.24	23062	GGA2
OBS_BC_204709	V2LHS_34338	22.77	74.05	151987, 727978, 100131360, 100131868, 100133326	PPP4R2, LOC727978, LOC100131360, LOC100131868, LOC100133326
OBS_BC_204709	V2LHS_34338	13.66	52.4	151987, 727978, 100131360, 100131868, 100133326	PPP4R2, LOC727978, LOC100131360, LOC100131868, LOC100133326
OBS_BC_204719	V2LHS_230816	15.24	4.99	6716	SRD5A2
OBS_BC_204719	V2LHS_230816	10.5	3.92	6716	SRD5A2
OBS_BC_204728	V2LHS_238973	85.19	73.54	2176	FANCC
OBS_BC_204728	V2LHS_238973	81.09	73.09	2176	FANCC
OBS_BC_204729	V2LHS_42191	76.07	79.67	7225	TRPC6
OBS_BC_204729	V2LHS_42191	75.55	73.59	7225	TRPC6
OBS_BC_204732	V2LHS_175851	60.24	60.67	55867	SLC22A11
OBS_BC_204732	V2LHS_175851	48.09	48.52	55867	SLC22A11
OBS_BC_204761	V2LHS_227374	75.92	23.58	196385	DNAH10
OBS_BC_204761	V2LHS_227374	71.8	20.28	196385	DNAH10
OBS_BC_204765	V2LHS_259043	21.72	26.34	22949	LTB4DH
OBS_BC_204765	V2LHS_259043	12.15	15.44	22949	LTB4DH
OBS_BC_204771	V2LHS_201033	43.54	49.79	59345	GNB4
OBS_BC_204780	V2LHS_92457	86.9	86.9	6557	SLC12A1
OBS_BC_204784	V2LHS_247010	57.91	84.29	9452	ITM2A
OBS_BC_204784	V2LHS_247010	54.27	82.3	9452	ITM2A
OBS_BC_204785	V2LHS_134650	72.68	82.27	51377	UCHL5
OBS_BC_204785	V2LHS_134650	54.1	80.74	51377	UCHL5
OBS_BC_204798	V2LHS_62080	44.42	44.5	1776	DNASE1L3
OBS_BC_204798	V2LHS_62080	43.74	33.19	1776	DNASE1L3
OBS_BC_204826	V2LHS_153072	25.13	63.92	6573	SLC19A1
OBS_BC_204826	V2LHS_153072	18.61	59.22	6573	SLC19A1
OBS_BC_204855	V2LHS_52421	47.45	19.55	56889	TM9SF3
OBS_BC_204855	V2LHS_52421	33.57	14.72	56889	TM9SF3
OBS_BC_204874	V2LHS_151509	92.87	89.62	2165	F13B
OBS_BC_204874	V2LHS_151509	80.3	87.75	2165	F13B
OBS_BC_204875	V2LHS_202398	52.86	92.04	7442	TRPV1
OBS_BC_204875	V2LHS_202398	40.63	77.48	7442	TRPV1
OBS_BC_204886	V2LHS_158957	25.31	44.02	84515	MCM8
OBS_BC_204886	V2LHS_158957	24.54	32.9	84515	MCM8
OBS_BC_204891	V2LHS_44765	32.69	69.74	85367	KIAA1652
OBS_BC_204892	V2LHS_212701	78.16	71.52	10728	PTGES3
OBS_BC_204892	V2LHS_212701	59.57	46.57	10728	PTGES3
OBS_BC_204897	V2LHS_18385	78.11	58.17	9771	RAPGEF5
OBS_BC_204897	V2LHS_18385	69.63	57.01	9771	RAPGEF5
OBS_BC_204902	V2LHS_41844	3.31	11.24	2838	GPR15
OBS_BC_204902	V2LHS_41844	3.3	5.02	2838	GPR15
OBS_BC_204904	V2LHS_34024	20.65	10.28	420	ART4
OBS_BC_204904	V2LHS_34024	12.83	8.23	420	ART4
OBS_BC_204908	V2LHS_199799	33.53	13.18	6899	TBX1
OBS_BC_204908	V2LHS_199799	26.36	10.03	6899	TBX1
OBS_BC_204911	V2LHS_94338	35.19	75.87	117	ADCYAP1R1
OBS_BC_204914	V2LHS_80283	73.24	85.01	3233	HOXD4
OBS_BC_204914	V2LHS_80283	45.67	69.13	3233	HOXD4
OBS_BC_204937	V2LHS_80481	42.93	41.52	23406	COTL1
OBS_BC_204937	V2LHS_80481	24.7	34.42	23406	COTL1
OBS_BC_204940	V2LHS_240053	30.98	32.31	253430	IPMK
OBS_BC_204940	V2LHS_240053	26.13	22.01	253430	IPMK
OBS_BC_204944	V2LHS_116405	15.62	71.66	79077	XTP3TPA
OBS_BC_204944	V2LHS_116405	9.31	62.54	79077	XTP3TPA
OBS_BC_204959	V2LHS_250473	95.42	92.39	27241	BBS9
OBS_BC_204962	V2LHS_149470	67.81	65.89	85464	SSH2
OBS_BC_204962	V2LHS_149470	64.98	36.54	85464	SSH2
OBS_BC_204966	V2LHS_30346	63.36	62.69	6954	TCP11
OBS_BC_204966	V2LHS_30346	48.37	61.27	6954	TCP11
OBS_BC_204968	V2LHS_83990	9.06	25.16	1910	EDNRB
OBS_BC_204968	V2LHS_83990	7.96	19.31	1910	EDNRB
OBS_BC_204990	V2LHS_156003	45.93	32.97	55723	ASF1B
OBS_BC_204990	V2LHS_156003	37.01	31.22	55723	ASF1B
OBS_BC_204999	V2LHS_87221	82.28	18.82	23209	MLC1
OBS_BC_205007	V2LHS_224211	99.06	98.45	5800	PTPRO
OBS_BC_205007	V2LHS_224211	96.7	96.19	5800	PTPRO
OBS_BC_205018	V2LHS_60458	6.09	38.82	58505	DC2
OBS_BC_205018	V2LHS_60458	5.67	21.24	58505	DC2
OBS_BC_205021	V2LHS_67400	98.52	94.91	9555	H2AFY
OBS_BC_205021	V2LHS_67400	95.7	92.01	9555	H2AFY
OBS_BC_205023	V2LHS_19249	67.88	60.78	25822	DNAJB5
OBS_BC_205045	V2LHS_57228	43.09	40.12	283450	C12orf51
OBS_BC_205045	V2LHS_57228	22.9	26.16	283450	C12orf51
OBS_BC_205068	V2LHS_114535	48.98	5.07	26157	GIMAP2
OBS_BC_205068	V2LHS_114535	43.04	4.87	26157	GIMAP2
OBS_BC_205076	V2LHS_225406	53.29	85.25	2531	KDSR
OBS_BC_205076	V2LHS_225406	41.36	80.94	2531	KDSR
OBS_BC_205084	V2LHS_271686	23.27	26.74	2796	GNRH1
OBS_BC_205089	V2LHS_140520	15.99	59.23	5986	RFNG
OBS_BC_205089	V2LHS_140520	11.65	43.21	5986	RFNG
OBS_BC_205102	V2LHS_130230	19.01	85.93	10555	AGPAT2
OBS_BC_205102	V2LHS_130230	15.61	81.22	10555	AGPAT2
OBS_BC_205127	V2LHS_200124	61.77	76.67	29101	SSU72
OBS_BC_205127	V2LHS_200124	21.84	64.9	29101	SSU72
OBS_BC_205140	V2LHS_157038	79.59	51.85	348995	NUP43
OBS_BC_205140	V2LHS_157038	71.84	44.06	348995	NUP43
OBS_BC_205141	V2LHS_59084	59.52	81.8	170591	S100Z
OBS_BC_205141	V2LHS_59084	55.19	77.39	170591	S100Z
OBS_BC_205143	V2LHS_133919	63.06	37.19	3933	LCN1
OBS_BC_205143	V2LHS_133919	60.67	29.91	3933	LCN1
OBS_BC_205168	V2LHS_37867	73.17	8.11	134864	TAAR1
OBS_BC_205168	V2LHS_37867	38.65	7.53	134864	TAAR1
OBS_BC_205218	V2LHS_21108	68.68	32.64	26229	B3GAT3
OBS_BC_205226	V2LHS_116441	5.08	7.82	79085	SLC25A23
OBS_BC_205226	V2LHS_116441	2.71	4.02	79085	SLC25A23
OBS_BC_205245	V2LHS_70477	68.06	81.87	10327	AKR1A1
OBS_BC_205245	V2LHS_70477	67.19	77.01	10327	AKR1A1
OBS_BC_205256	V2LHS_241709	92.02	50.81	8496	PPFIBP1
OBS_BC_205256	V2LHS_241709	91.72	46.4	8496	PPFIBP1
OBS_BC_205260	V2LHS_239056	34.63	64.05	2176	FANCC
OBS_BC_205281	V2LHS_47264	74.98	4.08	130888	FBXO36
OBS_BC_205281	V2LHS_47264	58.33	2.36	130888	FBXO36
OBS_BC_205310	V2LHS_229829	4.95	2.41	2243	FGA
OBS_BC_205310	V2LHS_229829	3.83	1.49	2243	FGA
OBS_BC_205334	V2LHS_21813	91.99	91.85	221656	AOF1
OBS_BC_205334	V2LHS_21813	86.65	84.97	221656	AOF1
OBS_BC_205347	V2LHS_23184	92.85	63.19	8727	CTNNAL1
OBS_BC_205347	V2LHS_23184	90	62.08	8727	CTNNAL1
OBS_BC_205352	V2LHS_24660	55.84	26.31	22802	CLCA4
OBS_BC_205352	V2LHS_24660	20.52	19.63	22802	CLCA4
OBS_BC_205372	V2LHS_114878	80.93	19.77	51046	ST8SIA3
OBS_BC_205372	V2LHS_114878	76.85	12.34	51046	ST8SIA3
OBS_BC_205387	V2LHS_16841	99.85	87	8788	DLK1
OBS_BC_205387	V2LHS_16841	99.77	64.83	8788	DLK1
OBS_BC_205391	V2LHS_29344	42.42	63.59	252969	NEIL2
OBS_BC_205391	V2LHS_29344	41.52	54.01	252969	NEIL2
OBS_BC_205401	V2LHS_228470	66.93	91.84	835	CASP2
OBS_BC_205401	V2LHS_228470	63.53	80.58	835	CASP2
OBS_BC_205407	V2LHS_206752	27	64.37	197021	LCTL
OBS_BC_205421	V2LHS_197468	42.8	88.51	10529	NEBL
OBS_BC_205421	V2LHS_197468	37.21	86	10529	NEBL
OBS_BC_205433	V2LHS_166446	72.98	90.77	340441	A26A1
OBS_BC_205433	V2LHS_166446	65.3	90.48	340441	A26A1
OBS_BC_205456	V2LHS_63860	89.41	78.27	440279	UNC13C
OBS_BC_205456	V2LHS_63860	70.3	72	440279	UNC13C
OBS_BC_205486	V2LHS_62105	55.97	26.28	1653	DDX1
OBS_BC_205486	V2LHS_62105	55.82	26.15	1653	DDX1
OBS_BC_205491	V2LHS_137822	36.5	45.65	81792	ADAMTS12
OBS_BC_205491	V2LHS_137822	33.19	30.24	81792	ADAMTS12
OBS_BC_205539	V2LHS_59828	26.52	88.37	25972	UNC50
OBS_BC_205539	V2LHS_59828	25.93	50.78	25972	UNC50
OBS_BC_205559	V2LHS_87159	99.55	99.26	5015	OTX2
OBS_BC_205559	V2LHS_87159	98.44	99.01	5015	OTX2
OBS_BC_205576	V2LHS_284634	9.42	55.29	11118	BTN3A2
OBS_BC_205576	V2LHS_284634	5.92	54.96	11118	BTN3A2
OBS_BC_205584	V2LHS_200290	59.21	58.25	8708	B3GALT1
OBS_BC_205586	V2LHS_189136	92.37	69.71	1788	DNMT3A
OBS_BC_205586	V2LHS_189136	84.4	49.8	1788	DNMT3A
OBS_BC_205601	V2LHS_134712	81.98	70.73	51092	SIDT2
OBS_BC_205609	V2LHS_87103	90.25	87.88	4848	CNOT2
OBS_BC_205609	V2LHS_87103	74.26	82.91	4848	CNOT2
OBS_BC_205617	V2LHS_255587	3.11	5.86	2200	FBN1
OBS_BC_205617	V2LHS_255587	1.22	2.31	2200	FBN1
OBS_BC_205632	V2LHS_31237	26.35	44.24	6362	CCL18
OBS_BC_205632	V2LHS_31237	24.58	39.01	6362	CCL18
OBS_BC_205633	V2LHS_89240	44.09	35.8	675	BRCA2
OBS_BC_205633	V2LHS_89240	37.29	30.88	675	BRCA2
OBS_BC_205642	V2LHS_117836	52.77	52.59	84062	DTNBP1
OBS_BC_205642	V2LHS_117836	35.55	50.98	84062	DTNBP1
OBS_BC_205668	V2LHS_151103	65.43	73.32	1629	DBT
OBS_BC_205668	V2LHS_151103	57.13	46.62	1629	DBT
OBS_BC_205672	V2LHS_23909	6.53	65.95	8661	EIF3A
OBS_BC_205672	V2LHS_23909	5.46	58.89	8661	EIF3A
OBS_BC_205683	V2LHS_192373	65.14	16.38	341116	MS4A10
OBS_BC_205683	V2LHS_192373	52.75	16	341116	MS4A10
OBS_BC_205694	V2LHS_35548	49.94	18.2	9344	TAOK2
OBS_BC_205694	V2LHS_35548	13.6	10.15	9344	TAOK2
OBS_BC_205706	V2LHS_207458	71.31	62.08	4736, 100128936	RPL10A, LOC100128936
OBS_BC_205742	V2LHS_151093	91.81	5.9	1534	CYB561
OBS_BC_205742	V2LHS_151093	77.7	2.74	1534	CYB561
OBS_BC_205756	V2LHS_150651	62.94	92.2	1212	CLTB
OBS_BC_205756	V2LHS_150651	44.8	80.99	1212	CLTB
OBS_BC_205760	V2LHS_28737	25.28	62.83	197370	NSMCE1
OBS_BC_205760	V2LHS_28737	24.41	61.69	197370	NSMCE1
OBS_BC_205766	V2LHS_197329	56.77	38.79	10783	NEK6
OBS_BC_205766	V2LHS_197329	50.48	26.58	10783	NEK6
OBS_BC_205769	V2LHS_137870	53.34	58.36	81849	ST6GALNAC5
OBS_BC_205769	V2LHS_137870	43.26	50.47	81849	ST6GALNAC5
OBS_BC_205771	V2LHS_52030	9.33	98.04	54187	NANS
OBS_BC_205771	V2LHS_52030	6.46	95.29	54187	NANS
OBS_BC_205773	V2LHS_139653	53.94	75.16	57610	RANBP10
OBS_BC_205773	V2LHS_139653	53.84	63.34	57610	RANBP10
OBS_BC_205784	V2LHS_137916	92.49	95.64	81875	ISG20L2
OBS_BC_205784	V2LHS_137916	88	92.21	81875	ISG20L2
OBS_BC_205785	V2LHS_171404	76.43	59.13	7112	TMPO
OBS_BC_205785	V2LHS_171404	68.35	29.88	7112	TMPO
OBS_BC_205788	V2LHS_153443	99.39	44.38	6709	SPTAN1
OBS_BC_205788	V2LHS_153443	96.49	43.41	6709	SPTAN1
OBS_BC_205793	V2LHS_188943	18.81	12.11	843	CASP10
OBS_BC_205793	V2LHS_188943	17.2	9	843	CASP10
OBS_BC_205797	V2LHS_247743	11.94	35.98	57761	TRIB3
OBS_BC_205802	V2LHS_133746	48.44	87.43	3822, 3823	KLRC2, KLRC3
OBS_BC_205802	V2LHS_133746	30.47	84.73	3822, 3823	KLRC2, KLRC3
OBS_BC_205805	V2LHS_269397	39.38	55.2	51686	OAZ3
OBS_BC_205805	V2LHS_269397	32.81	37.28	51686	OAZ3
OBS_BC_205808	V2LHS_194781	18.4	31.12	1231, 729230	CCR2, FLJ78302
OBS_BC_205808	V2LHS_194781	14.53	23.9	1231, 729230	CCR2, FLJ78302
OBS_BC_205811	V2LHS_98262	71.53	55.92	64748	LPPR2
OBS_BC_205811	V2LHS_98262	53.62	41.41	64748	LPPR2
OBS_BC_205813	V2LHS_151245	84.97	93.12	1828	DSG1
OBS_BC_205818	V2LHS_202682	35.37	43.61	26263	FBXO22
OBS_BC_205818	V2LHS_202682	16.73	24.77	26263	FBXO22
OBS_BC_205821	V2LHS_273937	6	19.92	57611	ISLR2
OBS_BC_205821	V2LHS_273937	5.76	17.94	57611	ISLR2
OBS_BC_205822	V2LHS_151753	80.11	91.78	4249	MGAT5
OBS_BC_205822	V2LHS_151753	47.75	71.38	4249	MGAT5
OBS_BC_205825	V2LHS_155779	99.09	86.43	55151	TMEM38B
OBS_BC_205825	V2LHS_155779	91.68	70.26	55151	TMEM38B
OBS_BC_205826	V2LHS_252766	40.15	68.55	11138	TBC1D8
OBS_BC_205826	V2LHS_252766	33.24	68.28	11138	TBC1D8
OBS_BC_205828	V2LHS_68113	53.55	35.45	10054	UBA2
OBS_BC_205828	V2LHS_68113	40.66	31.71	10054	UBA2
OBS_BC_205829	V2LHS_24224	32.24	43.24	50652	PCA3
OBS_BC_205829	V2LHS_24224	30.83	27.89	50652	PCA3
OBS_BC_205832	V2LHS_203413	1.6	2.13	24137, 285643	KIF4A, KIF4B
OBS_BC_205838	V2LHS_44273	92.07	72.78	167227	DCP2
OBS_BC_205838	V2LHS_44273	82.71	50.85	167227	DCP2
OBS_BC_205840	V2LHS_93005	73.48	66.87	4688	NCF2
OBS_BC_205840	V2LHS_93005	69.13	59.69	4688	NCF2
OBS_BC_205843	V2LHS_114178	33.04	49.97	2781	GNAZ
OBS_BC_205846	V2LHS_68372	41.99	97.24	10038	PARP2
OBS_BC_205848	V2LHS_112556	97.19	96.82	1812	DRD1
OBS_BC_205848	V2LHS_112556	95.64	67.37	1812	DRD1
OBS_BC_205849	V2LHS_98551	76.45	96.16	64805	P2RY12
OBS_BC_205849	V2LHS_98551	73.23	95.84	64805	P2RY12
OBS_BC_205852	V2LHS_130830	56.02	31.03	2897	GRIK1
OBS_BC_205852	V2LHS_130830	52.07	25.34	2897	GRIK1
OBS_BC_205853	V2LHS_202152	47.24	56.85	50618	ITSN2
OBS_BC_205853	V2LHS_202152	42.21	26.03	50618	ITSN2
OBS_BC_205854	V2LHS_160013	72.23	56.8	3373	HYAL1
OBS_BC_205854	V2LHS_160013	64.86	36.54	3373	HYAL1
OBS_BC_205856	V2LHS_117642	85.23	79.17	83939	EIF2A
OBS_BC_205856	V2LHS_117642	72.69	67.55	83939	EIF2A
OBS_BC_205857	V2LHS_172057	45.41	52.08	7514	XPO1
OBS_BC_205857	V2LHS_172057	43.99	49	7514	XPO1
OBS_BC_205858	V2LHS_98849	16.2	70.64	81839	VANGL1
OBS_BC_205858	V2LHS_98849	13.76	49.83	81839	VANGL1
OBS_BC_205860	V2LHS_82736	60.77	32.52	2934	GSN
OBS_BC_205860	V2LHS_82736	45.65	31.23	2934	GSN
OBS_BC_205862	V2LHS_262302	86.63	60.92	50650	ARHGEF3
OBS_BC_205862	V2LHS_262302	75.2	44.47	50650	ARHGEF3
OBS_BC_205864	V2LHS_277618	95.57	92.28	5553	PRG2
OBS_BC_205869	V2LHS_226965	87.55	7.74	1967	EIF2B1
OBS_BC_205869	V2LHS_226965	86.31	4.04	1967	EIF2B1
OBS_BC_205871	V2LHS_171148	34.19	56.91	5870	RAB6A
OBS_BC_205871	V2LHS_171148	26.76	53.44	5870	RAB6A
OBS_BC_205880	V2LHS_111947	95.75	97.66	134	ADORA1
OBS_BC_205880	V2LHS_111947	94.48	95.69	134	ADORA1
OBS_BC_205882	V2LHS_152649	94.89	63.29	5069	PAPPA
OBS_BC_205882	V2LHS_152649	79.6	22.39	5069	PAPPA
OBS_BC_205883	V2LHS_245801	94.58	69.75	124460	SNX20
OBS_BC_205883	V2LHS_245801	93.35	69.49	124460	SNX20
OBS_BC_205884	V2LHS_236039	94.14	27.84	2327	FMO2
OBS_BC_205884	V2LHS_236039	90.82	19.01	2327	FMO2
OBS_BC_205886	V2LHS_261083	4.31	11.33	-	-
OBS_BC_205886	V2LHS_261083	3.91	7.42	-	-
OBS_BC_205890	V2LHS_221982	15.74	14.46	7328	UBE2H
OBS_BC_205890	V2LHS_221982	11.27	11.25	7328	UBE2H
OBS_BC_205894	V2LHS_138701	51.29	16.46	84313	VPS25
OBS_BC_205894	V2LHS_138701	44.51	15.26	84313	VPS25
OBS_BC_205901	V2LHS_228420	34.47	42.9	770	CA11
OBS_BC_205901	V2LHS_228420	31.6	35	770	CA11
OBS_BC_205903	V2LHS_285184	39.66	84.5	4622	MYH4
OBS_BC_205904	V2LHS_99040	40.82	90.15	80762	NDFIP1
OBS_BC_205904	V2LHS_99040	35.83	62.01	80762	NDFIP1
OBS_BC_205914	V2LHS_118066	48.12	55.87	84135	UTP15
OBS_BC_205923	V2LHS_133322	27.89	40.08	3575	IL7R
OBS_BC_205923	V2LHS_133322	25.02	21.07	3575	IL7R
OBS_BC_205934	V2LHS_213016	87.56	13.98	-	-
OBS_BC_205934	V2LHS_213016	72.33	10.01	-	-
OBS_BC_205937	V2LHS_260245	53.46	38.78	11021	RAB35
OBS_BC_205937	V2LHS_260245	29.44	27.31	11021	RAB35
OBS_BC_205938	V2LHS_94233	95.04	73.39	55	ACPP
OBS_BC_205938	V2LHS_94233	88.23	64.52	55	ACPP
OBS_BC_205942	V2LHS_192755	99.69	98.99	498	ATP5A1
OBS_BC_205942	V2LHS_192755	99.21	84.43	498	ATP5A1
OBS_BC_205944	V2LHS_132900	40.39	53.66	570	BAAT
OBS_BC_205944	V2LHS_132900	30.96	38.24	570	BAAT
OBS_BC_205945	V2LHS_132847	76.65	44.89	525	ATP6V1B1
OBS_BC_205945	V2LHS_132847	30.33	41.79	525	ATP6V1B1
OBS_BC_205947	V2LHS_261590	82.02	95.37	60467	BPESC1
OBS_BC_205947	V2LHS_261590	79.13	93.5	60467	BPESC1
OBS_BC_205952	V2LHS_24251	92.77	9.97	1387	CREBBP
OBS_BC_205952	V2LHS_24251	70.91	9.16	1387	CREBBP
OBS_BC_205954	V2LHS_40899	71.17	66.09	9129	PRPF3
OBS_BC_205954	V2LHS_40899	59.89	54.35	9129	PRPF3
OBS_BC_205956	V2LHS_34521	21.65	96.42	28234	SLCO1B3
OBS_BC_205956	V2LHS_34521	20.97	87.12	28234	SLCO1B3
OBS_BC_205959	V2LHS_227618	62.22	43.6	51582	AZIN1
OBS_BC_205959	V2LHS_227618	58.76	27.38	51582	AZIN1
OBS_BC_205963	V2LHS_130608	48.65	58.11	5925	RB1
OBS_BC_205963	V2LHS_130608	31.92	40.97	5925	RB1
OBS_BC_205966	V2LHS_27490	78.32	96.7	11001	SLC27A2
OBS_BC_205966	V2LHS_27490	55.57	86.42	11001	SLC27A2
OBS_BC_205967	V2LHS_114004	61.56	18.92	2549	GAB1
OBS_BC_205971	V2LHS_131449	42.36	14.25	5617	PRL
OBS_BC_205971	V2LHS_131449	30.34	9.93	5617	PRL
OBS_BC_205972	V2LHS_103908	69.52	94.23	339501	MPN2
OBS_BC_205972	V2LHS_103908	61.03	58.26	339501	MPN2
OBS_BC_205977	V2LHS_15119	37.26	19.71	734	OSGIN2
OBS_BC_205977	V2LHS_15119	33.7	15.2	734	OSGIN2
OBS_BC_205978	V2LHS_243454	93.3	75.79	9313	MMP20
OBS_BC_205978	V2LHS_243454	93.29	73.6	9313	MMP20
OBS_BC_205980	V2LHS_193912	11.11	98.05	391622, 391627, 402164, 728369, 728373, 728379, 728386, 728393, 728400, 728405, 728419	DUB4, USP17, LOC402164, LOC728369, LOC728373, LOC728379, LOC728386, LOC728393, LOC728400, LOC728405, LOC728419
OBS_BC_205980	V2LHS_193912	7.34	93.64	391622, 391627, 402164, 728369, 728373, 728379, 728386, 728393, 728400, 728405, 728419	DUB4, USP17, LOC402164, LOC728369, LOC728373, LOC728379, LOC728386, LOC728393, LOC728400, LOC728405, LOC728419
OBS_BC_205982	V2LHS_17769	98.07	78.55	9242	MSC
OBS_BC_205982	V2LHS_17769	79.79	42.67	9242	MSC
OBS_BC_205984	V2LHS_198853	94.91	67.83	10735	STAG2
OBS_BC_205986	V2LHS_131380	68	36.46	5406	PNLIP
OBS_BC_205989	V2LHS_28431	59.92	29.47	9246	UBE2L6
OBS_BC_205989	V2LHS_28431	52.38	26.48	9246	UBE2L6
OBS_BC_205991	V2LHS_232378	65.25	84.09	64710	NUCKS1
OBS_BC_205991	V2LHS_232378	64.8	76.6	64710	NUCKS1
OBS_BC_205992	V2LHS_262702	62.2	98.8	6929	TCF3
OBS_BC_205992	V2LHS_262702	46.9	95.45	6929	TCF3
OBS_BC_205995	V2LHS_31295	65.74	69.54	6346	CCL1
OBS_BC_205995	V2LHS_31295	43.11	66.76	6346	CCL1
OBS_BC_206000	V2LHS_205345	96.98	93.78	8776	MTMR1
OBS_BC_206000	V2LHS_205345	94.69	92.78	8776	MTMR1
OBS_BC_206004	V2LHS_165018	62.37	15.96	389208	TMPRSS11F
OBS_BC_206004	V2LHS_165018	57.7	15.39	389208	TMPRSS11F
OBS_BC_206008	V2LHS_13708	90.13	60.16	9616	RNF7
OBS_BC_206008	V2LHS_13708	83.6	51.13	9616	RNF7
OBS_BC_206010	V2LHS_47771	20.31	84.94	8896	BUD31
OBS_BC_206010	V2LHS_47771	16.81	71.05	8896	BUD31
OBS_BC_206018	V2LHS_93547	37.63	24.48	5395	PMS2
OBS_BC_206019	V2LHS_224902	92.65	66.04	3598	IL13RA2
OBS_BC_206019	V2LHS_224902	77.54	51.39	3598	IL13RA2
OBS_BC_206021	V2LHS_262592	81.17	71.56	6470	SHMT1
OBS_BC_206021	V2LHS_262592	72.86	60.13	6470	SHMT1
OBS_BC_206035	V2LHS_97822	74.47	67.31	51145	LOC51145
OBS_BC_206041	V2LHS_115544	31.72	61.24	51202	DDX47
OBS_BC_206041	V2LHS_115544	31.03	51.06	51202	DDX47
OBS_BC_206052	V2LHS_188040	17.36	49.24	-	-
OBS_BC_206052	V2LHS_188040	14.84	47.89	-	-
OBS_BC_206056	V2LHS_155433	38.32	90	55697	VAC14
OBS_BC_206056	V2LHS_155433	29.29	78.34	55697	VAC14
OBS_BC_206057	V2LHS_133342	61.44	81.56	3596	IL13
OBS_BC_206057	V2LHS_133342	43.27	81.4	3596	IL13
OBS_BC_206059	V2LHS_172392	60.06	55.55	7852	CXCR4
OBS_BC_206063	V2LHS_66502	55.74	79.49	11168	PSIP1
OBS_BC_206063	V2LHS_66502	40.67	76.2	11168	PSIP1
OBS_BC_206068	V2LHS_56727	59.89	91.76	6789	STK4
OBS_BC_206069	V2LHS_201259	93.61	75.89	94239	H2AFV
OBS_BC_206069	V2LHS_201259	93.45	72.55	94239	H2AFV
OBS_BC_206070	V2LHS_74453	8.57	5.73	254910	LCE5A
OBS_BC_206070	V2LHS_74453	5.49	4.93	254910	LCE5A
OBS_BC_206072	V2LHS_227854	91.22	78.99	2617	GARS
OBS_BC_206072	V2LHS_227854	78.08	58.92	2617	GARS
OBS_BC_206077	V2LHS_254102	64.32	91.37	5067	CNTN3
OBS_BC_206078	V2LHS_239479	2.19	6.65	5241	PGR
OBS_BC_206081	V2LHS_63090	45.97	93.47	222659	PXT1
OBS_BC_206081	V2LHS_63090	35.92	58.68	222659	PXT1
OBS_BC_206085	V2LHS_113732	63.08	91.95	2020	EN2
OBS_BC_206085	V2LHS_113732	54.98	88.19	2020	EN2
OBS_BC_206088	V2LHS_65509	36.37	33.93	10413	YAP1
OBS_BC_206088	V2LHS_65509	27.84	27.78	10413	YAP1
OBS_BC_206089	V2LHS_262810	5.65	49.31	10463	SLC30A9
OBS_BC_206090	V2LHS_51771	23.02	37.09	56913	C1GALT1
OBS_BC_206093	V2LHS_206753	59.66	55.97	23015, 283768, 390535, 440270, 440321, 729266, 729786, 100132565, 100132979	GOLGA8A, GOLGA8G, GOLGA8E, GOLGA8B, FLJ32679, LOC729266, LOC729786, LOC100132565, LOC100132979
OBS_BC_206094	V2LHS_93027	36.9	17.82	5019	OXCT1
OBS_BC_206094	V2LHS_93027	31.44	7.05	5019	OXCT1
OBS_BC_206103	V2LHS_83531	80.23	51.78	2235	FECH
OBS_BC_206105	V2LHS_84048	86.59	81.46	1806	DPYD
OBS_BC_206105	V2LHS_84048	82.06	60.82	1806	DPYD
OBS_BC_206110	V2LHS_223970	36.23	52.33	125	ADH1B
OBS_BC_206110	V2LHS_223970	35.23	33.15	125	ADH1B
OBS_BC_206111	V2LHS_16882	17.61	63.09	5723, 8781, 100133481	PSPH, PSPHL, LOC100133481
OBS_BC_206111	V2LHS_16882	12.94	62.91	5723, 8781, 100133481	PSPH, PSPHL, LOC100133481
OBS_BC_206116	V2LHS_93318	13.59	6.34	1308	COL17A1
OBS_BC_206117	V2LHS_151375	63.33	28.94	1977	EIF4E
OBS_BC_206119	V2LHS_115061	45.72	63.35	51168	MYO15A
OBS_BC_206119	V2LHS_115061	28.49	63.22	51168	MYO15A
OBS_BC_206124	V2LHS_118394	35.66	62.81	113540	CMTM1
OBS_BC_206128	V2LHS_178152	5.52	43.9	84992	PIGY
OBS_BC_206128	V2LHS_178152	4.18	43.62	84992	PIGY
OBS_BC_206132	V2LHS_116394	65.83	96.57	79075	DSCC1
OBS_BC_206132	V2LHS_116394	48.74	95.1	79075	DSCC1
OBS_BC_206137	V2LHS_72184	23.35	53.32	6546	SLC8A1
OBS_BC_206137	V2LHS_72184	20.3	42.28	6546	SLC8A1
OBS_BC_206138	V2LHS_115241	76.21	89.72	1007	CDH9
OBS_BC_206148	V2LHS_24947	25.74	95.82	9994	CASP8AP2
OBS_BC_206148	V2LHS_24947	23.29	81.39	9994	CASP8AP2
OBS_BC_206149	V2LHS_31486	97.81	99.2	6342	SCP2
OBS_BC_206151	V2LHS_69167	53.38	62.14	57504	MTA3
OBS_BC_206151	V2LHS_69167	20.5	54.82	57504	MTA3
OBS_BC_206152	V2LHS_97709	42.73	98.11	22820	COPG
OBS_BC_206152	V2LHS_97709	31.86	97.89	22820	COPG
OBS_BC_206153	V2LHS_92645	98.36	86.49	7299	TYR
OBS_BC_206157	V2LHS_64365	38.34	42.69	19	ABCA1
OBS_BC_206157	V2LHS_64365	24.07	34.88	19	ABCA1
OBS_BC_206161	V2LHS_37196	81.58	63.38	4089	SMAD4
OBS_BC_206161	V2LHS_37196	60.77	56.98	4089	SMAD4
OBS_BC_206164	V2LHS_198101	88.09	54.38	11224	RPL35
OBS_BC_206164	V2LHS_198101	17.97	37.97	11224	RPL35
OBS_BC_206166	V2LHS_220312	13.94	46.08	7385	UQCRC2
OBS_BC_206170	V2LHS_136011	89.72	64.21	9489	PGS1
OBS_BC_206170	V2LHS_136011	85.94	50.58	9489	PGS1
OBS_BC_206171	V2LHS_112871	83.37	9.97	988	CDC5L
OBS_BC_206174	V2LHS_199882	87.25	37.01	29100	TMEM208
OBS_BC_206174	V2LHS_199882	79.27	29.48	29100	TMEM208
OBS_BC_206177	V2LHS_256957	98.31	90.44	1836	SLC26A2
OBS_BC_206186	V2LHS_240262	66.46	63.88	8353	HIST1H3E
OBS_BC_206186	V2LHS_240262	51.36	60.7	8353	HIST1H3E
OBS_BC_206196	V2LHS_220661	73.54	90.37	79971	GPR177
OBS_BC_206196	V2LHS_220661	65.64	89.58	79971	GPR177
OBS_BC_206199	V2LHS_271400	58.34	34.1	80219	COQ10B
OBS_BC_206199	V2LHS_271400	33.23	29.61	80219	COQ10B
OBS_BC_206201	V2LHS_133232	46.58	71.75	3371	TNC
OBS_BC_206201	V2LHS_133232	38.49	47.28	3371	TNC
OBS_BC_206203	V2LHS_76757	83.48	93.96	6443	SGCB
OBS_BC_206203	V2LHS_76757	75.53	63.04	6443	SGCB
OBS_BC_206212	V2LHS_197077	57.18	80.21	10438	C1D
OBS_BC_206214	V2LHS_112697	35.97	76.07	817	CAMK2D
OBS_BC_206214	V2LHS_112697	30.71	64.23	817	CAMK2D
OBS_BC_206215	V2LHS_217260	36.24	69.09	-	-
OBS_BC_206215	V2LHS_217260	32.5	67.52	-	-
OBS_BC_206218	V2LHS_139377	56.9	82.54	100130100	LOC100130100
OBS_BC_206218	V2LHS_139377	28.91	58.58	100130100	LOC100130100
OBS_BC_206220	V2LHS_222188	69.74	95.63	84938	ATG4C
OBS_BC_206220	V2LHS_222188	48.2	90.68	84938	ATG4C
OBS_BC_206222	V2LHS_67107	49.01	48.34	7114, 7115, 7117	TMSB4X, TMSL1, TMSL3
OBS_BC_206228	V2LHS_251052	89.43	89.06	3705	ITPK1
OBS_BC_206228	V2LHS_251052	81.32	57.36	3705	ITPK1
OBS_BC_206233	V2LHS_24165	37.2	29.37	1463	NCAN
OBS_BC_206233	V2LHS_24165	12.43	15.32	1463	NCAN
OBS_BC_206234	V2LHS_177214	22.6	6.81	4097, 644132	MAFG, LOC644132
OBS_BC_206234	V2LHS_177214	22.56	5.8	4097, 644132	MAFG, LOC644132
OBS_BC_206235	V2LHS_138366	56.43	75.43	84255	SLC37A3
OBS_BC_206235	V2LHS_138366	47.27	49.61	84255	SLC37A3
OBS_BC_206236	V2LHS_267812	57.76	53.82	80830	APOL6
OBS_BC_206236	V2LHS_267812	46.04	43.39	80830	APOL6
OBS_BC_206238	V2LHS_225595	54.82	88.45	1579, 284541	CYP4A11, CYP4A22
OBS_BC_206238	V2LHS_225595	44.83	80.26	1579, 284541	CYP4A11, CYP4A22
OBS_BC_206239	V2LHS_173507	0.95	96.13	114881	OSBPL7
OBS_BC_206239	V2LHS_173507	0.31	92.79	114881	OSBPL7
OBS_BC_206242	V2LHS_55342	57.75	64.3	54108	CHRAC1
OBS_BC_206242	V2LHS_55342	57.32	48.85	54108	CHRAC1
OBS_BC_206247	V2LHS_16398	80.2	56.56	26958	COPG2
OBS_BC_206247	V2LHS_16398	48.24	48.35	26958	COPG2
OBS_BC_206256	V2LHS_151637	88.84	49.91	4179	CD46
OBS_BC_206258	V2LHS_196223	18.49	15.78	8887	TAX1BP1
OBS_BC_206258	V2LHS_196223	16.16	11.38	8887	TAX1BP1
OBS_BC_206267	V2LHS_215903	27.21	33.63	11172	INSL6
OBS_BC_206267	V2LHS_215903	22.99	30.62	11172	INSL6
OBS_BC_206269	V2LHS_35618	25.45	26.3	90957	DHX57
OBS_BC_206277	V2LHS_202735	68.32	95.12	23049	SMG1
OBS_BC_206277	V2LHS_202735	66.48	86.09	23049	SMG1
OBS_BC_206282	V2LHS_64328	79.7	31.46	586	BCAT1
OBS_BC_206282	V2LHS_64328	77.89	25.82	586	BCAT1
OBS_BC_206283	V2LHS_18389	60.41	60.3	9771	RAPGEF5
OBS_BC_206283	V2LHS_18389	53.17	42.36	9771	RAPGEF5
OBS_BC_206284	V2LHS_203173	84.53	52.25	1496	CTNNA2
OBS_BC_206284	V2LHS_203173	76.58	33.47	1496	CTNNA2
OBS_BC_206285	V2LHS_212843	42.43	98.89	-	-
OBS_BC_206285	V2LHS_212843	38.22	97.99	-	-
OBS_BC_206286	V2LHS_18799	79.18	91.43	1746	DLX2
OBS_BC_206289	V2LHS_136283	67.15	87.56	79598	CEP97
OBS_BC_206289	V2LHS_136283	66.11	83.42	79598	CEP97
OBS_BC_206290	V2LHS_120255	31.97	32.94	3681, 3687	ITGAD, ITGAX
OBS_BC_206290	V2LHS_120255	29.92	15.25	3681, 3687	ITGAD, ITGAX
OBS_BC_206294	V2LHS_56960	56.17	38.41	6271, 57623	S100A1, ZFAT
OBS_BC_206294	V2LHS_56960	54.05	23.54	6271, 57623	S100A1, ZFAT
OBS_BC_206297	V2LHS_134848	94.43	82.49	-	-
OBS_BC_206297	V2LHS_134848	71.65	65.05	-	-
OBS_BC_206299	V2LHS_113660	78.45	74.17	1968	EIF2S3
OBS_BC_206299	V2LHS_113660	66.4	69.32	1968	EIF2S3
OBS_BC_206303	V2LHS_79926	71.68	33.85	9646	CTR9
OBS_BC_206303	V2LHS_79926	70.06	19.94	9646	CTR9
OBS_BC_206306	V2LHS_188403	78.1	84.7	4495	MT1G
OBS_BC_206306	V2LHS_188403	55.6	71.31	4495	MT1G
OBS_BC_206314	V2LHS_133990	32.44	57.57	3981	LIG4
OBS_BC_206314	V2LHS_133990	23.43	31.81	3981	LIG4
OBS_BC_206316	V2LHS_131842	25.21	99.55	2543, 2574, 26749, 645037, 729408, 729447	GAGE1, GAGE2A, GAGE8, GAGE2B, CTD-2248C21.2, LOC729447
OBS_BC_206316	V2LHS_131842	20.63	96.47	2543, 2574, 26749, 645037, 729408, 729447	GAGE1, GAGE2A, GAGE8, GAGE2B, CTD-2248C21.2, LOC729447
OBS_BC_206317	V2LHS_226652	51.25	70.7	885	CCK
OBS_BC_206317	V2LHS_226652	38.96	59.04	885	CCK
OBS_BC_206318	V2LHS_131121	33.41	12.2	3615	IMPDH2
OBS_BC_206318	V2LHS_131121	30.12	9.47	3615	IMPDH2
OBS_BC_206319	V2LHS_113386	21.49	82.71	1615	DARS
OBS_BC_206319	V2LHS_113386	16.9	54.06	1615	DARS
OBS_BC_206328	V2LHS_171279	60.81	80.67	5931	RBBP7
OBS_BC_206328	V2LHS_171279	50.49	72.38	5931	RBBP7
OBS_BC_206329	V2LHS_181929	96.56	85.69	431705	ASTL
OBS_BC_206335	V2LHS_239103	88.03	67.27	23268	DNMBP
OBS_BC_206335	V2LHS_239103	67.1	64.03	23268	DNMBP
OBS_BC_206337	V2LHS_90760	16.79	90.78	10817	FRS3
OBS_BC_206337	V2LHS_90760	16.07	73.45	10817	FRS3
OBS_BC_206342	V2LHS_188692	55.4	62.11	6080, 6081, 26768	SNORA73A, SNORA73B, RNU105A
OBS_BC_206342	V2LHS_188692	49.84	44.43	6080, 6081, 26768	SNORA73A, SNORA73B, RNU105A
OBS_BC_206345	V2LHS_92770	79.83	88.5	1290	COL5A2
OBS_BC_206345	V2LHS_92770	74.14	84.07	1290	COL5A2
OBS_BC_206351	V2LHS_93880	11.99	62.27	6240	RRM1
OBS_BC_206351	V2LHS_93880	10.19	52.39	6240	RRM1
OBS_BC_206352	V2LHS_188284	69.79	67.06	11039, 153561, 349035, 375513, 387036, 653080, 653188, 728411, 730393, 100049076, 100132134, 100133831	SMA4, GUSBP1, MGC22265, GUSBL2, GUSBL1, LOC653080, LOC653188, LOC728411, LOC730393, LOC100049076, LOC100132134, LOC100133831
OBS_BC_206352	V2LHS_188284	63.62	60.99	11039, 153561, 349035, 375513, 387036, 653080, 653188, 728411, 730393, 100049076, 100132134, 100133831	SMA4, GUSBP1, MGC22265, GUSBL2, GUSBL1, LOC653080, LOC653188, LOC728411, LOC730393, LOC100049076, LOC100132134, LOC100133831
OBS_BC_206354	V2LHS_151786	52.35	61.35	4288	MKI67
OBS_BC_206354	V2LHS_151786	44.79	47.15	4288	MKI67
OBS_BC_206359	V2LHS_112806	77.12	73.82	939	CD27
OBS_BC_206360	V2LHS_65804	60.7	90.03	7179	TPTE
OBS_BC_206360	V2LHS_65804	60.35	87.69	7179	TPTE
OBS_BC_206364	V2LHS_17357	12.71	39.88	2193	FARSA
OBS_BC_206369	V2LHS_23248	30.03	71.41	8720	MBTPS1
OBS_BC_206377	V2LHS_16657	77.09	62.71	8804	CREG1
OBS_BC_206377	V2LHS_16657	55.13	22.8	8804	CREG1
OBS_BC_206381	V2LHS_150804	19.73	69.86	1329	COX5B
OBS_BC_206381	V2LHS_150804	13.67	46.32	1329	COX5B
OBS_BC_206384	V2LHS_72135	43.87	80.12	7386, 100128525	UQCRFS1, LOC100128525
OBS_BC_206384	V2LHS_72135	36.35	66.62	7386, 100128525	UQCRFS1, LOC100128525
OBS_BC_206386	V2LHS_212281	40.52	78.28	10559, 154313	SLC35A1, C6orf165
OBS_BC_206388	V2LHS_157011	32	46.1	79695	GALNT12
OBS_BC_206388	V2LHS_157011	31	40.28	79695	GALNT12
OBS_BC_206389	V2LHS_75005	4.27	8.27	117159	DCD
OBS_BC_206389	V2LHS_75005	3.7	2.17	117159	DCD
OBS_BC_206392	V2LHS_84736	59.3	60.33	127829	ARL8A
OBS_BC_206392	V2LHS_84736	54.54	54.66	127829	ARL8A
OBS_BC_206394	V2LHS_113992	45.83	47.71	2532	DARC
OBS_BC_206395	V2LHS_59755	40.76	23.74	856	CATR1
OBS_BC_206395	V2LHS_59755	35.04	23.67	856	CATR1
OBS_BC_206397	V2LHS_173029	41.29	28.54	2230	FDX1
OBS_BC_206397	V2LHS_173029	22.51	27.37	2230	FDX1
OBS_BC_206398	V2LHS_198810	70	73.55	27095	TRAPPC3
OBS_BC_206398	V2LHS_198810	66.82	66.59	27095	TRAPPC3
OBS_BC_206400	V2LHS_207264	4.32	58.33	10148	EBI3
OBS_BC_206400	V2LHS_207264	4.21	55.96	10148	EBI3
OBS_BC_206404	V2LHS_114975	62.83	47.94	51164	DCTN4
OBS_BC_206404	V2LHS_114975	61.94	41.11	51164	DCTN4
OBS_BC_206406	V2LHS_161466	3.11	15.81	114793	FMNL2
OBS_BC_206406	V2LHS_161466	2.32	13.07	114793	FMNL2
OBS_BC_206414	V2LHS_63603	50.09	83.24	10587	TXNRD2
OBS_BC_206414	V2LHS_63603	41.41	51.07	10587	TXNRD2
OBS_BC_206418	V2LHS_43611	9.45	36.08	1729	DIAPH1
OBS_BC_206418	V2LHS_43611	9.08	32.67	1729	DIAPH1
OBS_BC_206424	V2LHS_80934	27.75	10.54	64400, 100130746	AKTIP, LOC100130746
OBS_BC_206424	V2LHS_80934	24.39	10.19	64400, 100130746	AKTIP, LOC100130746
OBS_BC_206425	V2LHS_171952	34.81	45.13	7432	VIP
OBS_BC_206427	V2LHS_62437	25.5	58.07	4059	BCAM
OBS_BC_206427	V2LHS_62437	25.05	49.41	4059	BCAM
OBS_BC_206428	V2LHS_94491	33.04	57.39	291	SLC25A4
OBS_BC_206431	V2LHS_179451	84.56	79.4	134860	TAAR9
OBS_BC_206431	V2LHS_179451	78.42	74.64	134860	TAAR9
OBS_BC_206432	V2LHS_172724	95.9	4.27	597	BCL2A1
OBS_BC_206432	V2LHS_172724	89.47	2.28	597	BCL2A1
OBS_BC_206435	V2LHS_206864	99.58	88.83	10585	POMT1
OBS_BC_206435	V2LHS_206864	98.58	88.59	10585	POMT1
OBS_BC_206438	V2LHS_173321	15.2	0.62	6389	SDHA
OBS_BC_206439	V2LHS_59796	74.58	61.3	153222	C5orf41
OBS_BC_206439	V2LHS_59796	64.3	44.69	153222	C5orf41
OBS_BC_206441	V2LHS_76135	85.46	98.35	4653	MYOC
OBS_BC_206444	V2LHS_170459	0.35	1.61	5585	PKN1
OBS_BC_206444	V2LHS_170459	0.29	0.61	5585	PKN1
OBS_BC_206452	V2LHS_111481	25.03	12.5	909	CD1A
OBS_BC_206452	V2LHS_111481	21.44	9.92	909	CD1A
OBS_BC_206456	V2LHS_218765	23.37	92.7	50848	F11R
OBS_BC_206456	V2LHS_218765	18.86	86.53	50848	F11R
OBS_BC_206459	V2LHS_116774	33.1	21.7	81027	TUBB1
OBS_BC_206459	V2LHS_116774	23.58	17.71	81027	TUBB1
OBS_BC_206461	V2LHS_154458	54.69	90.2	55556	ENOSF1
OBS_BC_206461	V2LHS_154458	38.86	73.32	55556	ENOSF1
OBS_BC_206468	V2LHS_59487	10.85	39.56	5866	RAB3IL1
OBS_BC_206468	V2LHS_59487	9.59	18.71	5866	RAB3IL1
OBS_BC_206474	V2LHS_201934	26.4	47.53	5335	PLCG1
OBS_BC_206474	V2LHS_201934	16.84	40.34	5335	PLCG1
OBS_BC_206476	V2LHS_20490	23.03	23.59	4809, 10280	NHP2L1, OPRS1
OBS_BC_206476	V2LHS_20490	14.57	14.32	4809, 10280	NHP2L1, OPRS1
OBS_BC_206478	V2LHS_199014	95.67	87.47	10643	IGF2BP3
OBS_BC_206478	V2LHS_199014	66.72	78.1	10643	IGF2BP3
OBS_BC_206483	V2LHS_197470	27.15	57.51	10577	NPC2
OBS_BC_206483	V2LHS_197470	11.33	46.36	10577	NPC2
OBS_BC_206484	V2LHS_253120	13.29	46.17	-	-
OBS_BC_206484	V2LHS_253120	7.02	33.49	-	-
OBS_BC_206485	V2LHS_261861	27.2	17.08	3744	KCNA10
OBS_BC_206485	V2LHS_261861	24.72	9.69	3744	KCNA10
OBS_BC_206488	V2LHS_95830	13.03	79.42	9933	KIAA0020
OBS_BC_206488	V2LHS_95830	12.98	73.38	9933	KIAA0020
OBS_BC_206489	V2LHS_60135	13.85	41.61	58533	SNX6
OBS_BC_206492	V2LHS_98124	21.55	67.65	11013	TMSL8
OBS_BC_206492	V2LHS_98124	13.26	66.62	11013	TMSL8
OBS_BC_206500	V2LHS_278926	14.56	19.82	643036	UNQ9368
OBS_BC_206504	V2LHS_150723	43.93	69.56	1288	COL4A6
OBS_BC_206504	V2LHS_150723	33.16	59.3	1288	COL4A6
OBS_BC_206512	V2LHS_170187	50.65	68.85	5411	PNN
OBS_BC_206512	V2LHS_170187	34.28	59.2	5411	PNN
OBS_BC_206513	V2LHS_190889	77.99	62.17	-	-
OBS_BC_206513	V2LHS_190889	69.91	48.65	-	-
OBS_BC_206515	V2LHS_53214	61.87	85.89	8833	GMPS
OBS_BC_206515	V2LHS_53214	55.44	66.89	8833	GMPS
OBS_BC_206541	V2LHS_267733	94.03	32.96	117285	DEFB118
OBS_BC_206542	V2LHS_90086	73.04	31.78	10905	MAN1A2
OBS_BC_206542	V2LHS_90086	66.14	23.58	10905	MAN1A2
OBS_BC_206545	V2LHS_209152	87.18	32.13	81832	NETO1
OBS_BC_206545	V2LHS_209152	86.87	30.1	81832	NETO1
OBS_BC_206553	V2LHS_87229	75.18	70.44	27339	PRPF19
OBS_BC_206553	V2LHS_87229	70.15	61.59	27339	PRPF19
OBS_BC_206554	V2LHS_237251	39.59	81.1	79616	CCNJL
OBS_BC_206554	V2LHS_237251	29.04	75.23	79616	CCNJL
OBS_BC_206562	V2LHS_202280	67.38	86.24	4439, 401251	MSH5, C6orf26
OBS_BC_206562	V2LHS_202280	54.91	81.9	4439, 401251	MSH5, C6orf26
OBS_BC_206566	V2LHS_15395	64.73	98.84	152719	LOC152719
OBS_BC_206566	V2LHS_15395	31.39	98.28	152719	LOC152719
OBS_BC_206567	V2LHS_111552	47.16	40.7	3600	IL15
OBS_BC_206567	V2LHS_111552	22.42	21.56	3600	IL15
OBS_BC_206569	V2LHS_16700	17.09	45.93	5522	PPP2R2C
OBS_BC_206569	V2LHS_16700	15.11	45.8	5522	PPP2R2C
OBS_BC_206574	V2LHS_36079	43.77	41.87	160287	LDHAL6A
OBS_BC_206575	V2LHS_157360	25.09	18.98	79758	DHRS12
OBS_BC_206575	V2LHS_157360	17.57	7.63	79758	DHRS12
OBS_BC_206577	V2LHS_41473	48.59	78.43	8314	BAP1
OBS_BC_206577	V2LHS_41473	46.5	52.2	8314	BAP1
OBS_BC_206579	V2LHS_5923	24.87	47.43	9200	PTPLA
OBS_BC_206581	V2LHS_175242	1.41	3.16	55330	CNO
OBS_BC_206581	V2LHS_175242	1.11	2.36	55330	CNO
OBS_BC_206582	V2LHS_24731	29.27	37.29	23580	CDC42EP4
OBS_BC_206583	V2LHS_247228	60.98	40.95	23539	SLC16A8
OBS_BC_206583	V2LHS_247228	32.71	35.7	23539	SLC16A8
OBS_BC_206591	V2LHS_227782	67.5	12.29	84059	GPR98
OBS_BC_206591	V2LHS_227782	67.37	11.1	84059	GPR98
OBS_BC_206592	V2LHS_134371	54.04	68.97	51601	LIPT1
OBS_BC_206593	V2LHS_262011	87.31	94.81	1958	EGR1
OBS_BC_206593	V2LHS_262011	59.63	91.1	1958	EGR1
OBS_BC_206598	V2LHS_258495	29.19	24.88	7832	BTG2
OBS_BC_206599	V2LHS_252444	66.06	59.26	23404	EXOSC2
OBS_BC_206599	V2LHS_252444	54.47	55.73	23404	EXOSC2
OBS_BC_206605	V2LHS_63923	60.1	96.13	29960	FTSJ2
OBS_BC_206605	V2LHS_63923	55.54	87.91	29960	FTSJ2
OBS_BC_206606	V2LHS_95173	46.97	64.59	9787	DLG7
OBS_BC_206606	V2LHS_95173	39.55	62.87	9787	DLG7
OBS_BC_206609	V2LHS_89713	75.7	46.06	270	AMPD1
OBS_BC_206609	V2LHS_89713	62.74	43.28	270	AMPD1
OBS_BC_206613	V2LHS_217583	66.37	78.64	11311	VPS45
OBS_BC_206613	V2LHS_217583	62.35	70.03	11311	VPS45
OBS_BC_206614	V2LHS_150798	98.45	97.25	1327	COX4I1
OBS_BC_206615	V2LHS_41429	1.89	13.61	8653, 100130220	DDX3Y, LOC100130220
OBS_BC_206616	V2LHS_78649	49.09	43.63	9719, 653348	ADAMTSL2, LOC653348
OBS_BC_206616	V2LHS_78649	43.6	27.94	9719, 653348	ADAMTSL2, LOC653348
OBS_BC_206619	V2LHS_237209	30.54	14.06	80124	VCPIP1
OBS_BC_206619	V2LHS_237209	24.92	13.11	80124	VCPIP1
OBS_BC_206620	V2LHS_33815	21.26	45.56	7345	UCHL1
OBS_BC_206620	V2LHS_33815	19.81	42.77	7345	UCHL1
OBS_BC_206623	V2LHS_170340	60.25	56.13	5515	PPP2CA
OBS_BC_206623	V2LHS_170340	37.43	30.59	5515	PPP2CA
OBS_BC_206624	V2LHS_69360	39.2	50.72	8320	EOMES
OBS_BC_206632	V2LHS_58079	81.95	56.35	57403	RAB22A
OBS_BC_206632	V2LHS_58079	45.85	36.07	57403	RAB22A
OBS_BC_206634	V2LHS_98109	84.99	82.46	2564	GABRE
OBS_BC_206634	V2LHS_98109	80.94	78.91	2564	GABRE
OBS_BC_206639	V2LHS_93528	36.69	89.48	5096	PCCB
OBS_BC_206639	V2LHS_93528	36.27	49.4	5096	PCCB
OBS_BC_206640	V2LHS_17531	67.28	15.19	2182	ACSL4
OBS_BC_206640	V2LHS_17531	63.02	13.56	2182	ACSL4
OBS_BC_206644	V2LHS_226171	63.99	63.89	5800	PTPRO
OBS_BC_206644	V2LHS_226171	57.49	57.31	5800	PTPRO
OBS_BC_206648	V2LHS_176079	90.85	25.99	55879	GABRQ
OBS_BC_206652	V2LHS_36760	68.28	93.23	4640	MYO1A
OBS_BC_206652	V2LHS_36760	50.69	89.73	4640	MYO1A
OBS_BC_206653	V2LHS_113218	53.96	77.89	1432	MAPK14
OBS_BC_206653	V2LHS_113218	46.2	71.39	1432	MAPK14
OBS_BC_206655	V2LHS_56643	13.86	43.38	7094	TLN1
OBS_BC_206655	V2LHS_56643	12.7	30.81	7094	TLN1
OBS_BC_206656	V2LHS_96097	53.1	38.05	22865	SLITRK3
OBS_BC_206656	V2LHS_96097	35.88	37.31	22865	SLITRK3
OBS_BC_206659	V2LHS_218261	67.37	32.76	7097	TLR2
OBS_BC_206659	V2LHS_218261	53.59	23.28	7097	TLR2
OBS_BC_206661	V2LHS_159278	41.69	44.16	84647	PLA2G12B
OBS_BC_206661	V2LHS_159278	22.1	21.96	84647	PLA2G12B
OBS_BC_206666	V2LHS_24230	38.31	67.81	8624	PSMG1
OBS_BC_206666	V2LHS_24230	35.79	60.67	8624	PSMG1
OBS_BC_206668	V2LHS_112601	7.38	14.26	658	BMPR1B
OBS_BC_206668	V2LHS_112601	4.82	13.28	658	BMPR1B
OBS_BC_206669	V2LHS_62435	29.33	56.55	4059	BCAM
OBS_BC_206669	V2LHS_62435	22.71	34.71	4059	BCAM
OBS_BC_206670	V2LHS_19968	12.12	23.72	23443	SLC35A3
OBS_BC_206670	V2LHS_19968	8.77	18.02	23443	SLC35A3
OBS_BC_206677	V2LHS_91719	61.3	49.7	27308	RP5-886K2.1
OBS_BC_206677	V2LHS_91719	57.21	38.86	27308	RP5-886K2.1
OBS_BC_206678	V2LHS_153611	88.59	32.8	6792	CDKL5
OBS_BC_206678	V2LHS_153611	71.35	29.41	6792	CDKL5
OBS_BC_206680	V2LHS_67671	16.95	92.66	9528	TMEM59
OBS_BC_206680	V2LHS_67671	14.55	90.02	9528	TMEM59
OBS_BC_206683	V2LHS_137340	58.68	61.24	10221	TRIB1
OBS_BC_206683	V2LHS_137340	48.73	54.88	10221	TRIB1
OBS_BC_206688	V2LHS_250317	34.76	30.56	6990	DYNLT3
OBS_BC_206688	V2LHS_250317	28.08	27.59	6990	DYNLT3
OBS_BC_206692	V2LHS_113553	10.62	34.15	1809	DPYSL3
OBS_BC_206692	V2LHS_113553	10.37	25.15	1809	DPYSL3
OBS_BC_206696	V2LHS_153624	29	73.62	6198	RPS6KB1
OBS_BC_206703	V2LHS_174881	79.28	96.9	55068	ENOX1
OBS_BC_206703	V2LHS_174881	56.01	76.69	55068	ENOX1
OBS_BC_206705	V2LHS_222066	79.64	98.51	80852	GRIP2
OBS_BC_206705	V2LHS_222066	65.52	98.21	80852	GRIP2
OBS_BC_206708	V2LHS_67483	68.73	39.45	9547	CXCL14
OBS_BC_206708	V2LHS_67483	62.64	35.17	9547	CXCL14
OBS_BC_206710	V2LHS_242284	43.45	6.46	8710	SERPINB7
OBS_BC_206712	V2LHS_182593	61.99	35.4	79832	QSER1
OBS_BC_206712	V2LHS_182593	59.81	27.36	79832	QSER1
OBS_BC_206713	V2LHS_201678	34.34	77.64	7442	TRPV1
OBS_BC_206723	V2LHS_18618	41.77	37.63	23527	CENTB2
OBS_BC_206723	V2LHS_18618	40.64	26.54	23527	CENTB2
OBS_BC_206725	V2LHS_68092	18.42	94.57	10051	SMC4
OBS_BC_206725	V2LHS_68092	16.62	75.47	10051	SMC4
OBS_BC_206728	V2LHS_202616	70.22	89.34	51725	FBXO40
OBS_BC_206728	V2LHS_202616	52.85	86.61	51725	FBXO40
OBS_BC_206730	V2LHS_245484	48.81	5.82	152330	CNTN4
OBS_BC_206730	V2LHS_245484	26.53	5.12	152330	CNTN4
OBS_BC_206732	V2LHS_16720	15.41	39.24	8796	SCEL
OBS_BC_206732	V2LHS_16720	14.31	36.24	8796	SCEL
OBS_BC_206737	V2LHS_67328	36.83	86.21	9577	BRE
OBS_BC_206737	V2LHS_67328	33.12	85.52	9577	BRE
OBS_BC_206739	V2LHS_242793	26.94	46.85	4897	NRCAM
OBS_BC_206739	V2LHS_242793	21.52	17.7	4897	NRCAM
OBS_BC_206746	V2LHS_92309	96.22	76.03	5627	PROS1
OBS_BC_206746	V2LHS_92309	85.71	73.22	5627	PROS1
OBS_BC_206748	V2LHS_116057	71.66	88.03	51249	TMEM69
OBS_BC_206748	V2LHS_116057	68.79	53.33	51249	TMEM69
OBS_BC_206751	V2LHS_111106	59.39	78.03	2533	FYB
OBS_BC_206751	V2LHS_111106	42.14	58.37	2533	FYB
OBS_BC_206760	V2LHS_48528	1.71	7.41	4036	LRP2
OBS_BC_206760	V2LHS_48528	0.61	2.64	4036	LRP2
OBS_BC_206767	V2LHS_156031	11.18	26.82	22950	SLC4A1AP
OBS_BC_206767	V2LHS_156031	10.88	14.17	22950	SLC4A1AP
OBS_BC_206769	V2LHS_131101	30.89	62.94	3574	IL7
OBS_BC_206769	V2LHS_131101	26.69	52.96	3574	IL7
OBS_BC_206770	V2LHS_173445	95.1	97.73	54861	SNRK
OBS_BC_206770	V2LHS_173445	45.62	92.94	54861	SNRK
OBS_BC_206771	V2LHS_84459	74.15	93.13	8886	DDX18
OBS_BC_206771	V2LHS_84459	67.06	92.22	8886	DDX18
OBS_BC_206774	V2LHS_100161	94.63	85.04	8646	CHRD
OBS_BC_206777	V2LHS_219442	2.08	0.06	55334	SLC39A9
OBS_BC_206791	V2LHS_262869	26.53	41.02	84617	TUBB6
OBS_BC_206791	V2LHS_262869	23.56	34.43	84617	TUBB6
OBS_BC_206793	V2LHS_24422	80.08	59.62	8614	STC2
OBS_BC_206793	V2LHS_24422	20.74	52.69	8614	STC2
OBS_BC_206794	V2LHS_252466	28.67	24.21	10216	PRG4
OBS_BC_206794	V2LHS_252466	25.81	19.05	10216	PRG4
OBS_BC_206798	V2LHS_197376	50.81	35.93	7429	VIL1
OBS_BC_206800	V2LHS_66986	56.22	57.9	8434	RECK
OBS_BC_206805	V2LHS_253278	91.71	51.27	3227	HOXC11
OBS_BC_206805	V2LHS_253278	85.38	32.23	3227	HOXC11
OBS_BC_206806	V2LHS_262285	85.83	98.95	54512	EXOSC4
OBS_BC_206806	V2LHS_262285	81.89	98.49	54512	EXOSC4
OBS_BC_206809	V2LHS_38470	34.39	73.29	1496	CTNNA2
OBS_BC_206809	V2LHS_38470	20.4	68.01	1496	CTNNA2
OBS_BC_206810	V2LHS_264961	99.51	80.71	839	CASP6
OBS_BC_206810	V2LHS_264961	94.5	78.44	839	CASP6
OBS_BC_206812	V2LHS_260587	67.36	59.5	54102	CLIC6
OBS_BC_206812	V2LHS_260587	65.34	49.78	54102	CLIC6
OBS_BC_206814	V2LHS_173243	29.22	79.24	5031	P2RY6
OBS_BC_206814	V2LHS_173243	22.09	57.51	5031	P2RY6
OBS_BC_206817	V2LHS_60800	25.55	28.84	1965	EIF2S1
OBS_BC_206822	V2LHS_27383	41.57	96.88	8540	AGPS
OBS_BC_206822	V2LHS_27383	32.01	95.55	8540	AGPS
OBS_BC_206832	V2LHS_236931	14.97	7.39	65986	ZBTB10
OBS_BC_206832	V2LHS_236931	11.19	2.54	65986	ZBTB10
OBS_BC_206839	V2LHS_176693	98.69	84.93	56052	ALG1
OBS_BC_206839	V2LHS_176693	97.72	80.87	56052	ALG1
OBS_BC_206840	V2LHS_253078	67.24	81.02	10445	MCRS1
OBS_BC_206840	V2LHS_253078	50.78	62.77	10445	MCRS1
OBS_BC_206843	V2LHS_155229	22.52	25.12	54840	APTX
OBS_BC_206847	V2LHS_75864	11.6	72.06	4942	OAT
OBS_BC_206847	V2LHS_75864	9.62	64.3	4942	OAT
OBS_BC_206849	V2LHS_32816	70.17	82.37	9218	VAPA
OBS_BC_206849	V2LHS_32816	54.68	78.58	9218	VAPA
OBS_BC_206851	V2LHS_203396	47.12	52.76	5900	RALGDS
OBS_BC_206851	V2LHS_203396	44.46	40.19	5900	RALGDS
OBS_BC_206853	V2LHS_41308	19.97	19.91	-	-
OBS_BC_206856	V2LHS_59634	49.66	76.58	222537, 100130406	HS3ST5, NBLA04021
OBS_BC_206856	V2LHS_59634	30.38	75.38	222537, 100130406	HS3ST5, NBLA04021
OBS_BC_206857	V2LHS_138761	87.29	75.67	-	-
OBS_BC_206857	V2LHS_138761	85.93	45.87	-	-
OBS_BC_206858	V2LHS_170225	36.21	75.74	5434	POLR2E
OBS_BC_206858	V2LHS_170225	25.63	72.72	5434	POLR2E
OBS_BC_206861	V2LHS_258248	48.68	47.92	-	-
OBS_BC_206861	V2LHS_258248	44.54	34.69	-	-
OBS_BC_206863	V2LHS_245746	64.96	39.01	7084	TK2
OBS_BC_206863	V2LHS_245746	40.02	36.39	7084	TK2
OBS_BC_206865	V2LHS_96520	80.42	60.54	25896	INTS7
OBS_BC_206865	V2LHS_96520	79.07	55.26	25896	INTS7
OBS_BC_206866	V2LHS_198039	45.52	54.03	23473	CAPN7
OBS_BC_206866	V2LHS_198039	33.08	45.59	23473	CAPN7
OBS_BC_206867	V2LHS_260303	82.62	70.23	3988	LIPA
OBS_BC_206867	V2LHS_260303	69.06	62.61	3988	LIPA
OBS_BC_206871	V2LHS_220438	73.31	3.18	271	AMPD2
OBS_BC_206871	V2LHS_220438	60.23	0.11	271	AMPD2
OBS_BC_206872	V2LHS_169863	90.11	87.73	5196	PF4
OBS_BC_206872	V2LHS_169863	76.01	71.02	5196	PF4
OBS_BC_206874	V2LHS_70559	30.91	70.29	10325, 10670	RRAGB, RRAGA
OBS_BC_206874	V2LHS_70559	28.65	60.9	10325, 10670	RRAGB, RRAGA
OBS_BC_206880	V2LHS_73435	85.47	97.09	9751	SNPH
OBS_BC_206880	V2LHS_73435	82.01	94.7	9751	SNPH
OBS_BC_206884	V2LHS_175230	95.68	95.39	54665	RSBN1
OBS_BC_206884	V2LHS_175230	80.92	93.27	54665	RSBN1
OBS_BC_206888	V2LHS_113948	38.61	3.57	2342	FNTB
OBS_BC_206888	V2LHS_113948	16.89	2.78	2342	FNTB
OBS_BC_206892	V2LHS_222608	96.15	95.6	7472	WNT2
OBS_BC_206893	V2LHS_230572	39.3	81.28	26164	GTPBP5
OBS_BC_206895	V2LHS_95997	24.95	17.53	22845	DOLK
OBS_BC_206903	V2LHS_118864	68.25	69.66	10920	COPS8
OBS_BC_206903	V2LHS_118864	65.56	64.72	10920	COPS8
OBS_BC_206908	V2LHS_140519	51.41	82.8	5986	RFNG
OBS_BC_206908	V2LHS_140519	44.08	77.44	5986	RFNG
OBS_BC_206925	V2LHS_80904	9.89	93.14	9021	SOCS3
OBS_BC_206925	V2LHS_80904	8.69	67.37	9021	SOCS3
OBS_BC_206926	V2LHS_250302	11.46	28.58	26257	NKX2-8
OBS_BC_206926	V2LHS_250302	9.66	24.7	26257	NKX2-8
OBS_BC_206927	V2LHS_199392	69.47	98.58	11201	POLI
OBS_BC_206934	V2LHS_169974	62.5	43.13	5271	SERPINB8
OBS_BC_206934	V2LHS_169974	61.65	31.21	5271	SERPINB8
OBS_BC_206939	V2LHS_153000	27.18	56.77	6533	SLC6A6
OBS_BC_206939	V2LHS_153000	19.25	19.51	6533	SLC6A6
OBS_BC_206940	V2LHS_96415	10.91	59.68	25870	SUMF2
OBS_BC_206940	V2LHS_96415	8.84	55.77	25870	SUMF2
OBS_BC_206943	V2LHS_96676	52.53	33.97	25942	SIN3A
OBS_BC_206944	V2LHS_157015	6.84	0.7	79695	GALNT12
OBS_BC_206944	V2LHS_157015	4.81	0.52	79695	GALNT12
OBS_BC_206945	V2LHS_194767	86.53	91.13	4584, 57876, 732162	MUC3A, MUC3B, LOC732162
OBS_BC_206945	V2LHS_194767	79.77	70.09	4584, 57876, 732162	MUC3A, MUC3B, LOC732162
OBS_BC_206948	V2LHS_33832	43.29	51.61	7439	BEST1
OBS_BC_206948	V2LHS_33832	36.45	39.57	7439	BEST1
OBS_BC_206953	V2LHS_242506	62.21	30.95	52	ACP1
OBS_BC_206953	V2LHS_242506	43.15	27.29	52	ACP1
OBS_BC_206954	V2LHS_98229	39.27	7.97	64710	NUCKS1
OBS_BC_206954	V2LHS_98229	37.95	6.62	64710	NUCKS1
OBS_BC_206956	V2LHS_87191	71.86	35.73	23205	ACSBG1
OBS_BC_206956	V2LHS_87191	38.17	26.83	23205	ACSBG1
OBS_BC_206957	V2LHS_15841	9.99	29	26263	FBXO22
OBS_BC_206957	V2LHS_15841	8	27.44	26263	FBXO22
OBS_BC_206961	V2LHS_198415	81.85	50.35	10471	PFDN6
OBS_BC_206961	V2LHS_198415	70.81	31.51	10471	PFDN6
OBS_BC_206965	V2LHS_71187	50.39	23.12	10013	HDAC6
OBS_BC_206965	V2LHS_71187	33.55	17.11	10013	HDAC6
OBS_BC_206967	V2LHS_198995	63.71	74.98	11158, 11159, 100134327	RABL2B, RABL2A, LOC100134327
OBS_BC_206967	V2LHS_198995	46.24	62.33	11158, 11159, 100134327	RABL2B, RABL2A, LOC100134327
OBS_BC_206972	V2LHS_223430	70.34	96.11	5277	PIGA
OBS_BC_206972	V2LHS_223430	64.43	93.91	5277	PIGA
OBS_BC_206975	V2LHS_136909	27.02	89.59	80155	NARG1
OBS_BC_206975	V2LHS_136909	17.5	87.12	80155	NARG1
OBS_BC_206977	V2LHS_150256	51.41	89.06	861	RUNX1
OBS_BC_206977	V2LHS_150256	35.16	83.41	861	RUNX1
OBS_BC_206978	V2LHS_175813	1.01	3.32	55858	TMEM165
OBS_BC_206978	V2LHS_175813	0.67	2.77	55858	TMEM165
OBS_BC_206980	V2LHS_133101	73.35	75.67	3157	HMGCS1
OBS_BC_206980	V2LHS_133101	54.23	35.58	3157	HMGCS1
OBS_BC_206982	V2LHS_99446	30	52	83452	RAB33B
OBS_BC_206984	V2LHS_202139	30.76	46.43	65975	STK33
OBS_BC_206985	V2LHS_150657	66.76	31.58	8218	CLTCL1
OBS_BC_206985	V2LHS_150657	65.81	29.97	8218	CLTCL1
OBS_BC_206986	V2LHS_170893	16.75	71.46	5764	PTN
OBS_BC_206986	V2LHS_170893	16.46	39.14	5764	PTN
OBS_BC_206989	V2LHS_197088	90.02	41.32	10087	COL4A3BP
OBS_BC_206990	V2LHS_158872	98.01	22.55	83903	GSG2
OBS_BC_206990	V2LHS_158872	87.21	16.21	83903	GSG2
OBS_BC_206995	V2LHS_285514	44.65	29.75	403314	APOBEC4
OBS_BC_206995	V2LHS_285514	22.98	20.3	403314	APOBEC4
OBS_BC_206996	V2LHS_93064	75.41	19.36	5244	ABCB4
OBS_BC_206996	V2LHS_93064	44.61	13.99	5244	ABCB4
OBS_BC_206999	V2LHS_41610	69.87	35.81	389084	UNQ830
OBS_BC_207008	V2LHS_46218	93.57	42.25	286756	SCAMPER
OBS_BC_207008	V2LHS_46218	82.71	39.27	286756	SCAMPER
OBS_BC_207009	V2LHS_260501	41.73	69.8	147179	WIPF2
OBS_BC_207009	V2LHS_260501	33.87	66.02	147179	WIPF2
OBS_BC_207012	V2LHS_240598	74.1	34.54	6545	SLC7A4
OBS_BC_207012	V2LHS_240598	61.07	31.15	6545	SLC7A4
OBS_BC_207013	V2LHS_173060	88.11	89.52	2259	FGF14
OBS_BC_207013	V2LHS_173060	88	73.57	2259	FGF14
OBS_BC_207014	V2LHS_112185	53.54	35.63	722	C4BPA
OBS_BC_207014	V2LHS_112185	39.83	34.73	722	C4BPA
OBS_BC_207018	V2LHS_243686	86.65	45.4	-	-
OBS_BC_207018	V2LHS_243686	54.59	34.61	-	-
OBS_BC_207019	V2LHS_113117	84.9	26.62	1230	CCR1
OBS_BC_207019	V2LHS_113117	70.28	24.33	1230	CCR1
OBS_BC_207021	V2LHS_18359	81.25	9.75	23523	CABIN1
OBS_BC_207022	V2LHS_51716	68.27	14.01	56916	SMARCAD1
OBS_BC_207022	V2LHS_51716	59.77	7.68	56916	SMARCAD1
OBS_BC_207023	V2LHS_227310	38.83	65.59	6387	CXCL12
OBS_BC_207023	V2LHS_227310	38	33.52	6387	CXCL12
OBS_BC_207024	V2LHS_285279	39.13	74.11	378465	HSN2
OBS_BC_207027	V2LHS_91427	99.55	99.58	27333	GOLIM4
OBS_BC_207027	V2LHS_91427	98.08	99.33	27333	GOLIM4
OBS_BC_207030	V2LHS_235586	59.79	50.11	54497	HEATR5B
OBS_BC_207030	V2LHS_235586	58.38	49.53	54497	HEATR5B
OBS_BC_207032	V2LHS_84707	65.87	15.76	6856	SYPL1
OBS_BC_207037	V2LHS_197782	75.28	57.09	26468	LHX6
OBS_BC_207037	V2LHS_197782	67.26	36.84	26468	LHX6
OBS_BC_207040	V2LHS_80182	79.41	35.97	23336	DMN
OBS_BC_207043	V2LHS_190350	59.7	51.88	1355	COX15
OBS_BC_207043	V2LHS_190350	46.18	45.21	1355	COX15
OBS_BC_207044	V2LHS_222241	77.89	58.7	199964	TMEM61
OBS_BC_207044	V2LHS_222241	67.7	45.46	199964	TMEM61
OBS_BC_207045	V2LHS_197897	25.83	79.79	10694	CCT8
OBS_BC_207050	V2LHS_174072	40.11	77.82	54947	LPCAT2
OBS_BC_207050	V2LHS_174072	26.56	62.18	54947	LPCAT2
OBS_BC_207052	V2LHS_224489	24.65	22.9	887	CCKBR
OBS_BC_207052	V2LHS_224489	17.66	22.54	887	CCKBR
OBS_BC_207066	V2LHS_113857	66.51	81.06	2272	FHIT
OBS_BC_207066	V2LHS_113857	58.92	74.86	2272	FHIT
OBS_BC_207069	V2LHS_153737	51.4	20.7	6873	TAF2
OBS_BC_207069	V2LHS_153737	41.39	19.43	6873	TAF2
OBS_BC_207071	V2LHS_170727	7.26	61.39	5692	PSMB4
OBS_BC_207071	V2LHS_170727	5.37	56.92	5692	PSMB4
OBS_BC_207072	V2LHS_199204	39.32	52.25	10574	CCT7
OBS_BC_207072	V2LHS_199204	37.85	40.65	10574	CCT7
OBS_BC_207073	V2LHS_156677	93.37	19.14	55269	PSPC1
OBS_BC_207073	V2LHS_156677	92.79	16.43	55269	PSPC1
OBS_BC_207079	V2LHS_82896	77.96	15.52	79190	IRX6
OBS_BC_207080	V2LHS_137913	58.09	78.6	81873	ARPC5L
OBS_BC_207080	V2LHS_137913	55.96	72.51	81873	ARPC5L
OBS_BC_207084	V2LHS_58219	62.65	69.41	57393	TMEM27
OBS_BC_207084	V2LHS_58219	46.48	53.2	57393	TMEM27
OBS_BC_207100	V2LHS_69357	70.06	87.39	8320	EOMES
OBS_BC_207100	V2LHS_69357	64.62	44.59	8320	EOMES
OBS_BC_207102	V2LHS_51796	27.78	17.85	26528	DAZAP1
OBS_BC_207102	V2LHS_51796	26.06	8.36	26528	DAZAP1
OBS_BC_207105	V2LHS_16810	90.18	70.5	135886	WBSCR28
OBS_BC_207105	V2LHS_16810	88.44	60.31	135886	WBSCR28
OBS_BC_207110	V2LHS_64295	77.15	51.89	950	SCARB2
OBS_BC_207112	V2LHS_175239	98.29	69.84	55330	CNO
OBS_BC_207112	V2LHS_175239	96.41	38.02	55330	CNO
OBS_BC_207113	V2LHS_76027	36.95	51.32	4763	NF1
OBS_BC_207113	V2LHS_76027	24.3	45.25	4763	NF1
OBS_BC_207116	V2LHS_77949	89.53	16.31	116444	GRIN3B
OBS_BC_207116	V2LHS_77949	86.91	11.01	116444	GRIN3B
OBS_BC_207119	V2LHS_83588	31.76	57.98	2200	FBN1
OBS_BC_207119	V2LHS_83588	22.96	55.03	2200	FBN1
OBS_BC_207120	V2LHS_157244	86.74	23.39	79738	BBS10
OBS_BC_207121	V2LHS_113545	42.13	12.41	1808	DPYSL2
OBS_BC_207122	V2LHS_90366	71.24	48.78	10874	NMU
OBS_BC_207122	V2LHS_90366	70.43	47.97	10874	NMU
OBS_BC_207124	V2LHS_59014	51.47	82.98	5144	PDE4D
OBS_BC_207124	V2LHS_59014	49.1	70.38	5144	PDE4D
OBS_BC_207127	V2LHS_173283	49.72	2.83	5861	RAB1A
OBS_BC_207127	V2LHS_173283	29.16	2.18	5861	RAB1A
OBS_BC_207128	V2LHS_253144	91.29	5.43	11145	HRASLS3
OBS_BC_207128	V2LHS_253144	91.14	5.39	11145	HRASLS3
OBS_BC_207131	V2LHS_201832	74.21	78.32	23016	EXOSC7
OBS_BC_207131	V2LHS_201832	67.39	38.11	23016	EXOSC7
OBS_BC_207133	V2LHS_181966	71.92	96.2	200728	TMEM17
OBS_BC_207134	V2LHS_176549	4.96	51.29	54556	ING3
OBS_BC_207136	V2LHS_36305	81.08	94.8	9219	MTA2
OBS_BC_207136	V2LHS_36305	67.94	93.16	9219	MTA2
OBS_BC_207143	V2LHS_217322	45.51	18.35	57514	CDGAP
OBS_BC_207144	V2LHS_82356	23.24	96.17	3293	HSD17B3
OBS_BC_207145	V2LHS_159328	7.72	12.18	84659	RNASE7
OBS_BC_207145	V2LHS_159328	6.63	8.81	84659	RNASE7
OBS_BC_207153	V2LHS_42532	46.27	86.12	2678, 2679, 643171, 650860, 653590, 728226, 728441	GGT1, GGT3P, GGT4P, LOC650860, GGTLC5P, GGTLC3, GGT2
OBS_BC_207153	V2LHS_42532	27.54	78.81	2678, 2679, 643171, 650860, 653590, 728226, 728441	GGT1, GGT3P, GGT4P, LOC650860, GGTLC5P, GGTLC3, GGT2
OBS_BC_207154	V2LHS_257891	3.8	99.36	3030	HADHA
OBS_BC_207154	V2LHS_257891	3.15	98.55	3030	HADHA
OBS_BC_207155	V2LHS_218270	37.66	19.6	55627, 150776	SMPD4, FLJ41352
OBS_BC_207155	V2LHS_218270	34.32	10.19	55627, 150776	SMPD4, FLJ41352
OBS_BC_207156	V2LHS_16967	29.9	28.44	2804	GOLGB1
OBS_BC_207156	V2LHS_16967	16.64	25.62	2804	GOLGB1
OBS_BC_207158	V2LHS_112366	41.97	85.71	1140	CHRNB1
OBS_BC_207158	V2LHS_112366	38.28	68.87	1140	CHRNB1
OBS_BC_207162	V2LHS_230644	37.55	64.06	3858	KRT10
OBS_BC_207162	V2LHS_230644	25.82	32.94	3858	KRT10
OBS_BC_207166	V2LHS_239622	13.52	20.57	5465	PPARA
OBS_BC_207167	V2LHS_210568	95.95	88.1	26278	SACS
OBS_BC_207170	V2LHS_33352	91.88	95.88	317703, 653753	VN1R4, LOC653753
OBS_BC_207170	V2LHS_33352	59.53	95.41	317703, 653753	VN1R4, LOC653753
OBS_BC_207173	V2LHS_71740	73.05	56.71	25814	ATXN10
OBS_BC_207173	V2LHS_71740	68.05	55.27	25814	ATXN10
OBS_BC_207175	V2LHS_189774	76.17	37.37	64122	FN3K
OBS_BC_207175	V2LHS_189774	62.71	26.62	64122	FN3K
OBS_BC_207178	V2LHS_251405	91.94	63.31	23077	MYCBP2
OBS_BC_207178	V2LHS_251405	83.79	57.6	23077	MYCBP2
OBS_BC_207180	V2LHS_97557	41.63	65.63	51125	GOLGA7
OBS_BC_207180	V2LHS_97557	36.6	60.53	51125	GOLGA7
OBS_BC_207184	V2LHS_70016	62.64	50.56	7007	TECTA
OBS_BC_207186	V2LHS_57042	4.29	49.45	5978	REST
OBS_BC_207186	V2LHS_57042	3.95	44.22	5978	REST
OBS_BC_207187	V2LHS_218096	94.8	54.85	55617	TASP1
OBS_BC_207187	V2LHS_218096	89.62	53.97	55617	TASP1
OBS_BC_207193	V2LHS_244554	73.9	43.53	255928	SYT14
OBS_BC_207193	V2LHS_244554	51.5	39.74	255928	SYT14
OBS_BC_207197	V2LHS_58818	90.05	76.92	123041	SLC24A4
OBS_BC_207197	V2LHS_58818	84.08	57.17	123041	SLC24A4
OBS_BC_207198	V2LHS_210715	50.34	41.3	10273	STUB1
OBS_BC_207198	V2LHS_210715	48.22	20.47	10273	STUB1
OBS_BC_207200	V2LHS_191617	66.49	64.08	5544	PRB3
OBS_BC_207200	V2LHS_191617	60.31	63.98	5544	PRB3
OBS_BC_207202	V2LHS_32527	51.49	33.94	8451	CUL4A
OBS_BC_207206	V2LHS_139217	49.25	53.46	165140	OXER1
OBS_BC_207221	V2LHS_57167	87.75	32.41	3172	HNF4A
OBS_BC_207221	V2LHS_57167	74.84	20.39	3172	HNF4A
OBS_BC_207226	V2LHS_198770	12.52	49.44	10164	CHST4
OBS_BC_207229	V2LHS_35066	8.1	8.75	-	-
OBS_BC_207230	V2LHS_85329	65.59	62.37	30836	DNTTIP2
OBS_BC_207230	V2LHS_85329	49.78	42.92	30836	DNTTIP2
OBS_BC_207233	V2LHS_261168	86.36	76.12	10923	SUB1
OBS_BC_207233	V2LHS_261168	83.33	70.66	10923	SUB1
OBS_BC_207236	V2LHS_198668	42.69	10.93	25816	TNFAIP8
OBS_BC_207236	V2LHS_198668	38.12	9.64	25816	TNFAIP8
OBS_BC_207241	V2LHS_60163	5.51	30.53	28960	DCPS
OBS_BC_207241	V2LHS_60163	4.99	23.53	28960	DCPS
OBS_BC_207250	V2LHS_202920	97.16	71.63	546, 652455, 728849	ATRX, LOC652455, LOC728849
OBS_BC_207250	V2LHS_202920	93.86	65.13	546, 652455, 728849	ATRX, LOC652455, LOC728849
OBS_BC_207256	V2LHS_213130	20.54	0.71	27257	LSM1
OBS_BC_207257	V2LHS_151872	91.53	79.27	4332	MNDA
OBS_BC_207257	V2LHS_151872	44.88	28.88	4332	MNDA
OBS_BC_207259	V2LHS_66254	86.62	63.64	57786	RBAK
OBS_BC_207259	V2LHS_66254	58.33	44.46	57786	RBAK
OBS_BC_207262	V2LHS_28281	22.22	8.95	9318	COPS2
OBS_BC_207262	V2LHS_28281	11.43	5.84	9318	COPS2
OBS_BC_207265	V2LHS_48543	28.6	63.18	766	CA7
OBS_BC_207265	V2LHS_48543	19.69	58.51	766	CA7
OBS_BC_207268	V2LHS_226081	98.5	42.43	2357	FPR1
OBS_BC_207268	V2LHS_226081	94.11	39.95	2357	FPR1
OBS_BC_207270	V2LHS_68983	63.95	86.21	9378	NRXN1
OBS_BC_207270	V2LHS_68983	62.55	73.41	9378	NRXN1
OBS_BC_207271	V2LHS_97274	76.13	79.86	51011, 151313	FAHD2A, FAHD2B
OBS_BC_207271	V2LHS_97274	73.47	78.21	51011, 151313	FAHD2A, FAHD2B
OBS_BC_207276	V2LHS_134765	22.65	41.67	51265	CDKL3
OBS_BC_207282	V2LHS_76497	81.6	31.29	4292	MLH1
OBS_BC_207282	V2LHS_76497	49.92	28.79	4292	MLH1
OBS_BC_207283	V2LHS_87449	0.45	3.05	64216	TFB2M
OBS_BC_207283	V2LHS_87449	0.43	2.29	64216	TFB2M
OBS_BC_207286	V2LHS_223974	80.88	93.51	114823	LENG8
OBS_BC_207286	V2LHS_223974	69.46	86.64	114823	LENG8
OBS_BC_207287	V2LHS_67635	41.71	33.18	9533	POLR1C
OBS_BC_207287	V2LHS_67635	33.82	24.78	9533	POLR1C
OBS_BC_207292	V2LHS_36673	76.54	66.5	9179	AP4M1
OBS_BC_207293	V2LHS_230778	12.66	22.49	6121	RPE65
OBS_BC_207295	V2LHS_98967	82.51	33.76	79058	ASPSCR1
OBS_BC_207295	V2LHS_98967	70.14	32.11	79058	ASPSCR1
OBS_BC_207296	V2LHS_172903	83.17	81.33	1678	TIMM8A
OBS_BC_207296	V2LHS_172903	75.02	78.56	1678	TIMM8A
OBS_BC_207297	V2LHS_150098	29.67	94.46	680	BRS3
OBS_BC_207297	V2LHS_150098	29.55	89.78	680	BRS3
OBS_BC_207298	V2LHS_150731	92.88	72.19	1291	COL6A1
OBS_BC_207299	V2LHS_255274	97.79	95.56	9775	EIF4A3
OBS_BC_207299	V2LHS_255274	96.98	92.09	9775	EIF4A3
OBS_BC_207300	V2LHS_19972	20.27	48.25	5169	ENPP3
OBS_BC_207300	V2LHS_19972	18.14	35.51	5169	ENPP3
OBS_BC_207303	V2LHS_201323	57.52	33.44	57665	RDH14
OBS_BC_207309	V2LHS_77658	44.12	87.68	11034	DSTN
OBS_BC_207309	V2LHS_77658	26.33	87.66	11034	DSTN
OBS_BC_207310	V2LHS_202713	40.27	98.71	2778	GNAS
OBS_BC_207310	V2LHS_202713	30.17	96.12	2778	GNAS
OBS_BC_207316	V2LHS_252959	26.21	50.19	23759	PPIL2
OBS_BC_207316	V2LHS_252959	22.29	46.65	23759	PPIL2
OBS_BC_207318	V2LHS_132677	22.66	56.68	375	ARF1
OBS_BC_207322	V2LHS_24157	79.43	49.47	134265	AFAP1L1
OBS_BC_207322	V2LHS_24157	79.26	45.69	134265	AFAP1L1
OBS_BC_207329	V2LHS_67776	26.24	12.72	6160, 387991, 390283, 653773, 729646, 100130130	RPL31, RPL31P4, RPL31P10, LOC653773, LOC729646, LOC100130130
OBS_BC_207329	V2LHS_67776	25.49	8.82	6160, 387991, 390283, 653773, 729646, 100130130	RPL31, RPL31P4, RPL31P10, LOC653773, LOC729646, LOC100130130
OBS_BC_207331	V2LHS_260920	78.14	23.46	441140	FLJ45422
OBS_BC_207331	V2LHS_260920	69.16	18.94	441140	FLJ45422
OBS_BC_207333	V2LHS_197365	61.09	80.92	23788	MTCH2
OBS_BC_207334	V2LHS_78718	55.73	51.65	9491	PSMF1
OBS_BC_207334	V2LHS_78718	47.3	50.92	9491	PSMF1
OBS_BC_207342	V2LHS_150334	21.79	53.76	930	CD19
OBS_BC_207345	V2LHS_60805	73.38	69.53	1965	EIF2S1
OBS_BC_207348	V2LHS_74463	73.04	66.01	23484	LEPROTL1
OBS_BC_207349	V2LHS_177906	11.06	96.78	84944	MAEL
OBS_BC_207349	V2LHS_177906	5.12	95.83	84944	MAEL
OBS_BC_207350	V2LHS_150240	64.07	72.61	831	CAST
OBS_BC_207350	V2LHS_150240	63.2	69.99	831	CAST
OBS_BC_207352	V2LHS_154409	11.84	5.87	54149	C21orf91
OBS_BC_207352	V2LHS_154409	7.72	5.24	54149	C21orf91
OBS_BC_207353	V2LHS_235857	89.15	96.72	3763	KCNJ6
OBS_BC_207353	V2LHS_235857	80.98	93.22	3763	KCNJ6
OBS_BC_207360	V2LHS_240418	93.05	66.65	26762	HAVCR1
OBS_BC_207360	V2LHS_240418	88.28	51.7	26762	HAVCR1
OBS_BC_207367	V2LHS_28596	32.22	19.47	23499	MACF1
OBS_BC_207367	V2LHS_28596	31.06	13.5	23499	MACF1
OBS_BC_207371	V2LHS_59039	94.1	96.29	9502, 170626, 728242	XAGE2, XAGE3, CTD-2267G17.3
OBS_BC_207372	V2LHS_134465	98.48	87.75	51008	ASCC1
OBS_BC_207372	V2LHS_134465	93.01	78.25	51008	ASCC1
OBS_BC_207379	V2LHS_43816	8.09	97.97	-	-
OBS_BC_207379	V2LHS_43816	6.49	73.66	-	-
OBS_BC_207381	V2LHS_169780	50.5	46.78	5152	PDE9A
OBS_BC_207385	V2LHS_194190	86.54	83.91	8558	CDK10
OBS_BC_207385	V2LHS_194190	84.4	83.52	8558	CDK10
OBS_BC_207392	V2LHS_239511	61.97	54.56	6096	RORB
OBS_BC_207398	V2LHS_43326	67.34	70.94	2066	ERBB4
OBS_BC_207398	V2LHS_43326	60.2	54.72	2066	ERBB4
OBS_BC_207399	V2LHS_94422	37.23	55.4	173	AFM
OBS_BC_207404	V2LHS_195825	31.25	38.89	404552	SCGB1D4
OBS_BC_207404	V2LHS_195825	25.97	29.22	404552	SCGB1D4
OBS_BC_207406	V2LHS_197630	87.9	99.68	6291	SAA4
OBS_BC_207406	V2LHS_197630	86.06	99.39	6291	SAA4
OBS_BC_207408	V2LHS_215480	73.11	75.5	256281	NUDT14
OBS_BC_207408	V2LHS_215480	57.5	71.16	256281	NUDT14
OBS_BC_207419	V2LHS_197759	19.95	23.87	7030	TFE3
OBS_BC_207419	V2LHS_197759	9.91	19.09	7030	TFE3
OBS_BC_207425	V2LHS_111930	1.67	99.94	128, 642443	ADH5, RCADH5
OBS_BC_207425	V2LHS_111930	0.64	99.89	128, 642443	ADH5, RCADH5
OBS_BC_207426	V2LHS_137750	64.47	71.08	81669	CCNL2
OBS_BC_207426	V2LHS_137750	64.08	51.12	81669	CCNL2
OBS_BC_207430	V2LHS_33774	77.73	41.12	7482	WNT2B
OBS_BC_207430	V2LHS_33774	77.52	37.66	7482	WNT2B
OBS_BC_207433	V2LHS_64210	54.13	58.77	29954	POMT2
OBS_BC_207451	V2LHS_276115	85.88	62.93	85012	TCEAL3
OBS_BC_207451	V2LHS_276115	74.1	35.79	85012	TCEAL3
OBS_BC_207457	V2LHS_151216	74.45	72.5	1805	DPT
OBS_BC_207457	V2LHS_151216	73.94	71.32	1805	DPT
OBS_BC_207462	V2LHS_227005	57.35	51.03	23105	FSTL4
OBS_BC_207466	V2LHS_49239	50.86	86.41	27	ABL2
OBS_BC_207467	V2LHS_188269	92.16	88.48	6045, 100132467	RNF2, LOC100132467
OBS_BC_207469	V2LHS_96741	49.4	78.92	25963	TMEM87A
OBS_BC_207469	V2LHS_96741	34.16	56.45	25963	TMEM87A
OBS_BC_207476	V2LHS_226370	17.35	3.15	10517, 374286, 100133998	FBXW10, CDRT1, LOC100133998
OBS_BC_207476	V2LHS_226370	16.15	1.82	10517, 374286, 100133998	FBXW10, CDRT1, LOC100133998
OBS_BC_207478	V2LHS_93641	92.97	61.58	7450	VWF
OBS_BC_207485	V2LHS_262837	0.17	3.48	63941	NECAB3
OBS_BC_207488	V2LHS_197809	58.42	12.46	10577	NPC2
OBS_BC_207488	V2LHS_197809	49.24	10.38	10577	NPC2
OBS_BC_207495	V2LHS_48641	78.79	57.79	5275	SERPINB13
OBS_BC_207495	V2LHS_48641	78.13	54.83	5275	SERPINB13
OBS_BC_207496	V2LHS_252883	19.48	13.22	11137	PWP1
OBS_BC_207496	V2LHS_252883	18.76	3.6	11137	PWP1
OBS_BC_207499	V2LHS_131037	50.75	38.25	3359	HTR3A
OBS_BC_207499	V2LHS_131037	45.55	32.45	3359	HTR3A
OBS_BC_207501	V2LHS_215793	29.21	30	5575	PRKAR1B
OBS_BC_207504	V2LHS_65932	25.68	44.14	57824	HMHB1
OBS_BC_207508	V2LHS_202716	54.38	91.5	773	CACNA1A
OBS_BC_207508	V2LHS_202716	46.11	90.08	773	CACNA1A
OBS_BC_207512	V2LHS_151241	64.05	2.95	1825	DSC3
OBS_BC_207512	V2LHS_151241	63.73	1.42	1825	DSC3
OBS_BC_207516	V2LHS_219019	47.37	70.85	7783	ZP2
OBS_BC_207516	V2LHS_219019	46.41	46.6	7783	ZP2
OBS_BC_207523	V2LHS_138231	72.67	44.68	84227, 353299	RGSL2, RGSL1
OBS_BC_207523	V2LHS_138231	39.61	39.31	84227, 353299	RGSL2, RGSL1
OBS_BC_207526	V2LHS_150079	91.61	98.79	667	DST
OBS_BC_207528	V2LHS_17941	3.87	9.81	2021	ENDOG
OBS_BC_207528	V2LHS_17941	2.66	2.97	2021	ENDOG
OBS_BC_207529	V2LHS_17726	27.16	64.76	2058	EPRS
OBS_BC_207531	V2LHS_285360	84.37	39.21	129025	ZNF280A
OBS_BC_207533	V2LHS_84610	96.29	41.36	7832	BTG2
OBS_BC_207533	V2LHS_84610	76.67	40.09	7832	BTG2
OBS_BC_207539	V2LHS_59220	71.78	87.14	8074	FGF23
OBS_BC_207539	V2LHS_59220	57.47	62.22	8074	FGF23
OBS_BC_207542	V2LHS_51946	21.64	66.56	4212	MEIS2
OBS_BC_207542	V2LHS_51946	13.91	61.26	4212	MEIS2
OBS_BC_207544	V2LHS_209104	98.33	92.12	10274	STAG1
OBS_BC_207544	V2LHS_209104	93.27	81.89	10274	STAG1
OBS_BC_207545	V2LHS_28220	2.98	5.81	9333	TGM5
OBS_BC_207545	V2LHS_28220	2.75	4.72	9333	TGM5
OBS_BC_207548	V2LHS_58432	15.22	80.78	5303	PIN4
OBS_BC_207548	V2LHS_58432	10.94	71.12	5303	PIN4
OBS_BC_207549	V2LHS_285321	41.86	90.84	128817	CSTL1
OBS_BC_207553	V2LHS_19731	76.74	94.63	5358	PLS3
OBS_BC_207553	V2LHS_19731	71.1	86.69	5358	PLS3
OBS_BC_207554	V2LHS_198892	55.48	21.11	10549	PRDX4
OBS_BC_207557	V2LHS_56162	84.7	82.58	7024	TFCP2
OBS_BC_207557	V2LHS_56162	84.09	75.26	7024	TFCP2
OBS_BC_207558	V2LHS_117217	70.76	72.21	83539	CHST9
OBS_BC_207558	V2LHS_117217	56.13	70.37	83539	CHST9
OBS_BC_207560	V2LHS_94497	28.12	77	292, 442255	SLC25A5, LOC442255
OBS_BC_207560	V2LHS_94497	27.43	75.45	292, 442255	SLC25A5, LOC442255
OBS_BC_207561	V2LHS_179013	17.54	63.33	285596, 653316	FAM153A, FAM153C
OBS_BC_207561	V2LHS_179013	16.42	53.8	285596, 653316	FAM153A, FAM153C
OBS_BC_207562	V2LHS_57537	78.99	75.56	50511	SYCP3
OBS_BC_207565	V2LHS_150010	76.2	85.67	634	CEACAM1
OBS_BC_207567	V2LHS_31972	23.33	98.36	6256	RXRA
OBS_BC_207567	V2LHS_31972	14.61	89.34	6256	RXRA
OBS_BC_207574	V2LHS_202509	60.58	37.32	1788	DNMT3A
OBS_BC_207574	V2LHS_202509	47.48	26.66	1788	DNMT3A
OBS_BC_207576	V2LHS_28175	63.29	29.28	9364	RAB28
OBS_BC_207576	V2LHS_28175	50.41	22.88	9364	RAB28
OBS_BC_207577	V2LHS_175296	41.68	79.01	55334	SLC39A9
OBS_BC_207577	V2LHS_175296	32.19	75.8	55334	SLC39A9
OBS_BC_207580	V2LHS_20135	85.29	1.63	145781	Gcom1
OBS_BC_207585	V2LHS_252457	92.28	94	4176	MCM7
OBS_BC_207588	V2LHS_85575	32.36	91.34	23317	DNAJC13
OBS_BC_207588	V2LHS_85575	22.21	88.15	23317	DNAJC13
OBS_BC_207591	V2LHS_212368	82.14	21.78	253935	ANGPTL5
OBS_BC_207599	V2LHS_112642	84.3	82.95	708	C1QBP
OBS_BC_207599	V2LHS_112642	38.14	65.32	708	C1QBP
OBS_BC_207602	V2LHS_88641	92.97	21.77	1184	CLCN5
OBS_BC_207603	V2LHS_224079	31.31	20.71	221458	KIF6
OBS_BC_207606	V2LHS_99525	0.11	2.21	83596	BCL2L12
OBS_BC_207606	V2LHS_99525	0.02	1.8	83596	BCL2L12
OBS_BC_207614	V2LHS_221127	9.09	23.08	5228	PGF
OBS_BC_207614	V2LHS_221127	8.54	21.71	5228	PGF
OBS_BC_207616	V2LHS_242218	66.92	36.42	51465, 55619	UBE2J1, DOCK10
OBS_BC_207616	V2LHS_242218	60.57	28.23	51465, 55619	UBE2J1, DOCK10
OBS_BC_207617	V2LHS_132885	60.75	54.29	549	AUH
OBS_BC_207617	V2LHS_132885	48.84	36.4	549	AUH
OBS_BC_207622	V2LHS_136929	86.39	39.06	11316	COPE
OBS_BC_207622	V2LHS_136929	56.7	31.63	11316	COPE
OBS_BC_207623	V2LHS_92321	21.07	39.2	5741	PTH
OBS_BC_207623	V2LHS_92321	20.42	19.72	5741	PTH
OBS_BC_207627	V2LHS_42304	98.64	98.13	2823	GPM6A
OBS_BC_207627	V2LHS_42304	94.84	98.09	2823	GPM6A
OBS_BC_207628	V2LHS_175280	89.24	89.67	55333	SYNJ2BP
OBS_BC_207628	V2LHS_175280	74.22	76.52	55333	SYNJ2BP
OBS_BC_207635	V2LHS_236627	44.37	17.8	3105	HLA-A
OBS_BC_207635	V2LHS_236627	29.72	15.53	3105	HLA-A
OBS_BC_207641	V2LHS_195955	87.56	48.87	29978	UBQLN2
OBS_BC_207641	V2LHS_195955	87.03	46.09	29978	UBQLN2
OBS_BC_207644	V2LHS_252342	82.25	94.18	10186	LHFP
OBS_BC_207644	V2LHS_252342	81.74	88.54	10186	LHFP
OBS_BC_207645	V2LHS_15394	34.92	57.37	152719	LOC152719
OBS_BC_207647	V2LHS_94811	61.18	35.16	6048, 286140	RNF5, RNF5P1
OBS_BC_207648	V2LHS_42554	99.84	98.56	3161	HMMR
OBS_BC_207648	V2LHS_42554	97.24	98.01	3161	HMMR
OBS_BC_207649	V2LHS_131347	55.71	54.2	5243	ABCB1
OBS_BC_207649	V2LHS_131347	50.92	22.22	5243	ABCB1
OBS_BC_207651	V2LHS_84224	85.96	93.35	10892	MALT1
OBS_BC_207651	V2LHS_84224	72.2	91.01	10892	MALT1
OBS_BC_207654	V2LHS_154804	38.33	68.6	29015	SLC43A3
OBS_BC_207654	V2LHS_154804	30.18	59.67	29015	SLC43A3
OBS_BC_207661	V2LHS_190261	1.36	7.16	6940, 7551, 7556, 7559, 7561, 7568, 7581, 7582, 7586, 7587, 7675, 7678, 7694, 7705, 7712, 7754, 10781, 22835, 25850, 26149, 27300, 51276, 51710, 55552, 55888, 57232, 57474, 57573, 57677, 57786, 58492, 63934, 65243, 79673, 79862, 79973, 84307, 84503, 84622, 84775, 84924, 90075, 90589, 90592, 90594, 92283, 93474, 117608, 126069, 126070, 126231, 146198, 147741, 147923, 147949, 148254, 148266, 148268…	ZNF354A, ZNF3, ZNF10, ZNF12, ZNF14, ZNF20, ZNF33A, ZNF33B, ZKSCAN1, ZNF37A, ZNF121, ZNF124, ZNF135, ZNF146, ZNF157, ZNF204, ZNF266, ZFP30, ZNF345, ZNF658, ZNF544, ZNF571, ZNF44, ZNF823, ZNF167, ZNF630, ZNF490, ZNF471, ZFP14, RBAK, ZNF77, ZNF667, ZNF643, ZNF329, ZNF669, ZNF442, ZNF397, ZNF527, ZNF594, ZNF607, ZNF566, ZNF30, ZNF625, ZNF700, ZNF439, ZNF461, ZNF670, ZNF354B, ZNF491, ZNF440, ZNF573, Z…
OBS_BC_207661	V2LHS_190261	1.24	4.76	6940, 7551, 7556, 7559, 7561, 7568, 7581, 7582, 7586, 7587, 7675, 7678, 7694, 7705, 7712, 7754, 10781, 22835, 25850, 26149, 27300, 51276, 51710, 55552, 55888, 57232, 57474, 57573, 57677, 57786, 58492, 63934, 65243, 79673, 79862, 79973, 84307, 84503, 84622, 84775, 84924, 90075, 90589, 90592, 90594, 92283, 93474, 117608, 126069, 126070, 126231, 146198, 147741, 147923, 147949, 148254, 148266, 148268…	ZNF354A, ZNF3, ZNF10, ZNF12, ZNF14, ZNF20, ZNF33A, ZNF33B, ZKSCAN1, ZNF37A, ZNF121, ZNF124, ZNF135, ZNF146, ZNF157, ZNF204, ZNF266, ZFP30, ZNF345, ZNF658, ZNF544, ZNF571, ZNF44, ZNF823, ZNF167, ZNF630, ZNF490, ZNF471, ZFP14, RBAK, ZNF77, ZNF667, ZNF643, ZNF329, ZNF669, ZNF442, ZNF397, ZNF527, ZNF594, ZNF607, ZNF566, ZNF30, ZNF625, ZNF700, ZNF439, ZNF461, ZNF670, ZNF354B, ZNF491, ZNF440, ZNF573, Z…
OBS_BC_207663	V2LHS_76771	76.8	32.53	3973	LHCGR
OBS_BC_207666	V2LHS_151828	53.92	81.68	4317	MMP8
OBS_BC_207666	V2LHS_151828	49.87	61.8	4317	MMP8
OBS_BC_207668	V2LHS_46447	33.36	59.7	9056	SLC7A7
OBS_BC_207668	V2LHS_46447	30.97	55.78	9056	SLC7A7
OBS_BC_207670	V2LHS_87194	94.57	38.35	27348	TOR1B
OBS_BC_207670	V2LHS_87194	92.74	37.5	27348	TOR1B
OBS_BC_207672	V2LHS_131680	20.23	25.3	6169	RPL38
OBS_BC_207672	V2LHS_131680	14.6	25.09	6169	RPL38
OBS_BC_207677	V2LHS_252137	95.65	89.66	11282	MGAT4B
OBS_BC_207677	V2LHS_252137	95.48	85.33	11282	MGAT4B
OBS_BC_207678	V2LHS_114412	19.1	39.39	26122	EPC2
OBS_BC_207678	V2LHS_114412	14.95	27.96	26122	EPC2
OBS_BC_207679	V2LHS_198985	84.8	47.37	9200	PTPLA
OBS_BC_207679	V2LHS_198985	67.98	38.08	9200	PTPLA
OBS_BC_207681	V2LHS_259625	2.74	99.41	-	-
OBS_BC_207681	V2LHS_259625	2.38	99.23	-	-
OBS_BC_207688	V2LHS_16180	68.51	15.36	126272	EID2B
OBS_BC_207689	V2LHS_17147	32.52	25.22	8760	CDS2
OBS_BC_207689	V2LHS_17147	31.56	22.52	8760	CDS2
OBS_BC_207692	V2LHS_221592	56.99	32.32	10556	RPP30
OBS_BC_207697	V2LHS_96098	55.79	94.88	22865	SLITRK3
OBS_BC_207697	V2LHS_96098	52.08	76.7	22865	SLITRK3
OBS_BC_207702	V2LHS_131422	47.08	98.33	5530	PPP3CA
OBS_BC_207703	V2LHS_200840	53.31	32.25	23095	KIF1B
OBS_BC_207704	V2LHS_150655	29.99	32	1212	CLTB
OBS_BC_207704	V2LHS_150655	24.49	24.3	1212	CLTB
OBS_BC_207709	V2LHS_42244	43.43	29.55	2825	GPR1
OBS_BC_207709	V2LHS_42244	35.77	26.76	2825	GPR1
OBS_BC_207710	V2LHS_251382	49.96	9.19	57679	ALS2
OBS_BC_207711	V2LHS_94393	60.33	50.23	164	AP1G1
OBS_BC_207712	V2LHS_50081	42.89	85.02	155368	WBSCR27
OBS_BC_207713	V2LHS_98265	99.98	99.51	64750	SMURF2
OBS_BC_207713	V2LHS_98265	99.97	98.2	64750	SMURF2
OBS_BC_207716	V2LHS_170954	76.18	80.81	5786	PTPRA
OBS_BC_207716	V2LHS_170954	61.11	65.78	5786	PTPRA
OBS_BC_207719	V2LHS_285255	52.83	77.16	374875	HSD11B1L
OBS_BC_207719	V2LHS_285255	47.82	72.25	374875	HSD11B1L
OBS_BC_207722	V2LHS_94265	72.72	87.18	90	ACVR1
OBS_BC_207722	V2LHS_94265	42.46	75.05	90	ACVR1
OBS_BC_207724	V2LHS_203048	54.29	14.88	8874	ARHGEF7
OBS_BC_207724	V2LHS_203048	35.24	8.59	8874	ARHGEF7
OBS_BC_207727	V2LHS_71753	77.27	77.06	140707	BRI3BP
OBS_BC_207727	V2LHS_71753	65.2	72.63	140707	BRI3BP
OBS_BC_207728	V2LHS_184834	31.38	68.3	340120	ANKRD34B
OBS_BC_207728	V2LHS_184834	24.52	67.91	340120	ANKRD34B
OBS_BC_207729	V2LHS_262152	84.46	19.25	6908	TBP
OBS_BC_207729	V2LHS_262152	76.94	17.44	6908	TBP
OBS_BC_207731	V2LHS_20844	68.95	38.61	23417	MLYCD
OBS_BC_207731	V2LHS_20844	67.12	32.14	23417	MLYCD
OBS_BC_207732	V2LHS_243444	82.55	34.4	516	ATP5G1
OBS_BC_207732	V2LHS_243444	82.54	24.61	516	ATP5G1
OBS_BC_207733	V2LHS_135011	57.39	36.56	51286	CEND1
OBS_BC_207733	V2LHS_135011	55.41	25.62	51286	CEND1
OBS_BC_207734	V2LHS_33755	55.82	68.14	285753	C6orf182
OBS_BC_207734	V2LHS_33755	42.77	56.24	285753	C6orf182
OBS_BC_207737	V2LHS_261056	56.19	87.5	4292	MLH1
OBS_BC_207737	V2LHS_261056	49.42	79.92	4292	MLH1
OBS_BC_207741	V2LHS_30673	56.29	19.52	55507	GPRC5D
OBS_BC_207741	V2LHS_30673	44.15	11.95	55507	GPRC5D
OBS_BC_207744	V2LHS_77538	14.69	16.67	2766	GMPR
OBS_BC_207744	V2LHS_77538	13.07	13.39	2766	GMPR
OBS_BC_207747	V2LHS_48698	87.93	75.31	23318	ZCCHC11
OBS_BC_207748	V2LHS_176581	82.96	4.24	54606	DDX56
OBS_BC_207748	V2LHS_176581	59.11	2.12	54606	DDX56
OBS_BC_207754	V2LHS_95865	17.61	79.8	10412, 400061, 100130960	TINP1, LOC400061, LOC100130960
OBS_BC_207754	V2LHS_95865	15.76	60.18	10412, 400061, 100130960	TINP1, LOC400061, LOC100130960
OBS_BC_207755	V2LHS_179263	91.73	40.66	55827, 147040	IQWD1, KCTD11
OBS_BC_207759	V2LHS_56406	75.73	56.63	7444	VRK2
OBS_BC_207759	V2LHS_56406	73.51	50.33	7444	VRK2
OBS_BC_207762	V2LHS_94078	28.4	47.65	7153	TOP2A
OBS_BC_207762	V2LHS_94078	16.06	42.68	7153	TOP2A
OBS_BC_207763	V2LHS_173063	86.81	94.62	2259	FGF14
OBS_BC_207763	V2LHS_173063	69.65	93.82	2259	FGF14
OBS_BC_207765	V2LHS_199720	78.24	52.12	10488	CREB3
OBS_BC_207765	V2LHS_199720	51.38	24.24	10488	CREB3
OBS_BC_207766	V2LHS_195434	66.38	28.87	-	-
OBS_BC_207768	V2LHS_88885	94.26	83.43	959	CD40LG
OBS_BC_207768	V2LHS_88885	82.59	47.3	959	CD40LG
OBS_BC_207769	V2LHS_248015	60.37	45.22	93649	MYOCD
OBS_BC_207769	V2LHS_248015	55.38	24.13	93649	MYOCD
OBS_BC_207770	V2LHS_281999	6.21	3.76	8600	TNFSF11
OBS_BC_207770	V2LHS_281999	6.07	0.97	8600	TNFSF11
OBS_BC_207772	V2LHS_223044	53.47	94.72	7392	USF2
OBS_BC_207772	V2LHS_223044	41.46	79.96	7392	USF2
OBS_BC_207780	V2LHS_14234	49.37	88.69	22838	RNF44
OBS_BC_207780	V2LHS_14234	43.25	85.4	22838	RNF44
OBS_BC_207784	V2LHS_225306	19.29	29.76	217	ALDH2
OBS_BC_207784	V2LHS_225306	14.09	13.88	217	ALDH2
OBS_BC_207788	V2LHS_197693	89.91	91.59	10645	CAMKK2
OBS_BC_207788	V2LHS_197693	82.16	88.11	10645	CAMKK2
OBS_BC_207793	V2LHS_62376	83.58	12.87	4091	SMAD6
OBS_BC_207793	V2LHS_62376	73.26	12.16	4091	SMAD6
OBS_BC_207799	V2LHS_90079	26.24	31.08	2	A2M
OBS_BC_207799	V2LHS_90079	22.61	23.68	2	A2M
OBS_BC_207800	V2LHS_274884	47.02	52.32	3276	PRMT1
OBS_BC_207800	V2LHS_274884	39.48	36.73	3276	PRMT1
OBS_BC_207801	V2LHS_263147	83.27	39.92	22803	XRN2
OBS_BC_207801	V2LHS_263147	53.45	30.39	22803	XRN2
OBS_BC_207802	V2LHS_130922	62.61	73.48	2938, 2939	GSTA1, GSTA2
OBS_BC_207805	V2LHS_166095	60.52	81.25	346689	KLRG2
OBS_BC_207808	V2LHS_115313	49.77	50.38	51182	HSPA14
OBS_BC_207820	V2LHS_238995	56.76	67.82	8073	PTP4A2
OBS_BC_207821	V2LHS_211113	13.83	74.7	9379	NRXN2
OBS_BC_207821	V2LHS_211113	10.97	54.73	9379	NRXN2
OBS_BC_207822	V2LHS_68917	57.45	36.91	9935	MAFB
OBS_BC_207822	V2LHS_68917	48.03	32.85	9935	MAFB
OBS_BC_207825	V2LHS_219901	8.21	25.12	23332	CLASP1
OBS_BC_207825	V2LHS_219901	7.5	19.34	23332	CLASP1
OBS_BC_207826	V2LHS_175003	17.01	65.24	55298	RNF121
OBS_BC_207829	V2LHS_14665	60.67	21.69	81790	RNF170
OBS_BC_207829	V2LHS_14665	58.08	20.23	81790	RNF170
OBS_BC_207832	V2LHS_202089	36.66	50.52	1508	CTSB
OBS_BC_207832	V2LHS_202089	18.7	46.93	1508	CTSB
OBS_BC_207836	V2LHS_259891	75.98	39.73	590	BCHE
OBS_BC_207836	V2LHS_259891	65.62	36.09	590	BCHE
OBS_BC_207837	V2LHS_253359	88.06	52.23	11254	SLC6A14
OBS_BC_207839	V2LHS_58431	97.68	95.2	5303	PIN4
OBS_BC_207839	V2LHS_58431	97.17	94.71	5303	PIN4
OBS_BC_207840	V2LHS_211011	39.39	73.92	7402	UTRN
OBS_BC_207840	V2LHS_211011	34.42	47.76	7402	UTRN
OBS_BC_207844	V2LHS_97881	30.97	17.31	7223	TRPC4
OBS_BC_207849	V2LHS_62672	73.97	10.45	4001	LMNB1
OBS_BC_207850	V2LHS_150714	80.8	45.75	1282	COL4A1
OBS_BC_207853	V2LHS_152730	7.93	44.79	5128	PCTK2
OBS_BC_207853	V2LHS_152730	5.57	18.47	5128	PCTK2
OBS_BC_207856	V2LHS_70503	53.37	84.75	10328	COX4NB
OBS_BC_207856	V2LHS_70503	46.21	84.64	10328	COX4NB
OBS_BC_207857	V2LHS_87296	1.88	2.9	64224	HERPUD2
OBS_BC_207857	V2LHS_87296	0.95	2.24	64224	HERPUD2
OBS_BC_207858	V2LHS_42272	16.08	74.51	7156	TOP3A
OBS_BC_207858	V2LHS_42272	9.81	60.02	7156	TOP3A
OBS_BC_207861	V2LHS_262021	17.51	27.73	84085	FBXO30
OBS_BC_207862	V2LHS_27353	60.36	41.8	8548	BLZF1
OBS_BC_207862	V2LHS_27353	58.66	37.75	8548	BLZF1
OBS_BC_207863	V2LHS_193448	69.78	56.53	10772, 642558	FUSIP1, LOC642558
OBS_BC_207863	V2LHS_193448	53.32	31.42	10772, 642558	FUSIP1, LOC642558
OBS_BC_207870	V2LHS_72020	98.87	80.63	140689	CBLN4
OBS_BC_207870	V2LHS_72020	83.62	56.34	140689	CBLN4
OBS_BC_207871	V2LHS_156597	85.7	61.17	55254	TMEM39A
OBS_BC_207871	V2LHS_156597	53.91	48.74	55254	TMEM39A
OBS_BC_207872	V2LHS_114395	86.08	45.76	26115	TANC2
OBS_BC_207872	V2LHS_114395	82.92	44.32	26115	TANC2
OBS_BC_207874	V2LHS_62234	90.91	80.77	1004	CDH6
OBS_BC_207874	V2LHS_62234	87.37	75.98	1004	CDH6
OBS_BC_207879	V2LHS_283918	79	10.89	64940	STAG3L4
OBS_BC_207879	V2LHS_283918	75.86	9.31	64940	STAG3L4
OBS_BC_207882	V2LHS_59104	98.68	87.09	4116	MAGOH
OBS_BC_207882	V2LHS_59104	81.29	83.08	4116	MAGOH
OBS_BC_207891	V2LHS_43093	34.44	34.72	2139	EYA2
OBS_BC_207891	V2LHS_43093	20.86	32.48	2139	EYA2
OBS_BC_207894	V2LHS_169877	88.18	93.84	5203	PFDN4
OBS_BC_207894	V2LHS_169877	65.15	93.11	5203	PFDN4
OBS_BC_207897	V2LHS_77235	17.86	43.8	221300	BET3L
OBS_BC_207897	V2LHS_77235	16.17	38.6	221300	BET3L
OBS_BC_207898	V2LHS_204826	74.89	1.56	23064	SETX
OBS_BC_207898	V2LHS_204826	54.76	0.94	23064	SETX
OBS_BC_207904	V2LHS_221398	65.37	61.71	53373	TPCN1
OBS_BC_207904	V2LHS_221398	52.13	42.32	53373	TPCN1
OBS_BC_207906	V2LHS_171041	41.39	64.33	5803	PTPRZ1
OBS_BC_207906	V2LHS_171041	38.47	54.87	5803	PTPRZ1
OBS_BC_207909	V2LHS_220081	96.33	43.54	8309	ACOX2
OBS_BC_207910	V2LHS_237915	61.36	19.1	3843	IPO5
OBS_BC_207910	V2LHS_237915	47.34	11.08	3843	IPO5
OBS_BC_207914	V2LHS_44832	50.68	97.39	57000	C9orf31
OBS_BC_207914	V2LHS_44832	47	92.45	57000	C9orf31
OBS_BC_207919	V2LHS_169776	14.8	30.79	5151	PDE8A
OBS_BC_207919	V2LHS_169776	10.29	28.46	5151	PDE8A
OBS_BC_207926	V2LHS_93848	51.56	50.72	6229, 729684	RPS24, LOC729684
OBS_BC_207926	V2LHS_93848	11.31	42.17	6229, 729684	RPS24, LOC729684
OBS_BC_207927	V2LHS_270643	12.14	81.08	3849	KRT2
OBS_BC_207928	V2LHS_152827	55.95	97.29	6424	SFRP4
OBS_BC_207928	V2LHS_152827	55.14	83.63	6424	SFRP4
OBS_BC_207929	V2LHS_231711	31.41	55.43	9891	NUAK1
OBS_BC_207930	V2LHS_41431	80.07	67.22	8653, 100130220	DDX3Y, LOC100130220
OBS_BC_207930	V2LHS_41431	79.36	65.76	8653, 100130220	DDX3Y, LOC100130220
OBS_BC_207931	V2LHS_178562	99.74	5.01	1174	AP1S1
OBS_BC_207931	V2LHS_178562	99.36	4.71	1174	AP1S1
OBS_BC_207938	V2LHS_38683	14.35	68.54	57107	PDSS2
OBS_BC_207939	V2LHS_65519	27.98	17.88	51747	CROP
OBS_BC_207939	V2LHS_65519	25.93	14.15	51747	CROP
OBS_BC_207940	V2LHS_66982	82.78	67.97	8434	RECK
OBS_BC_207947	V2LHS_98943	83.94	44.19	79053	ALG8
OBS_BC_207947	V2LHS_98943	63.85	22.86	79053	ALG8
OBS_BC_207950	V2LHS_121717	36.82	49.18	285148	IAH1
OBS_BC_207950	V2LHS_121717	28.28	47.79	285148	IAH1
OBS_BC_207957	V2LHS_74989	29.69	96.04	117154	DACH2
OBS_BC_207958	V2LHS_153880	63.05	54.44	7008	TEF
OBS_BC_207958	V2LHS_153880	59	34.49	7008	TEF
OBS_BC_207959	V2LHS_188607	77.2	37.68	5268	SERPINB5
OBS_BC_207959	V2LHS_188607	68.33	11.86	5268	SERPINB5
OBS_BC_207963	V2LHS_32968	18.04	30.22	8417	STX7
OBS_BC_207963	V2LHS_32968	15.88	22.07	8417	STX7
OBS_BC_207965	V2LHS_48074	79.11	98.23	4726	NDUFS6
OBS_BC_207965	V2LHS_48074	65.99	95.67	4726	NDUFS6
OBS_BC_207967	V2LHS_117527	95.85	65.9	83732	RIOK1
OBS_BC_207967	V2LHS_117527	83.93	54.76	83732	RIOK1
OBS_BC_207968	V2LHS_42153	31.94	78.64	7433	VIPR1
OBS_BC_207968	V2LHS_42153	23.86	52.66	7433	VIPR1
OBS_BC_207973	V2LHS_132760	55.51	75.08	479	ATP12A
OBS_BC_207974	V2LHS_29332	9.98	81.81	113691	MGC16703
OBS_BC_207974	V2LHS_29332	6.85	80.38	113691	MGC16703
OBS_BC_207977	V2LHS_57526	97.12	13.86	57453	DSCAML1
OBS_BC_207977	V2LHS_57526	97.11	13.13	57453	DSCAML1
OBS_BC_207983	V2LHS_55791	76.14	92.72	9015	TAF1A
OBS_BC_207983	V2LHS_55791	61.34	74.4	9015	TAF1A
OBS_BC_207985	V2LHS_81295	68.04	43.86	64343	AZI2
OBS_BC_207985	V2LHS_81295	20.19	23.65	64343	AZI2
OBS_BC_207986	V2LHS_112634	85.4	73.89	701	BUB1B
OBS_BC_207986	V2LHS_112634	80.31	67.16	701	BUB1B
OBS_BC_207987	V2LHS_251840	83.89	64.84	2568	GABRP
OBS_BC_207987	V2LHS_251840	62.78	49.46	2568	GABRP
OBS_BC_207988	V2LHS_83942	8.79	5.52	2038	EPB42
OBS_BC_207988	V2LHS_83942	6.97	1.74	2038	EPB42
OBS_BC_207991	V2LHS_52425	68.08	81.38	56889	TM9SF3
OBS_BC_207993	V2LHS_250362	62.1	35.67	63876	PKNOX2
OBS_BC_207993	V2LHS_250362	60.22	29.03	63876	PKNOX2
OBS_BC_208000	V2LHS_199873	16.23	36.45	6615	SNAI1
OBS_BC_208000	V2LHS_199873	11.17	24.59	6615	SNAI1
OBS_BC_208005	V2LHS_89338	92.51	93.41	540	ATP7B
OBS_BC_208006	V2LHS_100198	19.05	21.17	133060, 388996	OTOP1, LOC388996
OBS_BC_208012	V2LHS_211386	29.73	69.19	25788, 100128414	RAD54B, LOC100128414
OBS_BC_208012	V2LHS_211386	18.86	35.67	25788, 100128414	RAD54B, LOC100128414
OBS_BC_208017	V2LHS_94071	77.8	83.86	7132	TNFRSF1A
OBS_BC_208017	V2LHS_94071	75.31	69.87	7132	TNFRSF1A
OBS_BC_208018	V2LHS_217466	54.03	66.73	26998	FETUB
OBS_BC_208018	V2LHS_217466	35.74	56.32	26998	FETUB
OBS_BC_208020	V2LHS_262685	79.95	81.31	1196, 1197	CLK2, CLK2P
OBS_BC_208020	V2LHS_262685	56.65	80.08	1196, 1197	CLK2, CLK2P
OBS_BC_208025	V2LHS_150211	21.88	76.43	819	CAMLG
OBS_BC_208032	V2LHS_16318	75.5	77.65	26297	SERGEF
OBS_BC_208032	V2LHS_16318	72.57	63.99	26297	SERGEF
OBS_BC_208037	V2LHS_170783	95.13	95.1	5705	PSMC5
OBS_BC_208037	V2LHS_170783	94.48	86.05	5705	PSMC5
OBS_BC_208038	V2LHS_149788	68.72	91.07	-	-
OBS_BC_208038	V2LHS_149788	37.69	60.8	-	-
OBS_BC_208040	V2LHS_229793	63.82	32.42	64795	RMND5A
OBS_BC_208040	V2LHS_229793	56.2	14.19	64795	RMND5A
OBS_BC_208041	V2LHS_262983	77.74	81.17	1477	CSTF1
OBS_BC_208041	V2LHS_262983	74.19	80.92	1477	CSTF1
OBS_BC_208043	V2LHS_41798	49.81	83.2	7867	MAPKAPK3
OBS_BC_208043	V2LHS_41798	46.87	79.57	7867	MAPKAPK3
OBS_BC_208047	V2LHS_249347	72.87	7.86	5866	RAB3IL1
OBS_BC_208047	V2LHS_249347	64.93	7.59	5866	RAB3IL1
OBS_BC_208050	V2LHS_170413	22.4	43.04	5568	PRKACG
OBS_BC_208050	V2LHS_170413	22.18	19.97	5568	PRKACG
OBS_BC_208071	V2LHS_131045	65.18	37.32	3362	HTR6
OBS_BC_208071	V2LHS_131045	61.28	24.33	3362	HTR6
OBS_BC_208074	V2LHS_35855	68.58	91.16	9313	MMP20
OBS_BC_208076	V2LHS_152002	83.29	74.29	4582	MUC1
OBS_BC_208076	V2LHS_152002	81.92	60.74	4582	MUC1
OBS_BC_208081	V2LHS_111373	66.84	73.01	151230	KLHL23
OBS_BC_208081	V2LHS_111373	64.87	66.55	151230	KLHL23
OBS_BC_208083	V2LHS_102318	70.53	17.17	1607	DGKB
OBS_BC_208084	V2LHS_70184	97.92	49.03	130560	SPATA3
OBS_BC_208085	V2LHS_246235	13.37	16.82	50650	ARHGEF3
OBS_BC_208086	V2LHS_251945	29.13	54.08	10202	DHRS2
OBS_BC_208086	V2LHS_251945	14.82	34.37	10202	DHRS2
OBS_BC_208087	V2LHS_118166	96.23	48.28	115201	ATG4A
OBS_BC_208097	V2LHS_202317	9.94	21.55	6095	RORA
OBS_BC_208097	V2LHS_202317	8.06	11.06	6095	RORA
OBS_BC_208103	V2LHS_132906	5.87	6.1	575	BAI1
OBS_BC_208103	V2LHS_132906	4.59	3.27	575	BAI1
OBS_BC_208104	V2LHS_76450	79.83	71.54	6383	SDC2
OBS_BC_208104	V2LHS_76450	77.61	63.36	6383	SDC2
OBS_BC_208106	V2LHS_66524	30.67	65.74	161436	EML5
OBS_BC_208106	V2LHS_66524	27.93	62.21	161436	EML5
OBS_BC_208108	V2LHS_50542	38.46	30.91	114990	VASN
OBS_BC_208108	V2LHS_50542	33.65	14.43	114990	VASN
OBS_BC_208115	V2LHS_172911	74.34	96.95	1690	COCH
OBS_BC_208115	V2LHS_172911	28.42	96.21	1690	COCH
OBS_BC_208123	V2LHS_76120	62.3	81.36	127124	ATP6V1G3
OBS_BC_208123	V2LHS_76120	37.39	80.36	127124	ATP6V1G3
OBS_BC_208128	V2LHS_163202	95.92	38.58	286148	DPY19L4
OBS_BC_208128	V2LHS_163202	90.87	35.28	286148	DPY19L4
OBS_BC_208129	V2LHS_52962	0.98	5.42	8869	ST3GAL5
OBS_BC_208129	V2LHS_52962	0.22	3.3	8869	ST3GAL5
OBS_BC_208130	V2LHS_115720	46.34	3.84	25764	HYPK
OBS_BC_208132	V2LHS_171933	19.17	63.4	7423	VEGFB
OBS_BC_208132	V2LHS_171933	15.7	47.15	7423	VEGFB
OBS_BC_208133	V2LHS_159883	37.39	89.96	86614, 159119	HSFY1, HSFY2
OBS_BC_208133	V2LHS_159883	28.99	76.26	86614, 159119	HSFY1, HSFY2
OBS_BC_208140	V2LHS_135015	79.48	82.36	51286	CEND1
OBS_BC_208140	V2LHS_135015	51	69.82	51286	CEND1
OBS_BC_208141	V2LHS_130916	86.27	88.65	2918	GRM8
OBS_BC_208141	V2LHS_130916	79.3	83.55	2918	GRM8
OBS_BC_208142	V2LHS_63694	27.28	55.82	3297, 642255	HSF1, LOC642255
OBS_BC_208148	V2LHS_60490	51.46	43.87	23049	SMG1
OBS_BC_208151	V2LHS_221958	6.18	89.6	286053	NSMCE2
OBS_BC_208151	V2LHS_221958	4.83	84.33	286053	NSMCE2
OBS_BC_208152	V2LHS_211647	56.46	69.96	11248	NXPH3
OBS_BC_208152	V2LHS_211647	47.94	62.99	11248	NXPH3
OBS_BC_208153	V2LHS_133532	5.27	16.51	3707	ITPKB
OBS_BC_208153	V2LHS_133532	4.6	16.18	3707	ITPKB
OBS_BC_208155	V2LHS_18611	82.38	94.95	161003	STOML3
OBS_BC_208155	V2LHS_18611	70.95	89.38	161003	STOML3
OBS_BC_208156	V2LHS_68452	70.07	58.83	9425	CDYL
OBS_BC_208160	V2LHS_117484	63.07	76.54	28981	IFT81
OBS_BC_208160	V2LHS_117484	56.25	56.33	28981	IFT81
OBS_BC_208166	V2LHS_179433	84.22	5.33	121391	KRT74
OBS_BC_208166	V2LHS_179433	77.22	3.65	121391	KRT74
OBS_BC_208169	V2LHS_97292	91.97	83.58	51639	SF3B14
OBS_BC_208169	V2LHS_97292	78.28	73.07	51639	SF3B14
OBS_BC_208172	V2LHS_85017	15.05	37.17	3199	HOXA2
OBS_BC_208172	V2LHS_85017	13.68	13.51	3199	HOXA2
OBS_BC_208173	V2LHS_264829	86.35	81.82	51350	KRT76
OBS_BC_208173	V2LHS_264829	83.42	76.66	51350	KRT76
OBS_BC_208180	V2LHS_154945	88.68	46.5	54796	BNC2
OBS_BC_208180	V2LHS_154945	88.37	45.96	54796	BNC2
OBS_BC_208182	V2LHS_235642	66.37	58.01	56	ACRV1
OBS_BC_208182	V2LHS_235642	65.51	57.76	56	ACRV1
OBS_BC_208184	V2LHS_134681	67.73	81.52	51088	KLHL5
OBS_BC_208192	V2LHS_233895	95.54	1.84	80145	THOC7
OBS_BC_208192	V2LHS_233895	87.17	0.4	80145	THOC7
OBS_BC_208194	V2LHS_36822	83.26	78.17	9162	DGKI
OBS_BC_208194	V2LHS_36822	80	70.21	9162	DGKI
OBS_BC_208197	V2LHS_201692	77.98	63.28	1788	DNMT3A
OBS_BC_208197	V2LHS_201692	59.67	58.41	1788	DNMT3A
OBS_BC_208198	V2LHS_82454	8.18	66.37	3155	HMGCL
OBS_BC_208198	V2LHS_82454	5.66	65.02	3155	HMGCL
OBS_BC_208202	V2LHS_25008	2.55	14.68	339366	ADAMTSL5
OBS_BC_208202	V2LHS_25008	2.33	7.03	339366	ADAMTSL5
OBS_BC_208205	V2LHS_112755	38.77	79.17	858	CAV2
OBS_BC_208205	V2LHS_112755	38.42	63.03	858	CAV2
OBS_BC_208210	V2LHS_155492	76.11	87.16	55120	FANCL
OBS_BC_208210	V2LHS_155492	34.82	58.72	55120	FANCL
OBS_BC_208211	V2LHS_245601	80.67	52.8	9058	SLC13A2
OBS_BC_208211	V2LHS_245601	52.3	43.97	9058	SLC13A2
OBS_BC_208213	V2LHS_150942	67.81	59.3	1414	CRYBB1
OBS_BC_208213	V2LHS_150942	55.06	55.79	1414	CRYBB1
OBS_BC_208214	V2LHS_131096	97.39	51.55	3567	IL5
OBS_BC_208214	V2LHS_131096	81.79	37.07	3567	IL5
OBS_BC_208215	V2LHS_238370	63.17	66.99	3418	IDH2
OBS_BC_208215	V2LHS_238370	50.78	62.58	3418	IDH2
OBS_BC_208217	V2LHS_238885	33.29	11.13	79370	BCL2L14
OBS_BC_208217	V2LHS_238885	29.45	6.32	79370	BCL2L14
OBS_BC_208221	V2LHS_285036	48.06	65.69	8406	SRPX
OBS_BC_208221	V2LHS_285036	43.22	44.66	8406	SRPX
OBS_BC_208228	V2LHS_214477	38.21	11.84	-	-
OBS_BC_208233	V2LHS_202001	74.9	96.2	3308	HSPA4
OBS_BC_208233	V2LHS_202001	55.04	92.71	3308	HSPA4
OBS_BC_208236	V2LHS_53231	99.17	97.92	8835	SOCS2
OBS_BC_208236	V2LHS_53231	96.11	97.39	8835	SOCS2
OBS_BC_208237	V2LHS_272798	92.09	88.18	84289, 727773	ING5, LOC727773
OBS_BC_208237	V2LHS_272798	90.09	86.28	84289, 727773	ING5, LOC727773
OBS_BC_208239	V2LHS_27964	96.83	77.66	8480	RAE1
OBS_BC_208239	V2LHS_27964	95.38	73.5	8480	RAE1
OBS_BC_208240	V2LHS_228137	75.57	82.15	1185	CLCN6
OBS_BC_208240	V2LHS_228137	70.19	80.58	1185	CLCN6
OBS_BC_208241	V2LHS_98024	89.69	2.23	51163	DBR1
OBS_BC_208241	V2LHS_98024	59.98	1.8	51163	DBR1
OBS_BC_208243	V2LHS_69806	15.16	82.96	90957	DHX57
OBS_BC_208243	V2LHS_69806	12.32	65.81	90957	DHX57
OBS_BC_208244	V2LHS_239738	45.1	27.13	146691	TOM1L2
OBS_BC_208247	V2LHS_203260	16.05	66.21	8555	CDC14B
OBS_BC_208247	V2LHS_203260	14.7	52.11	8555	CDC14B
OBS_BC_208249	V2LHS_97565	91.82	62.02	51126	NAT5
OBS_BC_208249	V2LHS_97565	88.97	24.8	51126	NAT5
OBS_BC_208250	V2LHS_19369	91.67	20.67	5613	PRKX
OBS_BC_208250	V2LHS_19369	91.26	19.96	5613	PRKX
OBS_BC_208253	V2LHS_206246	8.83	9.17	120114	FAT3
OBS_BC_208253	V2LHS_206246	6.78	2.27	120114	FAT3
OBS_BC_208260	V2LHS_137887	18.74	90.59	81855	SFXN3
OBS_BC_208263	V2LHS_58639	87.15	52.61	4796	NFKBIL2
OBS_BC_208263	V2LHS_58639	76.82	38.07	4796	NFKBIL2
OBS_BC_208276	V2LHS_89711	23.71	78.04	270	AMPD1
OBS_BC_208284	V2LHS_112013	20.28	26.21	185	AGTR1
OBS_BC_208284	V2LHS_112013	17.69	22.11	185	AGTR1
OBS_BC_208287	V2LHS_170159	37.44	50.27	5372	PMM1
OBS_BC_208287	V2LHS_170159	28.9	32.5	5372	PMM1
OBS_BC_208288	V2LHS_284641	28.37	80.84	440590	ZYG11A
OBS_BC_208291	V2LHS_239080	14.01	20.84	6095	RORA
OBS_BC_208294	V2LHS_36464	91.39	73.42	9197	SLC33A1
OBS_BC_208294	V2LHS_36464	82.44	73.14	9197	SLC33A1
OBS_BC_208295	V2LHS_96066	47.79	55.34	22858	ICK
OBS_BC_208295	V2LHS_96066	40.3	39.77	22858	ICK
OBS_BC_208296	V2LHS_134855	94.94	96.38	51761	ATP8A2
OBS_BC_208296	V2LHS_134855	85.78	92.51	51761	ATP8A2
OBS_BC_208308	V2LHS_191020	66.18	27.62	6134, 284393, 285176, 389342, 100129975	RPL10, LOC284393, LOC285176, LOC389342, LOC100129975
OBS_BC_208308	V2LHS_191020	48.09	24.74	6134, 284393, 285176, 389342, 100129975	RPL10, LOC284393, LOC285176, LOC389342, LOC100129975
OBS_BC_208314	V2LHS_131254	73.85	63.02	4887	NPY2R
OBS_BC_208314	V2LHS_131254	70.52	60.95	4887	NPY2R
OBS_BC_208315	V2LHS_104499	41.05	94.91	83849	SYT15
OBS_BC_208315	V2LHS_104499	22.89	84.74	83849	SYT15
OBS_BC_208320	V2LHS_18133	86.88	22.85	1942	EFNA1
OBS_BC_208320	V2LHS_18133	74.33	19.42	1942	EFNA1
OBS_BC_208322	V2LHS_243549	91.3	92.69	4783	NFIL3
OBS_BC_208322	V2LHS_243549	83.08	90.59	4783	NFIL3
OBS_BC_208327	V2LHS_29890	65.22	40.04	253430, 401730	IPMK, LOC401730
OBS_BC_208327	V2LHS_29890	58.57	32.5	253430, 401730	IPMK, LOC401730
OBS_BC_208328	V2LHS_112225	99.47	99.29	777	CACNA1E
OBS_BC_208328	V2LHS_112225	98.39	99.25	777	CACNA1E
OBS_BC_208331	V2LHS_136943	97.7	61.37	80162	ATHL1
OBS_BC_208331	V2LHS_136943	96.18	58.2	80162	ATHL1
OBS_BC_208332	V2LHS_92888	57.03	9.15	3273	HRG
OBS_BC_208338	V2LHS_151130	30.47	15.51	1642	DDB1
OBS_BC_208338	V2LHS_151130	15.77	11.32	1642	DDB1
OBS_BC_208340	V2LHS_231575	85.9	94.93	6323	SCN1A
OBS_BC_208342	V2LHS_238911	91.01	73.05	10018	BCL2L11
OBS_BC_208342	V2LHS_238911	81.1	62.62	10018	BCL2L11
OBS_BC_208347	V2LHS_153087	81.68	91.63	6582	SLC22A2
OBS_BC_208347	V2LHS_153087	75.29	89.7	6582	SLC22A2
OBS_BC_208348	V2LHS_103791	9.58	1.28	284759	SIRPB2
OBS_BC_208349	V2LHS_201880	10.87	46.77	5921	RASA1
OBS_BC_208349	V2LHS_201880	7.5	21.74	5921	RASA1
OBS_BC_208351	V2LHS_137508	80.6	96.76	80342	TRAF3IP3
OBS_BC_208351	V2LHS_137508	66.77	91.94	80342	TRAF3IP3
OBS_BC_208354	V2LHS_215032	83.74	85.15	4088	SMAD3
OBS_BC_208354	V2LHS_215032	78.86	77.63	4088	SMAD3
OBS_BC_208356	V2LHS_53303	92.9	98.92	29079	MED4
OBS_BC_208356	V2LHS_53303	90.72	98.83	29079	MED4
OBS_BC_208358	V2LHS_59243	90.92	42.52	50617	ATP6V0A4
OBS_BC_208360	V2LHS_94449	89.94	39.34	246	ALOX15
OBS_BC_208361	V2LHS_68893	58.55	70.12	5433	POLR2D
OBS_BC_208361	V2LHS_68893	34.16	48.63	5433	POLR2D
OBS_BC_208364	V2LHS_42657	56.35	33.07	6820	SULT2B1
OBS_BC_208364	V2LHS_42657	53.25	27.69	6820	SULT2B1
OBS_BC_208366	V2LHS_156250	96.17	91.33	55735	DNAJC11
OBS_BC_208366	V2LHS_156250	85.32	90.82	55735	DNAJC11
OBS_BC_208367	V2LHS_72239	67.18	52.44	8884	SLC5A6
OBS_BC_208367	V2LHS_72239	58.25	36.23	8884	SLC5A6
OBS_BC_208369	V2LHS_262801	98.78	74.82	1187	CLCNKA
OBS_BC_208369	V2LHS_262801	94.79	72.49	1187	CLCNKA
OBS_BC_208371	V2LHS_175033	78.9	49.86	55303	GIMAP4
OBS_BC_208372	V2LHS_151668	28.81	73.47	6520	SLC3A2
OBS_BC_208372	V2LHS_151668	21.22	35.07	6520	SLC3A2
OBS_BC_208373	V2LHS_97663	49.19	46.38	51132	RNF12
OBS_BC_208373	V2LHS_97663	34.06	40.89	51132	RNF12
OBS_BC_208377	V2LHS_201918	60.23	52.71	9585	MPHOSPH1
OBS_BC_208377	V2LHS_201918	39.51	40.75	9585	MPHOSPH1
OBS_BC_208378	V2LHS_89530	97.07	97.57	443	ASPA
OBS_BC_208378	V2LHS_89530	85.65	96.79	443	ASPA
OBS_BC_208382	V2LHS_60299	67.21	71.95	374955	SPATA21
OBS_BC_208382	V2LHS_60299	66.88	65.41	374955	SPATA21
OBS_BC_208383	V2LHS_172754	65.15	98.57	719	C3AR1
OBS_BC_208383	V2LHS_172754	40.89	96.65	719	C3AR1
[truncated: 11,196 more rows]

## Sheet: V1A003
Barcode ID	pGIPZ Oligo ID	CY5/CY3 rank% (Exp.1)	CY5/CY3 rank% (Exp.2)	Gene ID	Gene Symbol
OBS_BC_200032	V2LHS_226283	20.66	20.32	125	ADH1B
OBS_BC_200032	V2LHS_226283	17.76	9.45	125	ADH1B
OBS_BC_200134	V2LHS_202724	2.25	15.96	5150	PDE7A
OBS_BC_200134	V2LHS_202724	1.97	14.08	5150	PDE7A
OBS_BC_200312	V2LHS_43677	1.92	5.9	1475	CSTA
OBS_BC_200312	V2LHS_43677	1.51	0.99	1475	CSTA
OBS_BC_200347	V2LHS_130978	7.07	1.99	3156	HMGCR
OBS_BC_200347	V2LHS_130978	4.8	0.63	3156	HMGCR
OBS_BC_200677	V2LHS_139156	22.05	57.84	2177	FANCD2
OBS_BC_200677	V2LHS_139156	19.65	48.65	2177	FANCD2
OBS_BC_200739	V2LHS_130611	20.43	11.12	5925	RB1
OBS_BC_200739	V2LHS_130611	14.38	1.68	5925	RB1
OBS_BC_200864	V2LHS_134057	24.86	17.95	4040	LRP6
OBS_BC_200864	V2LHS_134057	22.51	7.26	4040	LRP6
OBS_BC_201013	V2LHS_202677	12.46	12.07	83737	ITCH
OBS_BC_201013	V2LHS_202677	10.12	4.33	83737	ITCH
OBS_BC_201397	V2LHS_179512	1.93	26.54	319100	TAAR6
OBS_BC_201397	V2LHS_179512	0.99	3.13	319100	TAAR6
OBS_BC_201650	V2LHS_171679	2.68	5.32	7292	TNFSF4
OBS_BC_201650	V2LHS_171679	1.78	4.58	7292	TNFSF4
OBS_BC_201655	V2LHS_47954	17.12	17.64	140771	SMCR5
OBS_BC_201655	V2LHS_47954	15.68	14.09	140771	SMCR5
OBS_BC_201785	V2LHS_38879	2.53	3.95	57101	TMEM16B
OBS_BC_201785	V2LHS_38879	0.7	0.51	57101	TMEM16B
OBS_BC_201834	V2LHS_97851	9.32	11.06	51684	SUFU
OBS_BC_201834	V2LHS_97851	8.19	5.19	51684	SUFU
OBS_BC_201965	V2LHS_141091	2.44	3.53	221035	REEP3
OBS_BC_201965	V2LHS_141091	0.69	0.87	221035	REEP3
OBS_BC_202129	V2LHS_232460	29.04	30.84	4214	MAP3K1
OBS_BC_202129	V2LHS_232460	25.94	13.7	4214	MAP3K1
OBS_BC_202264	V2LHS_175606	9.11	14.72	55364	IMPACT
OBS_BC_202264	V2LHS_175606	8	10.71	55364	IMPACT
OBS_BC_202279	V2LHS_135636	1.32	1.5	65979	PHACTR4
OBS_BC_202279	V2LHS_135636	0.05	0.39	65979	PHACTR4
OBS_BC_202314	V2LHS_48901	8.4	16.47	155051	CRYGN
OBS_BC_202314	V2LHS_48901	4.86	15.06	155051	CRYGN
OBS_BC_202338	V2LHS_133198	1.17	3.81	3294	HSD17B2
OBS_BC_202338	V2LHS_133198	0.39	1.63	3294	HSD17B2
OBS_BC_202464	V2LHS_114549	21.23	46.28	26164	GTPBP5
OBS_BC_202464	V2LHS_114549	15.33	43.81	26164	GTPBP5
OBS_BC_202640	V2LHS_178558	2.22	7.62	3850	KRT3
OBS_BC_203067	V2LHS_169811	8.95	15.77	5164	PDK2
OBS_BC_203067	V2LHS_169811	6.97	8.1	5164	PDK2
OBS_BC_203089	V2LHS_255250	1.42	2.71	3551	IKBKB
OBS_BC_203089	V2LHS_255250	0.38	1.64	3551	IKBKB
OBS_BC_203185	V2LHS_201717	13.67	14.02	26273	FBXO3
OBS_BC_203185	V2LHS_201717	10.35	4.29	26273	FBXO3
OBS_BC_203510	V2LHS_99386	75.71	47.46	83440	ADPGK
OBS_BC_203510	V2LHS_99386	73.08	39.57	83440	ADPGK
OBS_BC_203526	V2LHS_92470	9.4	13.99	6519	SLC3A1
OBS_BC_203526	V2LHS_92470	3.63	11.97	6519	SLC3A1
OBS_BC_203807	V2LHS_135472	3.26	2.21	5079	PAX5
OBS_BC_203942	V2LHS_102168	0.13	1.9	26160	IFT172
OBS_BC_203942	V2LHS_102168	0	0.96	26160	IFT172
OBS_BC_204160	V2LHS_171132	22.36	78.45	5864	RAB3A
OBS_BC_204160	V2LHS_171132	21.47	62.03	5864	RAB3A
OBS_BC_204174	V2LHS_15611	1.23	55.12	86	ACTL6A
OBS_BC_204174	V2LHS_15611	1.05	46.64	86	ACTL6A
OBS_BC_204268	V2LHS_175959	15.6	14.57	353189	SLCO4C1
OBS_BC_204326	V2LHS_98655	0.45	4.28	78989	COLEC11
OBS_BC_204549	V2LHS_222263	12.17	99.63	84899	TMTC4
OBS_BC_204549	V2LHS_222263	8.22	99.49	84899	TMTC4
OBS_BC_204614	V2LHS_39292	24.54	32.69	153396	TMEM161B
OBS_BC_204614	V2LHS_39292	17.82	26.23	153396	TMEM161B
OBS_BC_204720	V2LHS_213101	25.9	78.99	11153	FICD
OBS_BC_204720	V2LHS_213101	24.83	55.7	11153	FICD
OBS_BC_204801	V2LHS_45872	27.27	30.93	56955	MEPE
OBS_BC_204801	V2LHS_45872	24.91	23.25	56955	MEPE
OBS_BC_205081	V2LHS_220198	87.06	82.24	7384	UQCRC1
OBS_BC_205081	V2LHS_220198	80.78	79.11	7384	UQCRC1
OBS_BC_205105	V2LHS_117723	10.2	20.27	83990	BRIP1
OBS_BC_205105	V2LHS_117723	0.91	6.53	83990	BRIP1
OBS_BC_205116	V2LHS_49926	15	96.44	23530	NNT
OBS_BC_205116	V2LHS_49926	14.12	80.58	23530	NNT
OBS_BC_205251	V2LHS_195287	29.72	19.92	56062	KLHL4
OBS_BC_205251	V2LHS_195287	25.01	9.93	56062	KLHL4
OBS_BC_205254	V2LHS_44369	59.88	47.94	23520	ANP32C
OBS_BC_205254	V2LHS_44369	52.08	18.26	23520	ANP32C
OBS_BC_205631	V2LHS_136463	0.43	11.86	114883	OSBPL9
OBS_BC_205631	V2LHS_136463	0.32	0.41	114883	OSBPL9
OBS_BC_205968	V2LHS_95860	39.12	11.56	10393	ANAPC10
OBS_BC_205968	V2LHS_95860	38.83	8.99	10393	ANAPC10
OBS_BC_206011	V2LHS_173681	0.93	3.6	54893	MTMR10
OBS_BC_206011	V2LHS_173681	0.62	1.88	54893	MTMR10
OBS_BC_206795	V2LHS_202922	12.07	14.93	7518	XRCC4
OBS_BC_207125	V2LHS_201716	3.04	79.58	4214	MAP3K1
OBS_BC_207125	V2LHS_201716	0.99	63.07	4214	MAP3K1
OBS_BC_207311	V2LHS_236261	26.52	6.86	79595	SAP130
OBS_BC_207311	V2LHS_236261	25.3	5.1	79595	SAP130
OBS_BC_207458	V2LHS_133885	5.68	12.69	3912	LAMB1
OBS_BC_207552	V2LHS_98860	0.56	17.02	5583	PRKCH
OBS_BC_207552	V2LHS_98860	0.31	14.22	5583	PRKCH
OBS_BC_208049	V2LHS_131492	6.48	4.34	5732	PTGER2
OBS_BC_208049	V2LHS_131492	4.77	0.72	5732	PTGER2
OBS_BC_208090	V2LHS_98267	23.49	10.92	64750	SMURF2
OBS_BC_208090	V2LHS_98267	21.75	9.97	64750	SMURF2
OBS_BC_208188	V2LHS_180192	30.71	13.9	125150	ZSWIM7
OBS_BC_208188	V2LHS_180192	25.87	9.83	125150	ZSWIM7
OBS_BC_208269	V2LHS_170467	11.48	2.8	5587	PRKD1
OBS_BC_208269	V2LHS_170467	0.47	2.77	5587	PRKD1
OBS_BC_208408	V2LHS_39279	1.47	49.28	57089	ENTPD7
OBS_BC_208408	V2LHS_39279	0.5	44.16	57089	ENTPD7
OBS_BC_208528	V2LHS_234903	5.08	2.52	79612	NARG1L
OBS_BC_208528	V2LHS_234903	3.15	1.83	79612	NARG1L
OBS_BC_208595	V2LHS_171103	16.11	2.56	5833	PCYT2
OBS_BC_208723	V2LHS_171884	3.08	2.62	7398	USP1
OBS_BC_209068	V2LHS_46795	50.99	55.73	9039	UBA3
OBS_BC_209068	V2LHS_46795	48.01	47.8	9039	UBA3
OBS_BC_209074	V2LHS_69283	30.58	99.39	9182	RASSF9
OBS_BC_209078	V2LHS_117745	69.92	80.62	84002	B3GNT5
OBS_BC_209078	V2LHS_117745	67.24	75.33	84002	B3GNT5
OBS_BC_209080	V2LHS_247827	47.34	29.23	10021	HCN4
OBS_BC_209082	V2LHS_48064	86.87	59.85	90121	TSR2
OBS_BC_209082	V2LHS_48064	81.92	48.44	90121	TSR2
OBS_BC_209087	V2LHS_165696	42.98	70.26	346389	7A5
OBS_BC_209087	V2LHS_165696	42.41	55.02	346389	7A5
OBS_BC_209089	V2LHS_130828	14.08	16.39	2897	GRIK1
OBS_BC_209089	V2LHS_130828	13.64	12.19	2897	GRIK1
OBS_BC_209103	V2LHS_85243	77.16	44.56	25932	CLIC4
OBS_BC_209105	V2LHS_165312	27.71	20.81	401138	AMTN
OBS_BC_209105	V2LHS_165312	26.26	11.06	401138	AMTN
OBS_BC_209106	V2LHS_93040	73.75	15.05	5122	PCSK1
OBS_BC_209106	V2LHS_93040	70.6	8.85	5122	PCSK1
OBS_BC_209107	V2LHS_279316	95.36	74.48	6585	SLIT1
OBS_BC_209107	V2LHS_279316	95.25	62.4	6585	SLIT1
OBS_BC_209109	V2LHS_64201	50.73	24	129831	RBM45
OBS_BC_209110	V2LHS_95318	78.24	94.57	9815	GIT2
OBS_BC_209110	V2LHS_95318	76.78	76.73	9815	GIT2
OBS_BC_209117	V2LHS_174938	92.28	99.93	55288	RHOT1
OBS_BC_209117	V2LHS_174938	91.63	99.86	55288	RHOT1
OBS_BC_209119	V2LHS_251494	37.34	70.72	9506	PAGE4
OBS_BC_209120	V2LHS_33877	16.03	36.8	7166	TPH1
OBS_BC_209120	V2LHS_33877	15.57	11.66	7166	TPH1
OBS_BC_209130	V2LHS_215746	98.41	40.97	64132	XYLT2
OBS_BC_209130	V2LHS_215746	98.1	31.87	64132	XYLT2
OBS_BC_209131	V2LHS_155987	69.45	47.97	55180	LINS1
OBS_BC_209131	V2LHS_155987	66.27	31.63	55180	LINS1
OBS_BC_209133	V2LHS_134241	5.89	0.16	51365	PLA1A
OBS_BC_209133	V2LHS_134241	4.23	0.06	51365	PLA1A
OBS_BC_209138	V2LHS_92161	56.99	29.16	-	-
OBS_BC_209151	V2LHS_248918	1.57	6.16	4323	MMP14
OBS_BC_209153	V2LHS_177837	13.73	2.35	84932	RAB2B
OBS_BC_209153	V2LHS_177837	7.76	0.99	84932	RAB2B
OBS_BC_209155	V2LHS_62821	24.3	20.78	150165	XKR3
OBS_BC_209155	V2LHS_62821	20.07	10.73	150165	XKR3
OBS_BC_209166	V2LHS_51538	69	65.95	444	ASPH
OBS_BC_209166	V2LHS_51538	66.25	63.76	444	ASPH
OBS_BC_209169	V2LHS_75457	9.38	84.47	5265	SERPINA1
OBS_BC_209169	V2LHS_75457	8.97	81.03	5265	SERPINA1
OBS_BC_209176	V2LHS_117977	12.54	86.76	84102	SLC41A2
OBS_BC_209176	V2LHS_117977	12.42	83.99	84102	SLC41A2
OBS_BC_209179	V2LHS_191792	8.63	54.43	-	-
OBS_BC_209179	V2LHS_191792	8.48	36.09	-	-
OBS_BC_209181	V2LHS_59424	64.65	59.76	3992	FADS1
OBS_BC_209181	V2LHS_59424	63.49	45.53	3992	FADS1
OBS_BC_209187	V2LHS_234727	30.85	97.88	23120	ATP10B
OBS_BC_209187	V2LHS_234727	27.24	96.06	23120	ATP10B
OBS_BC_209188	V2LHS_171445	30.39	63.73	7136	TNNI2
OBS_BC_209188	V2LHS_171445	26.09	48.36	7136	TNNI2
OBS_BC_209191	V2LHS_238641	10.62	70.76	231	AKR1B1
OBS_BC_209198	V2LHS_212384	80.49	76.31	163688	CALML6
OBS_BC_209198	V2LHS_212384	77.46	75.87	163688	CALML6
OBS_BC_209199	V2LHS_139604	26.43	18.93	54507	ADAMTSL4
OBS_BC_209199	V2LHS_139604	25.67	17.37	54507	ADAMTSL4
OBS_BC_209202	V2LHS_41283	54.93	66.25	57452, 100134404	GALNTL1, LOC100134404
OBS_BC_209202	V2LHS_41283	49.76	51.42	57452, 100134404	GALNTL1, LOC100134404
OBS_BC_209220	V2LHS_284946	63.13	50.06	3078, 3080	CFHR1, CFHR2
OBS_BC_209220	V2LHS_284946	62.18	35.94	3078, 3080	CFHR1, CFHR2
OBS_BC_209222	V2LHS_277583	10	81.13	125150	ZSWIM7
OBS_BC_209222	V2LHS_277583	8.9	80.11	125150	ZSWIM7
OBS_BC_209231	V2LHS_63207	45.21	40.03	337880	KRTAP11-1
OBS_BC_209233	V2LHS_201263	94.59	48.95	8969	HIST1H2AG
OBS_BC_209233	V2LHS_201263	93.68	30.98	8969	HIST1H2AG
OBS_BC_209241	V2LHS_194097	79.68	53.5	85286, 85287, 100132386	KRTAP4-9, KRTAP4-7, LOC100132386
OBS_BC_209241	V2LHS_194097	78.54	46.69	85286, 85287, 100132386	KRTAP4-9, KRTAP4-7, LOC100132386
OBS_BC_209249	V2LHS_210091	72.27	33.22	23125	CAMTA2
OBS_BC_209249	V2LHS_210091	69.5	25.02	23125	CAMTA2
OBS_BC_209252	V2LHS_115850	35.26	57.5	26499	PLEK2
OBS_BC_209252	V2LHS_115850	32.13	40.65	26499	PLEK2
OBS_BC_209258	V2LHS_17391	45.4	75.57	8735	MYH13
OBS_BC_209258	V2LHS_17391	45.22	61.83	8735	MYH13
OBS_BC_209271	V2LHS_216190	33.66	85.47	149830	PRNT
OBS_BC_209271	V2LHS_216190	31.56	80.87	149830	PRNT
OBS_BC_209273	V2LHS_84286	66.87	77.56	1476	CSTB
OBS_BC_209273	V2LHS_84286	60.82	59.61	1476	CSTB
OBS_BC_209280	V2LHS_133282	2.56	11.87	3445	IFNA8
OBS_BC_209280	V2LHS_133282	2.12	2.68	3445	IFNA8
OBS_BC_209282	V2LHS_222445	92.05	38.72	285755	PPIL6
OBS_BC_209282	V2LHS_222445	91.66	37.14	285755	PPIL6
OBS_BC_209286	V2LHS_234377	5.61	9.26	2665	GDI2
OBS_BC_209289	V2LHS_138694	94.36	63.24	84312	BRMS1L
OBS_BC_209292	V2LHS_28750	39.13	26.95	9131	AIFM1
OBS_BC_209292	V2LHS_28750	32.83	20.84	9131	AIFM1
OBS_BC_209301	V2LHS_203599	15.4	13.32	10615	SPAG5
OBS_BC_209302	V2LHS_139065	63.2	18.76	53336	CPXCR1
OBS_BC_209302	V2LHS_139065	56.35	16.78	53336	CPXCR1
OBS_BC_209306	V2LHS_285101	92.99	69.35	408263	C5orf40
OBS_BC_209307	V2LHS_113832	70.71	36.76	2247	FGF2
OBS_BC_209307	V2LHS_113832	67.05	18.54	2247	FGF2
OBS_BC_209315	V2LHS_96674	7.87	8.3	25942	SIN3A
OBS_BC_209315	V2LHS_96674	1.2	5.47	25942	SIN3A
OBS_BC_209317	V2LHS_39455	93.74	23.35	129303	TMEM150
OBS_BC_209317	V2LHS_39455	91.51	21.61	129303	TMEM150
OBS_BC_209321	V2LHS_34364	84.7	72.84	25791	NGEF
OBS_BC_209321	V2LHS_34364	71.02	65.33	25791	NGEF
OBS_BC_209324	V2LHS_75799	42.34	97.46	4948	OCA2
OBS_BC_209324	V2LHS_75799	37.95	97.31	4948	OCA2
OBS_BC_209332	V2LHS_85077	95.38	91.22	2218	FKTN
OBS_BC_209332	V2LHS_85077	94.82	88.94	2218	FKTN
OBS_BC_209334	V2LHS_219592	84.43	93.35	7528	YY1
OBS_BC_209334	V2LHS_219592	79.23	89.53	7528	YY1
OBS_BC_209337	V2LHS_171265	12.87	90.68	5919	RARRES2
OBS_BC_209337	V2LHS_171265	12.28	81.41	5919	RARRES2
OBS_BC_209341	V2LHS_178077	45.07	44.48	84976	DISP1
OBS_BC_209341	V2LHS_178077	39.83	30.91	84976	DISP1
OBS_BC_209342	V2LHS_116016	8.21	6.32	51247	PAIP2
OBS_BC_209342	V2LHS_116016	6.56	5.22	51247	PAIP2
OBS_BC_209344	V2LHS_11724	77.78	52.17	66008	TRAK2
OBS_BC_209344	V2LHS_11724	77.71	51.03	66008	TRAK2
OBS_BC_209357	V2LHS_69103	58.63	97.01	116071	BATF2
OBS_BC_209357	V2LHS_69103	48.6	93.26	116071	BATF2
OBS_BC_209362	V2LHS_170570	18.84	71.54	5620	PRM2
OBS_BC_209362	V2LHS_170570	16.97	64.31	5620	PRM2
OBS_BC_209373	V2LHS_71333	73.07	59.6	29110	TBK1
OBS_BC_209378	V2LHS_223307	61.06	8.59	55656	INTS8
OBS_BC_209382	V2LHS_57775	29.97	20.57	57419	SLC24A3
OBS_BC_209382	V2LHS_57775	24.1	15.99	57419	SLC24A3
OBS_BC_209384	V2LHS_17831	6.71	7.5	9211	LGI1
OBS_BC_209384	V2LHS_17831	6.69	3.9	9211	LGI1
OBS_BC_209394	V2LHS_37166	32.55	64.69	9133	CCNB2
OBS_BC_209394	V2LHS_37166	31.53	53.25	9133	CCNB2
OBS_BC_209399	V2LHS_80157	15.87	46.94	9287	TAAR2
OBS_BC_209399	V2LHS_80157	15.36	44.57	9287	TAAR2
OBS_BC_209401	V2LHS_158439	20.12	53.7	80724	ACAD10
OBS_BC_209401	V2LHS_158439	19.49	53.1	80724	ACAD10
OBS_BC_209402	V2LHS_235059	93.38	20.07	4045	LSAMP
OBS_BC_209402	V2LHS_235059	92.65	17.28	4045	LSAMP
OBS_BC_209413	V2LHS_284831	84.44	99.96	6967, 6983, 445347	TRGC2, TRGV9, TARP
OBS_BC_209413	V2LHS_284831	79.69	99.75	6967, 6983, 445347	TRGC2, TRGV9, TARP
OBS_BC_209417	V2LHS_61553	92.61	81.02	11340	EXOSC8
OBS_BC_209417	V2LHS_61553	92.11	68.32	11340	EXOSC8
OBS_BC_209418	V2LHS_174569	88.61	80.68	55670	PEX26
OBS_BC_209420	V2LHS_137618	32.09	46.88	81605	URM1
OBS_BC_209420	V2LHS_137618	25.25	44.52	81605	URM1
OBS_BC_209422	V2LHS_83560	46.79	45.51	65108	MARCKSL1
OBS_BC_209422	V2LHS_83560	44.21	44.26	65108	MARCKSL1
OBS_BC_209423	V2LHS_104881	18.53	29.68	805	CALM2
OBS_BC_209423	V2LHS_104881	18.01	24.54	805	CALM2
OBS_BC_209425	V2LHS_174280	98.35	22.67	54979	HRASLS2
OBS_BC_209425	V2LHS_174280	97.26	17.63	54979	HRASLS2
OBS_BC_209430	V2LHS_97848	86.53	91.34	51406	NOL7
OBS_BC_209442	V2LHS_199104	79.62	87.22	4090	SMAD5
OBS_BC_209442	V2LHS_199104	75.35	87.16	4090	SMAD5
OBS_BC_209443	V2LHS_33347	40.02	98.71	317701	VN1R2
OBS_BC_209443	V2LHS_33347	31.86	97.67	317701	VN1R2
OBS_BC_209444	V2LHS_115613	80.15	35.64	51208	CLDN18
OBS_BC_209444	V2LHS_115613	79.21	32.09	51208	CLDN18
OBS_BC_209452	V2LHS_48801	79.37	37.25	466	ATF1
OBS_BC_209452	V2LHS_48801	78.01	31.64	466	ATF1
OBS_BC_209453	V2LHS_239259	35.84	46	6096	RORB
OBS_BC_209454	V2LHS_250651	56.44	30.21	283150	FOXR1
OBS_BC_209454	V2LHS_250651	56.32	28.8	283150	FOXR1
OBS_BC_209463	V2LHS_18936	24.75	11.41	149111	CNIH3
OBS_BC_209470	V2LHS_231498	77.41	55.82	80760	ITIH5
OBS_BC_209470	V2LHS_231498	72.02	46.38	80760	ITIH5
OBS_BC_209478	V2LHS_218946	38.88	82.3	54873	PALMD
OBS_BC_209478	V2LHS_218946	31.31	65.6	54873	PALMD
OBS_BC_209481	V2LHS_50174	52.49	25.79	23554	TSPAN12
OBS_BC_209481	V2LHS_50174	46.24	21.08	23554	TSPAN12
OBS_BC_209485	V2LHS_262979	38.51	85.06	1027	CDKN1B
OBS_BC_209485	V2LHS_262979	37.07	79.81	1027	CDKN1B
OBS_BC_209487	V2LHS_286878	67.08	76.46	2635	GBP3
OBS_BC_209487	V2LHS_286878	61.54	54.36	2635	GBP3
OBS_BC_209498	V2LHS_262350	47.35	30.12	7979	SHFM1
OBS_BC_209500	V2LHS_61273	71.92	90.87	1649, 4141	DDIT3, MARS
OBS_BC_209505	V2LHS_20793	88.18	74.84	10724	MGEA5
OBS_BC_209505	V2LHS_20793	84.77	57.09	10724	MGEA5
OBS_BC_209515	V2LHS_42692	36.98	91.91	6780	STAU1
OBS_BC_209516	V2LHS_71756	56.98	89.35	140707	BRI3BP
OBS_BC_209516	V2LHS_71756	53.23	78.69	140707	BRI3BP
OBS_BC_209521	V2LHS_242141	16.24	23.47	221223	CES7
OBS_BC_209522	V2LHS_133363	71.9	66.27	3624	INHBA
OBS_BC_209522	V2LHS_133363	66.17	46.44	3624	INHBA
OBS_BC_209525	V2LHS_94152	52.3	42.83	13	AADAC
OBS_BC_209525	V2LHS_94152	44.22	39.38	13	AADAC
OBS_BC_209528	V2LHS_239602	75.33	68.08	5465	PPARA
OBS_BC_209528	V2LHS_239602	72.85	59.2	5465	PPARA
OBS_BC_209531	V2LHS_171640	8.36	4.62	7275	TUB
OBS_BC_209531	V2LHS_171640	7.47	2.41	7275	TUB
OBS_BC_209534	V2LHS_201702	53.4	85.34	10564	ARFGEF2
OBS_BC_209534	V2LHS_201702	47.73	72.46	10564	ARFGEF2
OBS_BC_209535	V2LHS_173316	55.01	55.25	6358, 6359	CCL14, CCL15
OBS_BC_209537	V2LHS_285167	39.77	63.1	50506	DUOX2
OBS_BC_209547	V2LHS_285494	13.13	74.09	404744	AAA1
OBS_BC_209547	V2LHS_285494	12.81	61.68	404744	AAA1
OBS_BC_209555	V2LHS_133348	80.83	56.95	3601	IL15RA
OBS_BC_209555	V2LHS_133348	79.7	44.5	3601	IL15RA
OBS_BC_209561	V2LHS_96644	95.16	44.93	25934	NIPSNAP3A
OBS_BC_209566	V2LHS_221355	2.6	2.18	5266	PI3
OBS_BC_209566	V2LHS_221355	2.26	0.4	5266	PI3
OBS_BC_209567	V2LHS_154064	11.54	57.36	7074	TIAM1
OBS_BC_209567	V2LHS_154064	11.47	41.05	7074	TIAM1
OBS_BC_209580	V2LHS_233850	5.45	14.56	4988	OPRM1
OBS_BC_209580	V2LHS_233850	4.79	9.26	4988	OPRM1
OBS_BC_209581	V2LHS_131232	51.98	16.48	4881	NPR1
OBS_BC_209581	V2LHS_131232	51.02	13.77	4881	NPR1
OBS_BC_209606	V2LHS_239154	42.58	79.77	8780	RIOK3
OBS_BC_209606	V2LHS_239154	39.1	72.07	8780	RIOK3
OBS_BC_209608	V2LHS_55805	25.71	78.28	9289	GPR56
OBS_BC_209608	V2LHS_55805	23.5	75.64	9289	GPR56
OBS_BC_209612	V2LHS_46879	79.36	70.27	9021	SOCS3
OBS_BC_209612	V2LHS_46879	77.87	66.35	9021	SOCS3
OBS_BC_209619	V2LHS_100240	7.25	7.09	219623	TMEM26
OBS_BC_209619	V2LHS_100240	6.03	3.94	219623	TMEM26
OBS_BC_209620	V2LHS_243773	24.78	57.9	128869	PIGU
OBS_BC_209633	V2LHS_77405	40.87	25.34	3347	HTN3
OBS_BC_209633	V2LHS_77405	38.52	23.09	3347	HTN3
OBS_BC_209634	V2LHS_111965	58.07	60.36	140	ADORA3
OBS_BC_209634	V2LHS_111965	50.11	58.96	140	ADORA3
OBS_BC_209638	V2LHS_238859	50.48	89.83	104	ADARB1
OBS_BC_209638	V2LHS_238859	50.06	81.97	104	ADARB1
OBS_BC_209644	V2LHS_56988	45.68	56.8	6354	CCL7
OBS_BC_209644	V2LHS_56988	42.6	46.49	6354	CCL7
OBS_BC_209648	V2LHS_82950	2.44	12.04	2705	GJB1
OBS_BC_209648	V2LHS_82950	1.61	11.2	2705	GJB1
OBS_BC_209649	V2LHS_20959	59.23	89.21	143282	FGFBP3
OBS_BC_209649	V2LHS_20959	52.39	78.08	143282	FGFBP3
OBS_BC_209654	V2LHS_202566	8.26	4.98	7468	WHSC1
OBS_BC_209654	V2LHS_202566	3.27	2.68	7468	WHSC1
OBS_BC_209660	V2LHS_134575	18.5	25.28	26191	PTPN22
OBS_BC_209661	V2LHS_113050	52.9	95.58	1176, 643454, 647349	AP3S1, LOC643454, LOC647349
OBS_BC_209661	V2LHS_113050	48.66	84.72	1176, 643454, 647349	AP3S1, LOC643454, LOC647349
OBS_BC_209663	V2LHS_41243	92.1	83.19	9082, 353515	XKRY, XKRY2
OBS_BC_209663	V2LHS_41243	91.71	67.61	9082, 353515	XKRY, XKRY2
OBS_BC_209674	V2LHS_219087	17.3	37.87	7352	UCP3
OBS_BC_209698	V2LHS_158596	38.85	26.17	64902	AGXT2
OBS_BC_209698	V2LHS_158596	36.76	17.22	64902	AGXT2
OBS_BC_209714	V2LHS_159050	39.08	75.13	84532	ACSS1
OBS_BC_209714	V2LHS_159050	38.15	69.49	84532	ACSS1
OBS_BC_209718	V2LHS_210320	55.16	91.88	58525	WIZ
OBS_BC_209718	V2LHS_210320	53.51	84.98	58525	WIZ
OBS_BC_209720	V2LHS_93838	87.47	28.07	6228	RPS23
OBS_BC_209720	V2LHS_93838	86.67	16.93	6228	RPS23
OBS_BC_209722	V2LHS_171887	16.64	40.29	7398	USP1
OBS_BC_209722	V2LHS_171887	15.98	36	7398	USP1
OBS_BC_209724	V2LHS_176316	64.48	31.71	54498	SMOX
OBS_BC_209724	V2LHS_176316	64.3	27.13	54498	SMOX
OBS_BC_209729	V2LHS_16886	54.12	69.27	5723, 8781, 100133481	PSPH, PSPHL, LOC100133481
OBS_BC_209729	V2LHS_16886	50.07	63.66	5723, 8781, 100133481	PSPH, PSPHL, LOC100133481
OBS_BC_209732	V2LHS_64327	50.3	67.77	586	BCAT1
OBS_BC_209734	V2LHS_151012	93.08	25.1	1491	CTH
OBS_BC_209734	V2LHS_151012	92.66	20.61	1491	CTH
OBS_BC_209737	V2LHS_222920	88.81	85.25	726	CAPN5
OBS_BC_209737	V2LHS_222920	87.87	84.95	726	CAPN5
OBS_BC_209738	V2LHS_48705	76.03	93.3	3785	KCNQ2
OBS_BC_209743	V2LHS_238149	1.82	86.94	125931	CEACAM20
OBS_BC_209743	V2LHS_238149	1.63	72.1	125931	CEACAM20
OBS_BC_209746	V2LHS_103792	99.84	87.68	284759	SIRPB2
OBS_BC_209757	V2LHS_153806	6.26	16.86	6500	SKP1
OBS_BC_209757	V2LHS_153806	5.2	9.82	6500	SKP1
OBS_BC_209763	V2LHS_168063	89.53	89.8	286223	C9orf47
OBS_BC_209763	V2LHS_168063	88.39	89.65	286223	C9orf47
OBS_BC_209765	V2LHS_171686	90.61	88.58	7294	TXK
OBS_BC_209766	V2LHS_267189	6.44	6.83	5332	PLCB4
OBS_BC_209773	V2LHS_171974	31.72	80.14	7447	VSNL1
OBS_BC_209783	V2LHS_93630	98.83	99.75	7252	TSHB
OBS_BC_209783	V2LHS_93630	98.81	99.72	7252	TSHB
OBS_BC_209785	V2LHS_246844	11.38	15.34	390502	SERPINA2
OBS_BC_209785	V2LHS_246844	9.02	13.67	390502	SERPINA2
OBS_BC_209787	V2LHS_83995	55.08	94.79	10939	AFG3L2
OBS_BC_209790	V2LHS_64684	57.61	92.55	3927	LASP1
OBS_BC_209796	V2LHS_134038	41.7	55.46	4035	LRP1
OBS_BC_209796	V2LHS_134038	36.79	44.74	4035	LRP1
OBS_BC_209799	V2LHS_48577	38.45	70.11	648	BMI1
OBS_BC_209803	V2LHS_58768	94.62	42.52	93426	SYCE1
OBS_BC_209803	V2LHS_58768	93.71	34.94	93426	SYCE1
OBS_BC_209805	V2LHS_236832	98.74	42.55	3035	HARS
OBS_BC_209805	V2LHS_236832	98.62	39.59	3035	HARS
OBS_BC_209808	V2LHS_43473	44.29	88.35	5768, 200058	QSOX1, FLJ23867
OBS_BC_209816	V2LHS_234326	19.75	39.28	55076	TMEM45A
OBS_BC_209816	V2LHS_234326	18.68	25.44	55076	TMEM45A
OBS_BC_209818	V2LHS_66645	57.42	27.94	5524	PPP2R4
OBS_BC_209818	V2LHS_66645	55.72	26.2	5524	PPP2R4
OBS_BC_209819	V2LHS_222053	16.81	41.53	55454	CSGALNACT2
OBS_BC_209819	V2LHS_222053	14.35	38.55	55454	CSGALNACT2
OBS_BC_209821	V2LHS_250172	10.8	11.6	10239	AP3S2
OBS_BC_209821	V2LHS_250172	9.62	11.45	10239	AP3S2
OBS_BC_209825	V2LHS_198154	83.85	97.93	23788	MTCH2
OBS_BC_209839	V2LHS_72589	53.15	85.39	9783	RIMS3
OBS_BC_209839	V2LHS_72589	53.06	79.96	9783	RIMS3
OBS_BC_209843	V2LHS_175507	50.77	29.89	55811	ADCY10
OBS_BC_209843	V2LHS_175507	46.85	26.66	55811	ADCY10
OBS_BC_209844	V2LHS_158262	11.82	30.36	79930	DOK3
OBS_BC_209844	V2LHS_158262	10.94	18.84	79930	DOK3
OBS_BC_209845	V2LHS_113567	22.65	22.79	1826	DSCAM
OBS_BC_209845	V2LHS_113567	21.42	19.89	1826	DSCAM
OBS_BC_209849	V2LHS_99003	17.99	21.79	79072	FASTKD3
OBS_BC_209849	V2LHS_99003	15.78	7.19	79072	FASTKD3
OBS_BC_209851	V2LHS_153344	50.34	54.08	6659	SOX4
OBS_BC_209851	V2LHS_153344	37.69	35.92	6659	SOX4
OBS_BC_209858	V2LHS_71511	53.27	45.22	9240	PNMA1
OBS_BC_209858	V2LHS_71511	52.18	39.61	9240	PNMA1
OBS_BC_209862	V2LHS_204775	58.67	95.43	23339	VPS39
OBS_BC_209862	V2LHS_204775	51.14	94.9	23339	VPS39
OBS_BC_209865	V2LHS_66374	57.48	17.66	28513	CDH19
OBS_BC_209865	V2LHS_66374	53.05	13.79	28513	CDH19
OBS_BC_209871	V2LHS_250702	5.79	77.09	4160	MC4R
OBS_BC_209871	V2LHS_250702	4.42	69.77	4160	MC4R
OBS_BC_209873	V2LHS_252681	4.84	12.39	347732	CATSPER3
OBS_BC_209873	V2LHS_252681	2.81	4.63	347732	CATSPER3
OBS_BC_209875	V2LHS_284652	64.23	65.32	8406	SRPX
OBS_BC_209875	V2LHS_284652	60.55	52.15	8406	SRPX
OBS_BC_209879	V2LHS_150957	29.27	40.15	1446	CSN1S1
OBS_BC_209879	V2LHS_150957	25.56	37.72	1446	CSN1S1
OBS_BC_209882	V2LHS_199484	45.55	11.71	10539	GLRX3
OBS_BC_209882	V2LHS_199484	38.39	1.45	10539	GLRX3
OBS_BC_209884	V2LHS_178955	75.9	88.31	285126	DNAJC5G
OBS_BC_209884	V2LHS_178955	75.17	82.04	285126	DNAJC5G
OBS_BC_209889	V2LHS_179499	65.3	42.1	317772	HIST2H2AB
OBS_BC_209889	V2LHS_179499	54.4	28.53	317772	HIST2H2AB
OBS_BC_209902	V2LHS_200727	85.92	28.75	25825	BACE2
OBS_BC_209902	V2LHS_200727	82.73	27.33	25825	BACE2
OBS_BC_209912	V2LHS_77084	51.74	88.26	221458	KIF6
OBS_BC_209917	V2LHS_28377	54.65	89.58	9294	S1PR2
OBS_BC_209917	V2LHS_28377	53.04	84.79	9294	S1PR2
OBS_BC_209922	V2LHS_23746	11.45	49.36	8674	VAMP4
OBS_BC_209922	V2LHS_23746	9.13	48.99	8674	VAMP4
OBS_BC_209929	V2LHS_175286	80.03	54.07	54664	TMEM106B
OBS_BC_209933	V2LHS_39991	36.95	40.6	4335	MNT
OBS_BC_209940	V2LHS_198647	52.91	78.17	10111	RAD50
OBS_BC_209940	V2LHS_198647	52.53	71.65	10111	RAD50
OBS_BC_209951	V2LHS_170323	82.46	83.34	5510	PPP1R7
OBS_BC_209951	V2LHS_170323	80.5	69.04	5510	PPP1R7
OBS_BC_209953	V2LHS_77212	8.79	8.75	1421	CRYGD
OBS_BC_209953	V2LHS_77212	8.44	8.33	1421	CRYGD
OBS_BC_209958	V2LHS_154805	6.13	66.83	29015	SLC43A3
OBS_BC_209962	V2LHS_254293	34.17	77.12	5429	POLH
OBS_BC_209962	V2LHS_254293	33.29	66.97	5429	POLH
OBS_BC_209964	V2LHS_152969	44.16	41.67	6509	SLC1A4
OBS_BC_209964	V2LHS_152969	43.79	35.52	6509	SLC1A4
OBS_BC_209965	V2LHS_45113	72.39	87.64	27031	NPHP3
OBS_BC_209978	V2LHS_56944	25.76	11.02	6432	SFRS7
OBS_BC_209978	V2LHS_56944	24.85	9.55	6432	SFRS7
OBS_BC_209979	V2LHS_77664	92.37	69.71	57198	ATP8B2
OBS_BC_209979	V2LHS_77664	90.69	58.29	57198	ATP8B2
OBS_BC_209980	V2LHS_241782	24.76	49.74	143686	SESN3
OBS_BC_209980	V2LHS_241782	24.27	47.78	143686	SESN3
OBS_BC_209985	V2LHS_117458	0.19	10.63	83698	CALN1
OBS_BC_209987	V2LHS_243560	51.61	77.74	7084	TK2
OBS_BC_209987	V2LHS_243560	49.06	75.49	7084	TK2
OBS_BC_209990	V2LHS_79451	81.44	12.87	9670	IPO13
OBS_BC_209990	V2LHS_79451	78.91	11.39	9670	IPO13
OBS_BC_209998	V2LHS_234476	10.5	15.81	51321	AMZ2
OBS_BC_209998	V2LHS_234476	9.73	6.78	51321	AMZ2
OBS_BC_210005	V2LHS_93095	7.48	11.21	5896	RAG1
OBS_BC_210005	V2LHS_93095	7.45	9.42	5896	RAG1
OBS_BC_210007	V2LHS_214409	52.92	30.79	340351	AGBL3
OBS_BC_210007	V2LHS_214409	48.37	24.13	340351	AGBL3
OBS_BC_210010	V2LHS_274784	99.54	91.53	2542	SLC37A4
OBS_BC_210010	V2LHS_274784	99.48	74.62	2542	SLC37A4
OBS_BC_210016	V2LHS_57761	76.8	81.62	121457	IKIP
OBS_BC_210016	V2LHS_57761	67.34	72.4	121457	IKIP
OBS_BC_210020	V2LHS_152145	34.2	66.1	4683	NBN
OBS_BC_210020	V2LHS_152145	29.56	57.01	4683	NBN
OBS_BC_210025	V2LHS_286334	89.43	96.92	79600	TCTN1
OBS_BC_210025	V2LHS_286334	87.96	72.2	79600	TCTN1
OBS_BC_210030	V2LHS_97281	16.7	96.91	51012	SLMO2
OBS_BC_210034	V2LHS_218523	75.84	66.99	8321	FZD1
OBS_BC_210034	V2LHS_218523	72.71	61.98	8321	FZD1
OBS_BC_210035	V2LHS_67922	67.81	91.25	9488	PIGB
OBS_BC_210035	V2LHS_67922	59.4	84.29	9488	PIGB
OBS_BC_210041	V2LHS_222602	71.13	77.36	25914	RTTN
OBS_BC_210044	V2LHS_155692	24.51	41.02	1894	ECT2
OBS_BC_210045	V2LHS_239537	67.01	73.49	7421	VDR
OBS_BC_210063	V2LHS_93194	43.82	40.55	5189	PEX1
OBS_BC_210063	V2LHS_93194	43.34	22.64	5189	PEX1
OBS_BC_210064	V2LHS_47160	60.06	41.9	6626	SNRPA
OBS_BC_210065	V2LHS_19929	63.5	54.21	115265	DDIT4L
OBS_BC_210065	V2LHS_19929	44.99	37.63	115265	DDIT4L
OBS_BC_210070	V2LHS_131836	51.05	15.9	2542	SLC37A4
OBS_BC_210070	V2LHS_131836	46.98	10.47	2542	SLC37A4
OBS_BC_210072	V2LHS_225532	46.87	54.04	2936	GSR
OBS_BC_210072	V2LHS_225532	44.79	50.49	2936	GSR
OBS_BC_210076	V2LHS_231477	34.3	25.97	5728	PTEN
OBS_BC_210076	V2LHS_231477	29.28	21.8	5728	PTEN
OBS_BC_210079	V2LHS_63643	60.26	42.62	3338	DNAJC4
OBS_BC_210084	V2LHS_220190	16.09	41.01	54873	PALMD
OBS_BC_210084	V2LHS_220190	14.97	35.46	54873	PALMD
OBS_BC_210088	V2LHS_173307	74.91	96.25	6236	RRAD
OBS_BC_210088	V2LHS_173307	72.65	90.19	6236	RRAD
OBS_BC_210090	V2LHS_15703	45.06	26.88	26271	FBXO5
OBS_BC_210090	V2LHS_15703	40.14	13.49	26271	FBXO5
OBS_BC_210096	V2LHS_118343	12.1	13.14	116511	MAS1L
OBS_BC_210096	V2LHS_118343	10.14	11.39	116511	MAS1L
OBS_BC_210101	V2LHS_155439	98.06	90.88	55113, 441191, 100132793, 100134571	XKR8, RNF216L, LOC100132793, LOC100134571
OBS_BC_210103	V2LHS_285756	29.96	23.87	11120	BTN2A1
OBS_BC_210103	V2LHS_285756	28.75	12.78	11120	BTN2A1
OBS_BC_210105	V2LHS_251728	23.86	63.78	10618	TGOLN2
OBS_BC_210105	V2LHS_251728	20.51	44.82	10618	TGOLN2
OBS_BC_210110	V2LHS_154959	80.02	79.79	54798	DCHS2
OBS_BC_210110	V2LHS_154959	79.28	72.91	54798	DCHS2
OBS_BC_210114	V2LHS_28332	94.52	54.12	9308	CD83
OBS_BC_210114	V2LHS_28332	93.68	47.9	9308	CD83
OBS_BC_210116	V2LHS_38864	24.32	73.29	222484	LNX2
OBS_BC_210116	V2LHS_38864	22.02	67.14	222484	LNX2
OBS_BC_210120	V2LHS_134140	76.39	69.84	4067	LYN
OBS_BC_210120	V2LHS_134140	74.05	69.57	4067	LYN
OBS_BC_210125	V2LHS_236499	10.98	5.88	79644	SRD5A3
OBS_BC_210126	V2LHS_15732	90	65.5	25793	FBXO7
OBS_BC_210126	V2LHS_15732	89.3	57.48	25793	FBXO7
OBS_BC_210127	V2LHS_134509	64.79	46.84	51072	MEMO1
OBS_BC_210127	V2LHS_134509	58.07	43.41	51072	MEMO1
OBS_BC_210138	V2LHS_37234	69.47	52.84	3932	LCK
OBS_BC_210138	V2LHS_37234	65.8	49.81	3932	LCK
OBS_BC_210146	V2LHS_133016	29.94	58.21	3064	HTT
OBS_BC_210146	V2LHS_133016	28.81	54.61	3064	HTT
OBS_BC_210147	V2LHS_49350	3	10.29	151230	KLHL23
OBS_BC_210147	V2LHS_49350	1.44	7.86	151230	KLHL23
OBS_BC_210150	V2LHS_169759	21.66	81.33	5147	PDE6D
OBS_BC_210154	V2LHS_71732	29.01	31.32	146722	CD300LF
OBS_BC_210154	V2LHS_71732	25.83	26.68	146722	CD300LF
OBS_BC_210156	V2LHS_153554	61	30.35	6746	SSR2
OBS_BC_210156	V2LHS_153554	49.28	25.5	6746	SSR2
OBS_BC_210157	V2LHS_170739	37.18	12.96	5694	PSMB6
OBS_BC_210157	V2LHS_170739	34.43	10.02	5694	PSMB6
OBS_BC_210160	V2LHS_41523	86.32	86.1	8239	USP9X
OBS_BC_210160	V2LHS_41523	85.86	86.04	8239	USP9X
OBS_BC_210168	V2LHS_135671	30.51	23.89	65986	ZBTB10
OBS_BC_210168	V2LHS_135671	28.14	18.71	65986	ZBTB10
OBS_BC_210171	V2LHS_199963	94.09	44.28	3151, 57570, 729505	HMGN2, TRMT5, LOC729505
OBS_BC_210171	V2LHS_199963	94.05	37.69	3151, 57570, 729505	HMGN2, TRMT5, LOC729505
OBS_BC_210174	V2LHS_152416	31.03	64.53	4947	OAZ2
OBS_BC_210174	V2LHS_152416	30.05	51.21	4947	OAZ2
OBS_BC_210180	V2LHS_154990	39.74	36.38	54802	TRIT1
OBS_BC_210180	V2LHS_154990	37.1	14.85	54802	TRIT1
OBS_BC_210183	V2LHS_195963	13.18	24.81	56062	KLHL4
OBS_BC_210183	V2LHS_195963	8.7	15.91	56062	KLHL4
OBS_BC_210184	V2LHS_210668	11.16	45.48	23645	PPP1R15A
OBS_BC_210186	V2LHS_201855	80.26	93.8	11083	DIDO1
OBS_BC_210186	V2LHS_201855	70.63	93.74	11083	DIDO1
OBS_BC_210189	V2LHS_50196	42.43	64.77	4651	MYO10
OBS_BC_210189	V2LHS_50196	37.03	62.52	4651	MYO10
OBS_BC_210190	V2LHS_212805	88.44	34.41	91801	ALKBH8
OBS_BC_210190	V2LHS_212805	87.84	20.71	91801	ALKBH8
OBS_BC_210201	V2LHS_202650	55.44	92.96	10564	ARFGEF2
OBS_BC_210201	V2LHS_202650	50.12	79.03	10564	ARFGEF2
OBS_BC_210203	V2LHS_56296	73.11	67.07	6921	TCEB1
OBS_BC_210203	V2LHS_56296	69.51	42.73	6921	TCEB1
OBS_BC_210204	V2LHS_221461	12.6	14.8	55796	MBNL3
OBS_BC_210204	V2LHS_221461	12.15	6.92	55796	MBNL3
OBS_BC_210207	V2LHS_153573	98.94	29	6775	STAT4
OBS_BC_210207	V2LHS_153573	98.44	25.32	6775	STAT4
OBS_BC_210219	V2LHS_259086	72.86	97.94	27329	ANGPTL3
OBS_BC_210219	V2LHS_259086	64.58	95.64	27329	ANGPTL3
OBS_BC_210224	V2LHS_38688	78.63	64.79	221074	SLC39A12
OBS_BC_210224	V2LHS_38688	78.07	62.12	221074	SLC39A12
OBS_BC_210227	V2LHS_76249	53.98	64.88	85446	ZFHX2
OBS_BC_210227	V2LHS_76249	51.61	57.2	85446	ZFHX2
OBS_BC_210228	V2LHS_136379	16.68	51.63	79623	GALNT14
OBS_BC_210228	V2LHS_136379	14.73	46.12	79623	GALNT14
OBS_BC_210236	V2LHS_49022	38.82	97.13	3298	HSF2
OBS_BC_210236	V2LHS_49022	34.88	96.34	3298	HSF2
OBS_BC_210237	V2LHS_244580	91.54	90.42	7975	MAFK
OBS_BC_210237	V2LHS_244580	89.05	88.93	7975	MAFK
OBS_BC_210245	V2LHS_261801	53.96	56.38	6334	SCN8A
OBS_BC_210245	V2LHS_261801	45.62	46.96	6334	SCN8A
OBS_BC_210247	V2LHS_96846	76.44	84.84	26003	GORASP2
OBS_BC_210247	V2LHS_96846	76.43	79.22	26003	GORASP2
OBS_BC_210250	V2LHS_256708	88.3	79.19	4128	MAOA
OBS_BC_210250	V2LHS_256708	86.21	75.51	4128	MAOA
OBS_BC_210251	V2LHS_94171	63.49	61.69	21	ABCA3
OBS_BC_210251	V2LHS_94171	59.46	43.47	21	ABCA3
OBS_BC_210259	V2LHS_84010	14.38	6.03	1836	SLC26A2
OBS_BC_210259	V2LHS_84010	11.9	4.94	1836	SLC26A2
OBS_BC_210262	V2LHS_217973	81.53	85.31	7472	WNT2
OBS_BC_210276	V2LHS_62806	51.41	21.49	147912	SIX5
OBS_BC_210279	V2LHS_68631	42.4	64.41	6605, 125113, 400129	SMARCE1, KRT222P, LOC400129
OBS_BC_210279	V2LHS_68631	40.99	51.75	6605, 125113, 400129	SMARCE1, KRT222P, LOC400129
OBS_BC_210293	V2LHS_48937	37.07	68.71	230	ALDOC
OBS_BC_210293	V2LHS_48937	36.7	61.85	230	ALDOC
OBS_BC_210295	V2LHS_277052	71.88	83.75	55662	HIF1AN
OBS_BC_210295	V2LHS_277052	67.43	79.59	55662	HIF1AN
OBS_BC_210300	V2LHS_195900	56.53	57.42	-	-
OBS_BC_210300	V2LHS_195900	48.65	52.79	-	-
OBS_BC_210305	V2LHS_199868	12.32	93.38	10576	CCT2
OBS_BC_210316	V2LHS_32625	86.78	45.4	5997	RGS2
OBS_BC_210316	V2LHS_32625	85.42	42.82	5997	RGS2
OBS_BC_210318	V2LHS_220279	79.18	60.04	1015	CDH17
OBS_BC_210318	V2LHS_220279	78.46	58.34	1015	CDH17
OBS_BC_210321	V2LHS_154060	75.31	40.62	7074	TIAM1
OBS_BC_210321	V2LHS_154060	73.48	40.48	7074	TIAM1
OBS_BC_210322	V2LHS_138759	96.43	66.57	-	-
OBS_BC_210322	V2LHS_138759	95.82	52.41	-	-
OBS_BC_210326	V2LHS_151557	19.24	23.77	4133	MAP2
OBS_BC_210326	V2LHS_151557	17.91	23.04	4133	MAP2
OBS_BC_210327	V2LHS_170280	79.01	59.29	5493	PPL
OBS_BC_210330	V2LHS_46803	83.68	19.42	56265	CPXM1
OBS_BC_210331	V2LHS_231672	23.47	46.95	22905	EPN2
OBS_BC_210331	V2LHS_231672	22.8	38.17	22905	EPN2
OBS_BC_210343	V2LHS_227114	63.92	58.23	64858	DCLRE1B
OBS_BC_210343	V2LHS_227114	58.09	45.6	64858	DCLRE1B
OBS_BC_210348	V2LHS_281592	50.33	31.78	10563	CXCL13
OBS_BC_210349	V2LHS_67332	86.05	40.41	9577	BRE
OBS_BC_210349	V2LHS_67332	84.32	36.57	9577	BRE
OBS_BC_210354	V2LHS_53075	62.97	50.07	255926	ADAM5P
OBS_BC_210354	V2LHS_53075	49.94	30.81	255926	ADAM5P
OBS_BC_210361	V2LHS_74476	6.87	1.44	59274	MESDC1
OBS_BC_210361	V2LHS_74476	5.09	0.2	59274	MESDC1
OBS_BC_210362	V2LHS_170867	41.16	14.44	5744	PTHLH
OBS_BC_210362	V2LHS_170867	34.27	13.8	5744	PTHLH
OBS_BC_210364	V2LHS_171002	68.02	56.96	5796	PTPRK
OBS_BC_210364	V2LHS_171002	65.02	36.96	5796	PTPRK
OBS_BC_210374	V2LHS_196645	95.6	95.24	11143	MYST2
OBS_BC_210374	V2LHS_196645	95.03	87.38	11143	MYST2
OBS_BC_210385	V2LHS_247187	97.93	69.6	140735	DYNLL2
OBS_BC_210385	V2LHS_247187	97.69	62.54	140735	DYNLL2
OBS_BC_210390	V2LHS_94381	57.34	92.91	159	ADSS
OBS_BC_210390	V2LHS_94381	54.81	88.78	159	ADSS
OBS_BC_210395	V2LHS_241090	12.92	19.84	253430	IPMK
OBS_BC_210395	V2LHS_241090	11.19	12.84	253430	IPMK
OBS_BC_210406	V2LHS_16513	41.09	66.19	90249	UNC5A
OBS_BC_210406	V2LHS_16513	34.92	59.19	90249	UNC5A
OBS_BC_210411	V2LHS_189569	87.48	47.58	54700, 653390, 730092, 100131998	RRN3, LOC653390, LOC730092, LOC100131998
OBS_BC_210411	V2LHS_189569	86.86	38.38	54700, 653390, 730092, 100131998	RRN3, LOC653390, LOC730092, LOC100131998
OBS_BC_210416	V2LHS_283841	61.51	62.15	80824	DUSP16
OBS_BC_210416	V2LHS_283841	55.93	55.97	80824	DUSP16
OBS_BC_210418	V2LHS_61201	50	17.33	4643	MYO1E
OBS_BC_210420	V2LHS_131460	39	35.99	5638	PRRG1
OBS_BC_210427	V2LHS_82923	26.17	85.48	64446	DNAI2
OBS_BC_210427	V2LHS_82923	25.72	84.37	64446	DNAI2
OBS_BC_210428	V2LHS_84227	59.41	35.29	1535	CYBA
OBS_BC_210428	V2LHS_84227	55.2	28.13	1535	CYBA
OBS_BC_210431	V2LHS_181704	67.22	63.64	90313	TP53I13
OBS_BC_210436	V2LHS_176917	40.39	82.9	80003	PCNXL2
OBS_BC_210455	V2LHS_132431	48.99	84.92	53	ACP2
OBS_BC_210460	V2LHS_96072	93.04	79.52	22859	LPHN1
OBS_BC_210460	V2LHS_96072	92.86	76.17	22859	LPHN1
OBS_BC_210461	V2LHS_157825	1.45	15.27	79848	CSPP1
OBS_BC_210461	V2LHS_157825	1.14	7.17	79848	CSPP1
OBS_BC_210462	V2LHS_113721	84.9	79.43	2014	EMP3
OBS_BC_210462	V2LHS_113721	84.52	72.41	2014	EMP3
OBS_BC_210465	V2LHS_150774	13.25	22.21	1307	COL16A1
OBS_BC_210465	V2LHS_150774	12.13	21.1	1307	COL16A1
OBS_BC_210473	V2LHS_14848	39.23	80.73	92291	CAPN13
OBS_BC_210473	V2LHS_14848	37.6	79.61	92291	CAPN13
OBS_BC_210475	V2LHS_283882	67.19	98.1	22879	MON1B
OBS_BC_210475	V2LHS_283882	64.01	96.66	22879	MON1B
OBS_BC_210477	V2LHS_221705	64.32	26.85	55330	CNO
OBS_BC_210485	V2LHS_238579	78.27	29.1	51094	ADIPOR1
OBS_BC_210487	V2LHS_197059	80.94	94.98	27297	RCP9
OBS_BC_210491	V2LHS_150656	5.38	2.61	8218	CLTCL1
OBS_BC_210491	V2LHS_150656	4.44	2.35	8218	CLTCL1
OBS_BC_210495	V2LHS_133770	3.19	67.52	3839	KPNA3
OBS_BC_210495	V2LHS_133770	1.16	57.39	3839	KPNA3
OBS_BC_210497	V2LHS_152342	24.17	19.11	4884	NPTX1
OBS_BC_210497	V2LHS_152342	22.67	16.1	4884	NPTX1
OBS_BC_210498	V2LHS_222298	52.69	22.03	55676	SLC30A6
OBS_BC_210498	V2LHS_222298	51.39	19.3	55676	SLC30A6
OBS_BC_210500	V2LHS_201795	58.08	94.56	994	CDC25B
OBS_BC_210500	V2LHS_201795	53.94	67.02	994	CDC25B
OBS_BC_210507	V2LHS_150390	62.72	89.55	965	CD58
OBS_BC_210507	V2LHS_150390	56.5	73.51	965	CD58
OBS_BC_210512	V2LHS_45513	67.49	38.98	-	-
OBS_BC_210512	V2LHS_45513	62.03	34.63	-	-
OBS_BC_210520	V2LHS_262494	9.77	24.13	4140	MARK3
OBS_BC_210520	V2LHS_262494	6.09	18.68	4140	MARK3
OBS_BC_210521	V2LHS_253462	99.85	70.25	11075	STMN2
OBS_BC_210521	V2LHS_253462	99.27	67.49	11075	STMN2
OBS_BC_210522	V2LHS_31614	3.28	4.19	6304	SATB1
OBS_BC_210522	V2LHS_31614	2.33	0.44	6304	SATB1
OBS_BC_210527	V2LHS_59244	57.33	91.21	50617	ATP6V0A4
OBS_BC_210527	V2LHS_59244	49.96	73.01	50617	ATP6V0A4
OBS_BC_210533	V2LHS_51692	34.5	94.75	27232	GNMT
OBS_BC_210533	V2LHS_51692	29.4	91.2	27232	GNMT
OBS_BC_210537	V2LHS_238776	91.61	91	84631	SLITRK2
OBS_BC_210540	V2LHS_172653	85.89	18.24	51	ACOX1
OBS_BC_210540	V2LHS_172653	83.36	12.54	51	ACOX1
OBS_BC_210541	V2LHS_46461	82.6	39.17	9058	SLC13A2
OBS_BC_210541	V2LHS_46461	80.7	38.61	9058	SLC13A2
OBS_BC_210546	V2LHS_254742	14.83	49.3	5887	RAD23B
OBS_BC_210546	V2LHS_254742	13.85	31.73	5887	RAD23B
OBS_BC_210551	V2LHS_202874	80.31	87.34	91137	SLC25A46
OBS_BC_210551	V2LHS_202874	80.06	77.53	91137	SLC25A46
OBS_BC_210552	V2LHS_205611	43.93	81.95	57552	AADACL1
OBS_BC_210552	V2LHS_205611	43.41	78.87	57552	AADACL1
OBS_BC_210555	V2LHS_150041	60.83	90.8	646	BNC1
OBS_BC_210555	V2LHS_150041	57.95	88.67	646	BNC1
OBS_BC_210556	V2LHS_220016	50.14	88.4	54471	SMCR7L
OBS_BC_210561	V2LHS_62932	33.49	61.51	9589, 646517	WTAP, LOC646517
OBS_BC_210561	V2LHS_62932	25.81	50.7	9589, 646517	WTAP, LOC646517
OBS_BC_210565	V2LHS_243054	17.92	48.37	131965	METTL6
OBS_BC_210567	V2LHS_23421	25.58	8.8	8710	SERPINB7
OBS_BC_210567	V2LHS_23421	18.45	7.2	8710	SERPINB7
OBS_BC_210568	V2LHS_236822	48.15	45.34	506	ATP5B
OBS_BC_210568	V2LHS_236822	43.97	41.75	506	ATP5B
OBS_BC_210573	V2LHS_170862	4.35	7.65	5721	PSME2
OBS_BC_210573	V2LHS_170862	3.44	2.96	5721	PSME2
OBS_BC_210574	V2LHS_154161	79.27	36.03	29855	UBN1
OBS_BC_210575	V2LHS_61078	63.86	19.08	145173	B3GALTL
OBS_BC_210575	V2LHS_61078	52.01	14.03	145173	B3GALTL
OBS_BC_210579	V2LHS_94595	96.31	98.72	364	AQP7
OBS_BC_210579	V2LHS_94595	96.18	95.99	364	AQP7
OBS_BC_210580	V2LHS_153958	90.2	62.25	7038	TG
OBS_BC_210585	V2LHS_195528	46.66	22.5	80055	PGAP1
OBS_BC_210585	V2LHS_195528	45.38	18.06	80055	PGAP1
OBS_BC_210589	V2LHS_214987	90.07	55.32	27241	BBS9
OBS_BC_210589	V2LHS_214987	89.9	44.71	27241	BBS9
OBS_BC_210591	V2LHS_16597	32.92	53.75	8807	IL18RAP
OBS_BC_210591	V2LHS_16597	27	50.94	8807	IL18RAP
OBS_BC_210596	V2LHS_133509	38.95	65.01	3699	ITIH3
OBS_BC_210596	V2LHS_133509	33.25	61.36	3699	ITIH3
OBS_BC_210601	V2LHS_11941	91.85	90.4	4194	MDM4
OBS_BC_210601	V2LHS_11941	87.32	80.94	4194	MDM4
OBS_BC_210605	V2LHS_237521	8.03	5.44	2743	GLRB
OBS_BC_210605	V2LHS_237521	5.43	4.93	2743	GLRB
OBS_BC_210607	V2LHS_77357	51.91	45.55	3383	ICAM1
OBS_BC_210607	V2LHS_77357	49.63	31.67	3383	ICAM1
OBS_BC_210610	V2LHS_204560	65.74	49.38	6336	SCN10A
OBS_BC_210610	V2LHS_204560	63.23	32.69	6336	SCN10A
OBS_BC_210617	V2LHS_240877	37.88	58.9	219539	YPEL4
OBS_BC_210617	V2LHS_240877	27.86	55.64	219539	YPEL4
OBS_BC_210619	V2LHS_134918	41.71	54.15	10888	GPR83
OBS_BC_210621	V2LHS_69446	51.13	75.46	389	RHOC
OBS_BC_210626	V2LHS_154041	43.47	2.97	7064	THOP1
OBS_BC_210635	V2LHS_173251	80.02	30.23	5516	PPP2CB
OBS_BC_210635	V2LHS_173251	74.21	28.19	5516	PPP2CB
OBS_BC_210636	V2LHS_181875	77.64	75.58	200186	CRTC2
OBS_BC_210636	V2LHS_181875	77.36	56.51	200186	CRTC2
OBS_BC_210641	V2LHS_229184	3.67	2.23	162	AP1B1
OBS_BC_210641	V2LHS_229184	3.5	1.17	162	AP1B1
OBS_BC_210646	V2LHS_156697	86.98	97.15	55273	TMEM100
OBS_BC_210654	V2LHS_17324	17.71	66.61	2250	FGF5
OBS_BC_210654	V2LHS_17324	16.16	52.74	2250	FGF5
OBS_BC_210668	V2LHS_25543	63.85	31.25	118788	PIK3AP1
OBS_BC_210682	V2LHS_221232	33.34	83.9	5620	PRM2
OBS_BC_210682	V2LHS_221232	25.44	74.2	5620	PRM2
OBS_BC_210683	V2LHS_162314	69.02	19.63	1184	CLCN5
OBS_BC_210683	V2LHS_162314	65.55	13.91	1184	CLCN5
OBS_BC_210684	V2LHS_154816	35.6	94.59	29980	DONSON
OBS_BC_210686	V2LHS_194980	16.66	35.73	9117	SEC22C
OBS_BC_210689	V2LHS_169890	93.55	49.72	5207	PFKFB1
OBS_BC_210689	V2LHS_169890	91.93	43.13	5207	PFKFB1
OBS_BC_210698	V2LHS_65477	18.91	18.68	29780	PARVB
OBS_BC_210698	V2LHS_65477	18.56	17.27	29780	PARVB
OBS_BC_210699	V2LHS_224267	11.88	5.76	79822	ARHGAP28
OBS_BC_210699	V2LHS_224267	10.45	3.2	79822	ARHGAP28
OBS_BC_210702	V2LHS_56108	2.38	4.15	7355	SLC35A2
OBS_BC_210702	V2LHS_56108	1.79	0.86	7355	SLC35A2
OBS_BC_210705	V2LHS_168732	16.55	6.94	83598	LUZPP1
OBS_BC_210705	V2LHS_168732	16.15	1.98	83598	LUZPP1
OBS_BC_210706	V2LHS_231331	98.42	22.19	6770	STAR
OBS_BC_210706	V2LHS_231331	97.41	19.18	6770	STAR
OBS_BC_210711	V2LHS_135083	2.21	6.92	51773	RSF1
OBS_BC_210711	V2LHS_135083	1.18	2.04	51773	RSF1
OBS_BC_210712	V2LHS_179509	88.94	58.46	319100	TAAR6
OBS_BC_210712	V2LHS_179509	88.37	43.08	319100	TAAR6
OBS_BC_210718	V2LHS_19871	70.33	36.39	2081	ERN1
OBS_BC_210718	V2LHS_19871	65.03	17.42	2081	ERN1
OBS_BC_210720	V2LHS_194374	49.01	43.16	2543, 2574, 2575, 2576, 2577, 2578, 2579, 26748, 26749, 643832, 645051, 645073, 727687, 729396, 729408, 729422, 729428, 729431, 729442, 729447, 100132399	GAGE1, GAGE2A, GAGE3, GAGE4, GAGE5, GAGE6, GAGE7, GAGE12I, GAGE8, GAGE10, GAGE12D, GAGE12G, GAGE13, GAGE12J, CTD-2248C21.2, GAGE12C, GAGE12B, GAGE12E, GAGE12H, LOC729447, LOC100132399
OBS_BC_210720	V2LHS_194374	40.57	39.21	2543, 2574, 2575, 2576, 2577, 2578, 2579, 26748, 26749, 643832, 645051, 645073, 727687, 729396, 729408, 729422, 729428, 729431, 729442, 729447, 100132399	GAGE1, GAGE2A, GAGE3, GAGE4, GAGE5, GAGE6, GAGE7, GAGE12I, GAGE8, GAGE10, GAGE12D, GAGE12G, GAGE13, GAGE12J, CTD-2248C21.2, GAGE12C, GAGE12B, GAGE12E, GAGE12H, LOC729447, LOC100132399
OBS_BC_210732	V2LHS_150997	72.62	47.59	1459	CSNK2A2
OBS_BC_210732	V2LHS_150997	69.21	31.09	1459	CSNK2A2
OBS_BC_210748	V2LHS_158617	45.6	52.87	83786	FRMD8
OBS_BC_210748	V2LHS_158617	45.51	38.93	83786	FRMD8
OBS_BC_210749	V2LHS_22995	41.42	51.29	-	-
OBS_BC_210749	V2LHS_22995	37.93	45.7	-	-
OBS_BC_210753	V2LHS_175004	66.98	53.71	55298	RNF121
OBS_BC_210753	V2LHS_175004	62.78	32.82	55298	RNF121
OBS_BC_210757	V2LHS_51233	41.64	72.16	54431	DNAJC10
OBS_BC_210770	V2LHS_19999	76.73	63.88	55740	ENAH
OBS_BC_210770	V2LHS_19999	75.46	58.09	55740	ENAH
OBS_BC_210774	V2LHS_31055	64.13	59.17	6369	CCL24
OBS_BC_210776	V2LHS_218228	52.33	35.03	55031	USP47
OBS_BC_210776	V2LHS_218228	50.94	27.5	55031	USP47
OBS_BC_210785	V2LHS_135557	13.32	6.62	53335	BCL11A
OBS_BC_210785	V2LHS_135557	11.86	2.71	53335	BCL11A
OBS_BC_210786	V2LHS_68112	75.04	91.55	10054, 645503	UBA2, LOC645503
OBS_BC_210786	V2LHS_68112	66.5	87.87	10054, 645503	UBA2, LOC645503
OBS_BC_210795	V2LHS_181271	81.63	24.84	147381	CBLN2
OBS_BC_210796	V2LHS_98096	90.67	81.1	10133	OPTN
OBS_BC_210796	V2LHS_98096	87.28	79.92	10133	OPTN
OBS_BC_210804	V2LHS_202980	45.19	30.77	1187, 1188	CLCNKA, CLCNKB
OBS_BC_210806	V2LHS_171278	52.21	62.57	5931	RBBP7
OBS_BC_210806	V2LHS_171278	49.36	44.62	5931	RBBP7
OBS_BC_210810	V2LHS_86409	46.63	13.37	7468	WHSC1
OBS_BC_210810	V2LHS_86409	39.57	10.86	7468	WHSC1
OBS_BC_210818	V2LHS_140620	39.51	26.97	203074	UNQ9391
OBS_BC_210818	V2LHS_140620	35.23	24.41	203074	UNQ9391
OBS_BC_210821	V2LHS_47917	77.32	99.85	10737, 10740	RFPL3S, RFPL1S
OBS_BC_210821	V2LHS_47917	72.54	99.61	10737, 10740	RFPL3S, RFPL1S
OBS_BC_210822	V2LHS_228916	43.65	77.47	91746	YTHDC1
OBS_BC_210822	V2LHS_228916	41.24	63.08	91746	YTHDC1
OBS_BC_210825	V2LHS_178494	82.86	80.47	92745	SLC38A5
OBS_BC_210825	V2LHS_178494	80.67	69.21	92745	SLC38A5
OBS_BC_210826	V2LHS_96322	67.82	72.36	22907	DHX30
OBS_BC_210831	V2LHS_61176	58.05	40.4	4323	MMP14
OBS_BC_210831	V2LHS_61176	56.97	26.74	4323	MMP14
OBS_BC_210836	V2LHS_43213	52.83	86.44	201780	SLC10A4
OBS_BC_210836	V2LHS_43213	49.07	65.65	201780	SLC10A4
OBS_BC_210842	V2LHS_249025	8.91	43.72	134526	ACOT12
OBS_BC_210844	V2LHS_15049	78.15	81.15	836	CASP3
OBS_BC_210844	V2LHS_15049	70.38	69.81	836	CASP3
OBS_BC_210848	V2LHS_73009	90.49	92.95	1996	ELAVL4
OBS_BC_210848	V2LHS_73009	88.9	87.66	1996	ELAVL4
OBS_BC_210853	V2LHS_63085	85.6	85.38	3855	KRT7
OBS_BC_210853	V2LHS_63085	83.53	73.34	3855	KRT7
OBS_BC_210869	V2LHS_15298	79.54	48.42	26515	FXC1
OBS_BC_210869	V2LHS_15298	77.88	46.64	26515	FXC1
OBS_BC_210870	V2LHS_191725	76.3	58.52	155400, 260294	NSUN5B, NSUN5C
OBS_BC_210870	V2LHS_191725	71.07	54.75	155400, 260294	NSUN5B, NSUN5C
OBS_BC_210876	V2LHS_231072	36.03	19.39	80830	APOL6
OBS_BC_210881	V2LHS_218574	86.45	80.83	118427	OLFM3
OBS_BC_210884	V2LHS_116375	95.33	95.72	65083	NOL6
OBS_BC_210884	V2LHS_116375	93.47	91.06	65083	NOL6
OBS_BC_210888	V2LHS_50670	79.32	62.37	56949	XAB2
OBS_BC_210888	V2LHS_50670	75.56	57.77	56949	XAB2
OBS_BC_210891	V2LHS_58955	98.18	77.74	55423	SIRPG
OBS_BC_210891	V2LHS_58955	97.35	59.87	55423	SIRPG
OBS_BC_210894	V2LHS_138894	45.31	68.63	84376	HOOK3
OBS_BC_210894	V2LHS_138894	40.66	48.21	84376	HOOK3
OBS_BC_210900	V2LHS_160538	46.72	73.36	128553	TSHZ2
OBS_BC_210900	V2LHS_160538	38.86	65.04	128553	TSHZ2
OBS_BC_210901	V2LHS_151465	76.84	81.8	2109	ETFB
OBS_BC_210901	V2LHS_151465	76.44	81.35	2109	ETFB
OBS_BC_210906	V2LHS_151077	53.59	70.69	1523	CUX1
OBS_BC_210906	V2LHS_151077	49.86	64.06	1523	CUX1
OBS_BC_210907	V2LHS_170276	57.51	46.34	5473	PPBP
OBS_BC_210922	V2LHS_156808	98.59	27.27	79659	DYNC2H1
OBS_BC_210925	V2LHS_245372	13.26	83.63	6611, 642590, 646347	SMS, LOC642590, LOC646347
OBS_BC_210925	V2LHS_245372	11.83	65.92	6611, 642590, 646347	SMS, LOC642590, LOC646347
OBS_BC_210934	V2LHS_135946	14.39	1	79188	TMEM43
OBS_BC_210934	V2LHS_135946	12.71	0.71	79188	TMEM43
OBS_BC_210946	V2LHS_35896	99.9	66.6	199746	U2AF1L4
OBS_BC_210946	V2LHS_35896	99.69	66.59	199746	U2AF1L4
OBS_BC_210948	V2LHS_29085	35.5	44.41	10059	DNM1L
OBS_BC_210949	V2LHS_240695	73.83	53.19	8635	RNASET2
OBS_BC_210949	V2LHS_240695	73.24	40.18	8635	RNASET2
OBS_BC_210951	V2LHS_55670	50.61	92.83	10058	ABCB6
OBS_BC_210951	V2LHS_55670	47.87	70.78	10058	ABCB6
OBS_BC_210955	V2LHS_262915	67.74	90.42	388	RHOB
OBS_BC_210955	V2LHS_262915	64.38	85.35	388	RHOB
OBS_BC_210956	V2LHS_66509	70.85	69.66	9988	DMTF1
OBS_BC_210959	V2LHS_42064	42.43	30.11	2829	XCR1
OBS_BC_210959	V2LHS_42064	38.91	29.02	2829	XCR1
OBS_BC_210964	V2LHS_229555	82.81	62.4	6430	SFRS5
OBS_BC_210964	V2LHS_229555	79.19	58.43	6430	SFRS5
OBS_BC_210969	V2LHS_241862	50.67	49.46	23607	CD2AP
OBS_BC_210969	V2LHS_241862	44.04	38.2	23607	CD2AP
OBS_BC_210974	V2LHS_238974	71.14	57.1	55510	DDX43
OBS_BC_210974	V2LHS_238974	65.68	54.25	55510	DDX43
OBS_BC_210980	V2LHS_198518	74.49	62.21	11261	CHP
OBS_BC_210980	V2LHS_198518	67.6	59.64	11261	CHP
OBS_BC_210981	V2LHS_80186	38.53	28.81	23336	DMN
OBS_BC_210981	V2LHS_80186	34.95	25.81	23336	DMN
OBS_BC_210982	V2LHS_132327	25.04	18.69	3597	IL13RA1
OBS_BC_210984	V2LHS_69916	40.38	43.42	5981	RFC1
OBS_BC_210984	V2LHS_69916	39.4	36.02	5981	RFC1
OBS_BC_210988	V2LHS_102360	51.67	87.28	113263	GLCCI1
OBS_BC_211000	V2LHS_178659	63.59	61.03	283284	IGSF22
OBS_BC_211000	V2LHS_178659	59.42	43.67	283284	IGSF22
OBS_BC_211004	V2LHS_33349	22.88	19.56	317703	VN1R4
OBS_BC_211004	V2LHS_33349	22.19	12.57	317703	VN1R4
OBS_BC_211006	V2LHS_62668	98.74	54.52	129685	TAF8
OBS_BC_211006	V2LHS_62668	98.68	45.54	129685	TAF8
OBS_BC_211008	V2LHS_228921	78.35	82.19	6947	TCN1
OBS_BC_211008	V2LHS_228921	75.69	81.66	6947	TCN1
OBS_BC_211022	V2LHS_284669	35.5	82.77	4319	MMP10
OBS_BC_211022	V2LHS_284669	35.31	78.3	4319	MMP10
OBS_BC_211025	V2LHS_222083	42.3	25.68	5673	PSG5
OBS_BC_211025	V2LHS_222083	42.24	24.72	5673	PSG5
OBS_BC_211029	V2LHS_151120	62.72	23.68	1635	DCTD
OBS_BC_211029	V2LHS_151120	58.81	17.32	1635	DCTD
OBS_BC_211039	V2LHS_281222	71.25	60.17	3621	ING1
OBS_BC_211039	V2LHS_281222	67.98	52.64	3621	ING1
OBS_BC_211044	V2LHS_93915	5.11	8.95	6337	SCNN1A
OBS_BC_211044	V2LHS_93915	3.04	3.38	6337	SCNN1A
OBS_BC_211048	V2LHS_216603	77.09	94.5	10269	ZMPSTE24
OBS_BC_211049	V2LHS_134239	96.67	46.03	51365	PLA1A
OBS_BC_211049	V2LHS_134239	96.58	34.95	51365	PLA1A
OBS_BC_211054	V2LHS_14937	32.88	83.99	90861	HN1L
OBS_BC_211057	V2LHS_81472	92.79	67.34	64321	SOX17
OBS_BC_211057	V2LHS_81472	90.06	55.93	64321	SOX17
OBS_BC_211058	V2LHS_19462	92.8	45.45	5551	PRF1
OBS_BC_211058	V2LHS_19462	89.97	44.18	5551	PRF1
OBS_BC_211068	V2LHS_173577	77.67	86.33	54878	DPP8
OBS_BC_211074	V2LHS_84917	13.43	32.58	4174	MCM5
OBS_BC_211075	V2LHS_232530	92.14	62.97	51106	TFB1M
OBS_BC_211075	V2LHS_232530	91.57	58.1	51106	TFB1M
OBS_BC_211092	V2LHS_286907	92.02	83.58	128821	CST9L
OBS_BC_211092	V2LHS_286907	91.32	82.18	128821	CST9L
OBS_BC_211100	V2LHS_66517	61.95	57.72	10309	CCNO
OBS_BC_211111	V2LHS_203428	81.96	67.71	23016	EXOSC7
OBS_BC_211111	V2LHS_203428	80.76	63.02	23016	EXOSC7
OBS_BC_211113	V2LHS_221184	80.32	91.45	84947	SERAC1
OBS_BC_211116	V2LHS_239613	87.76	78.61	-	-
OBS_BC_211116	V2LHS_239613	87.45	57.56	-	-
OBS_BC_211118	V2LHS_103255	90.29	87.65	-	-
OBS_BC_211118	V2LHS_103255	88.97	65.23	-	-
OBS_BC_211126	V2LHS_18018	81.95	93.38	1960	EGR3
OBS_BC_211126	V2LHS_18018	80.22	76.23	1960	EGR3
OBS_BC_211128	V2LHS_49269	42.36	40.28	9374	PPT2
OBS_BC_211128	V2LHS_49269	39.49	38.24	9374	PPT2
OBS_BC_211132	V2LHS_150451	84.38	85.23	1001	CDH3
OBS_BC_211132	V2LHS_150451	83.74	78.01	1001	CDH3
OBS_BC_211135	V2LHS_19965	26.44	19.54	23443	SLC35A3
OBS_BC_211136	V2LHS_39438	16.82	14.51	26507	CNNM1
OBS_BC_211136	V2LHS_39438	16.39	10.5	26507	CNNM1
OBS_BC_211146	V2LHS_163430	42.12	80.54	285242	HTR3E
OBS_BC_211146	V2LHS_163430	41.75	71.07	285242	HTR3E
OBS_BC_211149	V2LHS_48338	74.03	44.15	892	CCNC
OBS_BC_211149	V2LHS_48338	69.38	25.48	892	CCNC
OBS_BC_211156	V2LHS_151136	49.2	24.28	1647	GADD45A
OBS_BC_211156	V2LHS_151136	42.7	18.11	1647	GADD45A
OBS_BC_211157	V2LHS_221630	91.6	85.65	4588	MUC6
OBS_BC_211157	V2LHS_221630	90.97	65.24	4588	MUC6
OBS_BC_211161	V2LHS_91011	39.06	32.49	10791	VAMP5
OBS_BC_211161	V2LHS_91011	35.64	32.37	10791	VAMP5
OBS_BC_211166	V2LHS_33954	15.35	46.01	8335	HIST1H2AB
OBS_BC_211166	V2LHS_33954	15.11	35.56	8335	HIST1H2AB
OBS_BC_211168	V2LHS_208229	85	79.06	4665	NAB2
OBS_BC_211168	V2LHS_208229	80.42	75.74	4665	NAB2
OBS_BC_211171	V2LHS_18055	20.9	27.99	137835	TMEM71
OBS_BC_211174	V2LHS_224994	48.39	43.52	342372	PKD1L3
OBS_BC_211174	V2LHS_224994	47.77	43.44	342372	PKD1L3
OBS_BC_211175	V2LHS_36748	39.22	34.38	-	-
OBS_BC_211175	V2LHS_36748	38.43	16.11	-	-
OBS_BC_211177	V2LHS_65789	90.98	86.15	29760	BLNK
OBS_BC_211182	V2LHS_182823	90.21	65.06	390928	FLJ16165
OBS_BC_211187	V2LHS_169933	15.17	26.59	5236	PGM1
OBS_BC_211187	V2LHS_169933	14.53	20.01	5236	PGM1
OBS_BC_211188	V2LHS_133018	85.77	89.08	3064	HTT
OBS_BC_211188	V2LHS_133018	78.39	84.73	3064	HTT
OBS_BC_211193	V2LHS_111645	23.39	23.68	5054	SERPINE1
OBS_BC_211193	V2LHS_111645	22.67	10.86	5054	SERPINE1
OBS_BC_211195	V2LHS_172586	43.05	78.13	8323	FZD6
OBS_BC_211211	V2LHS_218226	21.6	54.11	5578	PRKCA
OBS_BC_211215	V2LHS_18224	64.69	58.63	1857	DVL3
OBS_BC_211215	V2LHS_18224	61.74	44.33	1857	DVL3
OBS_BC_211222	V2LHS_198523	29.99	31.13	10663	CXCR6
OBS_BC_211222	V2LHS_198523	28.24	16.62	10663	CXCR6
OBS_BC_211226	V2LHS_133399	8.75	8	3660	IRF2
OBS_BC_211226	V2LHS_133399	8.2	3.56	3660	IRF2
OBS_BC_211231	V2LHS_169889	71.93	73.21	5207	PFKFB1
OBS_BC_211231	V2LHS_169889	71.76	60.12	5207	PFKFB1
OBS_BC_211233	V2LHS_14925	22.3	26.67	871	SERPINH1
OBS_BC_211234	V2LHS_135415	6.36	6.84	51335	NGRN
OBS_BC_211234	V2LHS_135415	4.78	4.78	51335	NGRN
OBS_BC_211236	V2LHS_41302	71.22	79.64	9077	DIRAS3
OBS_BC_211239	V2LHS_209917	85.38	92.56	10280	OPRS1
OBS_BC_211239	V2LHS_209917	83.22	86.12	10280	OPRS1
OBS_BC_211244	V2LHS_253423	33.42	39.65	4736	RPL10A
OBS_BC_211244	V2LHS_253423	32.64	23.79	4736	RPL10A
OBS_BC_211245	V2LHS_133400	71.06	63.9	3660	IRF2
OBS_BC_211245	V2LHS_133400	70	34.38	3660	IRF2
OBS_BC_211248	V2LHS_251819	17.18	61.77	10530	RIG
OBS_BC_211249	V2LHS_53091	30.57	49.69	8850	PCAF
OBS_BC_211249	V2LHS_53091	29.78	48.12	8850	PCAF
OBS_BC_211250	V2LHS_218506	27.39	54.33	55070	DET1
OBS_BC_211250	V2LHS_218506	26.64	36.33	55070	DET1
OBS_BC_211261	V2LHS_229535	62.51	78.46	117285	DEFB118
OBS_BC_211261	V2LHS_229535	47.26	48.36	117285	DEFB118
OBS_BC_211262	V2LHS_132062	23.19	39.47	2959	GTF2B
OBS_BC_211262	V2LHS_132062	21.08	38.78	2959	GTF2B
OBS_BC_211268	V2LHS_15306	35.16	71.88	23637	RABGAP1
OBS_BC_211268	V2LHS_15306	28.63	59.29	23637	RABGAP1
OBS_BC_211269	V2LHS_223340	27.07	24.37	5436	POLR2G
OBS_BC_211269	V2LHS_223340	25.18	17.19	5436	POLR2G
OBS_BC_211273	V2LHS_67837	8.69	2.98	9513	FXR2
OBS_BC_211273	V2LHS_67837	8.51	2.3	9513	FXR2
OBS_BC_211282	V2LHS_193099	32.23	42.63	11219, 55559	TREX2, UCHL5IP
OBS_BC_211282	V2LHS_193099	29.76	34.55	11219, 55559	TREX2, UCHL5IP
OBS_BC_211286	V2LHS_275637	97.16	53.07	54960	GEMIN8
OBS_BC_211286	V2LHS_275637	96.86	49.41	54960	GEMIN8
OBS_BC_211288	V2LHS_231279	26.29	69.98	285	ANGPT2
OBS_BC_211288	V2LHS_231279	25.61	66.42	285	ANGPT2
OBS_BC_211291	V2LHS_231296	37.11	60.62	51003	MED31
OBS_BC_211291	V2LHS_231296	35.09	48.8	51003	MED31
OBS_BC_211293	V2LHS_172862	20.59	99.8	1407	CRY1
OBS_BC_211293	V2LHS_172862	19.33	99.78	1407	CRY1
OBS_BC_211297	V2LHS_240466	94.11	82.3	55529	TMEM55A
OBS_BC_211297	V2LHS_240466	93.42	81.37	55529	TMEM55A
OBS_BC_211299	V2LHS_158551	12.31	6.37	28316	CDH20
OBS_BC_211299	V2LHS_158551	8.94	3.1	28316	CDH20
OBS_BC_211304	V2LHS_16575	19.47	82.93	8813	DPM1
OBS_BC_211304	V2LHS_16575	18.38	69.51	8813	DPM1
OBS_BC_211305	V2LHS_172026	93.77	95.69	7479	WNT8B
OBS_BC_211306	V2LHS_36245	15.71	40.63	9227	LRAT
OBS_BC_211306	V2LHS_36245	14.19	38.08	9227	LRAT
OBS_BC_211310	V2LHS_284613	77.43	94.38	11260	XPOT
OBS_BC_211310	V2LHS_284613	69.18	75.89	11260	XPOT
OBS_BC_211312	V2LHS_12555	66.53	94.95	10686	CLDN16
OBS_BC_211312	V2LHS_12555	62.25	84.14	10686	CLDN16
OBS_BC_211313	V2LHS_64314	39.6	72.35	1072	CFL1
OBS_BC_211316	V2LHS_13654	80.55	77.37	57520	HECW2
OBS_BC_211316	V2LHS_13654	78.65	72.21	57520	HECW2
OBS_BC_211322	V2LHS_30495	81.3	83.56	26276	VPS33B
OBS_BC_211322	V2LHS_30495	76.08	77.56	26276	VPS33B
OBS_BC_211323	V2LHS_59479	58.11	57.93	170575	GIMAP1
OBS_BC_211326	V2LHS_131903	1.02	3.99	2647	BLOC1S1
OBS_BC_211326	V2LHS_131903	0.76	2.09	2647	BLOC1S1
OBS_BC_211327	V2LHS_172595	43.65	68.59	8324	FZD7
OBS_BC_211327	V2LHS_172595	37.2	55.47	8324	FZD7
OBS_BC_211329	V2LHS_37878	21.9	74.76	3037	HAS2
OBS_BC_211329	V2LHS_37878	17.42	52.72	3037	HAS2
OBS_BC_211334	V2LHS_158021	48.02	22.26	79884	MAP9
OBS_BC_211334	V2LHS_158021	47.13	21.82	79884	MAP9
OBS_BC_211336	V2LHS_216330	94.33	97.65	54734	RAB39
OBS_BC_211336	V2LHS_216330	92.52	88.18	54734	RAB39
OBS_BC_211337	V2LHS_92148	7.44	75.55	-	-
OBS_BC_211337	V2LHS_92148	5.26	49.63	-	-
OBS_BC_211341	V2LHS_210889	34.11	32.32	6844	VAMP2
OBS_BC_211341	V2LHS_210889	30.94	32.06	6844	VAMP2
OBS_BC_211348	V2LHS_51310	89.29	98.34	56934	CA10
OBS_BC_211348	V2LHS_51310	88.2	98.21	56934	CA10
OBS_BC_211349	V2LHS_44226	74.52	82.79	169792	GLIS3
OBS_BC_211349	V2LHS_44226	73.32	81.55	169792	GLIS3
OBS_BC_211354	V2LHS_232180	58.31	40.81	10890	RAB10
OBS_BC_211354	V2LHS_232180	46.74	38.76	10890	RAB10
OBS_BC_211366	V2LHS_151300	14.94	38.7	1890	TYMP
OBS_BC_211366	V2LHS_151300	14.74	30.52	1890	TYMP
OBS_BC_211372	V2LHS_11821	80.41	80.82	63967	CLSPN
OBS_BC_211375	V2LHS_28646	16.72	16.87	23456	ABCB10
OBS_BC_211375	V2LHS_28646	15.27	9.08	23456	ABCB10
OBS_BC_211382	V2LHS_153686	27.9	47.05	6839	SUV39H1
OBS_BC_211382	V2LHS_153686	25.85	31.74	6839	SUV39H1
OBS_BC_211385	V2LHS_218648	44.13	33.55	10206, 283518	TRIM13, KCNRG
OBS_BC_211385	V2LHS_218648	41.73	22.08	10206, 283518	TRIM13, KCNRG
OBS_BC_211388	V2LHS_284998	73.41	64.54	49861	CLDN20
OBS_BC_211388	V2LHS_284998	73.31	63.88	49861	CLDN20
OBS_BC_211389	V2LHS_135480	5.85	11.22	55686	MREG
OBS_BC_211389	V2LHS_135480	4.15	5.44	55686	MREG
OBS_BC_211393	V2LHS_254308	39.62	40.71	10613	ERLIN1
OBS_BC_211393	V2LHS_254308	38.11	34.37	10613	ERLIN1
OBS_BC_211408	V2LHS_33766	87.34	98.91	8350	HIST1H3A
OBS_BC_211408	V2LHS_33766	86.34	97.59	8350	HIST1H3A
OBS_BC_211410	V2LHS_221327	30.54	74.57	5537	PPP6C
OBS_BC_211425	V2LHS_254422	56.88	73.58	4676	NAP1L4
OBS_BC_211426	V2LHS_170126	3.8	3.51	5355	PLP2
OBS_BC_211426	V2LHS_170126	1.5	0.08	5355	PLP2
OBS_BC_211429	V2LHS_196451	32.89	77.07	10630	PDPN
OBS_BC_211429	V2LHS_196451	31.5	54.07	10630	PDPN
OBS_BC_211432	V2LHS_154400	76.64	90.44	54108	CHRAC1
OBS_BC_211432	V2LHS_154400	75.16	78.82	54108	CHRAC1
OBS_BC_211435	V2LHS_159296	52.99	21.74	84650	EBPL
OBS_BC_211435	V2LHS_159296	50.19	14.25	84650	EBPL
OBS_BC_211437	V2LHS_190093	35.56	58.81	5504	PPP1R2
OBS_BC_211437	V2LHS_190093	34.35	48.09	5504	PPP1R2
OBS_BC_211440	V2LHS_140402	45.03	83.86	157740	LOC157740
OBS_BC_211440	V2LHS_140402	42.75	72.75	157740	LOC157740
OBS_BC_211442	V2LHS_44425	89.11	65.42	166379	BBS12
OBS_BC_211442	V2LHS_44425	88.49	51.17	166379	BBS12
OBS_BC_211444	V2LHS_207574	47.21	70.14	10687	PNMA2
OBS_BC_211444	V2LHS_207574	43.49	64.98	10687	PNMA2
OBS_BC_211452	V2LHS_32802	4.22	1.26	8435	SOAT2
OBS_BC_211455	V2LHS_151429	29.44	94.96	2039	EPB49
OBS_BC_211455	V2LHS_151429	27.61	88.68	2039	EPB49
OBS_BC_211463	V2LHS_237760	80.61	27.1	6157, 389435	RPL27A, hCG_21078
OBS_BC_211463	V2LHS_237760	79.79	19.36	6157, 389435	RPL27A, hCG_21078
OBS_BC_211468	V2LHS_137634	77.8	37.24	81608	FIP1L1
OBS_BC_211468	V2LHS_137634	72.91	35.53	81608	FIP1L1
OBS_BC_211469	V2LHS_177575	33.4	43.31	94056	SYAP1
OBS_BC_211469	V2LHS_177575	31.73	38.97	94056	SYAP1
OBS_BC_211488	V2LHS_150704	51.64	44.51	1272	CNTN1
OBS_BC_211488	V2LHS_150704	46.5	43.27	1272	CNTN1
OBS_BC_211492	V2LHS_23977	79.48	83.7	8650	NUMB
OBS_BC_211492	V2LHS_23977	78.47	64.04	8650	NUMB
OBS_BC_211495	V2LHS_194798	17.26	21.33	23162	MAPK8IP3
OBS_BC_211495	V2LHS_194798	15.92	10.43	23162	MAPK8IP3
OBS_BC_211503	V2LHS_217661	20.36	10.71	94122	SYTL5
OBS_BC_211503	V2LHS_217661	19.89	5.2	94122	SYTL5
OBS_BC_211504	V2LHS_60848	73.26	82.21	58477	SRPRB
OBS_BC_211504	V2LHS_60848	63.43	81.46	58477	SRPRB
OBS_BC_211508	V2LHS_172020	91.83	45.02	7474	WNT5A
OBS_BC_211508	V2LHS_172020	90.47	41.8	7474	WNT5A
OBS_BC_211513	V2LHS_133575	59.16	46.78	3726	JUNB
OBS_BC_211514	V2LHS_88485	49.49	41.19	3274	HRH2
OBS_BC_211514	V2LHS_88485	40.51	35.71	3274	HRH2
OBS_BC_211516	V2LHS_262951	96.9	15.24	10055	SAE1
OBS_BC_211516	V2LHS_262951	95.99	14.96	10055	SAE1
OBS_BC_211518	V2LHS_100112	33.6	92.97	157506	RDH10
OBS_BC_211518	V2LHS_100112	29.18	91.29	157506	RDH10
OBS_BC_211519	V2LHS_238645	85.52	38.28	1841, 6156	DTYMK, RPL30
OBS_BC_211519	V2LHS_238645	80.64	31.9	1841, 6156	DTYMK, RPL30
OBS_BC_211522	V2LHS_86987	20.22	14.67	-	-
OBS_BC_211522	V2LHS_86987	19.4	13.98	-	-
OBS_BC_211524	V2LHS_239492	87.96	90.65	5468	PPARG
OBS_BC_211524	V2LHS_239492	87.18	89.93	5468	PPARG
OBS_BC_211530	V2LHS_14862	12.96	9.46	93058	COQ10A
OBS_BC_211530	V2LHS_14862	10.08	5.78	93058	COQ10A
OBS_BC_211561	V2LHS_218161	55.87	76.58	55329	MNS1
OBS_BC_211561	V2LHS_218161	54.79	69.97	55329	MNS1
OBS_BC_211573	V2LHS_252787	68.17	74.52	10614	HEXIM1
OBS_BC_211573	V2LHS_252787	59.79	64.09	10614	HEXIM1
OBS_BC_211582	V2LHS_257337	70.25	90.79	10945	KDELR1
OBS_BC_211582	V2LHS_257337	68.21	88.24	10945	KDELR1
OBS_BC_211591	V2LHS_41219	96.61	12.52	317702	VN1R3
OBS_BC_211591	V2LHS_41219	96.33	10.98	317702	VN1R3
OBS_BC_211594	V2LHS_243808	42.49	89.88	3796	KIF2A
OBS_BC_211594	V2LHS_243808	39.91	84.85	3796	KIF2A
OBS_BC_211597	V2LHS_46777	27.41	33.4	9038	TAAR5
OBS_BC_211597	V2LHS_46777	27.14	27.28	9038	TAAR5
OBS_BC_211605	V2LHS_203111	40.68	89.32	4214	MAP3K1
OBS_BC_211618	V2LHS_187951	65.82	56.32	79799	UGT2A3
OBS_BC_211618	V2LHS_187951	64.43	42.13	79799	UGT2A3
OBS_BC_211624	V2LHS_241748	12.9	17.81	132946	ARL9
OBS_BC_211624	V2LHS_241748	6.31	12.31	132946	ARL9
OBS_BC_211632	V2LHS_160346	57.01	77.26	8555	CDC14B
OBS_BC_211632	V2LHS_160346	55.85	61.92	8555	CDC14B
OBS_BC_211643	V2LHS_199353	79.05	68.07	7871	SLMAP
OBS_BC_211645	V2LHS_36129	67.99	59.02	9249	DHRS3
OBS_BC_211645	V2LHS_36129	65.8	44.98	9249	DHRS3
OBS_BC_211651	V2LHS_228950	74.66	75.05	5238	PGM3
OBS_BC_211651	V2LHS_228950	67.17	68.99	5238	PGM3
OBS_BC_211654	V2LHS_170334	39.97	19.94	5514	PPP1R10
OBS_BC_211654	V2LHS_170334	36.17	14.74	5514	PPP1R10
OBS_BC_211659	V2LHS_246393	95.63	7.3	2620	GAS2
OBS_BC_211659	V2LHS_246393	94.96	5.4	2620	GAS2
OBS_BC_211672	V2LHS_51042	77.59	88.55	56937	PMEPA1
OBS_BC_211675	V2LHS_285128	9.06	26.38	124	ADH1A
OBS_BC_211676	V2LHS_150860	28.39	80.49	1368	CPM
OBS_BC_211676	V2LHS_150860	26.05	51.67	1368	CPM
OBS_BC_211693	V2LHS_176630	68.16	98.44	54675	CRLS1
OBS_BC_211693	V2LHS_176630	65.65	94.03	54675	CRLS1
OBS_BC_211700	V2LHS_171350	57.95	30.53	7099	TLR4
OBS_BC_211700	V2LHS_171350	56.41	20.44	7099	TLR4
OBS_BC_211701	V2LHS_228842	32.34	26.23	159	ADSS
OBS_BC_211709	V2LHS_62078	87.25	87.49	1673, 728454	DEFB4, DEFB4P
OBS_BC_211713	V2LHS_14430	75.13	22.01	-	-
OBS_BC_211713	V2LHS_14430	74.74	13.67	-	-
OBS_BC_211714	V2LHS_204426	99.65	94.11	146310	RNF151
OBS_BC_211714	V2LHS_204426	99.14	90.05	146310	RNF151
OBS_BC_211720	V2LHS_74033	18.39	21.04	9734	HDAC9
OBS_BC_211720	V2LHS_74033	17.46	15.06	9734	HDAC9
OBS_BC_211729	V2LHS_185075	96.25	94.76	8570	KHSRP
OBS_BC_211744	V2LHS_82529	37.39	15.38	3099	HK2
OBS_BC_211744	V2LHS_82529	36.52	6.07	3099	HK2
OBS_BC_211745	V2LHS_221662	29.31	92.7	5176	SERPINF1
OBS_BC_211748	V2LHS_60346	66.02	60.96	9655	SOCS5
OBS_BC_211748	V2LHS_60346	61.39	55.68	9655	SOCS5
OBS_BC_211759	V2LHS_19387	85.83	80.41	5649	RELN
OBS_BC_211759	V2LHS_19387	78.03	62.36	5649	RELN
OBS_BC_211760	V2LHS_133642	36.66	56.33	3766	KCNJ10
OBS_BC_211761	V2LHS_33383	32.28	66.41	169026	SLC30A8
OBS_BC_211775	V2LHS_6055	45.44	27.71	-	-
OBS_BC_211775	V2LHS_6055	40.37	15.95	-	-
OBS_BC_211779	V2LHS_20445	51.88	41.25	144715	RAD9B
OBS_BC_211779	V2LHS_20445	46.73	36.22	144715	RAD9B
OBS_BC_211785	V2LHS_150568	53.51	34.57	1114	CHGB
OBS_BC_211785	V2LHS_150568	50.58	25.06	1114	CHGB
OBS_BC_211786	V2LHS_68171	78.86	24.55	11174	ADAMTS6
OBS_BC_211786	V2LHS_68171	78.71	16.31	11174	ADAMTS6
OBS_BC_211789	V2LHS_154118	84.17	70.12	120	ADD3
OBS_BC_211789	V2LHS_154118	83.01	67.7	120	ADD3
OBS_BC_211790	V2LHS_93212	10.97	8.58	203	AK1
OBS_BC_211790	V2LHS_93212	7.35	5.98	203	AK1
OBS_BC_211791	V2LHS_28381	52.77	27.78	9296	ATP6V1F
OBS_BC_211791	V2LHS_28381	45.67	25.75	9296	ATP6V1F
OBS_BC_211795	V2LHS_100701	86.35	97.18	27163	NAAA
OBS_BC_211795	V2LHS_100701	85.69	82.92	27163	NAAA
OBS_BC_211796	V2LHS_258729	11.74	13.16	128338	TMEM77
OBS_BC_211796	V2LHS_258729	10.84	4.79	128338	TMEM77
OBS_BC_211798	V2LHS_229810	49.08	33.18	374462, 100129165	PTPRQ, LOC100129165
OBS_BC_211798	V2LHS_229810	44.4	19.04	374462, 100129165	PTPRQ, LOC100129165
OBS_BC_211800	V2LHS_46831	93.29	67.72	9034, 727811	CCRL2, LOC727811
OBS_BC_211800	V2LHS_46831	91.96	59.7	9034, 727811	CCRL2, LOC727811
OBS_BC_211809	V2LHS_174695	12.8	12.84	93664	CADPS2
OBS_BC_211809	V2LHS_174695	9.85	6.54	93664	CADPS2
OBS_BC_211817	V2LHS_252890	94.62	87.72	120114	FAT3
OBS_BC_211817	V2LHS_252890	94.3	71.8	120114	FAT3
OBS_BC_211819	V2LHS_66511	74.33	69.63	10218	ANGPTL7
OBS_BC_211821	V2LHS_61636	18.55	65.33	203107	LOC203107
OBS_BC_211821	V2LHS_61636	16.19	64.55	203107	LOC203107
OBS_BC_211822	V2LHS_131896	64.35	18.08	2646	GCKR
OBS_BC_211822	V2LHS_131896	58.42	16.79	2646	GCKR
OBS_BC_211829	V2LHS_189086	11.83	14.06	1302	COL11A2
OBS_BC_211829	V2LHS_189086	10.09	8.64	1302	COL11A2
OBS_BC_211830	V2LHS_63581	45.45	72.82	3419	IDH3A
OBS_BC_211832	V2LHS_225208	16.95	70.86	116511	MAS1L
OBS_BC_211833	V2LHS_170489	43.31	92.08	5596	MAPK4
OBS_BC_211833	V2LHS_170489	42.13	86.26	5596	MAPK4
OBS_BC_211834	V2LHS_199342	62.8	95.55	27030	MLH3
OBS_BC_211834	V2LHS_199342	59.43	94.45	27030	MLH3
OBS_BC_211836	V2LHS_65479	95.12	81.68	29920	PYCR2
OBS_BC_211836	V2LHS_65479	93.97	76.97	29920	PYCR2
OBS_BC_211838	V2LHS_97275	28.66	53.39	51011, 151313	FAHD2A, FAHD2B
OBS_BC_211838	V2LHS_97275	26.81	41.34	51011, 151313	FAHD2A, FAHD2B
OBS_BC_211844	V2LHS_99375	80.92	95.48	83417	FCRL4
OBS_BC_211844	V2LHS_99375	80.35	72.08	83417	FCRL4
OBS_BC_211851	V2LHS_81245	59.61	53.84	60412	EXOC4
OBS_BC_211851	V2LHS_81245	51.3	43.95	60412	EXOC4
OBS_BC_211854	V2LHS_93894	86.98	73.39	6262	RYR2
OBS_BC_211854	V2LHS_93894	83.5	70.53	6262	RYR2
OBS_BC_211856	V2LHS_240795	64.85	17.89	8509	NDST2
OBS_BC_211856	V2LHS_240795	56.87	17.31	8509	NDST2
OBS_BC_211857	V2LHS_93663	8.74	37.1	1641	DCX
OBS_BC_211857	V2LHS_93663	8.72	21.86	1641	DCX
OBS_BC_211860	V2LHS_23648	43.02	71.11	8690	JRKL
OBS_BC_211860	V2LHS_23648	39.88	61.24	8690	JRKL
OBS_BC_211863	V2LHS_45844	64.17	43.35	54716	SLC6A20
OBS_BC_211863	V2LHS_45844	63.31	23.96	54716	SLC6A20
OBS_BC_211872	V2LHS_235484	41.33	81.51	8487	SIP1
OBS_BC_211874	V2LHS_176728	45.99	37.97	56061	UBFD1
OBS_BC_211874	V2LHS_176728	45.81	13.89	56061	UBFD1
OBS_BC_211884	V2LHS_178858	69.65	32.98	25914	RTTN
OBS_BC_211884	V2LHS_178858	69.28	23.03	25914	RTTN
OBS_BC_211897	V2LHS_214843	93.3	69.05	5969	REGL
OBS_BC_211897	V2LHS_214843	92.82	53.21	5969	REGL
OBS_BC_211898	V2LHS_31774	10.87	15.47	6280	S100A9
OBS_BC_211906	V2LHS_112994	59.32	35.43	1111	CHEK1
OBS_BC_211906	V2LHS_112994	58.15	28.64	1111	CHEK1
OBS_BC_211908	V2LHS_198172	8.66	32.75	27240	SIT1
OBS_BC_211908	V2LHS_198172	0.04	17.73	27240	SIT1
OBS_BC_211909	V2LHS_58819	30.73	79.87	57332	CBX8
OBS_BC_211909	V2LHS_58819	27.11	72.11	57332	CBX8
OBS_BC_211910	V2LHS_51641	97.52	69.39	53820	DSCR6
OBS_BC_211918	V2LHS_176969	48.48	66.56	80011	NIP30
OBS_BC_211918	V2LHS_176969	47.44	31.95	80011	NIP30
OBS_BC_211921	V2LHS_223453	32.15	54.66	84988	PPP1R16A
OBS_BC_211921	V2LHS_223453	27.74	44.39	84988	PPP1R16A
OBS_BC_211927	V2LHS_115304	76.38	92.88	51449	PCYOX1
OBS_BC_211927	V2LHS_115304	74.82	75.47	51449	PCYOX1
OBS_BC_211931	V2LHS_158443	43.83	14.97	80724	ACAD10
OBS_BC_211932	V2LHS_41900	42.39	86.83	256536	TCERG1L
OBS_BC_211932	V2LHS_41900	40.58	74.73	256536	TCERG1L
OBS_BC_211936	V2LHS_33288	35.19	33.32	317705	VN1R5
OBS_BC_211936	V2LHS_33288	33.84	31.58	317705	VN1R5
OBS_BC_211937	V2LHS_196413	10.74	7.36	10235	RASGRP2
OBS_BC_211937	V2LHS_196413	10.05	2.21	10235	RASGRP2
OBS_BC_211940	V2LHS_278188	85.83	62.54	414	ARSD
OBS_BC_211940	V2LHS_278188	84.73	52.15	414	ARSD
OBS_BC_211941	V2LHS_43487	67.67	77.84	1773	DNASE1
OBS_BC_211941	V2LHS_43487	66.01	68.86	1773	DNASE1
OBS_BC_211949	V2LHS_105434	49.69	32.66	389873	LOC389873
OBS_BC_211949	V2LHS_105434	45.85	29.9	389873	LOC389873
OBS_BC_211958	V2LHS_97458	26.23	51.07	51652	VPS24
OBS_BC_211958	V2LHS_97458	25.88	33.78	51652	VPS24
OBS_BC_211960	V2LHS_214395	36.89	82.27	221393	GPR115
OBS_BC_211963	V2LHS_214242	46.31	77.8	63967	CLSPN
OBS_BC_211963	V2LHS_214242	37.96	77.79	63967	CLSPN
OBS_BC_211968	V2LHS_218524	86.48	92.77	51203	NUSAP1
OBS_BC_211968	V2LHS_218524	85.66	73.87	51203	NUSAP1
OBS_BC_211973	V2LHS_116180	75.21	76.69	64849	SLC13A3
OBS_BC_211973	V2LHS_116180	73.35	73.64	64849	SLC13A3
OBS_BC_211988	V2LHS_35536	58.31	52.59	9342	SNAP29
OBS_BC_211990	V2LHS_58229	78.89	64.33	57396	CLK4
OBS_BC_211990	V2LHS_58229	70.42	48.9	57396	CLK4
OBS_BC_211992	V2LHS_228227	21.05	45.84	81579	PLA2G12A
OBS_BC_211993	V2LHS_90945	57.87	78.58	10800	CYSLTR1
OBS_BC_211993	V2LHS_90945	50.57	68.62	10800	CYSLTR1
OBS_BC_211997	V2LHS_161640	22.14	56.44	23380	SRGAP2
OBS_BC_211997	V2LHS_161640	21.65	51.99	23380	SRGAP2
OBS_BC_212011	V2LHS_221869	68.27	39.23	55193	PBRM1
OBS_BC_212011	V2LHS_221869	61.45	38.64	55193	PBRM1
OBS_BC_212013	V2LHS_113115	8.8	4	1230	CCR1
OBS_BC_212016	V2LHS_50571	47.79	40.47	9637	FEZ2
OBS_BC_212016	V2LHS_50571	46.7	31.89	9637	FEZ2
OBS_BC_212017	V2LHS_61460	88.7	57.19	157922	CAMSAP1
OBS_BC_212017	V2LHS_61460	87.35	43.34	157922	CAMSAP1
OBS_BC_212020	V2LHS_21810	86.08	99.04	221656	AOF1
OBS_BC_212020	V2LHS_21810	78.45	95.39	221656	AOF1
OBS_BC_212031	V2LHS_63462	80.14	73.39	9618	TRAF4
OBS_BC_212035	V2LHS_64878	55.29	34.34	940	CD28
OBS_BC_212042	V2LHS_51797	60.76	30	26528	DAZAP1
OBS_BC_212042	V2LHS_51797	59.44	28.04	26528	DAZAP1
OBS_BC_212049	V2LHS_253566	77.92	94.37	10534	SSSCA1
OBS_BC_212049	V2LHS_253566	71.69	83.26	10534	SSSCA1
OBS_BC_212053	V2LHS_218807	96.95	65.51	7287	TULP1
OBS_BC_212053	V2LHS_218807	96.89	51.35	7287	TULP1
OBS_BC_212055	V2LHS_98497	25.6	23.63	64794	DDX31
OBS_BC_212056	V2LHS_68586	92.19	77.96	91647	ATPAF2
OBS_BC_212056	V2LHS_68586	90.18	66.81	91647	ATPAF2
OBS_BC_212059	V2LHS_173612	81.71	60.91	54884	RETSAT
OBS_BC_212059	V2LHS_173612	77.54	37.37	54884	RETSAT
OBS_BC_212060	V2LHS_212690	88.88	42.46	27156	RTDR1
OBS_BC_212070	V2LHS_190661	95.16	79.4	1470	CST2
OBS_BC_212072	V2LHS_70824	35.1	22.23	170691	ADAMTS17
OBS_BC_212072	V2LHS_70824	31.96	18.56	170691	ADAMTS17
OBS_BC_212073	V2LHS_33545	22.64	31.28	8973	CHRNA6
OBS_BC_212073	V2LHS_33545	22.02	28.75	8973	CHRNA6
OBS_BC_212075	V2LHS_42358	80.34	87.78	2746, 2747	GLUD1, GLUD2
OBS_BC_212075	V2LHS_42358	70.95	75.7	2746, 2747	GLUD1, GLUD2
OBS_BC_212077	V2LHS_36178	77	93.44	9244	CRLF1
OBS_BC_212077	V2LHS_36178	77	87.78	9244	CRLF1
OBS_BC_212081	V2LHS_20619	99.37	88.15	-	-
OBS_BC_212081	V2LHS_20619	98.57	80.33	-	-
OBS_BC_212094	V2LHS_59865	49.57	64.88	28972	SPCS1
OBS_BC_212094	V2LHS_59865	32.92	62.51	28972	SPCS1
OBS_BC_212096	V2LHS_173897	35.07	27	55644	OSGEP
OBS_BC_212098	V2LHS_115307	40.96	72.02	51449	PCYOX1
OBS_BC_212099	V2LHS_222494	3.03	76.05	2974	GUCY1B2
OBS_BC_212103	V2LHS_204186	13.15	54.01	284110	GSDM1
OBS_BC_212103	V2LHS_204186	12.14	48.94	284110	GSDM1
OBS_BC_212104	V2LHS_23737	13.23	11.08	8673	VAMP8
OBS_BC_212104	V2LHS_23737	12.89	0.6	8673	VAMP8
OBS_BC_212106	V2LHS_216045	49.48	51.79	24147	FJX1
OBS_BC_212106	V2LHS_216045	39.71	41.69	24147	FJX1
OBS_BC_212108	V2LHS_58989	45.29	49.61	5157	PDGFRL
OBS_BC_212108	V2LHS_58989	42.17	39.26	5157	PDGFRL
OBS_BC_212110	V2LHS_77839	49.15	30.73	11019	LIAS
OBS_BC_212110	V2LHS_77839	42.61	28.81	11019	LIAS
OBS_BC_212111	V2LHS_57281	43.14	15.48	5790	PTPRCAP
OBS_BC_212111	V2LHS_57281	40.27	9.94	5790	PTPRCAP
OBS_BC_212116	V2LHS_14818	66.58	32.11	8600	TNFSF11
OBS_BC_212116	V2LHS_14818	65.62	28.72	8600	TNFSF11
OBS_BC_212117	V2LHS_115519	27.62	16.94	51199	NIN
OBS_BC_212117	V2LHS_115519	26.21	15.28	51199	NIN
OBS_BC_212120	V2LHS_41022	43.2	48.86	9113	LATS1
OBS_BC_212120	V2LHS_41022	35.62	46.82	9113	LATS1
OBS_BC_212136	V2LHS_56949	22.79	52.24	6432	SFRS7
OBS_BC_212136	V2LHS_56949	20.46	45.72	6432	SFRS7
OBS_BC_212138	V2LHS_239574	56.15	31.44	367	AR
OBS_BC_212138	V2LHS_239574	48.16	24.04	367	AR
OBS_BC_212146	V2LHS_169774	24.06	39.11	5151	PDE8A
OBS_BC_212150	V2LHS_72903	92.31	59.38	25855	BRMS1
OBS_BC_212150	V2LHS_72903	88.27	56.47	25855	BRMS1
OBS_BC_212153	V2LHS_262260	93.86	73.79	24137	KIF4A
OBS_BC_212153	V2LHS_262260	93.65	73.59	24137	KIF4A
OBS_BC_212159	V2LHS_63729	81.23	49.23	4915	NTRK2
OBS_BC_212183	V2LHS_42702	89.17	89.83	6804	STX1A
OBS_BC_212183	V2LHS_42702	87.78	89.29	6804	STX1A
OBS_BC_212195	V2LHS_63197	4.94	12.63	337876	CHSY3
OBS_BC_212195	V2LHS_63197	1.72	7.75	337876	CHSY3
OBS_BC_212197	V2LHS_51799	44.42	57.67	26528	DAZAP1
OBS_BC_212200	V2LHS_244934	59.19	58.91	151473	SLC16A14
OBS_BC_212200	V2LHS_244934	58.37	48.64	151473	SLC16A14
OBS_BC_212201	V2LHS_209808	26.02	23.3	23474	ETHE1
OBS_BC_212201	V2LHS_209808	25.05	19.49	23474	ETHE1
OBS_BC_212203	V2LHS_69603	52.38	12.01	7525	YES1
OBS_BC_212205	V2LHS_152043	53.87	45.68	4605	MYBL2
OBS_BC_212205	V2LHS_152043	45.12	35.41	4605	MYBL2
OBS_BC_212210	V2LHS_245188	69.23	99.54	9085, 9426, 203611, 253175	CDY1, CDY2A, CDY2B, CDY1B
OBS_BC_212210	V2LHS_245188	67.43	97.45	9085, 9426, 203611, 253175	CDY1, CDY2A, CDY2B, CDY1B
OBS_BC_212213	V2LHS_137178	78.02	47.65	80218	NAT13
OBS_BC_212217	V2LHS_46926	23.15	46.05	9016	SLC25A14
OBS_BC_212217	V2LHS_46926	20.96	35.74	9016	SLC25A14
OBS_BC_212219	V2LHS_130645	25.13	43.96	6955, 6964	TRA@, TRD@
OBS_BC_212219	V2LHS_130645	18.4	42.5	6955, 6964	TRA@, TRD@
OBS_BC_212233	V2LHS_217779	89.58	83.54	26284	ERAL1
OBS_BC_212237	V2LHS_132091	43.63	8.28	2972	BRF1
OBS_BC_212237	V2LHS_132091	43.38	2.32	2972	BRF1
OBS_BC_212241	V2LHS_200399	82.69	50.2	54737	MPHOSPH8
OBS_BC_212241	V2LHS_200399	82.34	45.98	54737	MPHOSPH8
OBS_BC_212248	V2LHS_217436	55.95	61.12	6672, 645292, 729858, 100132863	SP100, HMG1L6, LOC729858, LOC100132863
OBS_BC_212248	V2LHS_217436	52.16	60.82	6672, 645292, 729858, 100132863	SP100, HMG1L6, LOC729858, LOC100132863
OBS_BC_212250	V2LHS_221674	88.78	69.12	5610	EIF2AK2
OBS_BC_212255	V2LHS_281542	26.38	14.94	28984	C13orf15
OBS_BC_212255	V2LHS_281542	24.93	12.99	28984	C13orf15
OBS_BC_212257	V2LHS_193059	81.56	99.64	29883, 100128883	CNOT7, LOC100128883
OBS_BC_212257	V2LHS_193059	76.85	98	29883, 100128883	CNOT7, LOC100128883
OBS_BC_212261	V2LHS_263160	5.06	89.79	6434	SFRS10
OBS_BC_212261	V2LHS_263160	4.55	83.91	6434	SFRS10
OBS_BC_212262	V2LHS_263121	74.41	88.82	11142	PKIG
OBS_BC_212262	V2LHS_263121	63.37	88.25	11142	PKIG
OBS_BC_212266	V2LHS_16392	19.04	55.7	9073	CLDN8
OBS_BC_212266	V2LHS_16392	17.17	51.02	9073	CLDN8
OBS_BC_212267	V2LHS_44095	66.49	85.83	170392	OIT3
OBS_BC_212269	V2LHS_86498	52.58	81.18	29766	TMOD3
OBS_BC_212270	V2LHS_269035	58.75	71.58	51025, 79585	Magmas, CORO7
OBS_BC_212270	V2LHS_269035	57.67	68.68	51025, 79585	Magmas, CORO7
OBS_BC_212276	V2LHS_196634	58.54	92.71	10152	ABI2
OBS_BC_212276	V2LHS_196634	56.53	85.58	10152	ABI2
OBS_BC_212284	V2LHS_203342	80.32	70.7	27039	PKD2L2
OBS_BC_212284	V2LHS_203342	79.56	56.45	27039	PKD2L2
OBS_BC_212295	V2LHS_151164	19.45	16.75	1675	CFD
OBS_BC_212295	V2LHS_151164	19.36	6.01	1675	CFD
OBS_BC_212301	V2LHS_251227	76.56	54.87	10581	IFITM2
OBS_BC_212303	V2LHS_223203	84.65	86.23	84910	TMEM87B
OBS_BC_212303	V2LHS_223203	80.11	80.48	84910	TMEM87B
OBS_BC_212306	V2LHS_98044	35.86	18.05	8649	MAP2K1IP1
OBS_BC_212306	V2LHS_98044	35.77	15.61	8649	MAP2K1IP1
OBS_BC_212310	V2LHS_211667	99	42.02	10622, 100130769	POLR3G, LOC100130769
OBS_BC_212310	V2LHS_211667	98.21	24.83	10622, 100130769	POLR3G, LOC100130769
OBS_BC_212314	V2LHS_133645	27.17	70.75	3769	KCNJ13
OBS_BC_212317	V2LHS_285436	31.86	17.91	340205	TREML1
OBS_BC_212317	V2LHS_285436	28.1	9.14	340205	TREML1
OBS_BC_212322	V2LHS_56674	64.23	95.13	7016	TESK1
OBS_BC_212322	V2LHS_56674	46.61	92.29	7016	TESK1
OBS_BC_212331	V2LHS_80971	59.61	28.58	23305	ACSL6
OBS_BC_212340	V2LHS_178291	98.89	35.14	85456	TNKS1BP1
OBS_BC_212340	V2LHS_178291	98.72	27.87	85456	TNKS1BP1
OBS_BC_212349	V2LHS_170669	4.93	5.91	5682	PSMA1
OBS_BC_212349	V2LHS_170669	2.95	3.14	5682	PSMA1
OBS_BC_212351	V2LHS_245646	17.55	15.92	56922	MCCC1
OBS_BC_212351	V2LHS_245646	16.52	15.09	56922	MCCC1
OBS_BC_212355	V2LHS_247834	97.35	53	256302	MGC33894
OBS_BC_212359	V2LHS_195442	51.56	33.43	-	-
OBS_BC_212359	V2LHS_195442	50.59	30.03	-	-
OBS_BC_212367	V2LHS_220667	13.96	51.67	26610	ELP4
OBS_BC_212385	V2LHS_248408	60.74	82.34	1944	EFNA3
OBS_BC_212385	V2LHS_248408	60.53	80.74	1944	EFNA3
OBS_BC_212392	V2LHS_65033	6.06	6.06	-	-
OBS_BC_212392	V2LHS_65033	5.52	1.61	-	-
OBS_BC_212396	V2LHS_154961	70.1	92.52	54798	DCHS2
OBS_BC_212396	V2LHS_154961	69.72	89.27	54798	DCHS2
OBS_BC_212399	V2LHS_80461	75.63	78.81	23327	NEDD4L
OBS_BC_212399	V2LHS_80461	74.33	71.39	23327	NEDD4L
OBS_BC_212408	V2LHS_69359	58.94	60.09	8320	EOMES
OBS_BC_212408	V2LHS_69359	51.26	55.94	8320	EOMES
OBS_BC_212410	V2LHS_188097	53.76	55.31	6282, 56252	S100A11, YLPM1
OBS_BC_212410	V2LHS_188097	51.78	47.41	6282, 56252	S100A11, YLPM1
OBS_BC_212416	V2LHS_239426	10.31	8.29	2100	ESR2
OBS_BC_212416	V2LHS_239426	7.86	1.04	2100	ESR2
OBS_BC_212418	V2LHS_176962	46.08	35.22	80010	RMI1
OBS_BC_212418	V2LHS_176962	44.53	34.97	80010	RMI1
OBS_BC_212419	V2LHS_231553	73.49	69.65	5445	PON2
OBS_BC_212419	V2LHS_231553	73.36	47.35	5445	PON2
OBS_BC_212421	V2LHS_201353	59.17	93.82	51194, 100130733	IPO11, LOC100130733
OBS_BC_212421	V2LHS_201353	58.47	84.29	51194, 100130733	IPO11, LOC100130733
OBS_BC_212426	V2LHS_154184	58.2	42.69	10683	DLL3
OBS_BC_212426	V2LHS_154184	55.65	33.09	10683	DLL3
OBS_BC_212429	V2LHS_170854	43.09	82.36	5719	PSMD13
OBS_BC_212429	V2LHS_170854	41.51	78.66	5719	PSMD13
OBS_BC_212443	V2LHS_265023	65.88	25.16	1396	CRIP1
OBS_BC_212443	V2LHS_265023	65	22.26	1396	CRIP1
OBS_BC_212455	V2LHS_239187	1.65	11.68	7068	THRB
OBS_BC_212455	V2LHS_239187	0.52	2.25	7068	THRB
OBS_BC_212460	V2LHS_222891	62.93	78.94	55030	FBXO34
OBS_BC_212460	V2LHS_222891	46.82	61.73	55030	FBXO34
OBS_BC_212465	V2LHS_17544	79.09	85.08	2103	ESRRB
OBS_BC_212465	V2LHS_17544	71.42	54.18	2103	ESRRB
OBS_BC_212470	V2LHS_235012	6.35	7.6	3708	ITPR1
OBS_BC_212472	V2LHS_284981	23.44	74.37	2010	EMD
OBS_BC_212472	V2LHS_284981	23.08	73.86	2010	EMD
OBS_BC_212484	V2LHS_242572	87.26	92.52	1676	DFFA
OBS_BC_212485	V2LHS_90884	32.36	18.39	57572	DOCK6
OBS_BC_212485	V2LHS_90884	30.11	8.84	57572	DOCK6
OBS_BC_212486	V2LHS_132083	94.83	88.88	2969, 2970, 100093631	GTF2I, GTF2IP1, LOC100093631
OBS_BC_212486	V2LHS_132083	94.78	78.36	2969, 2970, 100093631	GTF2I, GTF2IP1, LOC100093631
OBS_BC_212499	V2LHS_224580	60.98	91.66	51440	HPCAL4
OBS_BC_212499	V2LHS_224580	53.3	87.63	51440	HPCAL4
OBS_BC_212502	V2LHS_72734	9.75	12.63	9775	EIF4A3
OBS_BC_212502	V2LHS_72734	7.23	1.7	9775	EIF4A3
OBS_BC_212503	V2LHS_61238	94.57	21.03	4287	ATXN3
OBS_BC_212503	V2LHS_61238	94.03	18.17	4287	ATXN3
OBS_BC_212507	V2LHS_249788	28.41	26.29	130560	SPATA3
OBS_BC_212507	V2LHS_249788	27.62	17.71	130560	SPATA3
OBS_BC_212512	V2LHS_283562	0.13	0.24	9425	CDYL
OBS_BC_212512	V2LHS_283562	0.12	0.1	9425	CDYL
OBS_BC_212517	V2LHS_222179	54.04	96.83	574	BAGE
OBS_BC_212517	V2LHS_222179	50.8	94.82	574	BAGE
OBS_BC_212523	V2LHS_286762	72.72	93.91	5098, 8641, 9708, 26025, 56097, 56098, 56099, 56100, 56101, 56102, 56103, 56104, 56105, 56106, 56107, 56108, 56109, 56110, 56111, 56112, 56113, 56114	PCDHGC3, PCDHGB4, PCDHGA8, PCDHGA12, PCDHGC5, PCDHGC4, PCDHGB7, PCDHGB6, PCDHGB5, PCDHGB3, PCDHGB2, PCDHGB1, PCDHGA11, PCDHGA10, PCDHGA9, PCDHGA7, PCDHGA6, PCDHGA5, PCDHGA4, PCDHGA3, PCDHGA2, PCDHGA1
OBS_BC_212523	V2LHS_286762	71.99	91.89	5098, 8641, 9708, 26025, 56097, 56098, 56099, 56100, 56101, 56102, 56103, 56104, 56105, 56106, 56107, 56108, 56109, 56110, 56111, 56112, 56113, 56114	PCDHGC3, PCDHGB4, PCDHGA8, PCDHGA12, PCDHGC5, PCDHGC4, PCDHGB7, PCDHGB6, PCDHGB5, PCDHGB3, PCDHGB2, PCDHGB1, PCDHGA11, PCDHGA10, PCDHGA9, PCDHGA7, PCDHGA6, PCDHGA5, PCDHGA4, PCDHGA3, PCDHGA2, PCDHGA1
OBS_BC_212528	V2LHS_235685	35.71	88.97	51310	SLC22A17
OBS_BC_212528	V2LHS_235685	33.58	87.63	51310	SLC22A17
OBS_BC_212529	V2LHS_179476	51.44	71.28	221895	JAZF1
OBS_BC_212530	V2LHS_27926	61.98	66.25	9497	SLC4A7
OBS_BC_212530	V2LHS_27926	57.07	55.18	9497	SLC4A7
OBS_BC_212531	V2LHS_155767	49	26.13	55715	DOK4
OBS_BC_212531	V2LHS_155767	48.62	24.43	55715	DOK4
OBS_BC_212532	V2LHS_87985	47.11	23.23	23682	RAB38
OBS_BC_212532	V2LHS_87985	44.49	16.29	23682	RAB38
OBS_BC_212534	V2LHS_195870	19.84	41.82	157310	PEBP4
OBS_BC_212534	V2LHS_195870	18.32	38.87	157310	PEBP4
OBS_BC_212535	V2LHS_150032	61.09	16.28	643	CXCR5
OBS_BC_212535	V2LHS_150032	57.01	13.4	643	CXCR5
OBS_BC_212537	V2LHS_220627	43.96	74.28	54474	KRT20
OBS_BC_212537	V2LHS_220627	43.7	52.58	54474	KRT20
OBS_BC_212544	V2LHS_234058	3.2	1.58	2941	GSTA4
OBS_BC_212547	V2LHS_23914	78.56	46.25	8661	EIF3A
OBS_BC_212551	V2LHS_67980	82.33	88.83	9474	ATG5
OBS_BC_212554	V2LHS_19606	21.1	25.67	22803	XRN2
OBS_BC_212554	V2LHS_19606	20.61	21.19	22803	XRN2
OBS_BC_212556	V2LHS_47858	45.75	85.26	8560	DEGS1
OBS_BC_212556	V2LHS_47858	42.79	79.86	8560	DEGS1
OBS_BC_212557	V2LHS_136849	12.21	20.43	80145	THOC7
OBS_BC_212557	V2LHS_136849	11.68	16.65	80145	THOC7
OBS_BC_212558	V2LHS_133785	62.92	98.27	3841	KPNA5
OBS_BC_212558	V2LHS_133785	60.09	92.55	3841	KPNA5
OBS_BC_212562	V2LHS_131432	12.86	92.93	5534	PPP3R1
OBS_BC_212564	V2LHS_39665	84.49	51.4	90459	THEX1
OBS_BC_212564	V2LHS_39665	83.95	37.12	90459	THEX1
OBS_BC_212567	V2LHS_39813	86.09	95.25	5523	PPP2R3A
OBS_BC_212567	V2LHS_39813	79.42	75.93	5523	PPP2R3A
OBS_BC_212572	V2LHS_40803	92.71	42.65	643414	LIPK
OBS_BC_212572	V2LHS_40803	90.92	31.07	643414	LIPK
OBS_BC_212573	V2LHS_48576	59.11	18.96	648	BMI1
OBS_BC_212573	V2LHS_48576	56.27	18.74	648	BMI1
OBS_BC_212576	V2LHS_214336	14.28	35.03	5610	EIF2AK2
OBS_BC_212576	V2LHS_214336	13.98	30.38	5610	EIF2AK2
OBS_BC_212578	V2LHS_57876	45.43	17.52	64843	ISL2
OBS_BC_212578	V2LHS_57876	40.42	16.89	64843	ISL2
OBS_BC_212579	V2LHS_193102	17.47	81.94	55527, 390834, 441957, 729524	FEM1A, LOC390834, LOC441957, LOC729524
OBS_BC_212579	V2LHS_193102	14.48	74.3	55527, 390834, 441957, 729524	FEM1A, LOC390834, LOC441957, LOC729524
OBS_BC_212582	V2LHS_134142	12.28	4.23	4067	LYN
OBS_BC_212582	V2LHS_134142	9.91	2.54	4067	LYN
OBS_BC_212584	V2LHS_47209	98.65	76.44	8942	KYNU
OBS_BC_212585	V2LHS_220706	39.68	60.16	5861	RAB1A
OBS_BC_212585	V2LHS_220706	37.35	59.63	5861	RAB1A
OBS_BC_212590	V2LHS_193484	87.4	83.53	9953	HS3ST3B1
OBS_BC_212590	V2LHS_193484	87.34	74.74	9953	HS3ST3B1
OBS_BC_212597	V2LHS_236481	89.86	96.26	391	RHOG
OBS_BC_212597	V2LHS_236481	89.59	91.84	391	RHOG
OBS_BC_212598	V2LHS_28538	82.53	59.09	23536	ADAT1
OBS_BC_212602	V2LHS_257234	47.41	87.13	10865	ARID5A
OBS_BC_212602	V2LHS_257234	44.9	81.57	10865	ARID5A
OBS_BC_212608	V2LHS_254235	64.86	25.87	23094	SIPA1L3
OBS_BC_212608	V2LHS_254235	62.81	19.23	23094	SIPA1L3
OBS_BC_212612	V2LHS_72906	29.9	51.38	1477	CSTF1
OBS_BC_212612	V2LHS_72906	24.94	44.71	1477	CSTF1
OBS_BC_212613	V2LHS_31181	57.79	64.39	6366	CCL21
OBS_BC_212613	V2LHS_31181	50.1	61.9	6366	CCL21
OBS_BC_212617	V2LHS_175607	5.81	13.62	55364	IMPACT
OBS_BC_212617	V2LHS_175607	5.7	7.45	55364	IMPACT
OBS_BC_212624	V2LHS_251161	90.68	79.07	23657	SLC7A11
OBS_BC_212624	V2LHS_251161	87.53	76.06	23657	SLC7A11
OBS_BC_212627	V2LHS_174146	14.64	59.84	54957	TXNL4B
OBS_BC_212627	V2LHS_174146	13.81	50.82	54957	TXNL4B
OBS_BC_212630	V2LHS_70202	26.1	17.13	29894	CPSF1
OBS_BC_212630	V2LHS_70202	23.09	15.24	29894	CPSF1
OBS_BC_212635	V2LHS_259460	21.18	93.94	2710	GK
OBS_BC_212635	V2LHS_259460	16.43	91.85	2710	GK
OBS_BC_212636	V2LHS_68374	55.94	96.29	9436	NCR2
OBS_BC_212639	V2LHS_189601	80.57	24.85	1378, 1379	CR1, CR1L
OBS_BC_212641	V2LHS_16711	44.44	69.93	8795	TNFRSF10B
OBS_BC_212641	V2LHS_16711	44.02	58.72	8795	TNFRSF10B
OBS_BC_212642	V2LHS_198866	2.33	0.57	10228	STX6
OBS_BC_212642	V2LHS_198866	1.77	0.07	10228	STX6
OBS_BC_212644	V2LHS_63257	39.94	7.4	3735	KARS
OBS_BC_212645	V2LHS_239398	2.8	3.21	3174	HNF4G
OBS_BC_212645	V2LHS_239398	1.58	0.25	3174	HNF4G
OBS_BC_212646	V2LHS_215507	81.67	97.08	23039	XPO7
OBS_BC_212646	V2LHS_215507	81.42	90.62	23039	XPO7
OBS_BC_212647	V2LHS_31521	82.74	92.36	6335	SCN9A
OBS_BC_212647	V2LHS_31521	79.84	79.99	6335	SCN9A
OBS_BC_212651	V2LHS_77211	72.69	99.89	1421	CRYGD
OBS_BC_212651	V2LHS_77211	69.32	99.73	1421	CRYGD
OBS_BC_212657	V2LHS_64126	45.3	30.95	2315	MLANA
OBS_BC_212657	V2LHS_64126	43.23	25.46	2315	MLANA
OBS_BC_212663	V2LHS_229724	79.44	56.92	57154	SMURF1
OBS_BC_212663	V2LHS_229724	78.67	44.86	57154	SMURF1
OBS_BC_212672	V2LHS_100534	92.47	76.22	340419	RSPO2
OBS_BC_212672	V2LHS_100534	89.35	71.52	340419	RSPO2
OBS_BC_212675	V2LHS_66497	69.62	61.18	7520	XRCC5
OBS_BC_212682	V2LHS_64912	91.64	65.91	924	CD7
OBS_BC_212682	V2LHS_64912	90.26	60.75	924	CD7
OBS_BC_212690	V2LHS_32210	30.78	25.55	6095	RORA
OBS_BC_212690	V2LHS_32210	27.03	19.5	6095	RORA
OBS_BC_212691	V2LHS_114090	6.94	30.85	2633	GBP1
OBS_BC_212691	V2LHS_114090	5.97	22.99	2633	GBP1
OBS_BC_212696	V2LHS_133354	68.84	23	3605	IL17A
OBS_BC_212696	V2LHS_133354	63.74	8.43	3605	IL17A
OBS_BC_212697	V2LHS_212649	92.15	59.36	27132	CPNE7
OBS_BC_212697	V2LHS_212649	90.54	53.37	27132	CPNE7
OBS_BC_212699	V2LHS_29443	2.74	6.09	163590	TOR1AIP2
OBS_BC_212699	V2LHS_29443	2.5	1.62	163590	TOR1AIP2
OBS_BC_212705	V2LHS_212155	40.49	67.61	149830	PRNT
OBS_BC_212705	V2LHS_212155	38.25	57.94	149830	PRNT
OBS_BC_212707	V2LHS_136227	82.54	91.1	79585	CORO7
OBS_BC_212707	V2LHS_136227	76.53	82.47	79585	CORO7
OBS_BC_212709	V2LHS_152505	54.69	40.32	5007	OSBP
OBS_BC_212715	V2LHS_208870	95.05	92.12	10655	DMRT2
OBS_BC_212716	V2LHS_58287	73.37	43.05	29978	UBQLN2
OBS_BC_212716	V2LHS_58287	68.11	41.28	29978	UBQLN2
OBS_BC_212717	V2LHS_99900	37.19	18.41	116443	GRIN3A
OBS_BC_212717	V2LHS_99900	33.22	14.88	116443	GRIN3A
OBS_BC_212718	V2LHS_111501	21.27	30.44	3552	IL1A
OBS_BC_212718	V2LHS_111501	20.01	23.17	3552	IL1A
OBS_BC_212722	V2LHS_46563	0.84	6.9	9052	GPRC5A
OBS_BC_212722	V2LHS_46563	0.49	4.84	9052	GPRC5A
OBS_BC_212723	V2LHS_252686	88.41	58.9	29083	GTPBP8
OBS_BC_212723	V2LHS_252686	88.4	58.65	29083	GTPBP8
OBS_BC_212729	V2LHS_134528	21.16	96.45	51611	DPH5
OBS_BC_212729	V2LHS_134528	20.16	94.24	51611	DPH5
OBS_BC_212735	V2LHS_95437	11.28	3.1	9843	HEPH
OBS_BC_212735	V2LHS_95437	9.89	2.73	9843	HEPH
OBS_BC_212739	V2LHS_284738	97.71	25.1	1572	CYP2F1
OBS_BC_212739	V2LHS_284738	97.47	14.81	1572	CYP2F1
OBS_BC_212742	V2LHS_201787	72.92	89.92	558	AXL
OBS_BC_212742	V2LHS_201787	67.71	87.58	558	AXL
OBS_BC_212748	V2LHS_171776	7.68	71.16	7329	UBE2I
OBS_BC_212758	V2LHS_200650	5.29	6.79	54737	MPHOSPH8
OBS_BC_212758	V2LHS_200650	4.89	3.34	54737	MPHOSPH8
OBS_BC_212761	V2LHS_275690	66.94	80.77	89845	ABCC10
OBS_BC_212761	V2LHS_275690	65.14	77.4	89845	ABCC10
OBS_BC_212764	V2LHS_155728	26.71	13.86	55714	ODZ3
OBS_BC_212765	V2LHS_190157	40.82	31.53	10476	ATP5H
OBS_BC_212765	V2LHS_190157	39.66	26.44	10476	ATP5H
OBS_BC_212769	V2LHS_139017	78.13	79.16	66037	BOLL
OBS_BC_212780	V2LHS_134519	54.77	25.39	51074	APIP
OBS_BC_212781	V2LHS_149452	61.48	59.66	57661	KIAA1542
OBS_BC_212781	V2LHS_149452	51.82	34.02	57661	KIAA1542
OBS_BC_212782	V2LHS_229596	74.51	75.07	51128	SAR1B
OBS_BC_212782	V2LHS_229596	72.13	72.79	51128	SAR1B
OBS_BC_212786	V2LHS_25207	73.3	31.03	23621	BACE1
OBS_BC_212797	V2LHS_16209	49.6	40.88	26583	DUX2
OBS_BC_212797	V2LHS_16209	42.91	28.05	26583	DUX2
OBS_BC_212799	V2LHS_45342	6.86	0.7	56984	PSMG2
OBS_BC_212800	V2LHS_15730	97.41	90.33	25793	FBXO7
OBS_BC_212800	V2LHS_15730	97.1	81.86	25793	FBXO7
OBS_BC_212805	V2LHS_71648	89.87	15.89	29104, 642897	N6AMT1, LOC642897
OBS_BC_212805	V2LHS_71648	89.15	11.77	29104, 642897	N6AMT1, LOC642897
OBS_BC_212807	V2LHS_63902	73.74	21.73	29761	USP25
OBS_BC_212807	V2LHS_63902	73.27	18	29761	USP25
OBS_BC_212809	V2LHS_173274	99.57	88.46	5696	PSMB8
OBS_BC_212809	V2LHS_173274	99.36	78.16	5696	PSMB8
OBS_BC_212818	V2LHS_14537	64.29	47.17	7373, 137886	COL14A1, LOC137886
OBS_BC_212818	V2LHS_14537	63.89	47.13	7373, 137886	COL14A1, LOC137886
OBS_BC_212823	V2LHS_187885	29.87	80.09	4501	MT1X
OBS_BC_212823	V2LHS_187885	28.61	54.57	4501	MT1X
OBS_BC_212824	V2LHS_234457	4.08	4.31	3067	HDC
OBS_BC_212824	V2LHS_234457	3.92	1.56	3067	HDC
OBS_BC_212826	V2LHS_219652	78.51	84.08	7178	TPT1
OBS_BC_212826	V2LHS_219652	77.18	70.56	7178	TPT1
OBS_BC_212834	V2LHS_52378	59.95	53.26	56890	MDM1
OBS_BC_212834	V2LHS_52378	59.04	51.94	56890	MDM1
OBS_BC_212835	V2LHS_221645	36.96	43.28	84824	FCRLA
OBS_BC_212835	V2LHS_221645	31.65	36.86	84824	FCRLA
OBS_BC_212844	V2LHS_212209	38.84	84.32	148979	GLIS1
OBS_BC_212847	V2LHS_159508	56.47	66.42	84698	CAPS2
OBS_BC_212849	V2LHS_228613	57.54	91.11	1300	COL10A1
OBS_BC_212849	V2LHS_228613	53.88	87.24	1300	COL10A1
OBS_BC_212850	V2LHS_230224	53.45	21.47	51631	LUC7L2
OBS_BC_212850	V2LHS_230224	47.32	18.38	51631	LUC7L2
OBS_BC_212853	V2LHS_286914	24.99	13.31	-	-
OBS_BC_212855	V2LHS_17978	56.79	54.64	1993	ELAVL2
OBS_BC_212855	V2LHS_17978	55.47	54.16	1993	ELAVL2
OBS_BC_212856	V2LHS_235704	82.87	32.78	2327	FMO2
OBS_BC_212857	V2LHS_261122	61.8	25.67	341350	OVCH1
OBS_BC_212857	V2LHS_261122	58.62	11.93	341350	OVCH1
OBS_BC_212859	V2LHS_111371	40.88	84.09	151230	KLHL23
OBS_BC_212861	V2LHS_197169	86.6	89.71	10630	PDPN
OBS_BC_212863	V2LHS_231977	43.66	94.64	5244	ABCB4
OBS_BC_212863	V2LHS_231977	43.22	89	5244	ABCB4
OBS_BC_212867	V2LHS_254998	37.97	40.38	64412	GZF1
OBS_BC_212867	V2LHS_254998	26.47	23.71	64412	GZF1
OBS_BC_212870	V2LHS_133080	59.85	23.64	3131	HLF
OBS_BC_212870	V2LHS_133080	57.09	19.28	3131	HLF
OBS_BC_212877	V2LHS_97960	97.11	50.77	51421	AMOTL2
OBS_BC_212878	V2LHS_16232	94.15	27.68	23582	CCNDBP1
OBS_BC_212878	V2LHS_16232	93.65	26.21	23582	CCNDBP1
OBS_BC_212880	V2LHS_269742	30.87	61.37	117286	CIB3
OBS_BC_212881	V2LHS_230414	56.63	27.68	8654	PDE5A
OBS_BC_212881	V2LHS_230414	55.19	26.5	8654	PDE5A
OBS_BC_212884	V2LHS_35148	35.41	98.24	6092	ROBO2
OBS_BC_212884	V2LHS_35148	33.99	91.38	6092	ROBO2
OBS_BC_212886	V2LHS_242162	33.07	41.59	-	-
OBS_BC_212886	V2LHS_242162	31.84	25.81	-	-
OBS_BC_212888	V2LHS_151677	86	76.99	4200	ME2
OBS_BC_212888	V2LHS_151677	85.93	69.33	4200	ME2
OBS_BC_212890	V2LHS_43931	16.65	54.81	1326	MAP3K8
OBS_BC_212890	V2LHS_43931	15.09	54.69	1326	MAP3K8
OBS_BC_212892	V2LHS_264501	19.08	63.52	51192	CKLF
OBS_BC_212892	V2LHS_264501	17.58	62.87	51192	CKLF
OBS_BC_212905	V2LHS_98766	92.46	72.26	79012	CAMKV
OBS_BC_212905	V2LHS_98766	91.49	66.57	79012	CAMKV
OBS_BC_212907	V2LHS_212521	65.27	20.75	23593	HEBP2
OBS_BC_212907	V2LHS_212521	54.7	16.07	23593	HEBP2
OBS_BC_212908	V2LHS_219169	2.07	85.43	55326	AGPAT5
OBS_BC_212908	V2LHS_219169	1.06	63.11	55326	AGPAT5
OBS_BC_212917	V2LHS_171204	51.07	26.28	5892	RAD51L3
OBS_BC_212918	V2LHS_177445	24.87	94.52	338382	RAB7B
OBS_BC_212918	V2LHS_177445	22.63	91.77	338382	RAB7B
OBS_BC_212920	V2LHS_178847	8.43	8.79	8632	DNAH17
OBS_BC_212920	V2LHS_178847	7.64	7.31	8632	DNAH17
OBS_BC_212924	V2LHS_239303	27.25	53.3	5465	PPARA
OBS_BC_212925	V2LHS_130934	51.87	83.58	2947	GSTM3
OBS_BC_212925	V2LHS_130934	41.79	70.65	2947	GSTM3
OBS_BC_212928	V2LHS_132014	20.8	55.79	2854	GPR32
OBS_BC_212934	V2LHS_171642	70.96	98.39	7275	TUB
OBS_BC_212934	V2LHS_171642	65.32	97.73	7275	TUB
OBS_BC_212935	V2LHS_194386	92.88	96.49	7314	UBB
OBS_BC_212935	V2LHS_194386	91.41	89.1	7314	UBB
OBS_BC_212936	V2LHS_65915	36.8	22.17	57834	CYP4F11
OBS_BC_212938	V2LHS_33810	11.57	80.98	7345	UCHL1
OBS_BC_212947	V2LHS_113042	7.72	5.92	163	AP2B1
OBS_BC_212948	V2LHS_31523	15.3	82.83	6335	SCN9A
OBS_BC_212948	V2LHS_31523	13.92	80.84	6335	SCN9A
OBS_BC_212949	V2LHS_250289	76.22	85.01	11078	TRIOBP
OBS_BC_212949	V2LHS_250289	70.11	77.24	11078	TRIOBP
OBS_BC_212950	V2LHS_138235	6.88	7.04	84227, 353299	RGSL2, RGSL1
OBS_BC_212950	V2LHS_138235	4.43	3.84	84227, 353299	RGSL2, RGSL1
OBS_BC_212954	V2LHS_16836	26.96	28.21	2958	GTF2A2
OBS_BC_212958	V2LHS_238216	31.77	36.75	3653	IPW
OBS_BC_212958	V2LHS_238216	26.56	31.61	3653	IPW
OBS_BC_212963	V2LHS_95518	56.35	63.04	9861	PSMD6
OBS_BC_212963	V2LHS_95518	50.87	61.71	9861	PSMD6
OBS_BC_212971	V2LHS_170617	84.31	85.21	5652	PRSS8
OBS_BC_212971	V2LHS_170617	83.09	70.04	5652	PRSS8
OBS_BC_212972	V2LHS_59423	79.6	58.86	3992	FADS1
OBS_BC_212972	V2LHS_59423	76.37	57.83	3992	FADS1
OBS_BC_212976	V2LHS_16879	17.85	13.01	8780	RIOK3
OBS_BC_212976	V2LHS_16879	16.44	8.99	8780	RIOK3
OBS_BC_212979	V2LHS_130653	22.33	58.46	290	ANPEP
OBS_BC_212979	V2LHS_130653	19.37	44.06	290	ANPEP
OBS_BC_212993	V2LHS_48904	47.8	24.99	155051	CRYGN
OBS_BC_212995	V2LHS_100863	38.31	76.93	4214	MAP3K1
OBS_BC_212995	V2LHS_100863	32.86	58.4	4214	MAP3K1
OBS_BC_212997	V2LHS_27736	45.66	15.86	8503	PIK3R3
OBS_BC_212997	V2LHS_27736	40.65	13.73	8503	PIK3R3
OBS_BC_212998	V2LHS_203143	59.52	62.6	5681	PSKH1
OBS_BC_212998	V2LHS_203143	53.48	57	5681	PSKH1
OBS_BC_213001	V2LHS_236889	30.17	70.57	53836	GPR87
OBS_BC_213001	V2LHS_236889	25.81	54.5	53836	GPR87
OBS_BC_213005	V2LHS_137259	88.88	86.13	80235	PIGZ
OBS_BC_213005	V2LHS_137259	88.26	79.84	80235	PIGZ
OBS_BC_213008	V2LHS_83188	62.31	91.61	2592	GALT
OBS_BC_213008	V2LHS_83188	55.43	75.29	2592	GALT
OBS_BC_213015	V2LHS_256039	34.29	90.12	10942	PRSS21
OBS_BC_213015	V2LHS_256039	31.47	76.32	10942	PRSS21
OBS_BC_213020	V2LHS_234248	37.24	56.65	549	AUH
OBS_BC_213020	V2LHS_234248	34.05	46.04	549	AUH
OBS_BC_213021	V2LHS_240414	80.81	87.77	9330	GTF3C3
OBS_BC_213021	V2LHS_240414	79.73	78.62	9330	GTF3C3
OBS_BC_213022	V2LHS_131523	1.66	4.56	5740	PTGIS
OBS_BC_213023	V2LHS_159544	34.38	56.5	84707	BEX2
OBS_BC_213023	V2LHS_159544	32.95	55.23	84707	BEX2
OBS_BC_213024	V2LHS_154281	16.2	34.26	26249	KLHL3
OBS_BC_213024	V2LHS_154281	16.14	17.03	26249	KLHL3
OBS_BC_213030	V2LHS_43372	82.36	54.31	26266	SLC13A4
OBS_BC_213030	V2LHS_43372	78.63	33.43	26266	SLC13A4
OBS_BC_213033	V2LHS_93365	10.51	98.5	2159	F10
OBS_BC_213033	V2LHS_93365	9.97	82.5	2159	F10
OBS_BC_213034	V2LHS_232888	43.5	27.11	5621	PRNP
OBS_BC_213034	V2LHS_232888	39.44	15.03	5621	PRNP
OBS_BC_213037	V2LHS_213986	77.91	78.22	4087	SMAD2
OBS_BC_213037	V2LHS_213986	74.07	66.15	4087	SMAD2
OBS_BC_213038	V2LHS_24874	3.69	10.51	123624	AGBL1
OBS_BC_213038	V2LHS_24874	2.59	4.38	123624	AGBL1
OBS_BC_213042	V2LHS_97287	47.07	96.39	51013	EXOSC1
OBS_BC_213054	V2LHS_143902	78.76	40.89	55999	NXF4
OBS_BC_213056	V2LHS_65792	73.44	49.6	29760	BLNK
OBS_BC_213056	V2LHS_65792	71.15	45.04	29760	BLNK
OBS_BC_213057	V2LHS_254379	45.57	38.94	-	-
OBS_BC_213058	V2LHS_176713	35.46	77.5	26291	FGF21
OBS_BC_213058	V2LHS_176713	34.26	47.72	26291	FGF21
OBS_BC_213059	V2LHS_193701	13.69	30.33	56965	PARP6
OBS_BC_213059	V2LHS_193701	11.78	29.07	56965	PARP6
OBS_BC_213062	V2LHS_205895	47.2	60.07	4345	CD200
OBS_BC_213062	V2LHS_205895	46.52	48.66	4345	CD200
OBS_BC_213064	V2LHS_18168	95.44	73.33	132204	SYNPR
OBS_BC_213064	V2LHS_18168	95.28	72.38	132204	SYNPR
OBS_BC_213065	V2LHS_286150	6.61	4.22	375189	PFN4
OBS_BC_213069	V2LHS_285488	70.19	92.32	9098, 162632, 220594, 284047	USP6, LOC162632, LOC220594, CCDC144B
OBS_BC_213069	V2LHS_285488	61.99	89.62	9098, 162632, 220594, 284047	USP6, LOC162632, LOC220594, CCDC144B
OBS_BC_213070	V2LHS_261439	42.46	67.24	27333	GOLIM4
OBS_BC_213074	V2LHS_71051	19.09	10.84	27165	GLS2
OBS_BC_213074	V2LHS_71051	14.69	1.76	27165	GLS2
OBS_BC_213077	V2LHS_239184	14.17	23.8	7181	NR2C1
OBS_BC_213078	V2LHS_151793	24.13	29.57	4295	MLN
OBS_BC_213078	V2LHS_151793	22.53	16.41	4295	MLN
OBS_BC_213079	V2LHS_83526	12.43	37.16	2235	FECH
OBS_BC_213079	V2LHS_83526	11.91	36.83	2235	FECH
OBS_BC_213087	V2LHS_150917	30.04	81.12	1395	CRHR2
OBS_BC_213091	V2LHS_202312	74.62	89.59	80312	TET1
OBS_BC_213091	V2LHS_202312	65.06	80.55	80312	TET1
OBS_BC_213092	V2LHS_22113	83.65	59.46	285513	GPRIN3
OBS_BC_213092	V2LHS_22113	80.96	48.06	285513	GPRIN3
OBS_BC_213096	V2LHS_247985	23.44	77.46	3855	KRT7
OBS_BC_213096	V2LHS_247985	23.18	67.29	3855	KRT7
OBS_BC_213098	V2LHS_207826	98.5	33.77	221393	GPR115
OBS_BC_213098	V2LHS_207826	98.02	30.34	221393	GPR115
OBS_BC_213099	V2LHS_248239	91.94	65.63	57568	SIPA1L2
OBS_BC_213099	V2LHS_248239	91.69	60.33	57568	SIPA1L2
OBS_BC_213102	V2LHS_136539	78.14	62.53	79651	RHBDF2
OBS_BC_213102	V2LHS_136539	76.82	57.45	79651	RHBDF2
OBS_BC_213104	V2LHS_238057	16.28	21.4	2906	GRIN2D
OBS_BC_213121	V2LHS_29001	87.89	83.49	22809	ATF5
OBS_BC_213121	V2LHS_29001	85.57	77.21	22809	ATF5
OBS_BC_213122	V2LHS_95143	18.06	8.14	10385	BTN2A2
OBS_BC_213122	V2LHS_95143	16.63	3.01	10385	BTN2A2
OBS_BC_213123	V2LHS_154114	32.03	26.5	120	ADD3
OBS_BC_213123	V2LHS_154114	30.92	23	120	ADD3
OBS_BC_213136	V2LHS_222094	51.44	46.28	2202	EFEMP1
OBS_BC_213136	V2LHS_222094	42.15	42.31	2202	EFEMP1
OBS_BC_213143	V2LHS_69841	65.51	34.49	7409	VAV1
OBS_BC_213146	V2LHS_95869	87.13	45.89	10443	N4BP2L2
OBS_BC_213146	V2LHS_95869	84.5	45.09	10443	N4BP2L2
OBS_BC_213147	V2LHS_15948	82.33	89.51	93517	HSPC105
OBS_BC_213149	V2LHS_151334	10.71	12.76	1946	EFNA5
OBS_BC_213149	V2LHS_151334	9.96	9.17	1946	EFNA5
OBS_BC_213151	V2LHS_14897	36.48	46.19	91624	NEXN
OBS_BC_213151	V2LHS_14897	31.02	27.18	91624	NEXN
OBS_BC_213153	V2LHS_48761	26.98	9.64	489	ATP2A3
OBS_BC_213153	V2LHS_48761	25.22	8.72	489	ATP2A3
OBS_BC_213154	V2LHS_210758	65.33	76.05	23787	MTCH1
OBS_BC_213154	V2LHS_210758	59.18	70.16	23787	MTCH1
OBS_BC_213159	V2LHS_21863	60.89	61.72	56606	SLC2A9
OBS_BC_213159	V2LHS_21863	60.04	55.55	56606	SLC2A9
OBS_BC_213162	V2LHS_67934	76.75	97.09	284355, 348825	TPRX1, TPRXL
OBS_BC_213162	V2LHS_67934	69.21	93.69	284355, 348825	TPRX1, TPRXL
OBS_BC_213164	V2LHS_97683	35.15	21.43	51135	IRAK4
OBS_BC_213164	V2LHS_97683	34.19	18.49	51135	IRAK4
OBS_BC_213168	V2LHS_131912	23	27.95	6871	TADA2L
OBS_BC_213168	V2LHS_131912	21.7	25.42	6871	TADA2L
OBS_BC_213169	V2LHS_17664	14.4	8.41	2059	EPS8
OBS_BC_213169	V2LHS_17664	13.58	8.03	2059	EPS8
OBS_BC_213171	V2LHS_39266	9.82	12.65	57088	PLSCR4
OBS_BC_213171	V2LHS_39266	8.45	2.66	57088	PLSCR4
OBS_BC_213175	V2LHS_286579	13.89	4.49	319101	KRT73
OBS_BC_213175	V2LHS_286579	11.86	3.91	319101	KRT73
OBS_BC_213176	V2LHS_75029	74.65	60.73	147183	KRT25
OBS_BC_213180	V2LHS_253055	92.26	34.7	23446	SLC44A1
OBS_BC_213180	V2LHS_253055	91.38	25.04	23446	SLC44A1
OBS_BC_213184	V2LHS_93010	69.58	96.51	4758	NEU1
OBS_BC_213184	V2LHS_93010	69.11	70.93	4758	NEU1
OBS_BC_213186	V2LHS_161088	77.86	97.52	57560	IFT80
OBS_BC_213187	V2LHS_221319	19.58	35.65	55300	PI4K2B
OBS_BC_213187	V2LHS_221319	17.43	27.41	55300	PI4K2B
OBS_BC_213188	V2LHS_84593	8.5	60.32	7531	YWHAE
OBS_BC_213196	V2LHS_27423	52.41	79.23	8536	CAMK1
OBS_BC_213196	V2LHS_27423	51.05	79.14	8536	CAMK1
OBS_BC_213197	V2LHS_238440	12.47	17.01	80329	ULBP1
OBS_BC_213197	V2LHS_238440	10.99	9.25	80329	ULBP1
OBS_BC_213198	V2LHS_257335	15.86	6.81	9749	PHACTR2
OBS_BC_213198	V2LHS_257335	13.12	2.16	9749	PHACTR2
OBS_BC_213206	V2LHS_284698	97.46	61.38	6407	SEMG2
OBS_BC_213206	V2LHS_284698	97.13	55.78	6407	SEMG2
OBS_BC_213207	V2LHS_96699	8.14	18.23	25949	SYF2
OBS_BC_213207	V2LHS_96699	7.75	1.95	25949	SYF2
OBS_BC_213209	V2LHS_239272	81.8	85.56	5916	RARG
OBS_BC_213209	V2LHS_239272	79.24	67.2	5916	RARG
OBS_BC_213211	V2LHS_224725	89.91	95.51	124925	SEZ6
OBS_BC_213213	V2LHS_81316	62.09	96.93	56547	MMP26
OBS_BC_213213	V2LHS_81316	59.57	94.17	56547	MMP26
OBS_BC_213214	V2LHS_219802	62.34	60.57	7294	TXK
OBS_BC_213214	V2LHS_219802	56.74	58.12	7294	TXK
OBS_BC_213218	V2LHS_117221	37.25	38.76	83539	CHST9
OBS_BC_213218	V2LHS_117221	36.12	26.35	83539	CHST9
OBS_BC_213220	V2LHS_87782	4.95	3.04	64151	NCAPG
OBS_BC_213220	V2LHS_87782	0.83	0.34	64151	NCAPG
OBS_BC_213225	V2LHS_188790	49.51	72.29	4018, 5340, 732436	LPA, PLG, LOC732436
OBS_BC_213225	V2LHS_188790	46.99	66.69	4018, 5340, 732436	LPA, PLG, LOC732436
OBS_BC_213226	V2LHS_197757	59.92	91.8	10633	RASL10A
OBS_BC_213227	V2LHS_131192	54.63	74.45	4129	MAOB
OBS_BC_213227	V2LHS_131192	52.68	63.7	4129	MAOB
OBS_BC_213230	V2LHS_84581	26.73	10.56	8315	BRAP
OBS_BC_213232	V2LHS_52621	48.86	42.19	93668	HPYR1
OBS_BC_213240	V2LHS_134655	35.27	12.19	51377	UCHL5
OBS_BC_213240	V2LHS_134655	34.14	1.53	51377	UCHL5
OBS_BC_213248	V2LHS_276591	19.03	89.04	54700	RRN3
OBS_BC_213248	V2LHS_276591	18.28	79.82	54700	RRN3
OBS_BC_213254	V2LHS_23639	0.92	10.04	8689	KRT36
OBS_BC_213254	V2LHS_23639	0.16	9.3	8689	KRT36
OBS_BC_213255	V2LHS_41416	87.56	92.68	8437	RASAL1
OBS_BC_213255	V2LHS_41416	84.49	70.32	8437	RASAL1
OBS_BC_213261	V2LHS_230136	66.71	71.22	23435, 100128223	TARDBP, LOC100128223
OBS_BC_213261	V2LHS_230136	65.86	66.62	23435, 100128223	TARDBP, LOC100128223
OBS_BC_213263	V2LHS_236682	73.42	31.97	51762	RAB8B
OBS_BC_213264	V2LHS_24365	25.59	24.3	1120, 1375	CHKB, CPT1B
OBS_BC_213264	V2LHS_24365	21.49	22.7	1120, 1375	CHKB, CPT1B
OBS_BC_213265	V2LHS_213216	24.22	34.29	3493, 83695	IGHA1, C12orf32
OBS_BC_213265	V2LHS_213216	22.52	28.78	3493, 83695	IGHA1, C12orf32
OBS_BC_213267	V2LHS_237611	84.19	99.88	341676	NEK5
OBS_BC_213267	V2LHS_237611	83.11	99.69	341676	NEK5
OBS_BC_213272	V2LHS_66985	87.28	30.17	8434	RECK
OBS_BC_213275	V2LHS_169662	17.67	22.56	3985	LIMK2
OBS_BC_213275	V2LHS_169662	16.88	7.24	3985	LIMK2
OBS_BC_213277	V2LHS_156313	0.3	11.09	55224	ETNK2
OBS_BC_213278	V2LHS_38861	74.63	48.62	222484	LNX2
OBS_BC_213278	V2LHS_38861	62.93	43.64	222484	LNX2
OBS_BC_213282	V2LHS_252517	17.94	87.62	25816	TNFAIP8
OBS_BC_213282	V2LHS_252517	16.87	84.94	25816	TNFAIP8
OBS_BC_213283	V2LHS_48011	43.6	70.58	118426	LOH12CR1
OBS_BC_213283	V2LHS_48011	39.11	55.17	118426	LOH12CR1
OBS_BC_213287	V2LHS_83151	53.84	41.86	2639	GCDH
OBS_BC_213288	V2LHS_56438	71.26	87.25	7301	TYRO3
OBS_BC_213288	V2LHS_56438	70.3	80.08	7301	TYRO3
OBS_BC_213290	V2LHS_285996	29.22	84.08	84324, 85406	CIP29, DNAJC14
OBS_BC_213290	V2LHS_285996	28.84	41.33	84324, 85406	CIP29, DNAJC14
OBS_BC_213296	V2LHS_12761	61.13	85.96	27130	INVS
OBS_BC_213296	V2LHS_12761	54.35	84.8	27130	INVS
OBS_BC_213300	V2LHS_251383	30.29	87.83	11133	KPTN
OBS_BC_213300	V2LHS_251383	28.83	85.53	11133	KPTN
OBS_BC_213303	V2LHS_83738	48.44	33.5	2131	EXT1
OBS_BC_213304	V2LHS_174411	71.46	52.29	55662	HIF1AN
OBS_BC_213304	V2LHS_174411	69.95	36.11	55662	HIF1AN
OBS_BC_213306	V2LHS_98658	28.57	92.7	78989	COLEC11
OBS_BC_213306	V2LHS_98658	23.63	91.39	78989	COLEC11
OBS_BC_213307	V2LHS_131391	64.04	87.76	5430	POLR2A
OBS_BC_213307	V2LHS_131391	59.27	79.16	5430	POLR2A
OBS_BC_213310	V2LHS_131818	75.58	98.02	2487	FRZB
OBS_BC_213310	V2LHS_131818	69.83	89.36	2487	FRZB
OBS_BC_213316	V2LHS_197550	42.76	76.67	10202	DHRS2
OBS_BC_213316	V2LHS_197550	41.82	68.41	10202	DHRS2
OBS_BC_213317	V2LHS_210552	36.61	28.98	10940	POP1
OBS_BC_213317	V2LHS_210552	34.7	15.25	10940	POP1
OBS_BC_213319	V2LHS_229554	20.81	62.94	57451	ODZ2
OBS_BC_213319	V2LHS_229554	18.85	57.75	57451	ODZ2
OBS_BC_213321	V2LHS_254705	96.08	99.59	11124	FAF1
OBS_BC_213323	V2LHS_81680	67.02	95.52	64283	RGNEF
OBS_BC_213323	V2LHS_81680	59.05	83.55	64283	RGNEF
OBS_BC_213325	V2LHS_38649	83.55	99.41	57109	REXO4
OBS_BC_213325	V2LHS_38649	79.12	99.29	57109	REXO4
OBS_BC_213327	V2LHS_71869	27.83	76.44	10016, 100129491	PDCD6, LOC100129491
OBS_BC_213329	V2LHS_69465	90.33	59.88	8079	MLF2
OBS_BC_213329	V2LHS_69465	86	38.89	8079	MLF2
OBS_BC_213332	V2LHS_98042	19.76	95.31	8649	MAP2K1IP1
OBS_BC_213332	V2LHS_98042	19.31	82.25	8649	MAP2K1IP1
OBS_BC_213337	V2LHS_233627	5.3	9.18	23316	CUX2
OBS_BC_213337	V2LHS_233627	2.12	5.91	23316	CUX2
OBS_BC_213340	V2LHS_64763	77.44	30.76	1795	DOCK3
OBS_BC_213340	V2LHS_64763	76.14	23.66	1795	DOCK3
OBS_BC_213346	V2LHS_171620	57.14	53.33	7080	NKX2-1
OBS_BC_213346	V2LHS_171620	51.55	45.61	7080	NKX2-1
OBS_BC_213347	V2LHS_16957	43.91	62.41	2786	GNG4
OBS_BC_213347	V2LHS_16957	42.99	61.4	2786	GNG4
OBS_BC_213359	V2LHS_63073	75.77	39.85	3853	KRT6A
OBS_BC_213359	V2LHS_63073	74.64	36.41	3853	KRT6A
OBS_BC_213362	V2LHS_27946	36.9	24.57	9440	MED17
OBS_BC_213362	V2LHS_27946	31.53	12.85	9440	MED17
OBS_BC_213364	V2LHS_204025	12.35	19.09	27121	DKK4
OBS_BC_213374	V2LHS_71833	44.48	73.27	27335	EIF3K
OBS_BC_213385	V2LHS_246572	51.68	25.62	27005	USP21
OBS_BC_213385	V2LHS_246572	49.25	22.14	27005	USP21
OBS_BC_213388	V2LHS_227139	17.22	12.21	51170	HSD17B11
OBS_BC_213388	V2LHS_227139	15.65	9.61	51170	HSD17B11
OBS_BC_213389	V2LHS_221432	65.6	67.89	54665	RSBN1
OBS_BC_213389	V2LHS_221432	63.6	49.85	54665	RSBN1
OBS_BC_213398	V2LHS_74077	90.89	95.12	53834	FGFRL1
OBS_BC_213398	V2LHS_74077	90.5	88.02	53834	FGFRL1
OBS_BC_213399	V2LHS_210883	59.07	88.11	23118	MAP3K7IP2
OBS_BC_213399	V2LHS_210883	52.65	85.92	23118	MAP3K7IP2
OBS_BC_213401	V2LHS_254805	96.85	25.4	284996	RNF149
OBS_BC_213401	V2LHS_254805	95.88	13.39	284996	RNF149
OBS_BC_213404	V2LHS_234466	70.76	44.73	51332	SPTBN5
OBS_BC_213404	V2LHS_234466	66.1	36.45	51332	SPTBN5
OBS_BC_213406	V2LHS_69164	89.78	92.76	57504	MTA3
OBS_BC_213406	V2LHS_69164	89.34	78.49	57504	MTA3
OBS_BC_213421	V2LHS_254622	74.09	77.35	81847	RNF146
OBS_BC_213421	V2LHS_254622	73.5	53.91	81847	RNF146
OBS_BC_213422	V2LHS_235868	40	24.73	79582	SPAG16
OBS_BC_213422	V2LHS_235868	36.06	16.63	79582	SPAG16
OBS_BC_213427	V2LHS_81512	31.27	26.65	347689	SOX2OT
OBS_BC_213432	V2LHS_272083	52.53	48.89	-	-
OBS_BC_213432	V2LHS_272083	50.78	47.29	-	-
OBS_BC_213435	V2LHS_133594	73.44	19.45	3739	KCNA4
OBS_BC_213436	V2LHS_36574	61.43	73.28	9189	ZBED1
OBS_BC_213436	V2LHS_36574	58.23	62.81	9189	ZBED1
OBS_BC_213438	V2LHS_237039	10.58	99.79	493	ATP2B4
OBS_BC_213439	V2LHS_205222	19.36	27.41	27012	KCNV1
OBS_BC_213439	V2LHS_205222	19.06	19.25	27012	KCNV1
OBS_BC_213440	V2LHS_195512	46.12	48.24	646627	LOC646627
OBS_BC_213440	V2LHS_195512	39.34	35.6	646627	LOC646627
OBS_BC_213441	V2LHS_170624	37.4	90.49	5653	KLK6
OBS_BC_213441	V2LHS_170624	37.04	88.66	5653	KLK6
OBS_BC_213442	V2LHS_218486	33.43	45.37	5888	RAD51
OBS_BC_213442	V2LHS_218486	30.83	42.97	5888	RAD51
OBS_BC_213450	V2LHS_233945	87.93	68.26	3329, 345041, 644745, 645548	HSPD1, LOC345041, LOC644745, LOC645548
OBS_BC_213450	V2LHS_233945	85.78	64.93	3329, 345041, 644745, 645548	HSPD1, LOC345041, LOC644745, LOC645548
OBS_BC_213452	V2LHS_67331	26.23	41.28	9577	BRE
OBS_BC_213452	V2LHS_67331	26.14	35.2	9577	BRE
OBS_BC_213456	V2LHS_47242	90.42	72.59	6364	CCL20
OBS_BC_213456	V2LHS_47242	85.22	61.63	6364	CCL20
OBS_BC_213459	V2LHS_24089	62.53	42.14	1602	DACH1
OBS_BC_213462	V2LHS_179349	14.56	30.97	254013	MGC50559
OBS_BC_213462	V2LHS_179349	10.69	16.45	254013	MGC50559
OBS_BC_213464	V2LHS_254870	52.17	47.95	9817	KEAP1
OBS_BC_213464	V2LHS_254870	45.84	41.91	9817	KEAP1
OBS_BC_213465	V2LHS_284498	26.62	87.4	55716	LMBR1L
OBS_BC_213465	V2LHS_284498	25.4	80.7	55716	LMBR1L
OBS_BC_213466	V2LHS_32424	91.22	42.93	8453	CUL2
OBS_BC_213466	V2LHS_32424	88.58	26.73	8453	CUL2
OBS_BC_213467	V2LHS_15749	66.54	98.01	130872	AHSA2
OBS_BC_213467	V2LHS_15749	65.98	97.76	130872	AHSA2
OBS_BC_213473	V2LHS_220115	54.15	97.05	5774	PTPN3
OBS_BC_213473	V2LHS_220115	47.88	86.31	5774	PTPN3
OBS_BC_213474	V2LHS_57279	58.18	91.14	5790	PTPRCAP
OBS_BC_213477	V2LHS_36184	9.04	11.8	9229	DLGAP1
OBS_BC_213477	V2LHS_36184	7.42	3.87	9229	DLGAP1
OBS_BC_213480	V2LHS_170210	84.34	50.8	5424	POLD1
OBS_BC_213480	V2LHS_170210	82.28	46.99	5424	POLD1
OBS_BC_213482	V2LHS_259422	63.81	83.06	6772	STAT1
OBS_BC_213483	V2LHS_72005	67.57	58.18	57180, 653857, 100131882, 100133409	ACTR3B, ARP11, LOC100131882, LOC100133409
OBS_BC_213486	V2LHS_136515	21.73	77.39	79646	PANK3
OBS_BC_213486	V2LHS_136515	21.71	66.24	79646	PANK3
OBS_BC_213488	V2LHS_178465	59.34	87.33	85455	DISP2
OBS_BC_213488	V2LHS_178465	44.39	73.68	85455	DISP2
OBS_BC_213491	V2LHS_213710	85.29	93.77	8266	UBL4A
OBS_BC_213491	V2LHS_213710	82.59	88.05	8266	UBL4A
OBS_BC_213494	V2LHS_180854	22.06	62.57	374666, 375260, 375690, 376475, 653440, 653635	WASH3P, WASH2P, WASH1, LOC376475, WASH6P, LOC653635
OBS_BC_213498	V2LHS_48773	95.97	89.63	3607	FOXK2
OBS_BC_213498	V2LHS_48773	95.73	82.88	3607	FOXK2
OBS_BC_213503	V2LHS_55679	46.61	24.19	7169	TPM2
OBS_BC_213503	V2LHS_55679	41.87	23.33	7169	TPM2
OBS_BC_213505	V2LHS_130888	20.98	5.04	2914	GRM4
OBS_BC_213505	V2LHS_130888	20.36	2	2914	GRM4
OBS_BC_213511	V2LHS_95409	92.09	60.71	9833	MELK
OBS_BC_213511	V2LHS_95409	91.43	55.79	9833	MELK
OBS_BC_213514	V2LHS_199015	29	45.46	25820	ARIH1
OBS_BC_213514	V2LHS_199015	26.58	39.39	25820	ARIH1
OBS_BC_213517	V2LHS_173665	46.99	13.04	54892	NCAPG2
OBS_BC_213517	V2LHS_173665	45.18	9.61	54892	NCAPG2
OBS_BC_213519	V2LHS_42225	32.84	80.11	219902	TMEM136
OBS_BC_213524	V2LHS_174999	84.46	91.72	55775	TDP1
OBS_BC_213524	V2LHS_174999	83.1	76.79	55775	TDP1
OBS_BC_213526	V2LHS_242683	79.75	58.15	9319	TRIP13
OBS_BC_213526	V2LHS_242683	79.45	52.08	9319	TRIP13
OBS_BC_213527	V2LHS_242361	51.92	90.11	55889, 342096, 441728, 645752, 647988, 653641, 653643	GOLGA6B, GOLGA6, LOC441728, LOC645752, LOC647988, LOC653641, LOC653643
OBS_BC_213544	V2LHS_97736	23.33	36.52	51513	ETV7
OBS_BC_213544	V2LHS_97736	19.8	29.34	51513	ETV7
OBS_BC_213547	V2LHS_239549	95.36	52.14	3174	HNF4G
OBS_BC_213547	V2LHS_239549	93.66	50.78	3174	HNF4G
OBS_BC_213548	V2LHS_18054	74.92	39.94	136332	LRGUK
OBS_BC_213548	V2LHS_18054	74.79	36.2	136332	LRGUK
OBS_BC_213551	V2LHS_132662	63.05	99.81	372	ARCN1
OBS_BC_213551	V2LHS_132662	61.03	99.24	372	ARCN1
OBS_BC_213553	V2LHS_239975	49.37	53.43	83401	ELOVL3
OBS_BC_213556	V2LHS_161203	45.99	82.54	81704	DOCK8
OBS_BC_213556	V2LHS_161203	42.81	72.88	81704	DOCK8
[truncated: 11,377 more rows]
